# Supplementary material
Source: PubMed Central journal article supplement (PMC3624561)
Supplement: JB.02201-12_zjb999092519so1.pdf [file JB.02201-12_zjb999092519so1.pdf]

## SUPPLEMENTARY METHODS

### Strains, plasmids and primers

The strains, plasmids and primers used in this study are listed in Supplementary Table S1 (1, 2, 5), S2 (10), and S3 (3, 9), respectively.

### Construction of deletion mutants via replacement with an antibiotic cassette

To construct strains in which a gene was deleted, an antibiotic resistance cassette flanked by the regions upstream and downstream of the gene sequence was amplified with the gene-Fr-F/gene-Fr-R and gene-Ba-F/gene-Ba-R primer sets, respectively (Table S3). The resulting three fragments were ligated using recombinant PCR, and integrated into the *B. subtilis* strain 168 BFA genome via double crossover recombination with selection for antibiotic resistance. To construct a deletion mutant of NCIB3610, the strain was transformed with chromosomal DNA from newly generated strain 168 BFA deletion mutants. To obtain double-deletion mutant strains, chromosomal DNA of one deletion mutant was transferred into the other deletion mutant strain.

### Deletion of *sinI* using a marker-free gene disruption method

For deletion of the *sinI* gene, we performed a method of marker-free gene disruption comprising three steps (7).

In the first step, *sinI* was replaced with an erythromycin resistance cassette amplified from a pMUTin2HC plasmid using the primer set rRCP-ermF/rRCP-ermR, as described above.

In the second step, a cassette in which *mazF* (a toxin gene encoding endoribonuclease that cleaves free mRNAs) under control of IPTG-inducible *spac* promoter, fused with the flanking sequences of the *sinI* region, was inserted between the front and internal sequence of the erythromycin resistance gene to remove the entire marker region in single-crossover recombination via counter-selection. Upstream (fragment A) and downstream (fragment B) sequences of the *sinI* region were amplified from *B. subtilis*

168 BFA genomic DNA using the primer sets, sinI-Fr-F/sinI-Fr-r and sinI-Ba-f/sinI-Ba-r, respectively. The *mazF* cassette was amplified using primers pAPNC-F and chpA-R from genomic DNA of *B. subtilis* TMO310 (168, *aprE::spec<sup>R</sup>*, *lacI*, *Pspac-mazF*). An internal sequence in the erythromycin resistance region (fragment C) was amplified using primers emD-F<sub>2</sub> and Erm-R. PCR products were fused using recombinant PCR in the order A-B-*mazF*-cassette-C, using primers sinI-Fr-F and Erm-R, and integrated into the *sinI* deletion strain generated in the first step through homologous recombination between fragment A and C loci. The resulting recombinants were selected for spectinomycin resistance in the absence of IPTG.

In the last step, the inserted *mazF* cassette was removed to obtain marker-free *sinI* disruption. The primary transformant achieved in the second step was cultivated in the presence of IPTG (i.e., *mazF* toxin-inducing conditions), and clones in which the *mazF* cassette had been removed by intramolecular homologous recombination at region B were selected.

### **Construction of the SinR2HC strain**

To construct a *B. subtilis* strain expressing SinR C-terminally tagged with twelve histidines and a chitin-binding domain (SinR-2HC), the *sinR* gene without the stop codon was amplified from *B. subtilis* 168 BFA genomic DNA using primers sinI-Ba-f and sinR-6his-r. The coding sequence of the 2HC tag and a chloramphenicol resistance gene were amplified from plasmids pMUTin2HC and pDLT3 using the DC-2HC-F/DC-2HC-R and rPCR-CmF2/rPCR-CmR2 primer sets, respectively. The downstream region of *sinR* was amplified from *B. subtilis* 168 BFA genomic DNA with the sinR-Cm-Ba-f<sub>2</sub> and sinR-Cm-Ba-r primers. Subsequently, the four fragments were ligated with recombinant PCR using primers sinI-Ba-f and sinR-Cm-Ba-r, and employed to transform *B. subtilis* 168 BFA cells, followed by double-crossover recombination with selection for chloramphenicol resistance to create the SinR2HC strain.

### **Construction of pO-veg, pO-veg12His and pO-MCS plasmids**

Expression plasmids for Veg (pO-veg), Veg-12His (pO-veg12His) and a negative control plasmid (pO-MCS) were created using the Gateway cloning system (Invitrogen), as described previously (4). To construct pO-veg, the *veg* gene was amplified from *B. subtilis* 168 BFA chromosomal DNA using primers attB1-SD-veg-F, in which the SD sequence of the *hbs* gene and half of the *attB1* sequence are attached at the 5' end, and attB2-veg-R, in which half of *attB2* sequence is attached at the 5' end. To construct pO-veg12His, a *veg* gene translationally fused with a coding sequence of twelve histidines (*veg-12xhis*) was amplified from chromosomal DNA of strain LY001 (168; *veg::pMUTinHisΔveg*) using the primers attB1-SD-veg-F and pM12HisR-attB2. To construct pO-MCS, the multi-cloning site was amplified from pUC19 using primers pUCMCS-F-adapter and pUCMCS-R-adapter. Next, entire recombination sites for BP clonase, *attB1* and *attB2*, were attached to the first PCR products in the second PCR using the adapter primers, Adapter-attB1 and Adapter-attB2. Fragments were cloned into an entry vector, pDONR201 (Invitrogen), with BP clonase to create entry clones, followed by transfer to a pOGW destination vector (4), according to Gateway technology instructions. For transformation of *B. subtilis* strains, the resulting plasmids were amplified in *E. coli recA*<sup>+</sup> strain, C600.

### **Protein stability of Veg**

Cells expressing Veg from the P<sub>spac</sub> promoter on the pO-veg plasmid were grown in LB in the presence of 1 mM IPTG at 37°C with shaking. When cell cultures attained OD<sub>600</sub> of 0.4-0.5, protein synthesis was inhibited by the addition of chloramphenicol to a final concentration of 200 µg ml<sup>-1</sup>. Samples (10 ml) taken at the indicated times were harvested by centrifugation at 6000 g for 3 min, washed once with 1 ml chilled killing buffer, and stored at -80°C. Cells were resuspended in lysis buffer (25 mM Tris-HCl [pH 8.0], 10 mM EDTA, 50 mM glucose, 1 mM DTT, 1x protease inhibitor cocktail [Roche]), and incubated for 10 min at 37°C. After mixing with SDS sample buffer, followed by centrifugation to remove cell debris, proteins in the supernatant equivalent to 0.02 OD<sub>600</sub> units were separated on 10-20% (w/v) Tris-tricine polyacrylamide gel and transferred to Immobilon-P<sup>SQ</sup> membranes (Millipore) for 1 h at 10 V in a semi-dry

transfer apparatus (Bio-Rad). Transferred proteins were detected using anti-Veg at 1/20000 dilution as the primary antibody, followed by secondary anti-rabbit IgG antibody (Bio-Rad) at 1/8000 dilution conjugated to horseradish peroxidase. Proteins were detected, as described above. The signal intensities of protein bands on X-ray films were quantified using the NIH-Imagine program (11). To estimate relative abundance, standard curves were determined by loading two-fold serial dilutions of the sample (t=0) on each gel, and the levels of other samples estimated by comparing protein band intensities with the linear range of the standard curve.

### **Transcriptome analysis**

Isolation of total RNA, synthesis of complementary DNA, terminal labeling and hybridization with the tiling array were performed according to the Affymetrix instruction manual (8). Biologically independent experiments were performed in duplicate (Table S6). Transcriptome information on Spo0A (6), AbrB (2) and SigD (12) is additionally included (Table S4).

## **REFERENCES**

1. **Chu, F., D. B. Kearns, S. S. Branda, R. Kolter, and R. Losick.** 2006. Targets of the master regulator of biofilm formation in *Bacillus subtilis*. *Mol. Microbiol.* **59**:1216-28.
2. **Chumsakul, O., H. Takahashi, T. Oshima, T. Hishimoto, S. Kanaya, N. Ogasawara, and S. Ishikawa.** 2011. Genome-wide binding profiles of the *Bacillus subtilis* transition state regulator AbrB and its homolog Abh reveals their interactive role in transcriptional regulation. *Nucleic Acids Res.* **39**:414-28.
3. **Guerout-Fleury, A. M., K. Shazand, N. Frandsen, and P. Stragier.** 1995. Antibiotic-resistance cassettes for *Bacillus subtilis*. *Gene* **167**:335-6.
4. **Ishikawa, S., Y. Kawai, K. Hiramatsu, M. Kuwano, and N. Ogasawara.** 2006. A new FtsZ-interacting protein, YlmF, complements the activity of FtsA during progression of cell division in *Bacillus subtilis*. *Mol. Microbiol.* **60**:1364-80.

5. **Kearns, D. B., and R. Losick.** 2003. Swarming motility in undomesticated *Bacillus subtilis*. *Mol. Microbiol.* **49**:581-90.
6. **Molle, V., M. Fujita, S. T. Jensen, P. Eichenberger, J. E. Gonzalez-Pastor, J. S. Liu, and R. Losick.** 2003. The Spo0A regulon of *Bacillus subtilis*. *Mol. Microbiol.* **50**:1683-701.
7. **Morimoto, T., K. Ara, K. Ozaki, and N. Ogasawara.** 2009. A new simple method to introduce marker-free deletions in the *Bacillus subtilis* genome. *Genes Genet Syst.* **84**:315-8.
8. **Morimoto, T., R. Kadoya, K. Endo, M. Tohata, K. Sawada, S. Liu, T. Ozawa, T. Kodama, H. Kakeshita, Y. Kageyama, K. Manabe, S. Kanaya, K. Ara, K. Ozaki, and N. Ogasawara.** 2008. Enhanced recombinant protein productivity by genome reduction in *Bacillus subtilis*. *DNA Res.* **15**:73-81.
9. **Morimoto, T., P. C. Loh, T. Hirai, K. Asai, K. Kobayashi, S. Moriya, and N. Ogasawara.** 2002. Six GTP-binding proteins of the Era/Obg family are essential for cell growth in *Bacillus subtilis*. *Microbiology* **148**:3539-52.
10. **Okumura, H., M. Yoshimura, M. Ueki, T. Oshima, N. Ogasawara, and S. Ishikawa.** 2012. Regulation of chromosomal replication initiation by *oriC*-proximal DnaA-box clusters in *Bacillus subtilis*. *Nucleic Acids Res.* **40**:220-34.
11. **Rasband, W., and D. Bright.** 1995. NIH Image: a public domain image processing program for the Macintosh. *Microbeam Anal.* **4**:137-149.
12. **Serizawa, M., H. Yamamoto, H. Yamaguchi, Y. Fujita, K. Kobayashi, N. Ogasawara, and J. Sekiguchi.** 2004. Systematic analysis of SigD-regulated genes in *Bacillus subtilis* by DNA microarray and Northern blotting analyses. *Gene* **329**:125-36.

## SUPPLEMENTARY FIGURE LEGENDS

### **Fig. S1. Stability of Veg protein and confirmation of the overproduction in different growth media.**

(A) Cells of LY016 (168 BFA strain harboring pO-veg) were grown to the mid-logarithmic phase in the presence of 1 mM IPTG in LB at 37°C and treated with chloramphenicol to block protein synthesis. Veg proteins remaining in the cells at the indicated times were detected by Western blotting with the anti-Veg antibody. The Veg protein level at each time-point was measured, as described in Supplementary Methods, and plotted on a chart. (B) pO-veg (LY016) strain was grown to the mid-logarithmic phase in LB, SMM and MSgg in the presence of 1 mM IPTG at 37°C, and Veg in cells equivalents to 0.02 OD<sub>600</sub> units was detected by Western blotting with anti-Veg antibody. The signal intensities of Veg bands on X-ray films were quantified using the NIH-Imagine program and the signal intensities relative to that of cells cultivated in LB are shown below the bands.

### **Fig. S2. Comparison of the architecture of pellicles formed by mutants of regulators for biofilm formation.**

Pellicles of strains with mutation(s), indicated at the upper side and the left side of each picture, were formed by cultivation in liquid MSgg medium for 72 h at 30°C. Strains with additional  $\Delta veg$  mutation, introduction of pO-MCS (as a negative control for pO-veg) and pO-veg were additionally examined. Strains harboring plasmid were cultured in the presence of 1 mM IPTG. The scale bar is 0.5 cm.

### **Fig. S3. Expression of $P_{eps}$ -lacZ and $P_{tapA}$ -lacZ in WT, $\Delta abrB$ and $\Delta sinR$ strains after 24 h cultivation**

Expression of  $P_{eps}$ -lacZ and  $P_{tapA}$ -lacZ was compared on solid MSgg medium containing X-Gal and 1 mM IPTG after cultivation for 24 h at 30°C. The scale bar is 0.2 cm.

**Fig. S4. Effects of SinR2HC on the architecture of colonies.** The architecture of colonies formed by WT (168 BFA), SinR2HC (LY083) and  $\Delta sinR$  (LY012) strains grown on MSgg plates for 72 h at 30°C. The scale bar is 0.5 cm.

## Fig. S1

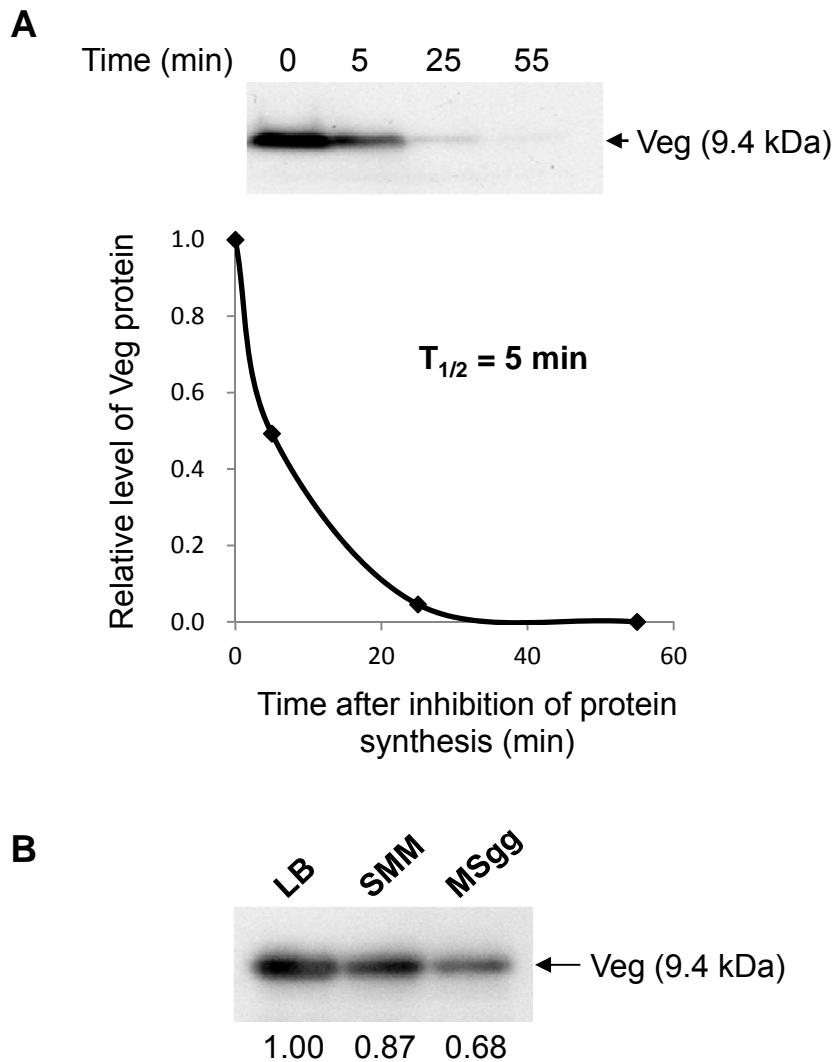

### Fig. S1. Stability of Veg protein and confirmation of the overproduction in different growth media

(A) Cells of LY016 (168 BFA harboring pO-veg) were grown to the mid-logarithmic phase in the presence of 1 mM IPTG in LB at 37°C and treated with chloramphenicol to block protein synthesis. Veg proteins remaining in the cells at the indicated times were detected by Western blotting with the anti-Veg antibody. The Veg protein level at each time-point was measured, as described in Supplementary Methods, and plotted on a chart. (B) pO-veg (LY016) strain was grown to the mid-logarithmic phase in LB, SMM and MSgg in the presence of 1mM IPTG at 37°C, and Veg in cells equivalents to 0.02 OD<sub>600</sub> units was detected by Western blotting with anti-Veg antibody. The signal intensities of Veg bands on X-ray films were quantified using the NIH-Imagine program and the signal intensities relative to that of cells cultivated in LB are shown below the bands.



**Fig. S2**

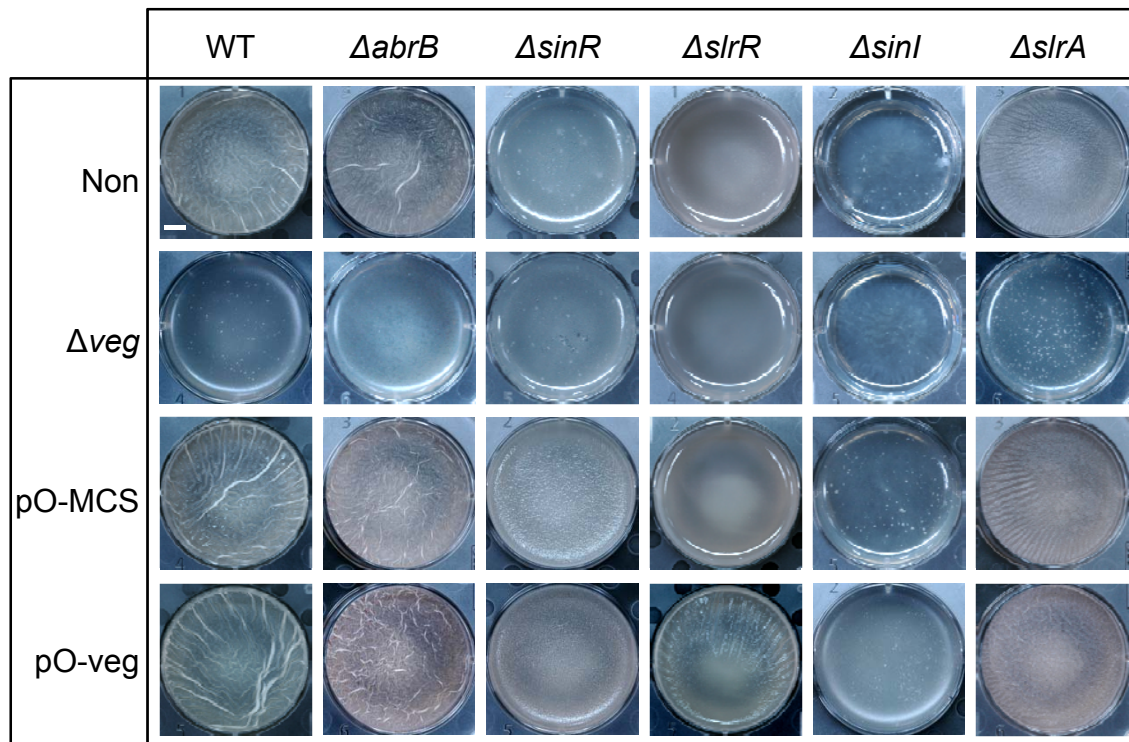

**Fig. S2. Comparison of the architecture of pellicles formed by mutants of regulators for biofilm formation**

Pellicles of strains with mutation(s), indicated at the upper side and the left side of each picture, were formed by cultivation in liquid MSgg medium for 72 h at 30°C. Strains with additional  $\Delta veg$  mutation, introduction of pO-MCS (as a negative control for pO-veg) and pO-veg were additionally examined. Strains harboring plasmid were cultured in the presence of 1 mM IPTG. The scale bar is 0.5 cm.

**Fig. S3**

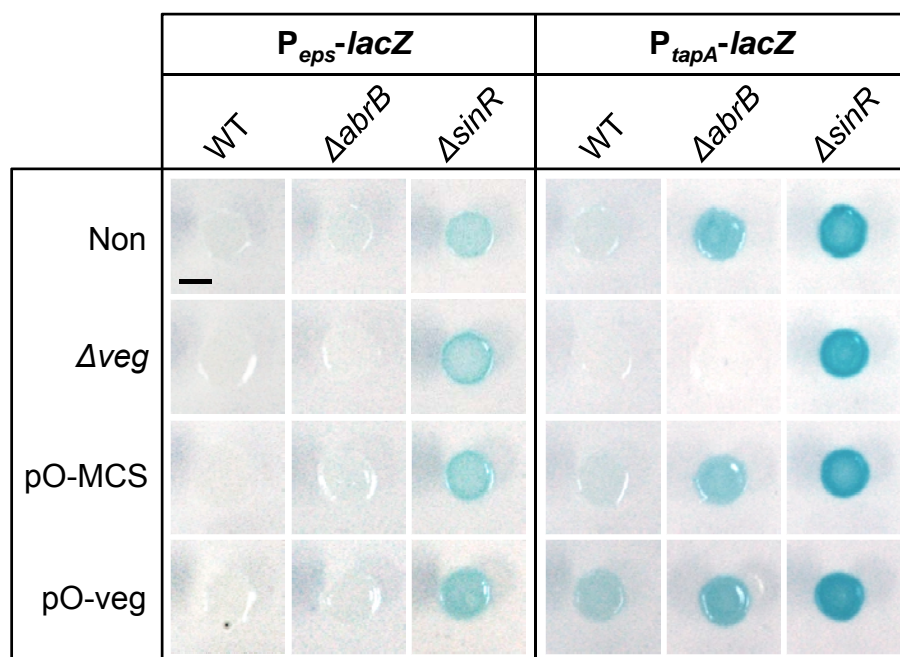

**Fig. S3. Expression of  $P_{eps}$ -lacZ and  $P_{tapA}$ -lacZ in WT,  $\DeltaabrB$  and  $\Delta sinR$  strains after 24 h cultivation**

Expression of  $P_{eps}$ -lacZ and  $P_{tapA}$ -lacZ was compared on solid MSgg medium containing X-Gal and 1 mM IPTG after cultivation for 24 h at 30°C. The scale bar is 0.2 cm.

**Fig. S4**

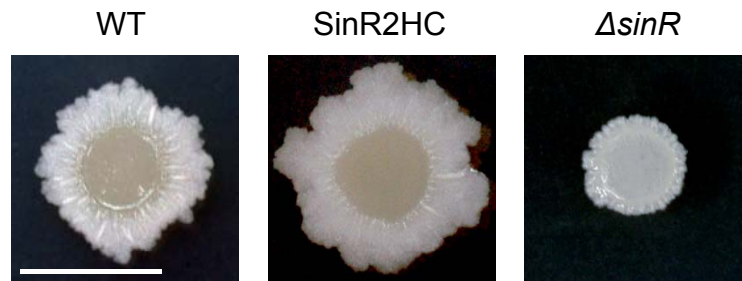

**Fig. S4. Effects of SinR2HC on the architecture of colonies.**

The architecture of colonies formed by WT (168 BFA), SinR2HC (LY083) and  $\Delta sinR$  (LY012) strains grown on MSgg plates for 72 h at 30°C. The scale bar is 0.5 cm.

**Table S1.** Bacterial strains

| Strain   | Relevant genotype and description <sup>a</sup>                          | Reference and source <sup>b</sup>              |
|----------|-------------------------------------------------------------------------|------------------------------------------------|
| 168 BFA  | <i>trpC2</i>                                                            | Laboratory stock                               |
| NCIB3610 | undomesticated wild type                                                | Laboratory stock                               |
| DS1882   | 3610 <i>epsH::tet amyE::P<sub>eps</sub>-lacZ cat</i>                    | 5                                              |
| DS3352   | 3610 <i>epsH::tet amyE::P<sub>tapA</sub>-lacZ cat</i>                   | 1                                              |
| OC003    | 168 <i>abrB::spec</i>                                                   | 2                                              |
| TMO310   | 168 <i>aprE::spec lacI P<sub>spac</sub>-mazF</i>                        | 7                                              |
| LY001    | 168 <i>veg::pMUTinHisΔveg</i>                                           | pMUTinHisΔveg → 168 BFA                        |
| LY002    | 168 <i>veg::pMUTin2HCΔveg</i>                                           | pMUTin2HCΔveg → 168 BFA                        |
| LY011    | 168 <i>veg::cat</i>                                                     | PCR product → 168 BFA                          |
| LY012    | 168 <i>sinR::kan</i>                                                    | PCR product → 168 BFA                          |
| LY013    | 168 <i>slrR::kan</i>                                                    | PCR product → 168 BFA                          |
| LY014    | 168 <i>sinI</i> (no marker)                                             | PCR product → 168 BFA (removal of <i>erm</i> ) |
| LY015    | 168 pO-MCS <i>tet</i>                                                   | pO-MCS → 168 BFA                               |
| LY016    | 168 pO-veg <i>tet</i>                                                   | pO-veg → 168 BFA                               |
| LY017    | 168 <i>veg::cat sinR::kan</i>                                           | LY012 → LY011                                  |
| LY018    | 168 <i>veg::cat slrR::kan</i>                                           | LY013 → LY011                                  |
| LY019    | 168 <i>veg::cat sinI</i>                                                | LY011 → LY014                                  |
| LY020    | 168 <i>slrR::kan sinI</i>                                               | LY013 → LY014                                  |
| LY021    | 168 <i>veg::cat slrR::kan sinI</i>                                      | LY013 → LY019                                  |
| LY022    | 168 <i>sinR::kan</i> pO-MCS <i>tet</i>                                  | LY012 → LY015                                  |
| LY023    | 168 <i>sinR::kan</i> pO-veg <i>tet</i>                                  | LY012 → LY016                                  |
| LY024    | 168 <i>slrR::kan</i> pO-MCS <i>tet</i>                                  | pO-MCS → LY013                                 |
| LY025    | 168 <i>slrR::kan</i> pO-veg <i>tet</i>                                  | pO-veg → LY013                                 |
| LY026    | 168 <i>sinI</i> pO-MCS <i>tet</i>                                       | pO-MCS → LY014                                 |
| LY027    | 168 <i>sinI</i> pO-veg <i>tet</i>                                       | pO-veg → LY014                                 |
| LY028    | 168 <i>slrR::kan sinI</i> pO-MCS <i>tet</i>                             | pO-MCS → LY020                                 |
| LY029    | 168 <i>slrR::kan sinI</i> pO-veg <i>tet</i>                             | pO-veg → LY020                                 |
| LY030    | 168 <i>veg::erm</i>                                                     | pCm::Em → LY011                                |
| LY031    | 168 <i>epsH::tet amyE::P<sub>eps</sub>-lacZ cat</i>                     | DS1882 → 168 BFA                               |
| LY032    | 168 <i>epsH::tet amyE::P<sub>tapA</sub>-lacZ cat</i>                    | DS3352 → 168 BFA                               |
| LY033    | 168 <i>epsH::spec amyE::P<sub>tapA</sub>-lacZ cat</i>                   | pTc::Sp → LY032                                |
| LY034    | 168 <i>epsH::spec</i>                                                   | LY033 → 168 BFA                                |
| LY035    | 168 <i>epsH::spec amyE::P<sub>eps</sub>-lacZ cat</i>                    | LY034 → LY031                                  |
| LY036    | 168 <i>epsH::spec amyE::P<sub>eps</sub>-lacZ cat</i> pO-MCS <i>tet</i>  | pO-MCS → LY035                                 |
| LY037    | 168 <i>epsH::spec amyE::P<sub>eps</sub>-lacZ cat</i> pO-veg <i>tet</i>  | pO-veg → LY035                                 |
| LY038    | 168 <i>epsH::spec amyE::P<sub>tapA</sub>-lacZ cat</i> pO-MCS <i>tet</i> | pO-MCS → LY033                                 |
| LY039    | 168 <i>epsH::spec amyE::P<sub>tapA</sub>-lacZ cat</i> pO-veg <i>tet</i> | pO-veg → LY033                                 |
| LY040    | 168 <i>veg::erm epsH::tet amyE::P<sub>eps</sub>-lacZ cat</i>            | LY030 → LY031                                  |
| LY041    | 168 <i>veg::erm epsH::tet amyE::P<sub>tapA</sub>-lacZ cat</i>           | LY030 → LY032                                  |
| LY042    | 168 <i>sinR::kan epsH::tet amyE::P<sub>eps</sub>-lacZ cat</i>           | LY012 → LY031                                  |
| LY043    | 168 <i>sinR::kan epsH::tet amyE::P<sub>tapA</sub>-lacZ cat</i>          | LY012 → LY032                                  |
| LY044    | 168 <i>slrR::kan epsH::tet amyE::P<sub>eps</sub>-lacZ cat</i>           | LY013 → LY031                                  |
| LY045    | 168 <i>slrR::kan epsH::tet amyE::P<sub>tapA</sub>-lacZ cat</i>          | LY013 → LY032                                  |
| LY046    | 168 <i>sinI epsH::tet amyE::P<sub>eps</sub>-lacZ cat</i>                | LY031 → LY014                                  |
| LY047    | 168 <i>sinI epsH::tet amyE::P<sub>tapA</sub>-lacZ cat</i>               | LY032 → LY014                                  |
| LY048    | 3610 <i>veg::cat</i>                                                    | LY011 → NCIB3610                               |
| LY057    | 3610 pO-MCS <i>tet</i>                                                  | pO-MCS → LY015                                 |
| LY058    | 3610 pO-veg <i>tet</i>                                                  | pO-veg → LY016                                 |
| LY066    | 168 <i>abrB::kan</i>                                                    | pSp::Km → OC003                                |
| LY068    | 168 <i>abrB::kan epsH::tet amyE::P<sub>eps</sub>-lacZ cat</i>           | LY066 → LY031                                  |

|       |                                                                                                                |                       |
|-------|----------------------------------------------------------------------------------------------------------------|-----------------------|
| LY069 | 168 <i>abrB</i> :: <i>kan epsH</i> :: <i>tet amyE</i> ::P <sub>tapA</sub> - <i>lacZ cat</i>                    | LY066 → LY032         |
| LY070 | 168 <i>veg</i> :: <i>cat abrB</i> :: <i>kan</i>                                                                | LY066 → LY011         |
| LY071 | 168 <i>abrB</i> :: <i>kan</i> pO-MCS <i>tet</i>                                                                | pO-MCS → LY066        |
| LY072 | 168 <i>abrB</i> :: <i>kan</i> pO-veg <i>tet</i>                                                                | pO-veg → LY066        |
| LY083 | 168 <i>sinR</i> -2 <i>hc cat</i>                                                                               | PCR product → 168 BFA |
| LY084 | 168 <i>sinR</i> -2 <i>hc cat</i> pO-MCS <i>tet</i>                                                             | LY083 → LY015         |
| LY085 | 168 <i>sinR</i> -2 <i>hc cat</i> pO-veg <i>tet</i>                                                             | LY083 → LY016         |
| LY091 | 168 <i>slrA</i> :: <i>kan</i>                                                                                  | PCR product → 168 BFA |
| LY092 | 168 <i>slrA</i> :: <i>kan epsH</i> :: <i>tet amyE</i> ::P <sub>eps</sub> - <i>lacZ cat</i>                     | LY091 → LY031         |
| LY093 | 168 <i>slrA</i> :: <i>kan epsH</i> :: <i>tet amyE</i> ::P <sub>tapA</sub> - <i>lacZ cat</i>                    | LY091 → LY032         |
| LY131 | 168 <i>sinR</i> :: <i>kan epsH</i> :: <i>spec amyE</i> ::P <sub>eps</sub> - <i>lacZ cat</i> pO-MCS <i>tet</i>  | LY012 → LY036         |
| LY132 | 168 <i>sinR</i> :: <i>kan epsH</i> :: <i>spec amyE</i> ::P <sub>eps</sub> - <i>lacZ cat</i> pO-veg <i>tet</i>  | LY012 → LY037         |
| LY133 | 168 <i>sinR</i> :: <i>kan epsH</i> :: <i>spec amyE</i> ::P <sub>tapA</sub> - <i>lacZ cat</i> pO-MCS <i>tet</i> | LY012 → LY038         |
| LY134 | 168 <i>sinR</i> :: <i>kan epsH</i> :: <i>spec amyE</i> ::P <sub>tapA</sub> - <i>lacZ cat</i> pO-veg <i>tet</i> | LY012 → LY039         |
| LY135 | 168 <i>veg</i> :: <i>erm sinR</i> :: <i>kan epsH</i> :: <i>tet amyE</i> ::P <sub>eps</sub> - <i>lacZ cat</i>   | LY012 → LY040         |
| LY136 | 168 <i>veg</i> :: <i>erm sinR</i> :: <i>kan epsH</i> :: <i>tet amyE</i> ::P <sub>tapA</sub> - <i>lacZ cat</i>  | LY012 → LY041         |
| LY137 | 168 <i>slrR</i> :: <i>kan epsH</i> :: <i>spec amyE</i> ::P <sub>eps</sub> - <i>lacZ cat</i> pO-MCS <i>tet</i>  | LY013 → LY036         |
| LY138 | 168 <i>slrR</i> :: <i>kan epsH</i> :: <i>spec amyE</i> ::P <sub>eps</sub> - <i>lacZ cat</i> pO-veg <i>tet</i>  | LY013 → LY037         |
| LY139 | 168 <i>slrR</i> :: <i>kan epsH</i> :: <i>spec amyE</i> ::P <sub>tapA</sub> - <i>lacZ cat</i> pO-MCS <i>tet</i> | LY013 → LY038         |
| LY140 | 168 <i>slrR</i> :: <i>kan epsH</i> :: <i>spec amyE</i> ::P <sub>tapA</sub> - <i>lacZ cat</i> pO-veg <i>tet</i> | LY013 → LY039         |
| LY141 | 168 <i>veg</i> :: <i>erm slrR</i> :: <i>kan epsH</i> :: <i>tet amyE</i> ::P <sub>eps</sub> - <i>lacZ cat</i>   | LY013 → LY040         |
| LY142 | 168 <i>veg</i> :: <i>erm slrR</i> :: <i>kan epsH</i> :: <i>tet amyE</i> ::P <sub>tapA</sub> - <i>lacZ cat</i>  | LY013 → LY041         |
| LY143 | 168 <i>slrA</i> :: <i>kan epsH</i> :: <i>spec amyE</i> ::P <sub>eps</sub> - <i>lacZ cat</i> pO-MCS <i>tet</i>  | LY091 → LY036         |
| LY144 | 168 <i>slrA</i> :: <i>kan epsH</i> :: <i>spec amyE</i> ::P <sub>eps</sub> - <i>lacZ cat</i> pO-veg <i>tet</i>  | LY091 → LY037         |
| LY145 | 168 <i>slrA</i> :: <i>kan epsH</i> :: <i>spec amyE</i> ::P <sub>tapA</sub> - <i>lacZ cat</i> pO-MCS <i>tet</i> | LY091 → LY038         |
| LY146 | 168 <i>slrA</i> :: <i>kan epsH</i> :: <i>spec amyE</i> ::P <sub>tapA</sub> - <i>lacZ cat</i> pO-veg <i>tet</i> | LY091 → LY039         |
| LY147 | 168 <i>veg</i> :: <i>erm slrA</i> :: <i>kan epsH</i> :: <i>tet amyE</i> ::P <sub>eps</sub> - <i>lacZ cat</i>   | LY091 → LY040         |
| LY148 | 168 <i>veg</i> :: <i>erm slrA</i> :: <i>kan epsH</i> :: <i>tet amyE</i> ::P <sub>tapA</sub> - <i>lacZ cat</i>  | LY091 → LY041         |
| LY149 | 168 <i>abrB</i> :: <i>kan epsH</i> :: <i>spec amyE</i> ::P <sub>eps</sub> - <i>lacZ cat</i> pO-MCS <i>tet</i>  | LY066 → LY036         |
| LY150 | 168 <i>abrB</i> :: <i>kan epsH</i> :: <i>spec amyE</i> ::P <sub>eps</sub> - <i>lacZ cat</i> pO-veg <i>tet</i>  | LY066 → LY037         |
| LY151 | 168 <i>abrB</i> :: <i>kan epsH</i> :: <i>spec amyE</i> ::P <sub>tapA</sub> - <i>lacZ cat</i> pO-MCS <i>tet</i> | LY066 → LY038         |
| LY152 | 168 <i>abrB</i> :: <i>kan epsH</i> :: <i>spec amyE</i> ::P <sub>tapA</sub> - <i>lacZ cat</i> pO-veg <i>tet</i> | LY066 → LY039         |
| LY153 | 168 <i>veg</i> :: <i>erm abrB</i> :: <i>kan epsH</i> :: <i>tet amyE</i> ::P <sub>eps</sub> - <i>lacZ cat</i>   | LY066 → LY040         |
| LY154 | 168 <i>veg</i> :: <i>erm abrB</i> :: <i>kan epsH</i> :: <i>tet amyE</i> ::P <sub>tapA</sub> - <i>lacZ cat</i>  | LY066 → LY041         |
| LY155 | 168 <i>sinI epsH</i> :: <i>spec amyE</i> ::P <sub>eps</sub> - <i>lacZ cat</i> pO-MCS <i>tet</i>                | LY035 → LY026         |
| LY156 | 168 <i>sinI epsH</i> :: <i>spec amyE</i> ::P <sub>eps</sub> - <i>lacZ cat</i> pO-veg <i>tet</i>                | LY035 → LY027         |
| LY157 | 168 <i>sinI epsH</i> :: <i>spec amyE</i> ::P <sub>tapA</sub> - <i>lacZ cat</i> pO-MCS <i>tet</i>               | LY033 → LY026         |
| LY158 | 168 <i>sinI epsH</i> :: <i>spec amyE</i> ::P <sub>tapA</sub> - <i>lacZ cat</i> pO-veg <i>tet</i>               | LY033 → LY027         |
| LY159 | 168 <i>veg</i> :: <i>erm sinI epsH</i> :: <i>tet amyE</i> ::P <sub>eps</sub> - <i>lacZ cat</i>                 | LY030 → LY046         |
| LY160 | 168 <i>veg</i> :: <i>erm sinI epsH</i> :: <i>tet amyE</i> ::P <sub>tapA</sub> - <i>lacZ cat</i>                | LY030 → LY047         |
| LY161 | 3610 <i>veg</i> :: <i>erm epsH</i> :: <i>tet amyE</i> ::P <sub>eps</sub> - <i>lacZ cat</i>                     | LY030 → DS1882        |
| LY162 | 3610 <i>veg</i> :: <i>erm epsH</i> :: <i>tet amyE</i> ::P <sub>tapA</sub> - <i>lacZ cat</i>                    | LY030 → DS3352        |

<sup>a</sup> Antibiotic resistance genes are expressed as follows: *spec* , spectinomycin; *cat* , chloramphenicol; *kan* , kanamycin; *erm* , erythromycin; *tet* , tetracycline; *neo* , neomycin.

<sup>b</sup> '→' indicates a transformation with chromosomal DNA, plasmid DNA or PCR product.

**Table S2.** Plasmids

| Plasmid      | Description                                                                                                | Reference and source  |
|--------------|------------------------------------------------------------------------------------------------------------|-----------------------|
| pO-MCS       | A shuttle vector in <i>E. coli</i> and <i>B. subtilis</i> carrying the multiple cloning site sequence of   | 10                    |
| pO-veg       | A shuttle vector in <i>E. coli</i> and <i>B. subtilis</i> carrying the insert sequence of <i>veg</i>       | This study            |
| pO-vegx12his | A shuttle vector in <i>E. coli</i> and <i>B. subtilis</i> carrying the insert sequence of <i>vegx12his</i> | This study            |
| pCm::Em      | An antibiotic-resistance cassette switching vector from chloramphenicol to erythromycin                    | Yoshimura unpublished |
| pTc::Sp      | An antibiotic-resistance cassette switching vector from tetracycline to spectinomycin                      | Yoshimura unpublished |
| pSp::Km      | An antibiotic-resistance cassette switching vector from spectinomycin to kanamycin                         | Yoshimura unpublished |

Table S3. Primers

| Primer                                                            | Sequence (5' -> 3') <sup>a</sup>                              | Location  |           |        | Description                       | Reference  |
|-------------------------------------------------------------------|---------------------------------------------------------------|-----------|-----------|--------|-----------------------------------|------------|
|                                                                   |                                                               | start     | end       | strand |                                   |            |
| <b>Deletion of <i>veg</i> from the <i>B. subtilis</i> genome</b>  |                                                               |           |           |        |                                   |            |
| veg-Fr-f                                                          | GAAACAGTTCAAACAGCCCGAAAAAAGATCCCTCAC                          | 52,245    | 52,280    | +      | Genome DNA of 168 BFA             | This study |
| veg-Fr-r                                                          | gctctctggtagctatccATTGTACAACACGAGCCCATTTTGTGC                 | 52,739    | 52,713    | -      | Genome DNA of 168 BFA             | This study |
| veg-Ba-f                                                          | cggaaagatacatcctggGAGCTGACATTTAATGATGACGCCGC                  | 52,977    | 53,002    | +      | Genome DNA of 168 BFA             | This study |
| veg-Ba-r                                                          | CATTGTATCACATTTGAAGTACAGGATGAACATATCC                         | 53,475    | 53,439    | -      | Genome DNA of 168 BFA             | This study |
| <b>Deletion of <i>sinR</i> from the <i>B. subtilis</i> genome</b> |                                                               |           |           |        |                                   |            |
| sinR-Fr-F                                                         | GAATACCATCTAGAAAAACAGGCGC                                     | 2,551,388 | 2,551,412 | +      | Genome DNA of 168 BFA             | This study |
| sinR-Fr-R                                                         | gctctctggtagctatccGTGATATTATAGCACATTCAGAAAGG                  | 2,551,868 | 2,551,843 | -      | Genome DNA of 168 BFA             | This study |
| sinR-Ba-F                                                         | cggaaagatacatcctggGGGTATCGAAAAACAATTCGTG                      | 2,552,149 | 2,552,173 | +      | Genome DNA of 168 BFA             | This study |
| sinR-Ba-R                                                         | GTCTGCTAAAAATGATGCAGCGCC                                      | 2,552,676 | 2,552,653 | -      | Genome DNA of 168 BFA             | This study |
| <b>Deletion of <i>slrR</i> from the <i>B. subtilis</i> genome</b> |                                                               |           |           |        |                                   |            |
| slrR-Fr-F                                                         | GATTCAGATAGGTGCAATCCGCC                                       | 3,528,593 | 3,528,616 | +      | Genome DNA of 168 BFA             | This study |
| slrR-Fr-R                                                         | gctctctggtagctatccAATGTTTCTGTTTCATTATAAAGG                    | 3,529,106 | 3,529,083 | -      | Genome DNA of 168 BFA             | This study |
| slrR-Ba-F                                                         | cggaaagatacatcctggGGAAGATGATGATCGGTTAAAGGGC                   | 3,529,581 | 3,529,605 | +      | Genome DNA of 168 BFA             | This study |
| slrR-Ba-R                                                         | GACAATGACTTCTCCCTGTGCCGC                                      | 3,530,057 | 3,530,034 | -      | Genome DNA of 168 BFA             | This study |
| <b>Deletion of <i>slrA</i> from the <i>B. subtilis</i> genome</b> |                                                               |           |           |        |                                   |            |
| slrA-Fr-F                                                         | TGCTCCTTTGCTGTACCCGGCGCC                                      | 3,921,843 | 3,921,866 | +      | Genome DNA of 168 BFA             | This study |
| slrA-Fr-R                                                         | gctctctggtagctatccAATGTTTCTGCAACATGCGGGC                      | 3,922,321 | 3,922,298 | -      | Genome DNA of 168 BFA             | This study |
| slrA-Ba-F                                                         | cggaaagatacatcctggACCGTCCGCAAGACTAGTCCGAAC                    | 3,922,483 | 3,922,507 | +      | Genome DNA of 168 BFA             | This study |
| slrA-Ba-R                                                         | AGCTTGAAGACGGCGTTGCAGC                                        | 3,922,993 | 3,922,970 | -      | Genome DNA of 168 BFA             | This study |
| <b>Deletion of <i>sinI</i> from the <i>B. subtilis</i> genome</b> |                                                               |           |           |        |                                   |            |
| sinI-Fr-F                                                         | GAAGATTTCAAAGCAAGCTGACCC                                      | 2,551,154 | 2,551,178 | +      | Genome DNA of 168 BFA             | This study |
| sinI-Fr-R                                                         | gctctctggtagctatccTTATGTATTTCAGCCAGTCCGGCC                    | 2,551,651 | 2,551,628 | -      | Genome DNA of 168 BFA             | This study |
| sinI-Ba-F                                                         | cggaaagatacatcctggTCTGCTCATCCTGTCCGGCAGCC                     | 2,551,801 | 2,551,824 | +      | Genome DNA of 168 BFA             | This study |
| sinI-Ba-R                                                         | GAAAATGAAAAAGCGCATAGCGAGG                                     | 2,552,348 | 2,552,324 | -      | Genome DNA of 168 BFA             | This study |
| sinI-Fr-f                                                         | ggctccggaccagatgagcagaTTATGTATTTCAGCCAGTCCGGCC                | 2,551,651 | 2,551,628 | -      | Genome DNA of 168 BFA             | This study |
| sinI-Ba-f                                                         | TCTGCTCATCCTGGTCCGGCAGCC                                      | 2,551,801 | 2,551,824 | +      | Genome DNA of 168 BFA             | This study |
| sinI-Ba-r                                                         | gcttgtagcaattcctctgcGAAAAATGAAAAAGCGCATAGCGAGG                | 2,552,348 | 2,552,324 | -      | Genome DNA of 168 BFA             | This study |
| sinI-Fr-F2                                                        | AATGTCACGATTTTACATACAGTCCG                                    | 2,551,070 | 2,551,094 | +      | Genome DNA of 168 BFA             | This study |
| pAPNC-F                                                           | CGACAGCGGAATTGACTCAAGC                                        |           |           |        | Genome DNA of TMO310              | 7          |
| chpA-R                                                            | CGCGGATCTACCAATCAGTACGTTAATTTTG                               |           |           |        | Genome DNA of TMO310              | 7          |
| emD-F2                                                            | acgtactgattggtaggatccgcGAGTAAAAAGTACTCAACC                    |           |           |        | Genome DNA of TMO310 and pMUTinNC | This study |
| Erm-R                                                             | caccgccagcctaaccgatCTAACATCCCTTTAGTAACTGTAAAC                 |           |           |        | pMUTinNC                          | 9          |
| <b>Construction of pO-veg and pO-veg×12his</b>                    |                                                               |           |           |        |                                   |            |
| attB1-SD-veg-F                                                    | aaaaagcagcctcttgggaagaggtgaaagcATGGCGAAGACGTTGTCCGATATTTAAAAG | 52,761    | 52,789    | +      | Genome DNA of 168 BFA             | This study |
| attB2-veg-R                                                       | agaagctgggtCTAAATGCCACTGAGCTTGCAGCGC                          | 53,021    | 52,997    | -      | Genome DNA of 168 BFA             | This study |
| pM12HisRattB2                                                     | ggggaccattgtacaagaagctggctGAGCTCTCATCTATTTAATGG               |           |           |        | 12 x His                          | 2          |
| pUCMCS-F-adapter                                                  | aaaaagcagcctctTTGTA AAAACGACGCGCCAGTG                         |           |           |        | pUC19                             | This study |
| pUCMCS-R-adapter                                                  | agaagctgggtcTGACCATGATTACGCCAAGC                              |           |           |        | pUC19                             | This study |
| Adapter-attB1                                                     | GGGGACAAGTTTGTACAAAAAAGCAGGCTCG                               |           |           |        | <i>attB1</i> site                 | Invitrogen |
| Adapter-attB2                                                     | GGGGACCACTTTGTACAAAGAAAGCTGGGTC                               |           |           |        | <i>attB2</i> site                 | Invitrogen |
| pDONR-F                                                           | TCGCGTTAACGCTAGCATGGATCTCG                                    |           |           |        | pDONR201                          | Invitrogen |
| pDONR-R                                                           | GTGTCTCAAATCTCTGATGTTAC                                       |           |           |        | pDONR201                          | Invitrogen |
| OidFNruI3                                                         | CCTCTAGAGTCAAATGTGAG                                          |           |           |        | pMUTinHis                         | 4          |
| TerRSmalb                                                         | cgcgccgggGGGTTATTTGCTCATGAGCG                                 |           |           |        | pMUTinHis                         | 4          |
| <b>Construction of the SinR2HC strain</b>                         |                                                               |           |           |        |                                   |            |
| sinI-Ba-f                                                         | TCTGCTCATCCTGGTCCGGCAGCC                                      | 2,551,801 | 2,551,824 | +      | Genome DNA of 168 BFA             | This study |
| sinR-6his-r                                                       | gtgatggtaggtgtagctctctctCTCCTCTTTTGGGATTTTCTCC                | 2,552,217 | 2,552,195 | -      | Genome DNA of 168 BFA             | This study |
| sinR-Cm-Ba-f2                                                     | cggaaagatacatcctggCACTAACTCCTCTTTGTCAATAACC                   | 2,552,235 | 2,552,260 | +      | Genome DNA of 168 BFA             | This study |
| sinR-Cm-Ba-r                                                      | GTTGACAGTTGGAAAAGAGGGCGGC                                     | 2,552,760 | 2,552,736 | -      | Genome DNA of 168 BFA             | This study |
| DC-2HC-F                                                          | ATGAGAGGATCGCATACC                                            |           |           |        | pMUTin2HC                         | 2          |
| DC-2HC-R                                                          | gctctctggtagctatccTCATCTATTTATTGAAGCTGC                       |           |           |        | pMUTin2HC                         | 2          |
| <b>Antibiotics cassette</b>                                       |                                                               |           |           |        |                                   |            |
| rPCR-CmF2                                                         | ggatagactcaccagaagagcATCATCGGCAATAGTTACCC                     |           |           |        | pDLT3                             | 9          |
| rPCR-CmR2                                                         | ccaggatgtagtctcctcCGGCGTAGAGGATCTGGAGC                        |           |           |        | pDLT3                             | 9          |
| rPCR-KmF                                                          | ggatagactcaccagaagagcCGCAAAGCTTACGATAAACCCAGC                 |           |           |        | pDG780                            | 3          |
| rPCR-KmR                                                          | ccaggatgtagtctcctcCTAGGTAATAACAATTCATCC                       |           |           |        | pDG780                            | 3          |
| rPCR-ermF                                                         | ggatagactcaccagaagagcAACAATAGGGGTTCCCGCGCA                    |           |           |        | pMUTin2HC                         | 2          |
| rPCR-ermR                                                         | ccaggatgtagtctcctcCTCATAGAATTATTCCTCCCG                       |           |           |        | pMUTin2HC                         | 2          |

<sup>a</sup> Capital and lower-case letters correspond to sequences annealed to a template and attached tag sequence, and underlined letters indicate an endonuclease recognition site.

**Table S4.** Genes up- or down-regulated in Veg overexpression cells (pO-veg) more than 2-fold compared with its control cells (pO-MCS).

| Transcription unites  | Gene name                   | Location  |           |        | Expression ratio <sup>a</sup> |                                                                                            | Gene function |
|-----------------------|-----------------------------|-----------|-----------|--------|-------------------------------|--------------------------------------------------------------------------------------------|---------------|
|                       |                             | start     | end       | strand | pO-veg/pO-MCS                 |                                                                                            |               |
| <b>Up-regulated</b>   |                             |           |           |        |                               |                                                                                            |               |
| 1                     | <i>ydaE</i>                 | 472,143   | 472,646   | +      | 2.7 ± 0.9                     | unknown                                                                                    |               |
| 2                     | <i>ydcO</i>                 | 531,853   | 532,113   | +      | 2.6 ± 0.5                     | unknown                                                                                    |               |
|                       | <i>ydcT</i>                 | 535,965   | 536,231   | +      | 2.3 ± 0.4                     | unknown                                                                                    |               |
| 3                     | <i>xlyB</i>                 | 1,316,849 | 1,317,802 | +      | 2.3 ± 0.2                     | N-acetylmuramoyl-L-alanine amidase, peptidoglycan hydrolase                                |               |
| 4                     | <i>xkdB</i>                 | 1,321,325 | 1,322,158 | +      | 2.0 ± 0.0                     | PBSX prophage protein                                                                      |               |
|                       | <i>xkDD</i>                 | 1,323,110 | 1,323,460 | +      | 2.3 ± 0.3                     | PBSX prophage protein                                                                      |               |
|                       | <i>xpf</i>                  | 1,323,779 | 1,324,288 | +      | 2.3 ± 0.2                     | RNA polymerase PBSX sigma factor, PBSX prophage protein                                    |               |
|                       | <i>xkdh</i>                 | 1,330,202 | 1,330,558 | +      | 2.4 ± 0.4                     | PBSX prophage protein                                                                      |               |
|                       | <i>xkdl</i>                 | 1,330,555 | 1,331,040 | +      | 2.3 ± 0.3                     | PBSX prophage protein                                                                      |               |
|                       | <i>xkdJ</i>                 | 1,331,053 | 1,331,493 | +      | 2.1 ± 0.2                     | PBSX prophage protein                                                                      |               |
|                       | <i>xkdo</i>                 | 1,334,279 | 1,338,277 | +      | 2.5 ± 0.6                     | PBSX prophage protein                                                                      |               |
|                       | <i>xkdp</i>                 | 1,338,222 | 1,338,929 | +      | 2.6 ± 0.8                     | PBSX prophage protein                                                                      |               |
|                       | <i>xkdQ</i>                 | 1,338,945 | 1,339,922 | +      | 2.6 ± 0.6                     | PBSX prophage protein                                                                      |               |
|                       | <i>xkdr</i>                 | 1,339,922 | 1,340,188 | +      | 2.8 ± 0.7                     | PBSX prophage protein                                                                      |               |
|                       | <i>xkds</i>                 | 1,340,245 | 1,340,670 | +      | 2.5 ± 0.4                     | PBSX prophage protein                                                                      |               |
|                       | <i>xkdt</i>                 | 1,340,663 | 1,341,709 | +      | 2.4 ± 0.5                     | PBSX prophage protein                                                                      |               |
|                       | <i>xkdu</i>                 | 1,341,693 | 1,342,271 | +      | 2.5 ± 0.5                     | PBSX prophage protein                                                                      |               |
|                       | <i>xkdv</i>                 | 1,342,542 | 1,344,605 | +      | 2.5 ± 0.6                     | PBSX prophage protein                                                                      |               |
|                       | <i>xkdw</i>                 | 1,344,617 | 1,344,946 | +      | 2.6 ± 0.7                     | PBSX prophage protein                                                                      |               |
|                       | <i>xkdx</i>                 | 1,344,943 | 1,345,107 | +      | 3.0 ± 0.6                     | PBSX prophage protein                                                                      |               |
|                       | <i>xepA</i>                 | 1,345,151 | 1,345,990 | +      | 2.5 ± 0.3                     | lytic exoenzyme associated with PBSX prophage                                              |               |
|                       | <i>xhIA</i>                 | 1,346,043 | 1,346,312 | +      | 2.3 ± 0.3                     | involved in cell lysis upon induction of PBSX                                              |               |
|                       | <i>xlyA</i>                 | 1,346,601 | 1,347,494 | +      | 2.4 ± 0.4                     | N-acetylmuramoyl-L-alanine amidase, peptidoglycan hydrolase (PBSX prophage-mediated lysis) |               |
| 5                     | <i>yosJ</i>                 | 2,165,856 | 2,166,050 | -      | 2.4 ± 0.2                     | SP-beta protein                                                                            |               |
|                       | <i>yorZ</i>                 | 2,169,228 | 2,169,440 | -      | 2.5 ± 0.5                     | SP-beta protein                                                                            |               |
|                       | <i>yorW</i>                 | 2,169,969 | 2,170,334 | -      | 2.3 ± 0.1                     | SP-beta protein                                                                            |               |
|                       | <i>yorV</i>                 | 2,170,337 | 2,170,555 | -      | 2.5 ± 0.6                     | SP-beta protein                                                                            |               |
|                       | <i>mtbP</i>                 | 2,170,599 | 2,171,930 | -      | 2.2 ± 0.2                     | modification methylase bsu, SP-beta protein                                                |               |
|                       | <i>yorG</i>                 | 2,183,646 | 2,184,617 | -      | 2.4 ± 0.1                     | SP-beta protein                                                                            |               |
|                       | <i>yorF</i>                 | 2,184,700 | 2,185,614 | -      | 2.5 ± 0.3                     | SP-beta protein                                                                            |               |
| 6                     | <i>yonN</i>                 | 2,224,533 | 2,224,811 | +      | 2.2 ± 0.2                     | histone-like protein, SP-beta protein                                                      |               |
|                       | <i>yonK</i>                 | 2,226,493 | 2,226,684 | +      | 2.6 ± 0.1                     | SP-beta protein                                                                            |               |
|                       | <i>yonJ</i>                 | 2,226,701 | 2,227,918 | +      | 3.0 ± 0.3                     | SP-beta protein                                                                            |               |
|                       | <i>yonH</i>                 | 2,228,581 | 2,229,081 | +      | 2.8 ± 0.5                     | SP-beta protein                                                                            |               |
|                       | <i>yonE</i>                 | 2,231,878 | 2,233,398 | +      | 2.3 ± 0.2                     | SP-beta protein                                                                            |               |
|                       | <i>yonD</i>                 | 2,233,429 | 2,234,865 | +      | 3.8 ± 0.1                     | SP-beta protein                                                                            |               |
|                       | <i>yonC</i>                 | 2,234,890 | 2,235,426 | +      | 3.8 ± 0.6                     | SP-beta protein                                                                            |               |
|                       | <i>yonB</i>                 | 2,235,465 | 2,236,481 | +      | 4.2 ± 0.5                     | SP-beta protein                                                                            |               |
|                       | <i>yonA</i>                 | 2,236,517 | 2,236,987 | +      | 4.2 ± 0.2                     | SP-beta protein                                                                            |               |
|                       | <i>yomZ</i>                 | 2,237,002 | 2,237,397 | +      | 4.5 ± 0.5                     | SP-beta protein                                                                            |               |
|                       | <i>yomY</i>                 | 2,237,394 | 2,237,648 | +      | 4.7 ± 0.3                     | SP-beta protein                                                                            |               |
|                       | <i>yomX</i>                 | 2,237,632 | 2,238,282 | +      | 4.7 ± 0.4                     | SP-beta protein                                                                            |               |
|                       | <i>yomW</i>                 | 2,238,279 | 2,238,785 | +      | 5.2 ± 0.9                     | SP-beta protein                                                                            |               |
|                       | <i>yomV</i>                 | 2,238,782 | 2,239,492 | +      | 4.5 ± 0.6                     | SP-beta protein                                                                            |               |
|                       | <i>yomU</i>                 | 2,239,535 | 2,240,332 | +      | 4.1 ± 0.5                     | SP-beta protein                                                                            |               |
|                       | <i>yomS</i>                 | 2,241,252 | 2,241,608 | +      | 2.9 ± 0.5                     | similar to phage-related lytic exoenzyme, SP-beta protein                                  |               |
|                       | <i>yomR</i>                 | 2,241,610 | 2,242,827 | +      | 3.3 ± 0.8                     | similar to phage-related protein, SP-beta protein                                          |               |
|                       | <i>yomQ</i>                 | 2,242,838 | 2,243,188 | +      | 3.4 ± 0.3                     | SP-beta protein                                                                            |               |
|                       | <i>yomP</i>                 | 2,243,185 | 2,243,376 | +      | 2.9 ± 0.1                     | similar to phage-related protein, SP-beta protein                                          |               |
|                       | <i>yomO</i>                 | 2,243,426 | 2,243,926 | +      | 2.8 ± 0.4                     | SP-beta protein                                                                            |               |
|                       | <i>yomN</i>                 | 2,243,910 | 2,244,329 | +      | 3.2 ± 0.7                     | SP-beta protein                                                                            |               |
|                       | <i>yomM</i>                 | 2,244,343 | 2,245,344 | +      | 2.9 ± 0.6                     | integrase/recombinase, SP-beta protein                                                     |               |
|                       | <i>yomD</i>                 | 2,261,633 | 2,262,457 | +      | 2.3 ± 0.4                     | SP-beta protein                                                                            |               |
| 7                     | <i>tasA</i>                 | 2,552,313 | 2,553,098 | -      | 4.5 ± 1.5                     | major biofilm matrix component                                                             |               |
|                       | <i>sipW</i>                 | 2,553,162 | 2,553,734 | -      | 3.9 ± 0.9                     | type I signal peptidase                                                                    |               |
|                       | <i>tapA</i> ( <i>yqxM</i> ) | 2,553,718 | 2,554,479 | -      | 2.9 ± 0.7                     | lioprotein for biofilm formation                                                           |               |
| 8                     | <i>yqfF</i>                 | 2,647,143 | 2,647,874 | -      | 2.1 ± 0.1                     | unknown                                                                                    |               |
| 9                     | <i>yrhK</i>                 | 2,772,583 | 2,772,873 | +      | 2.5 ± 0.0                     | unknown                                                                                    |               |
| 10                    | <i>epsO</i> ( <i>yvfF</i> ) | 3,513,146 | 3,514,114 | -      | 2.6 ± 0.4                     | putative pyruvyl transferase                                                               |               |
|                       | <i>epsN</i> ( <i>yvfE</i> ) | 3,514,093 | 3,515,259 | -      | 3.0 ± 0.5                     | putative amino transferase                                                                 |               |
|                       | <i>epsM</i> ( <i>yvfD</i> ) | 3,515,264 | 3,515,914 | -      | 2.3 ± 0.3                     | putative O-acetyl transferase                                                              |               |
|                       | <i>epsL</i> ( <i>yvfC</i> ) | 3,515,911 | 3,516,519 | -      | 2.5 ± 0.5                     | putative phosphotransferase involved in extracellular matrix synthesis                     |               |
|                       | <i>epsK</i> ( <i>yvfB</i> ) | 3,516,516 | 3,517,553 | -      | 2.6 ± 0.3                     | putative extracellular matrix component exporter                                           |               |
|                       | <i>epsK</i> ( <i>yvfA</i> ) | 3,517,703 | 3,518,032 | -      | 2.9 ± 0.5                     | putative extracellular matrix component exporter                                           |               |
|                       | <i>epsJ</i> ( <i>yveT</i> ) | 3,518,029 | 3,519,063 | -      | 2.5 ± 0.1                     | putative glycosyl transferase                                                              |               |
|                       | <i>epsI</i> ( <i>yveS</i> ) | 3,519,060 | 3,520,136 | -      | 2.3 ± 0.1                     | putative polysaccharide pyruvyl transferase                                                |               |
|                       | <i>epsG</i> ( <i>yveQ</i> ) | 3,521,200 | 3,522,303 | -      | 2.7 ± 0.3                     | biofilm extracellular matrix formation enzyme                                              |               |
|                       | <i>epsF</i> ( <i>yveP</i> ) | 3,522,300 | 3,523,454 | -      | 2.1 ± 0.1                     | putative phosphotransferase involved in extracellular matrix formation                     |               |
|                       | <i>epsE</i> ( <i>yveO</i> ) | 3,523,447 | 3,524,283 | -      | 2.3 ± 0.5                     | putative glycosyl transferase                                                              |               |
|                       | <i>epsD</i> ( <i>yveN</i> ) | 3,524,280 | 3,525,425 | -      | 2.3 ± 0.3                     | putative extracellular matrix biosynthesis enzyme                                          |               |
|                       | <i>epsB</i> ( <i>yveL</i> ) | 3,527,492 | 3,528,175 | -      | 2.4 ± 0.4                     | protein tyrosine kinase                                                                    |               |
|                       | <i>epsA</i> ( <i>yveK</i> ) | 3,528,181 | 3,528,885 | -      | 2.8 ± 0.8                     | modulator of protein tyrosine kinase EpsB                                                  |               |
| 11                    | <i>tagC</i>                 | 3,682,468 | 3,683,796 | +      | 2.3 ± 0.1                     | teichoic acid biosynthesis protein C                                                       |               |
| 12                    | <i>yxiT</i>                 | 4,006,434 | 4,006,676 | -      | 2.0 ± 0.0                     | unknown                                                                                    |               |
| <b>Down-regulated</b> |                             |           |           |        |                               |                                                                                            |               |
| 1                     | <i>gamP</i>                 | 254,895   | 256,790   | -      | 0.5 ± 0.0                     | PTS glucosamine-specific enzyme IICBA component                                            |               |
| 2                     | <i>ydbN</i>                 | 505,883   | 506,062   | -      | 0.5 ± 0.0                     | unknown                                                                                    |               |
| 3                     | <i>yrhP</i>                 | 2,767,269 | 2,767,901 | -      | 0.4 ± 0.0                     | RhtB subfamily of amino-acid-efflux protein                                                |               |
| 4                     | <i>yurJ</i>                 | 3,344,040 | 3,345,143 | -      | 0.3 ± 0.0                     | similar to multiple sugar transport system ATP-binding protein                             |               |
|                       | <i>yurL</i>                 | 3,346,078 | 3,346,932 | -      | 0.3 ± 0.0                     | probable sugar kinase                                                                      |               |
|                       | <i>yurM</i>                 | 3,346,946 | 3,347,848 | -      | 0.2 ± 0.0                     | multiple sugar transport system permease protein                                           |               |
|                       | <i>yurN</i>                 | 3,347,852 | 3,348,730 | -      | 0.2 ± 0.0                     | multiple sugar transport system permease protein                                           |               |
|                       | <i>yurO</i>                 | 3,348,788 | 3,350,056 | -      | 0.2 ± 0.0                     | multiple sugar transport system substrate-binding protein                                  |               |
|                       | <i>yurP</i>                 | 3,350,137 | 3,351,123 | -      | 0.2 ± 0.0                     | probable phosphosugar isomerases                                                           |               |
| 5                     | <i>yvaB</i>                 | 3,444,472 | 3,445,107 | -      | 0.4 ± 0.0                     | acyl carrier protein phosphodiesterase                                                     |               |
| 6                     | <i>yvbA</i>                 | 3,466,085 | 3,466,357 | -      | 0.4 ± 0.1                     | transcriptional regulator (ArsR family), inducing the atp and yusLKJ operon                |               |
| 7                     | <i>bglH</i>                 | 4,031,364 | 4,032,773 | -      | 0.5 ± 0.0                     | beta-glucosidase                                                                           |               |

<sup>a</sup> Average ratio of transcription signals in 2 independent experiments



**Table S5.** Transcriptome analysis of AbrB, SigD and Spo0A regulons in Veg overexpression cells (pO-veg) compared with its control cells (pO-MCS).

| Regulon      | Gene name    | Location  |           |        | Experiment 1            |           |                   | Experiment 2            |           |                   |
|--------------|--------------|-----------|-----------|--------|-------------------------|-----------|-------------------|-------------------------|-----------|-------------------|
|              |              |           |           |        | Signal intensity of RNA |           | Expression ratio  | Signal intensity of RNA |           | Expression ratio  |
|              |              | start     | end       | strand | pO-veg_01               | pO-MCS_01 | pO-veg /pO-MCS_01 | pO-veg_02               | pO-MCS_02 | pO-veg /pO-MCS_02 |
| AbrB regulon |              |           |           |        |                         |           |                   |                         |           |                   |
|              | <i>ybcO</i>  | 213,926   | 214,093   | +      | 1321                    | 1590      | 0.83              | 1666                    | 2253      | 0.74              |
|              | <i>ybdB</i>  | 217,681   | 219,027   | +      | 286                     | 320       | 0.89              | 370                     | 448       | 0.83              |
|              | <i>ybdD</i>  | 219,074   | 219,487   | +      | 378                     | 425       | 0.89              | 565                     | 627       | 0.90              |
|              | <i>ybdE</i>  | 219,593   | 220,018   | +      | 196                     | 233       | 0.84              | 357                     | 438       | 0.81              |
|              | <i>ybdN</i>  | 224,063   | 224,920   | -      | 676                     | 729       | 0.93              | 735                     | 693       | 1.06              |
|              | <i>ybfO</i>  | 249,967   | 251,307   | +      | 662                     | 543       | 1.22              | 1090                    | 960       | 1.14              |
|              | <i>ybfP</i>  | 251,415   | 252,302   | +      | 220                     | 185       | 1.19              | 407                     | 344       | 1.18              |
|              | <i>lip</i>   | 291,757   | 292,395   | +      | 1120                    | 1088      | 1.03              | 2629                    | 2542      | 1.03              |
|              | <i>ycaA</i>  | 298,990   | 300,054   | -      | 1002                    | 600       | 1.67              | 1244                    | 891       | 1.40              |
|              | <i>amyE</i>  | 327,169   | 329,151   | +      | 230                     | 248       | 0.93              | 214                     | 196       | 1.09              |
|              | <i>yddJ</i>  | 545,156   | 545,536   | +      | 618                     | 487       | 1.27              | 672                     | 464       | 1.45              |
|              | <i>yddT</i>  | 556,306   | 556,992   | +      | 960                     | 933       | 1.03              | 1453                    | 1182      | 1.23              |
|              | <i>ydeH</i>  | 567,206   | 567,652   | +      | 82                      | 70        | 1.17              | 175                     | 185       | 0.94              |
|              | <i>ydeJ</i>  | 568,834   | 569,493   | -      | 379                     | 396       | 0.96              | 373                     | 444       | 0.84              |
|              | <i>ydhM</i>  | 626,169   | 626,480   | +      | 84                      | 87        | 0.97              | 87                      | 96        | 0.91              |
|              | <i>ydhN</i>  | 626,480   | 626,812   | +      | 51                      | 54        | 0.95              | 42                      | 49        | 0.87              |
|              | <i>ydhO</i>  | 626,831   | 628,159   | +      | 73                      | 77        | 0.95              | 65                      | 75        | 0.87              |
|              | <i>ydhP</i>  | 628,177   | 629,574   | +      | 84                      | 88        | 0.95              | 73                      | 84        | 0.86              |
|              | <i>ydhQ</i>  | 629,717   | 630,430   | +      | 188                     | 142       | 1.33              | 139                     | 147       | 0.95              |
|              | <i>ydhR</i>  | 630,459   | 631,358   | +      | 186                     | 156       | 1.19              | 147                     | 159       | 0.92              |
|              | <i>ydhS</i>  | 631,355   | 632,302   | +      | 161                     | 118       | 1.36              | 121                     | 129       | 0.94              |
|              | <i>ydhT</i>  | 632,321   | 633,409   | +      | 150                     | 113       | 1.32              | 116                     | 118       | 0.98              |
|              | <i>pspA</i>  | 670,793   | 671,476   | +      | 1625                    | 1423      | 1.14              | 2698                    | 2563      | 1.05              |
|              | <i>ydjG</i>  | 671,542   | 672,567   | +      | 1108                    | 903       | 1.23              | 2258                    | 2332      | 0.97              |
|              | <i>ydjH</i>  | 672,567   | 673,331   | +      | 1025                    | 808       | 1.27              | 2224                    | 2259      | 0.98              |
|              | <i>ydjI</i>  | 673,362   | 674,333   | +      | 1041                    | 851       | 1.22              | 1929                    | 1939      | 0.99              |
|              | <i>ydjL</i>  | 677,459   | 678,499   | -      | 4727                    | 4574      | 1.03              | 4126                    | 3608      | 1.14              |
|              | <i>yerI</i>  | 724,326   | 725,336   | +      | 1961                    | 1745      | 1.12              | 2165                    | 2138      | 1.01              |
|              | <i>rapH</i>  | 750,293   | 751,588   | +      | 2072                    | 1753      | 1.18              | 2141                    | 1839      | 1.16              |
|              | <i>yfmI</i>  | 818,648   | 819,868   | -      | 114                     | 139       | 0.82              | 155                     | 192       | 0.81              |
|              | <i>yfmG</i>  | 820,204   | 821,667   | +      | 886                     | 847       | 1.05              | 1565                    | 1624      | 0.96              |
|              | <i>yflB</i>  | 843,721   | 843,981   | +      | 158                     | 112       | 1.41              | 125                     | 119       | 1.05              |
|              | <i>yflA</i>  | 844,106   | 845,521   | +      | 3816                    | 3339      | 1.14              | 1528                    | 853       | 1.79              |
|              | <i>glpF</i>  | 1,001,834 | 1,002,658 | +      | 124                     | 151       | 0.82              | 184                     | 240       | 0.77              |
|              | <i>glpK</i>  | 1,002,677 | 1,004,167 | +      | 1526                    | 1300      | 1.17              | 949                     | 706       | 1.34              |
|              | <i>glpD</i>  | 1,004,308 | 1,005,975 | +      | 766                     | 709       | 1.08              | 313                     | 380       | 0.82              |
|              | <i>yhaQ</i>  | 1,061,899 | 1,062,795 | +      | 548                     | 444       | 1.23              | 1128                    | 999       | 1.13              |
|              | <i>yhaP</i>  | 1,062,788 | 1,064,047 | +      | 386                     | 328       | 1.18              | 966                     | 841       | 1.15              |
|              | <i>yhjM</i>  | 1,129,020 | 1,130,009 | +      | 360                     | 324       | 1.11              | 456                     | 562       | 0.81              |
|              | <i>yjcM</i>  | 1,263,014 | 1,264,243 | -      | 1082                    | 1054      | 1.03              | 1521                    | 1923      | 0.79              |
|              | <i>yjdB</i>  | 1,269,045 | 1,269,392 | -      | 244                     | 180       | 1.36              | 173                     | 147       | 1.17              |
|              | <i>yjdG</i>  | 1,275,650 | 1,276,156 | -      | 376                     | 369       | 1.02              | 339                     | 403       | 0.84              |
|              | <i>ctaO</i>  | 1,278,825 | 1,279,814 | -      | 345                     | 264       | 1.31              | 226                     | 326       | 0.69              |
|              | <i>spo0E</i> | 1,429,992 | 1,430,249 | +      | 1618                    | 1898      | 0.85              | 1240                    | 1093      | 1.13              |
|              | <i>ykuA</i>  | 1,467,109 | 1,469,166 | +      | 586                     | 654       | 0.90              | 553                     | 698       | 0.79              |
|              | <i>ykuU</i>  | 1,491,568 | 1,492,110 | +      | 1367                    | 1224      | 1.12              | 1688                    | 1440      | 1.17              |
|              | <i>ykuV</i>  | 1,492,182 | 1,492,643 | +      | 604                     | 526       | 1.15              | 816                     | 717       | 1.14              |
|              | <i>yknW</i>  | 1,502,889 | 1,503,584 | +      | 2537                    | 2495      | 1.02              | 3192                    | 3238      | 0.99              |
|              | <i>yknX</i>  | 1,503,589 | 1,504,722 | +      | 1073                    | 1064      | 1.01              | 2759                    | 3093      | 0.89              |
|              | <i>yknY</i>  | 1,504,723 | 1,505,415 | +      | 1018                    | 1013      | 1.01              | 2580                    | 2653      | 0.97              |
|              | <i>yknZ</i>  | 1,505,412 | 1,506,605 | +      | 1066                    | 1053      | 1.01              | 2303                    | 2400      | 0.96              |
|              | <i>nprE</i>  | 1,539,343 | 1,540,908 | -      | 149                     | 149       | 1.00              | 201                     | 224       | 0.90              |
|              | <i>ylaE</i>  | 1,544,243 | 1,544,854 | -      | 332                     | 441       | 0.75              | 287                     | 365       | 0.79              |
|              | <i>ctaC</i>  | 1,559,773 | 1,560,843 | +      | 777                     | 1176      | 0.66              | 513                     | 807       | 0.64              |
|              | <i>ctaD</i>  | 1,560,876 | 1,562,744 | +      | 704                     | 1118      | 0.63              | 521                     | 805       | 0.65              |
|              | <i>ctaE</i>  | 1,562,744 | 1,563,367 | +      | 551                     | 949       | 0.58              | 463                     | 738       | 0.63              |
|              | <i>ctaF</i>  | 1,563,370 | 1,563,702 | +      | 535                     | 861       | 0.62              | 367                     | 681       | 0.54              |
|              | <i>ctaG</i>  | 1,563,729 | 1,564,622 | +      | 322                     | 556       | 0.58              | 274                     | 434       | 0.63              |
|              | <i>ylbA</i>  | 1,564,654 | 1,565,016 | -      | 1156                    | 1603      | 0.72              | 1233                    | 1640      | 0.75              |
|              | <i>sigG</i>  | 1,604,927 | 1,605,709 | +      | 51                      | 55        | 0.92              | 57                      | 71        | 0.80              |
|              | <i>ymzB</i>  | 1,859,209 | 1,859,565 | -      | 831                     | 578       | 1.44              | 677                     | 446       | 1.52              |
|              | <i>ymaE</i>  | 1,859,644 | 1,860,342 | -      | 409                     | 391       | 1.05              | 695                     | 581       | 1.20              |
|              | <i>yncM</i>  | 1,902,720 | 1,903,472 | -      | 1302                    | 1444      | 0.90              | 1213                    | 1276      | 0.95              |
|              | <i>ynzD</i>  | 1,922,050 | 1,922,223 | -      | 136                     | 123       | 1.11              | 262                     | 307       | 0.86              |
|              | <i>ynfF</i>  | 1,941,923 | 1,943,191 | -      | 349                     | 251       | 1.39              | 383                     | 298       | 1.29              |
|              | <i>xynD</i>  | 1,943,322 | 1,944,863 | -      | 252                     | 180       | 1.40              | 312                     | 265       | 1.18              |
|              | <i>ppsE</i>  | 1,959,407 | 1,963,246 | -      | 376                     | 406       | 0.93              | 408                     | 419       | 0.97              |
|              | <i>ppsD</i>  | 1,963,254 | 1,974,065 | -      | 459                     | 495       | 0.93              | 462                     | 472       | 0.98              |
|              | <i>ppsC</i>  | 1,974,090 | 1,981,757 | -      | 490                     | 534       | 0.92              | 494                     | 519       | 0.95              |
|              | <i>ppsB</i>  | 1,981,774 | 1,989,456 | -      | 272                     | 305       | 0.89              | 329                     | 366       | 0.90              |
|              | <i>ppsA</i>  | 1,989,481 | 1,997,166 | -      | 417                     | 437       | 0.95              | 389                     | 432       | 0.90              |
|              | <i>yobB</i>  | 2,049,899 | 2,050,162 | +      | 99                      | 118       | 0.83              | 115                     | 139       | 0.83              |
|              | <i>rapK</i>  | 2,061,361 | 2,062,476 | +      | 495                     | 434       | 1.14              | 751                     | 864       | 0.87              |
|              | <i>yobO</i>  | 2,075,417 | 2,077,837 | +      | 178                     | 186       | 0.96              | 171                     | 151       | 1.14              |

|                |           |           |   |      |      |      |      |      |      |
|----------------|-----------|-----------|---|------|------|------|------|------|------|
| <i>yocD</i>    | 2,087,468 | 2,088,445 | + | 318  | 338  | 0.94 | 490  | 515  | 0.95 |
| <i>yojL</i>    | 2,114,627 | 2,115,871 | - | 1157 | 1358 | 0.85 | 1574 | 2013 | 0.78 |
| <i>phy</i>     | 2,149,306 | 2,150,454 | - | 71   | 63   | 1.13 | 70   | 64   | 1.08 |
| <i>yorD</i>    | 2,186,181 | 2,186,495 | - | 1394 | 1469 | 0.95 | 1864 | 2305 | 0.81 |
| <i>yoqM</i>    | 2,195,182 | 2,195,460 | + | 299  | 268  | 1.12 | 171  | 151  | 1.13 |
| <i>yomJ</i>    | 2,247,613 | 2,248,296 | + | 1201 | 1211 | 0.99 | 942  | 1070 | 0.88 |
| <i>bdbB</i>    | 2,264,421 | 2,264,867 | - | 189  | 200  | 0.95 | 396  | 480  | 0.83 |
| <i>yolJ</i>    | 2,264,864 | 2,266,132 | - | 500  | 372  | 1.35 | 673  | 816  | 0.83 |
| <i>bdbA</i>    | 2,266,132 | 2,266,545 | - | 302  | 179  | 1.68 | 387  | 550  | 0.70 |
| <i>sunT</i>    | 2,266,542 | 2,268,659 | - | 262  | 172  | 1.53 | 394  | 523  | 0.75 |
| <i>sunA</i>    | 2,268,717 | 2,268,887 | - | 4302 | 4131 | 1.04 | 6893 | 5382 | 1.28 |
| <i>yolC</i>    | 2,271,352 | 2,271,687 | + | 188  | 188  | 1.00 | 221  | 245  | 0.90 |
| <i>yolB</i>    | 2,271,730 | 2,272,086 | - | 1621 | 1920 | 0.84 | 1604 | 1822 | 0.88 |
| <i>yolA</i>    | 2,272,092 | 2,272,559 | - | 4304 | 4869 | 0.88 | 3786 | 4257 | 0.89 |
| <i>yokL</i>    | 2,273,185 | 2,273,718 | - | 249  | 207  | 1.20 | 375  | 421  | 0.89 |
| <i>yokK</i>    | 2,273,754 | 2,274,332 | - | 378  | 302  | 1.25 | 553  | 592  | 0.93 |
| <i>yokJ</i>    | 2,274,396 | 2,274,893 | - | 419  | 360  | 1.16 | 683  | 789  | 0.87 |
| <i>yokI</i>    | 2,274,902 | 2,276,617 | - | 488  | 428  | 1.14 | 723  | 865  | 0.84 |
| <i>yphF</i>    | 2,387,051 | 2,387,785 | - | 418  | 496  | 0.84 | 581  | 745  | 0.78 |
| <i>yphE</i>    | 2,387,807 | 2,388,010 | - | 590  | 658  | 0.90 | 821  | 1018 | 0.81 |
| <i>sigF</i>    | 2,442,618 | 2,443,385 | - | 325  | 350  | 0.93 | 273  | 298  | 0.92 |
| <i>spollAB</i> | 2,443,397 | 2,443,837 | - | 336  | 369  | 0.91 | 280  | 287  | 0.97 |
| <i>spollAA</i> | 2,443,834 | 2,444,187 | - | 495  | 575  | 0.86 | 448  | 436  | 1.03 |
| <i>dacF</i>    | 2,444,283 | 2,445,452 | - | 67   | 70   | 0.95 | 54   | 66   | 0.82 |
| <i>tasA</i>    | 2,552,313 | 2,553,098 | - | 2398 | 427  | 5.61 | 2500 | 719  | 3.48 |
| <i>sipW</i>    | 2,553,162 | 2,553,734 | - | 612  | 134  | 4.56 | 483  | 148  | 3.26 |
| <i>yqxM</i>    | 2,553,718 | 2,554,479 | - | 197  | 58   | 3.40 | 159  | 66   | 2.41 |
| <i>yqzG</i>    | 2,554,751 | 2,555,077 | + | 40   | 42   | 0.94 | 53   | 46   | 1.17 |
| <i>cccA</i>    | 2,598,756 | 2,599,118 | - | 909  | 963  | 0.94 | 792  | 877  | 0.90 |
| <i>antE</i>    | 2,602,212 | 2,602,508 | + | 78   | 76   | 1.03 | 78   | 102  | 0.76 |
| <i>yqcG</i>    | 2,660,329 | 2,661,924 | + | 625  | 512  | 1.22 | 726  | 704  | 1.03 |
| <i>yqxJ</i>    | 2,662,778 | 2,663,140 | - | 602  | 533  | 1.13 | 759  | 627  | 1.21 |
| <i>yqxI</i>    | 2,663,156 | 2,663,635 | - | 1572 | 1362 | 1.15 | 1633 | 1391 | 1.17 |
| <i>yqaP</i>    | 2,690,868 | 2,691,797 | + | 2016 | 1885 | 1.07 | 2069 | 2094 | 0.99 |
| <i>yrrD</i>    | 2,738,712 | 2,739,419 | + | 2048 | 2392 | 0.86 | 2447 | 2605 | 0.94 |
| <i>csn</i>     | 2,747,210 | 2,748,043 | - | 1434 | 1088 | 1.32 | 1082 | 878  | 1.23 |
| <i>yrzI</i>    | 2,778,150 | 2,778,299 | - | 1688 | 2162 | 0.78 | 732  | 847  | 0.86 |
| <i>yuaB</i>    | 3,186,542 | 3,187,087 | + | 542  | 398  | 1.36 | 705  | 533  | 1.32 |
| <i>dhbF</i>    | 3,279,544 | 3,286,680 | - | 457  | 671  | 0.68 | 289  | 429  | 0.67 |
| <i>dhbB</i>    | 3,286,700 | 3,287,638 | - | 362  | 526  | 0.69 | 215  | 362  | 0.60 |
| <i>dhbE</i>    | 3,287,666 | 3,289,285 | - | 336  | 427  | 0.79 | 200  | 322  | 0.62 |
| <i>dhbC</i>    | 3,289,314 | 3,290,510 | - | 468  | 557  | 0.84 | 228  | 375  | 0.61 |
| <i>dhbA</i>    | 3,290,536 | 3,291,321 | - | 452  | 506  | 0.89 | 212  | 358  | 0.59 |
| <i>yuil</i>    | 3,291,515 | 3,292,459 | - | 738  | 689  | 1.07 | 428  | 594  | 0.72 |
| <i>yurI</i>    | 3,343,140 | 3,344,006 | + | 336  | 329  | 1.02 | 304  | 337  | 0.90 |
| <i>yvqJ</i>    | 3,398,118 | 3,399,386 | - | 297  | 289  | 1.03 | 323  | 305  | 1.06 |
| <i>yvrN</i>    | 3,411,158 | 3,412,408 | - | 908  | 801  | 1.13 | 1214 | 1279 | 0.95 |
| <i>yvrO</i>    | 3,412,380 | 3,413,069 | - | 1081 | 979  | 1.10 | 1499 | 1674 | 0.90 |
| <i>yvrP</i>    | 3,413,053 | 3,414,246 | - | 912  | 1028 | 0.89 | 1198 | 1517 | 0.79 |
| <i>yvgO</i>    | 3,426,832 | 3,427,317 | + | 4318 | 2901 | 1.49 | 2800 | 1150 | 2.43 |
| <i>yvaW</i>    | 3,463,320 | 3,463,796 | + | 497  | 550  | 0.90 | 1158 | 1926 | 0.60 |
| <i>yvfF</i>    | 3,513,146 | 3,514,114 | - | 380  | 133  | 2.87 | 337  | 150  | 2.25 |
| <i>yvfE</i>    | 3,514,093 | 3,515,259 | - | 507  | 150  | 3.38 | 478  | 183  | 2.62 |
| <i>yvfD</i>    | 3,515,264 | 3,515,914 | - | 384  | 154  | 2.49 | 335  | 163  | 2.05 |
| <i>yvfC</i>    | 3,515,911 | 3,516,519 | - | 387  | 135  | 2.86 | 363  | 173  | 2.10 |
| <i>yvfB</i>    | 3,516,516 | 3,517,553 | - | 333  | 119  | 2.80 | 330  | 135  | 2.44 |
| <i>yvfA</i>    | 3,517,703 | 3,518,032 | - | 289  | 87   | 3.31 | 300  | 118  | 2.55 |
| <i>yveT</i>    | 3,518,029 | 3,519,063 | - | 476  | 186  | 2.55 | 524  | 217  | 2.41 |
| <i>yveS</i>    | 3,519,060 | 3,520,136 | - | 334  | 139  | 2.40 | 359  | 157  | 2.28 |
| <i>yveR</i>    | 3,520,141 | 3,521,175 | - | 351  | 190  | 1.85 | 494  | 227  | 2.17 |
| <i>yveQ</i>    | 3,521,200 | 3,522,303 | - | 252  | 87   | 2.90 | 314  | 125  | 2.51 |
| <i>yveP</i>    | 3,522,300 | 3,523,454 | - | 228  | 102  | 2.25 | 258  | 126  | 2.05 |
| <i>yveO</i>    | 3,523,447 | 3,524,283 | - | 294  | 111  | 2.66 | 321  | 159  | 2.01 |
| <i>yveN</i>    | 3,524,280 | 3,525,425 | - | 435  | 177  | 2.45 | 455  | 219  | 2.07 |
| <i>yveM</i>    | 3,525,437 | 3,527,233 | - | 384  | 192  | 2.00 | 317  | 184  | 1.73 |
| <i>yveL</i>    | 3,527,492 | 3,528,175 | - | 317  | 119  | 2.67 | 287  | 134  | 2.15 |
| <i>yveK</i>    | 3,528,181 | 3,528,885 | - | 423  | 126  | 3.36 | 376  | 171  | 2.20 |
| <i>pnbA</i>    | 3,529,665 | 3,531,134 | + | 558  | 390  | 1.43 | 944  | 804  | 1.17 |
| <i>yvnA</i>    | 3,601,104 | 3,601,577 | + | 294  | 252  | 1.17 | 261  | 312  | 0.83 |
| <i>cypX</i>    | 3,601,618 | 3,602,835 | - | 255  | 228  | 1.12 | 243  | 244  | 1.00 |
| <i>yvmC</i>    | 3,602,851 | 3,603,597 | - | 361  | 318  | 1.14 | 408  | 386  | 1.06 |
| <i>rbsR</i>    | 3,700,438 | 3,701,418 | + | 206  | 206  | 1.00 | 244  | 296  | 0.83 |
| <i>rbsK</i>    | 3,701,420 | 3,702,301 | + | 190  | 219  | 0.87 | 256  | 329  | 0.78 |
| <i>rbsD</i>    | 3,702,298 | 3,702,693 | + | 71   | 99   | 0.72 | 126  | 153  | 0.83 |
| <i>rbsA</i>    | 3,702,709 | 3,704,190 | + | 120  | 161  | 0.75 | 163  | 221  | 0.74 |
| <i>rbsC</i>    | 3,704,192 | 3,705,160 | + | 90   | 124  | 0.73 | 91   | 131  | 0.70 |
| <i>rbsB</i>    | 3,705,172 | 3,706,089 | + | 216  | 279  | 0.77 | 208  | 290  | 0.72 |
| <i>ywqE</i>    | 3,730,032 | 3,730,796 | - | 113  | 97   | 1.17 | 160  | 147  | 1.09 |
| <i>ywqD</i>    | 3,730,849 | 3,731,562 | - | 336  | 270  | 1.24 | 497  | 526  | 0.94 |
| <i>ywqC</i>    | 3,731,552 | 3,732,298 | - | 215  | 226  | 0.95 | 377  | 427  | 0.88 |

|             |           |           |   |      |      |      |      |      |      |
|-------------|-----------|-----------|---|------|------|------|------|------|------|
| <i>ywoF</i> | 3,749,790 | 3,751,196 | - | 614  | 507  | 1.21 | 756  | 798  | 0.95 |
| <i>albA</i> | 3,835,346 | 3,836,692 | + | 3725 | 2918 | 1.28 | 2366 | 1962 | 1.21 |
| <i>albB</i> | 3,836,705 | 3,836,866 | + | 3153 | 2377 | 1.33 | 1724 | 1474 | 1.17 |
| <i>albC</i> | 3,836,863 | 3,837,582 | + | 2003 | 1173 | 1.71 | 1017 | 911  | 1.12 |
| <i>albD</i> | 3,837,575 | 3,838,885 | + | 1512 | 869  | 1.74 | 710  | 670  | 1.06 |
| <i>albE</i> | 3,838,875 | 3,840,035 | + | 1139 | 656  | 1.74 | 498  | 476  | 1.05 |
| <i>albF</i> | 3,840,040 | 3,841,320 | + | 900  | 587  | 1.53 | 372  | 372  | 1.00 |
| <i>albG</i> | 3,841,317 | 3,842,018 | + | 417  | 282  | 1.48 | 149  | 155  | 0.96 |
| <i>rocA</i> | 3,877,988 | 3,879,535 | - | 448  | 939  | 0.48 | 305  | 434  | 0.70 |
| <i>rocG</i> | 3,879,762 | 3,881,036 | - | 310  | 418  | 0.74 | 281  | 351  | 0.80 |
| <i>yweA</i> | 3,881,213 | 3,881,677 | - | 2653 | 3230 | 0.82 | 2078 | 2278 | 0.91 |
| <i>ywbF</i> | 3,933,380 | 3,934,579 | + | 294  | 287  | 1.02 | 391  | 396  | 0.99 |
| <i>yxzE</i> | 3,981,992 | 3,982,192 | + | 382  | 406  | 0.94 | 732  | 671  | 1.09 |
| <i>yxxD</i> | 4,065,225 | 4,065,578 | + | 29   | 39   | 0.75 | 26   | 29   | 0.90 |
| <i>yxbD</i> | 4,094,376 | 4,094,855 | - | 271  | 268  | 1.01 | 716  | 807  | 0.89 |
| <i>yxbC</i> | 4,094,935 | 4,095,927 | - | 1807 | 2140 | 0.84 | 1970 | 2156 | 0.91 |
| <i>yxbB</i> | 4,096,436 | 4,097,170 | + | 2055 | 2437 | 0.84 | 2289 | 2715 | 0.84 |
| <i>yxbA</i> | 4,097,170 | 4,097,439 | + | 1481 | 1801 | 0.82 | 1875 | 2153 | 0.87 |
| <i>yxnB</i> | 4,097,443 | 4,097,925 | + | 1257 | 1580 | 0.80 | 1606 | 2019 | 0.80 |
| <i>yxaL</i> | 4,101,449 | 4,102,681 | - | 1357 | 1021 | 1.33 | 965  | 853  | 1.13 |
| <i>yxaJ</i> | 4,102,782 | 4,103,210 | - | 438  | 336  | 1.30 | 642  | 571  | 1.12 |
| <i>yxaB</i> | 4,109,973 | 4,111,004 | - | 1142 | 732  | 1.56 | 784  | 362  | 2.17 |
| <i>yxaA</i> | 4,111,097 | 4,112,245 | - | 235  | 187  | 1.26 | 280  | 233  | 1.20 |
| <i>gntR</i> | 4,112,441 | 4,113,172 | + | 220  | 200  | 1.10 | 553  | 375  | 1.48 |
| <i>gntK</i> | 4,113,165 | 4,114,706 | + | 282  | 254  | 1.11 | 313  | 282  | 1.11 |
| <i>gntP</i> | 4,114,735 | 4,116,081 | + | 280  | 223  | 1.26 | 338  | 315  | 1.07 |
| <i>gntZ</i> | 4,116,104 | 4,117,510 | + | 453  | 326  | 1.39 | 775  | 683  | 1.13 |
| <i>yydJ</i> | 4,123,244 | 4,123,966 | - | 487  | 457  | 1.06 | 888  | 1144 | 0.78 |
| <i>yydI</i> | 4,123,987 | 4,124,616 | - | 975  | 919  | 1.06 | 1386 | 1776 | 0.78 |
| <i>yydH</i> | 4,124,766 | 4,125,524 | - | 489  | 458  | 1.07 | 1012 | 1390 | 0.73 |
| <i>yydG</i> | 4,125,505 | 4,126,464 | - | 291  | 263  | 1.11 | 1064 | 1471 | 0.72 |

#### SigD regulon

|             |           |           |   |       |       |      |      |      |      |
|-------------|-----------|-----------|---|-------|-------|------|------|------|------|
| <i>yjbJ</i> | 1,234,475 | 1,235,020 | - | 1142  | 1787  | 0.64 | 1024 | 1300 | 0.79 |
| <i>yjcP</i> | 1,265,926 | 1,266,429 | + | 935   | 940   | 0.99 | 1116 | 1129 | 0.99 |
| <i>yjfB</i> | 1,282,480 | 1,282,647 | - | 4138  | 3845  | 1.08 | 3276 | 2517 | 1.30 |
| <i>motA</i> | 1,433,741 | 1,434,553 | - | 2757  | 3447  | 0.80 | 1657 | 1826 | 0.91 |
| <i>mcpC</i> | 1,462,936 | 1,464,900 | + | 2428  | 2795  | 0.87 | 1576 | 1847 | 0.85 |
| <i>cheV</i> | 1,472,906 | 1,473,817 | + | 1075  | 1721  | 0.62 | 840  | 1273 | 0.66 |
| <i>flgB</i> | 1,690,578 | 1,690,967 | + | 1485  | 1645  | 0.90 | 1124 | 1408 | 0.80 |
| <i>yoaH</i> | 2,028,640 | 2,030,244 | - | 636   | 747   | 0.85 | 509  | 473  | 1.08 |
| <i>degR</i> | 2,307,354 | 2,307,536 | - | 438   | 388   | 1.13 | 609  | 466  | 1.31 |
| <i>sigA</i> | 2,599,447 | 2,600,562 | - | 2316  | 2484  | 0.93 | 2541 | 2689 | 0.95 |
| <i>tlpB</i> | 3,203,106 | 3,205,094 | - | 906   | 678   | 1.34 | 853  | 544  | 1.57 |
| <i>mcpA</i> | 3,205,208 | 3,207,193 | - | 2341  | 2982  | 0.79 | 1699 | 1948 | 0.87 |
| <i>mcpB</i> | 3,209,484 | 3,211,472 | - | 2298  | 2752  | 0.84 | 1389 | 1540 | 0.90 |
| <i>yvyC</i> | 3,633,455 | 3,633,784 | - | 1471  | 1655  | 0.89 | 1101 | 1191 | 0.92 |
| <i>hag</i>  | 3,634,017 | 3,634,931 | - | 10338 | 11309 | 0.91 | 8218 | 7537 | 1.09 |
| <i>yvyF</i> | 3,639,662 | 3,640,081 | - | 1930  | 2997  | 0.64 | 1537 | 2178 | 0.71 |
| <i>lytA</i> | 3,661,819 | 3,662,127 | - | 1981  | 2243  | 0.88 | 1864 | 2299 | 0.81 |
| <i>lytD</i> | 3,683,856 | 3,686,498 | - | 1722  | 1710  | 1.01 | 1452 | 1413 | 1.03 |
| <i>nfrA</i> | 3,910,500 | 3,911,249 | - | 1010  | 995   | 1.01 | 989  | 818  | 1.21 |
| <i>epr</i>  | 3,938,890 | 3,940,827 | + | 2588  | 2029  | 1.28 | 1983 | 1706 | 1.16 |
| <i>dlrA</i> | 3,951,296 | 3,952,807 | + | 1883  | 1592  | 1.18 | 2538 | 2331 | 1.09 |
| <i>yxkC</i> | 3,988,251 | 3,988,892 | + | 4082  | 4454  | 0.92 | 4279 | 4278 | 1.00 |

#### Spo0A regulon

|               |           |           |   |      |      |      |      |      |      |
|---------------|-----------|-----------|---|------|------|------|------|------|------|
| <i>dnaA</i>   | 410       | 1,750     | + | 742  | 591  | 1.26 | 918  | 1159 | 0.79 |
| <i>yaaD</i>   | 19,060    | 19,944    | + | 3198 | 2739 | 1.17 | 3257 | 3347 | 0.97 |
| <i>abrB</i>   | 44,846    | 45,136    | - | 2790 | 3430 | 0.81 | 1529 | 1682 | 0.91 |
| <i>metS</i>   | 45,631    | 47,625    | + | 902  | 897  | 1.00 | 1312 | 1453 | 0.90 |
| <i>veg</i>    | 52,761    | 53,021    | + | 9229 | 3266 | 2.83 | 8854 | 2773 | 3.19 |
| <i>spoIIE</i> | 70,536    | 73,019    | + | 146  | 111  | 1.31 | 100  | 88   | 1.14 |
| <i>ybcO</i>   | 213,926   | 214,093   | + | 1321 | 1590 | 0.83 | 1666 | 2253 | 0.74 |
| <i>ycgM</i>   | 344,111   | 345,022   | + | 121  | 140  | 0.86 | 200  | 191  | 1.05 |
| <i>yerB</i>   | 714,772   | 715,767   | + | 1315 | 1417 | 0.93 | 1752 | 1941 | 0.90 |
| <i>yfmI</i>   | 818,648   | 819,868   | - | 114  | 139  | 0.82 | 155  | 192  | 0.81 |
| <i>ygaO</i>   | 965,533   | 966,006   | - | 312  | 294  | 1.06 | 320  | 268  | 1.20 |
| <i>lytE</i>   | 1,018,280 | 1,019,311 | + | 1099 | 866  | 1.27 | 1316 | 1644 | 0.80 |
| <i>comK</i>   | 1,116,413 | 1,116,991 | + | 670  | 733  | 0.91 | 978  | 1204 | 0.81 |
| <i>med</i>    | 1,205,937 | 1,206,890 | + | 873  | 828  | 1.05 | 616  | 570  | 1.08 |
| <i>yjcP</i>   | 1,265,926 | 1,266,429 | + | 935  | 940  | 0.99 | 1116 | 1129 | 0.99 |
| <i>rapA</i>   | 1,315,179 | 1,316,315 | + | 4045 | 5313 | 0.76 | 2750 | 3115 | 0.88 |
| <i>ykaA</i>   | 1,349,793 | 1,350,410 | - | 1207 | 1129 | 1.07 | 1174 | 1188 | 0.99 |
| <i>kinA</i>   | 1,469,330 | 1,471,150 | + | 299  | 297  | 1.01 | 297  | 339  | 0.88 |
| <i>ykfF</i>   | 1,484,424 | 1,484,621 | + | 2185 | 2345 | 0.93 | 3142 | 3377 | 0.93 |
| <i>ykuL</i>   | 1,484,759 | 1,485,202 | + | 312  | 336  | 0.93 | 341  | 314  | 1.09 |
| <i>ykuV</i>   | 1,492,182 | 1,492,643 | + | 604  | 526  | 1.15 | 816  | 717  | 1.14 |
| <i>rok</i>    | 1,493,094 | 1,493,669 | + | 307  | 330  | 0.93 | 488  | 607  | 0.80 |
| <i>fruR</i>   | 1,506,885 | 1,507,640 | + | 801  | 934  | 0.86 | 560  | 388  | 1.44 |

|                 |           |           |   |      |      |      |      |      |      |
|-----------------|-----------|-----------|---|------|------|------|------|------|------|
| <i>kinC</i>     | 1,517,640 | 1,518,926 | + | 564  | 490  | 1.15 | 681  | 675  | 1.01 |
| <i>spoII GA</i> | 1,603,076 | 1,604,005 | + | 39   | 41   | 0.96 | 43   | 49   | 0.89 |
| <i>ylmD</i>     | 1,608,624 | 1,609,460 | + | 1686 | 1521 | 1.11 | 1787 | 1751 | 1.02 |
| <i>divIVA</i>   | 1,611,824 | 1,612,318 | + | 939  | 926  | 1.01 | 1527 | 1795 | 0.85 |
| <i>flgB</i>     | 1,690,578 | 1,690,967 | + | 1485 | 1645 | 0.90 | 1124 | 1408 | 0.80 |
| <i>tki</i>      | 1,919,070 | 1,921,073 | + | 1791 | 1747 | 1.02 | 2316 | 2302 | 1.01 |
| <i>yneE</i>     | 1,921,226 | 1,921,672 | + | 65   | 82   | 0.80 | 77   | 85   | 0.91 |
| <i>yocH</i>     | 2,092,110 | 2,092,973 | - | 2335 | 1673 | 1.40 | 3901 | 3488 | 1.12 |
| <i>cotD</i>     | 2,331,981 | 2,332,208 | - | 1096 | 740  | 1.48 | 1081 | 958  | 1.13 |
| <i>yppF</i>     | 2,337,779 | 2,337,967 | + | 162  | 222  | 0.73 | 104  | 158  | 0.66 |
| <i>yppD</i>     | 2,338,423 | 2,338,668 | - | 45   | 50   | 0.90 | 42   | 52   | 0.79 |
| <i>spoII AA</i> | 2,443,834 | 2,444,187 | - | 495  | 575  | 0.86 | 448  | 436  | 1.03 |
| <i>spoOA</i>    | 2,517,257 | 2,518,060 | - | 924  | 805  | 1.15 | 859  | 889  | 0.97 |
| <i>sinI</i>     | 2,551,678 | 2,551,851 | + | 351  | 310  | 1.13 | 376  | 567  | 0.66 |
| <i>yqzD</i>     | 2,575,599 | 2,575,952 | + | 1783 | 1470 | 1.21 | 1933 | 1805 | 1.07 |
| <i>dnaG</i>     | 2,600,761 | 2,602,572 | - | 1192 | 1257 | 0.95 | 1405 | 1692 | 0.83 |
| <i>era</i>      | 2,609,274 | 2,610,179 | - | 1565 | 1383 | 1.13 | 1898 | 2016 | 0.94 |
| <i>yqcG</i>     | 2,660,329 | 2,661,924 | + | 625  | 512  | 1.22 | 726  | 704  | 1.03 |
| <i>yqxI</i>     | 2,663,156 | 2,663,635 | - | 1572 | 1362 | 1.15 | 1633 | 1391 | 1.17 |
| <i>yrrL</i>     | 2,795,114 | 2,796,196 | - | 692  | 544  | 1.27 | 976  | 805  | 1.21 |
| <i>accD</i>     | 2,987,732 | 2,988,520 | - | 1607 | 1573 | 1.02 | 2284 | 2377 | 0.96 |
| <i>yttP</i>     | 3,031,460 | 3,032,083 | - | 59   | 68   | 0.86 | 66   | 78   | 0.85 |
| <i>yusE</i>     | 3,364,096 | 3,364,416 | - | 260  | 238  | 1.09 | 301  | 301  | 1.00 |
| <i>yvaW</i>     | 3,463,320 | 3,463,796 | + | 497  | 550  | 0.90 | 1158 | 1926 | 0.60 |
| <i>ftsE</i>     | 3,623,851 | 3,624,537 | - | 1142 | 898  | 1.27 | 1345 | 1449 | 0.93 |
| <i>yvyD</i>     | 3,630,033 | 3,630,602 | - | 6016 | 6920 | 0.87 | 4101 | 3652 | 1.12 |
| <i>yvyE</i>     | 3,645,783 | 3,646,436 | + | 469  | 431  | 1.09 | 599  | 716  | 0.84 |
| <i>ywqC</i>     | 3,731,552 | 3,732,298 | - | 215  | 226  | 0.95 | 377  | 427  | 0.88 |
| <i>spoIID</i>   | 3,775,745 | 3,776,776 | - | 190  | 194  | 0.98 | 133  | 136  | 0.98 |
| <i>ywkC</i>     | 3,797,812 | 3,798,366 | + | 433  | 429  | 1.01 | 544  | 480  | 1.13 |
| <i>spoOF</i>    | 3,808,573 | 3,808,947 | - | 742  | 740  | 1.00 | 604  | 811  | 0.75 |
| <i>rocG</i>     | 3,879,762 | 3,881,036 | - | 310  | 418  | 0.74 | 281  | 351  | 0.80 |
| <i>ywcH</i>     | 3,909,325 | 3,910,326 | - | 187  | 172  | 1.09 | 176  | 156  | 1.12 |
| <i>nfrA</i>     | 3,910,500 | 3,911,249 | - | 1010 | 995  | 1.01 | 989  | 818  | 1.21 |
| <i>dltA</i>     | 3,951,296 | 3,952,807 | + | 1883 | 1592 | 1.18 | 2538 | 2331 | 1.09 |
| <i>yxbC</i>     | 4,094,935 | 4,095,927 | - | 1807 | 2140 | 0.84 | 1970 | 2156 | 0.91 |
| <i>rocR</i>     | 4,144,771 | 4,146,156 | + | 172  | 166  | 1.03 | 237  | 277  | 0.86 |
| <i>soj</i>      | 4,205,421 | 4,206,182 | - | 1343 | 1173 | 1.14 | 1282 | 1223 | 1.05 |

**Table S6.** Transcriptome analysis in Veg overexpression cells (pO-veg) compared with its control cells (pO-MCS).

| Gene name     | Location |         |        | Experiment 1            |           |                   | Experiment 2            |           |                   | Description <sup>a</sup> |
|---------------|----------|---------|--------|-------------------------|-----------|-------------------|-------------------------|-----------|-------------------|--------------------------|
|               |          |         |        | Signal intensity of RNA |           | Expression ratio  | Signal intensity of RNA |           | Expression ratio  |                          |
|               | start    | end     | strand | pO-veg_01               | pO-MCS_01 | pO-veg /pO-MCS_01 | pO-veg_02               | pO-MCS_02 | pO-veg /pO-MCS_02 |                          |
| <i>dnaA</i>   | 410      | 1,750   | +      | 742                     | 591       | 1.26              | 918                     | 1159      | 0.79              | Spo0A regulon            |
| <i>dnaN</i>   | 1,939    | 3,075   | +      | 398                     | 279       | 1.43              | 687                     | 729       | 0.94              |                          |
| <i>yaaA</i>   | 3,206    | 3,421   | +      | 699                     | 674       | 1.04              | 783                     | 987       | 0.79              |                          |
| <i>recF</i>   | 3,437    | 4,549   | +      | 1411                    | 1196      | 1.18              | 1214                    | 1378      | 0.88              |                          |
| <i>yaaB</i>   | 4,567    | 4,725   | +      | 1585                    | 1301      | 1.22              | 1414                    | 1552      | 0.91              |                          |
| <i>gyrB</i>   | 4,866    | 6,782   | +      | 1781                    | 1592      | 1.12              | 2161                    | 2257      | 0.96              |                          |
| <i>gyrA</i>   | 6,993    | 9,458   | +      | 1528                    | 1250      | 1.22              | 1910                    | 1940      | 0.99              |                          |
| <i>yaaC</i>   | 14,845   | 15,792  | -      | 51                      | 37        | 1.39              | 30                      | 30        | 0.98              |                          |
| <i>guaB</i>   | 15,913   | 17,379  | +      | 1622                    | 1676      | 0.97              | 2065                    | 2079      | 0.99              |                          |
| <i>dacA</i>   | 17,532   | 18,863  | +      | 815                     | 730       | 1.12              | 1175                    | 1389      | 0.85              |                          |
| <i>yaaD</i>   | 19,060   | 19,944  | +      | 3198                    | 2739      | 1.17              | 3257                    | 3347      | 0.97              | Spo0A regulon            |
| <i>yaaE</i>   | 19,966   | 20,556  | +      | 3247                    | 2767      | 1.17              | 3062                    | 2974      | 1.03              |                          |
| <i>serS</i>   | 20,878   | 22,155  | +      | 2051                    | 1831      | 1.12              | 1615                    | 1508      | 1.07              |                          |
| <i>dck</i>    | 22,494   | 23,147  | -      | 493                     | 385       | 1.28              | 557                     | 558       | 1.00              |                          |
| <i>dgk</i>    | 23,144   | 23,767  | -      | 467                     | 366       | 1.27              | 602                     | 602       | 1.00              |                          |
| <i>yaaH</i>   | 23,866   | 25,149  | -      | 544                     | 274       | 1.98              | 170                     | 78        | 2.18              |                          |
| <i>yaaI</i>   | 25,219   | 25,764  | -      | 1884                    | 1022      | 1.84              | 577                     | 179       | 3.23              |                          |
| <i>yaaJ</i>   | 25,850   | 26,335  | +      | 249                     | 238       | 1.04              | 252                     | 283       | 0.89              |                          |
| <i>dnaX</i>   | 26,812   | 28,503  | +      | 480                     | 368       | 1.30              | 607                     | 664       | 0.91              |                          |
| <i>yaaK</i>   | 28,527   | 28,850  | +      | 1958                    | 1447      | 1.35              | 2186                    | 2475      | 0.88              |                          |
| <i>recR</i>   | 28,865   | 29,461  | +      | 807                     | 530       | 1.52              | 1094                    | 1030      | 1.06              |                          |
| <i>yaaL</i>   | 29,479   | 29,703  | +      | 421                     | 297       | 1.42              | 511                     | 544       | 0.94              |                          |
| <i>bofA</i>   | 29,770   | 30,033  | +      | 162                     | 100       | 1.62              | 171                     | 179       | 0.95              |                          |
| <i>csfB</i>   | 35,529   | 35,723  | +      | 113                     | 84        | 1.35              | 90                      | 61        | 1.48              |                          |
| <i>xpaC</i>   | 35,843   | 36,457  | +      | 367                     | 340       | 1.08              | 290                     | 305       | 0.95              |                          |
| <i>yaaN</i>   | 36,476   | 37,636  | +      | 381                     | 375       | 1.02              | 491                     | 463       | 1.06              |                          |
| <i>yaaO</i>   | 37,718   | 39,160  | +      | 219                     | 176       | 1.25              | 269                     | 293       | 0.92              |                          |
| <i>tmk</i>    | 39,157   | 39,795  | +      | 757                     | 445       | 1.70              | 690                     | 612       | 1.13              |                          |
| <i>yaaQ</i>   | 39,869   | 40,198  | +      | 1627                    | 1380      | 1.18              | 1441                    | 1301      | 1.11              |                          |
| <i>yaaR</i>   | 40,211   | 40,651  | +      | 1579                    | 1345      | 1.17              | 1320                    | 1236      | 1.07              |                          |
| <i>holB</i>   | 40,663   | 41,652  | +      | 1215                    | 967       | 1.26              | 1000                    | 966       | 1.04              |                          |
| <i>yaaT</i>   | 41,655   | 42,482  | +      | 1272                    | 963       | 1.32              | 1226                    | 1267      | 0.97              |                          |
| <i>yabA</i>   | 42,497   | 42,856  | +      | 305                     | 275       | 1.11              | 447                     | 462       | 0.97              |                          |
| <i>yabB</i>   | 42,915   | 43,658  | +      | 295                     | 225       | 1.31              | 364                     | 388       | 0.94              |                          |
| <i>yaaZ</i>   | 43,645   | 43,944  | +      | 198                     | 166       | 1.19              | 374                     | 393       | 0.95              |                          |
| <i>yabC</i>   | 43,919   | 44,797  | +      | 353                     | 272       | 1.30              | 568                     | 556       | 1.02              |                          |
| <i>abrB</i>   | 44,846   | 45,136  | -      | 2790                    | 3430      | 0.81              | 1529                    | 1682      | 0.91              | Spo0A regulon            |
| <i>metS</i>   | 45,631   | 47,625  | +      | 902                     | 897       | 1.00              | 1312                    | 1453      | 0.90              | Spo0A regulon            |
| <i>yabD</i>   | 47,704   | 48,471  | +      | 345                     | 340       | 1.01              | 700                     | 642       | 1.09              |                          |
| <i>yabE</i>   | 48,627   | 49,940  | +      | 624                     | 816       | 0.76              | 766                     | 1199      | 0.64              |                          |
| <i>mmV</i>    | 50,085   | 50,645  | +      | 286                     | 255       | 1.12              | 331                     | 399       | 0.83              |                          |
| <i>ksgA</i>   | 50,638   | 51,516  | +      | 357                     | 282       | 1.27              | 461                     | 494       | 0.93              |                          |
| <i>yabG</i>   | 51,678   | 52,550  | +      | 63                      | 64        | 0.99              | 60                      | 65        | 0.91              |                          |
| <i>veg</i>    | 52,761   | 53,021  | +      | 9229                    | 3266      | 2.83              | 8854                    | 2773      | 3.19              | Spo0A regulon            |
| <i>sspF</i>   | 53,181   | 53,366  | +      | 131                     | 192       | 0.68              | 91                      | 142       | 0.64              |                          |
| <i>ispE</i>   | 53,514   | 54,383  | +      | 815                     | 816       | 1.00              | 1068                    | 1167      | 0.92              |                          |
| <i>purR</i>   | 54,439   | 55,296  | +      | 1618                    | 1619      | 1.00              | 1789                    | 1794      | 1.00              |                          |
| <i>yabJ</i>   | 55,293   | 55,670  | +      | 2111                    | 2056      | 1.03              | 2153                    | 2007      | 1.07              |                          |
| <i>spoVG</i>  | 55,864   | 56,157  | +      | 3895                    | 4865      | 0.80              | 3645                    | 4045      | 0.90              | AbrB regulon             |
| <i>gcaD</i>   | 56,350   | 57,720  | +      | 796                     | 720       | 1.11              | 1455                    | 1704      | 0.85              |                          |
| <i>prs</i>    | 57,743   | 58,696  | +      | 840                     | 632       | 1.33              | 1497                    | 1543      | 0.97              |                          |
| <i>ctc</i>    | 58,781   | 59,395  | +      | 5905                    | 6724      | 0.88              | 3760                    | 3336      | 1.13              |                          |
| <i>spoVC</i>  | 59,502   | 60,068  | +      | 1327                    | 1433      | 0.93              | 793                     | 761       | 1.04              |                          |
| <i>yabK</i>   | 60,128   | 60,358  | +      | 1086                    | 1107      | 0.98              | 686                     | 683       | 1.00              |                          |
| <i>mfd</i>    | 60,428   | 63,961  | +      | 827                     | 754       | 1.10              | 845                     | 762       | 1.11              |                          |
| <i>spoVT</i>  | 64,097   | 64,633  | +      | 402                     | 389       | 1.03              | 618                     | 515       | 1.20              |                          |
| <i>yabM</i>   | 64,815   | 66,413  | +      | 175                     | 144       | 1.22              | 287                     | 245       | 1.17              |                          |
| <i>yabN</i>   | 66,403   | 67,872  | +      | 906                     | 811       | 1.12              | 1138                    | 1042      | 1.09              |                          |
| <i>yabO</i>   | 67,875   | 68,135  | +      | 1541                    | 1469      | 1.05              | 1787                    | 1691      | 1.06              |                          |
| <i>yabP</i>   | 68,214   | 68,516  | +      | 956                     | 848       | 1.13              | 1051                    | 956       | 1.10              |                          |
| <i>yabQ</i>   | 68,513   | 69,148  | +      | 1623                    | 1079      | 1.50              | 1181                    | 1039      | 1.14              |                          |
| <i>divI</i>   | 69,166   | 69,543  | +      | 1943                    | 1400      | 1.39              | 1674                    | 1880      | 0.89              |                          |
| <i>yabR</i>   | 69,624   | 70,010  | +      | 2718                    | 2138      | 1.27              | 2119                    | 2518      | 0.84              |                          |
| <i>spoIIE</i> | 70,536   | 73,019  | +      | 146                     | 111       | 1.31              | 100                     | 88        | 1.14              | Spo0A regulon            |
| <i>yabS</i>   | 73,104   | 73,841  | +      | 263                     | 175       | 1.51              | 169                     | 165       | 1.03              |                          |
| <i>yabT</i>   | 73,807   | 74,823  | +      | 333                     | 213       | 1.57              | 196                     | 128       | 1.54              |                          |
| <i>yaaA</i>   | 74,927   | 76,345  | +      | 1270                    | 938       | 1.35              | 1045                    | 1106      | 0.94              |                          |
| <i>hprT</i>   | 76,342   | 76,884  | +      | 1578                    | 1182      | 1.34              | 1584                    | 1708      | 0.93              |                          |
| <i>ftsH</i>   | 76,982   | 78,895  | +      | 3022                    | 2696      | 1.12              | 2911                    | 3020      | 0.96              |                          |
| <i>yaaB</i>   | 79,090   | 79,791  | +      | 531                     | 479       | 1.11              | 612                     | 616       | 0.99              |                          |
| <i>yaaC</i>   | 79,877   | 80,752  | +      | 494                     | 414       | 1.19              | 690                     | 679       | 1.02              |                          |
| <i>yaaD</i>   | 80,799   | 81,692  | +      | 290                     | 312       | 0.93              | 491                     | 571       | 0.86              |                          |
| <i>cysK</i>   | 81,768   | 82,694  | +      | 2799                    | 2239      | 1.25              | 3065                    | 3426      | 0.89              |                          |
| <i>pabB</i>   | 82,861   | 84,273  | +      | 604                     | 528       | 1.14              | 715                     | 675       | 1.06              |                          |
| <i>pabA</i>   | 84,287   | 84,871  | +      | 834                     | 885       | 0.94              | 1003                    | 1029      | 0.97              |                          |
| <i>pabC</i>   | 84,871   | 85,752  | +      | 504                     | 438       | 1.15              | 643                     | 717       | 0.90              |                          |
| <i>sul</i>    | 85,734   | 86,591  | +      | 744                     | 648       | 1.15              | 963                     | 1044      | 0.92              |                          |
| <i>folB</i>   | 86,584   | 86,946  | +      | 1136                    | 1062      | 1.07              | 1506                    | 1611      | 0.94              |                          |
| <i>folK</i>   | 86,943   | 87,446  | +      | 926                     | 840       | 1.10              | 1208                    | 1300      | 0.93              |                          |
| <i>yaaZ</i>   | 87,398   | 87,607  | +      | 972                     | 828       | 1.17              | 1351                    | 1479      | 0.91              |                          |
| <i>yaaF</i>   | 87,631   | 88,632  | +      | 1442                    | 1275      | 1.13              | 1947                    | 1923      | 1.01              |                          |
| <i>lysS</i>   | 88,724   | 90,223  | +      | 1554                    | 1380      | 1.13              | 2160                    | 1977      | 1.09              |                          |
| <i>ctsR</i>   | 101,446  | 101,910 | +      | 2925                    | 2794      | 1.05              | 1459                    | 1022      | 1.43              |                          |
| <i>mcsA</i>   | 101,924  | 102,481 | +      | 2872                    | 2494      | 1.15              | 975                     | 759       | 1.29              |                          |
| <i>mcsB</i>   | 102,481  | 103,572 | +      | 3527                    | 2915      | 1.21              | 1356                    | 1187      | 1.14              |                          |

|             |         |         |   |      |      |      |      |      |      |
|-------------|---------|---------|---|------|------|------|------|------|------|
| <i>clpC</i> | 103,569 | 106,001 | + | 4646 | 3614 | 1.29 | 2405 | 2058 | 1.17 |
| <i>radA</i> | 106,093 | 107,469 | + | 1845 | 1291 | 1.43 | 1084 | 923  | 1.17 |
| <i>yacK</i> | 107,473 | 108,555 | + | 1920 | 1449 | 1.33 | 1424 | 1276 | 1.12 |
| <i>yacL</i> | 108,671 | 109,771 | + | 2035 | 1899 | 1.07 | 1414 | 1300 | 1.09 |
| <i>yacM</i> | 109,786 | 110,484 | + | 1443 | 1263 | 1.14 | 1129 | 1064 | 1.06 |
| <i>yacN</i> | 110,477 | 110,953 | + | 941  | 694  | 1.36 | 843  | 867  | 0.97 |
| <i>glxX</i> | 111,044 | 112,495 | + | 1889 | 1704 | 1.11 | 2034 | 2210 | 0.92 |
| <i>cysE</i> | 112,797 | 113,450 | + | 611  | 485  | 1.26 | 866  | 874  | 0.99 |
| <i>cysS</i> | 113,447 | 114,847 | + | 851  | 775  | 1.10 | 1078 | 1027 | 1.05 |
| <i>yacZ</i> | 114,851 | 115,282 | + | 644  | 632  | 1.02 | 776  | 816  | 0.95 |
| <i>yacO</i> | 115,266 | 116,015 | + | 1056 | 1028 | 1.03 | 1383 | 1312 | 1.05 |
| <i>yacP</i> | 116,022 | 116,534 | + | 784  | 716  | 1.09 | 984  | 970  | 1.01 |
| <i>sigH</i> | 116,597 | 117,253 | + | 2247 | 2439 | 0.92 | 2032 | 2540 | 0.80 |
| <i>secE</i> | 117,529 | 117,708 | + | 665  | 837  | 0.80 | 1223 | 1626 | 0.75 |
| <i>nusG</i> | 117,887 | 118,420 | + | 1032 | 945  | 1.09 | 1013 | 1401 | 0.72 |
| <i>rplK</i> | 118,588 | 119,013 | + | 4108 | 4453 | 0.92 | 4695 | 4909 | 0.96 |
| <i>rplA</i> | 119,107 | 119,805 | + | 3197 | 3508 | 0.91 | 4094 | 4361 | 0.94 |
| <i>rplJ</i> | 120,057 | 120,557 | + | 3401 | 3954 | 0.86 | 4602 | 4496 | 1.02 |
| <i>rplL</i> | 120,604 | 120,975 | + | 1801 | 2226 | 0.81 | 3186 | 3238 | 0.98 |
| <i>ybxB</i> | 121,065 | 121,670 | + | 568  | 670  | 0.85 | 1026 | 1188 | 0.86 |
| <i>rpoB</i> | 121,916 | 125,497 | + | 2626 | 2872 | 0.91 | 3290 | 3525 | 0.93 |
| <i>rpoC</i> | 125,559 | 129,158 | + | 3201 | 3755 | 0.85 | 3747 | 3814 | 0.98 |
| <i>ybxF</i> | 129,339 | 129,587 | + | 5745 | 5779 | 0.99 | 6169 | 5939 | 1.04 |
| <i>rpsL</i> | 129,701 | 130,117 | + | 6365 | 6753 | 0.94 | 6755 | 6301 | 1.07 |
| <i>rpsG</i> | 130,159 | 130,629 | + | 5468 | 5991 | 0.91 | 5665 | 5619 | 1.01 |
| <i>fusA</i> | 130,683 | 132,761 | + | 6390 | 6916 | 0.92 | 6237 | 5959 | 1.05 |
| <i>tufA</i> | 132,881 | 134,071 | + | 6956 | 7376 | 0.94 | 6276 | 5852 | 1.07 |
| <i>ybaC</i> | 134,170 | 135,126 | + | 151  | 132  | 1.14 | 172  | 175  | 0.98 |
| <i>rpsJ</i> | 135,362 | 135,670 | + | 6127 | 6618 | 0.93 | 5275 | 5292 | 1.00 |
| <i>rplC</i> | 135,710 | 136,339 | + | 5923 | 6594 | 0.90 | 5805 | 5588 | 1.04 |
| <i>rplD</i> | 136,367 | 136,990 | + | 6009 | 6519 | 0.92 | 5545 | 5168 | 1.07 |
| <i>rplW</i> | 136,990 | 137,277 | + | 6655 | 6955 | 0.96 | 6569 | 6385 | 1.03 |
| <i>rplB</i> | 137,309 | 138,142 | + | 6484 | 7081 | 0.92 | 5859 | 5674 | 1.03 |
| <i>rpsS</i> | 138,200 | 138,478 | + | 6230 | 7027 | 0.89 | 6503 | 6246 | 1.04 |
| <i>rplV</i> | 138,495 | 138,836 | + | 6599 | 7113 | 0.93 | 6388 | 6281 | 1.02 |
| <i>rpsC</i> | 138,840 | 139,496 | + | 5299 | 5971 | 0.89 | 5753 | 5500 | 1.05 |
| <i>rplP</i> | 139,498 | 139,932 | + | 5984 | 6461 | 0.93 | 5845 | 5703 | 1.02 |
| <i>rpmC</i> | 139,922 | 140,122 | + | 6000 | 6127 | 0.98 | 4926 | 5104 | 0.97 |
| <i>rpsQ</i> | 140,145 | 140,408 | + | 6162 | 6746 | 0.91 | 6020 | 5710 | 1.05 |
| <i>rplN</i> | 140,449 | 140,817 | + | 7023 | 7903 | 0.89 | 6932 | 6646 | 1.04 |
| <i>rplX</i> | 140,855 | 141,166 | + | 6423 | 7004 | 0.92 | 6038 | 5577 | 1.08 |
| <i>rplE</i> | 141,193 | 141,732 | + | 6268 | 6792 | 0.92 | 5485 | 5095 | 1.08 |
| <i>rpsN</i> | 141,755 | 141,940 | + | 5568 | 5656 | 0.98 | 4859 | 4400 | 1.10 |
| <i>rpsH</i> | 141,972 | 142,370 | + | 6958 | 7571 | 0.92 | 6368 | 5817 | 1.09 |
| <i>rplF</i> | 142,400 | 142,939 | + | 6201 | 6745 | 0.92 | 5705 | 5308 | 1.07 |
| <i>rplR</i> | 142,972 | 143,334 | + | 7285 | 8034 | 0.91 | 6595 | 6111 | 1.08 |
| <i>rpsE</i> | 143,359 | 143,859 | + | 6342 | 6911 | 0.92 | 5664 | 5371 | 1.05 |
| <i>rpmD</i> | 143,873 | 144,052 | + | 3345 | 3638 | 0.92 | 2929 | 3128 | 0.94 |
| <i>rplO</i> | 144,083 | 144,523 | + | 7038 | 7480 | 0.94 | 5898 | 5566 | 1.06 |
| <i>secY</i> | 144,525 | 145,820 | + | 6803 | 7284 | 0.93 | 5699 | 5378 | 1.06 |
| <i>adk</i>  | 145,875 | 146,528 | + | 6646 | 6988 | 0.95 | 5538 | 5201 | 1.06 |
| <i>map</i>  | 146,525 | 147,271 | + | 6170 | 6557 | 0.94 | 5505 | 5237 | 1.05 |
| <i>infA</i> | 147,583 | 147,801 | + | 6106 | 4767 | 1.28 | 5161 | 4907 | 1.05 |
| <i>rpsM</i> | 147,971 | 148,336 | + | 5970 | 6389 | 0.93 | 5446 | 5053 | 1.08 |
| <i>rpsK</i> | 148,357 | 148,752 | + | 6136 | 6540 | 0.94 | 5338 | 5056 | 1.06 |
| <i>rpoA</i> | 148,929 | 149,873 | + | 6881 | 7291 | 0.94 | 6211 | 5811 | 1.07 |
| <i>rplQ</i> | 149,951 | 150,313 | + | 3846 | 3982 | 0.97 | 3424 | 3382 | 1.01 |
| <i>ybxA</i> | 150,441 | 151,286 | + | 750  | 746  | 1.01 | 1072 | 1025 | 1.05 |
| <i>ybaE</i> | 151,301 | 152,131 | + | 493  | 481  | 1.02 | 662  | 650  | 1.02 |
| <i>ybaF</i> | 152,128 | 152,925 | + | 603  | 541  | 1.12 | 660  | 652  | 1.01 |
| <i>truA</i> | 152,935 | 153,678 | + | 942  | 759  | 1.24 | 1469 | 1287 | 1.14 |
| <i>rplM</i> | 153,841 | 154,278 | + | 4880 | 5244 | 0.93 | 5586 | 5531 | 1.01 |
| <i>rpsI</i> | 154,299 | 154,691 | + | 2539 | 2947 | 0.86 | 3791 | 3793 | 1.00 |
| <i>ybaJ</i> | 155,155 | 155,922 | + | 249  | 269  | 0.92 | 440  | 505  | 0.87 |
| <i>ybaK</i> | 156,108 | 156,551 | + | 36   | 37   | 0.97 | 42   | 49   | 0.86 |
| <i>cwlD</i> | 156,611 | 157,324 | + | 54   | 56   | 0.96 | 51   | 59   | 0.86 |
| <i>ybaL</i> | 157,420 | 158,478 | + | 2247 | 2439 | 0.92 | 2339 | 2362 | 0.99 |
| <i>gerD</i> | 158,514 | 159,071 | - | 32   | 36   | 0.89 | 34   | 34   | 1.01 |
| <i>kbaA</i> | 159,181 | 159,777 | + | 238  | 298  | 0.80 | 282  | 407  | 0.69 |
| <i>ybaN</i> | 159,778 | 160,542 | - | 29   | 34   | 0.87 | 28   | 31   | 0.88 |
| <i>ybaR</i> | 177,082 | 178,518 | + | 280  | 254  | 1.10 | 426  | 407  | 1.04 |
| <i>ybaS</i> | 178,733 | 179,584 | + | 189  | 149  | 1.27 | 244  | 223  | 1.10 |
| <i>ybaA</i> | 179,594 | 180,163 | - | 183  | 205  | 0.89 | 122  | 162  | 0.75 |
| <i>feuC</i> | 180,168 | 181,352 | - | 239  | 268  | 0.89 | 146  | 187  | 0.78 |
| <i>feuB</i> | 181,345 | 182,349 | - | 231  | 258  | 0.90 | 115  | 142  | 0.81 |
| <i>feuA</i> | 182,368 | 183,321 | - | 592  | 706  | 0.84 | 322  | 425  | 0.76 |
| <i>ybbB</i> | 183,412 | 185,001 | - | 291  | 304  | 0.96 | 209  | 255  | 0.82 |
| <i>ybbC</i> | 185,192 | 186,436 | - | 84   | 96   | 0.88 | 92   | 109  | 0.84 |
| <i>ybbD</i> | 186,450 | 188,378 | - | 96   | 108  | 0.89 | 101  | 118  | 0.85 |
| <i>ybbE</i> | 188,406 | 189,731 | - | 107  | 113  | 0.95 | 116  | 143  | 0.82 |
| <i>ybbF</i> | 189,788 | 191,155 | - | 90   | 91   | 0.99 | 89   | 108  | 0.82 |
| <i>ybbH</i> | 191,181 | 192,032 | - | 136  | 136  | 1.00 | 185  | 211  | 0.88 |
| <i>ybbI</i> | 192,049 | 192,963 | - | 177  | 187  | 0.95 | 263  | 291  | 0.90 |
| <i>ybbJ</i> | 193,134 | 193,553 | - | 98   | 122  | 0.80 | 107  | 107  | 1.00 |
| <i>ybbK</i> | 193,566 | 194,021 | - | 269  | 346  | 0.78 | 282  | 281  | 1.00 |
| <i>sigW</i> | 194,838 | 195,401 | + | 3000 | 2722 | 1.10 | 3712 | 3556 | 1.04 |
| <i>ybbM</i> | 195,415 | 196,041 | + | 1416 | 1287 | 1.10 | 2112 | 1952 | 1.08 |
| <i>ybbP</i> | 196,202 | 197,023 | + | 718  | 700  | 1.02 | 783  | 867  | 0.90 |
| <i>ybbR</i> | 197,016 | 198,467 | + | 841  | 733  | 1.15 | 1143 | 1289 | 0.89 |
| <i>ybbT</i> | 198,486 | 199,832 | + | 735  | 647  | 1.13 | 1078 | 1196 | 0.90 |
| <i>glmS</i> | 200,263 | 202,065 | + | 873  | 836  | 1.04 | 1103 | 1312 | 0.84 |

AbrB regulon

|              |         |         |   |      |       |      |      |      |      |                        |
|--------------|---------|---------|---|------|-------|------|------|------|------|------------------------|
| <i>alkA</i>  | 202,533 | 203,444 | - | 112  | 110   | 1.02 | 138  | 140  | 0.99 |                        |
| <i>adaA</i>  | 203,715 | 204,350 | + | 46   | 58    | 0.80 | 38   | 35   | 1.07 |                        |
| <i>adaB</i>  | 204,337 | 204,876 | + | 59   | 63    | 0.94 | 42   | 46   | 0.92 |                        |
| <i>ndhF</i>  | 205,395 | 206,912 | + | 101  | 77    | 1.31 | 48   | 47   | 1.03 |                        |
| <i>ybcC</i>  | 206,927 | 207,169 | + | 82   | 63    | 1.31 | 31   | 37   | 0.84 |                        |
| <i>ybcD</i>  | 207,166 | 209,430 | + | 204  | 133   | 1.54 | 59   | 57   | 1.02 |                        |
| <i>ybcF</i>  | 209,619 | 210,146 | + | 242  | 164   | 1.48 | 54   | 50   | 1.06 |                        |
| <i>ybcH</i>  | 210,210 | 210,500 | + | 269  | 199   | 1.35 | 60   | 58   | 1.04 |                        |
| <i>ybcI</i>  | 210,558 | 210,932 | + | 289  | 215   | 1.34 | 73   | 73   | 1.00 |                        |
| <i>ybcL</i>  | 211,845 | 213,017 | + | 68   | 69    | 1.00 | 82   | 80   | 1.02 |                        |
| <i>ybcM</i>  | 213,141 | 213,455 | + | 62   | 62    | 1.00 | 56   | 74   | 0.76 |                        |
| <i>ybcO</i>  | 213,926 | 214,093 | + | 1321 | 1590  | 0.83 | 1666 | 2253 | 0.74 | Spo0A and AbrB regulon |
| <i>ybcP</i>  | 214,160 | 215,392 | + | 640  | 817   | 0.78 | 889  | 1093 | 0.81 | AbrB regulon           |
| <i>ybcS</i>  | 215,389 | 215,946 | + | 515  | 685   | 0.75 | 781  | 948  | 0.82 | AbrB regulon           |
| <i>ybcT</i>  | 215,943 | 216,878 | + | 447  | 536   | 0.83 | 615  | 740  | 0.83 | AbrB regulon           |
| <i>ybdA</i>  | 216,897 | 217,616 | + | 498  | 581   | 0.86 | 674  | 794  | 0.85 | AbrB regulon           |
| <i>ybdB</i>  | 217,681 | 219,027 | + | 286  | 320   | 0.89 | 370  | 448  | 0.83 | AbrB regulon           |
| <i>ybdD</i>  | 219,074 | 219,487 | + | 378  | 425   | 0.89 | 565  | 627  | 0.90 | AbrB regulon           |
| <i>ybdE</i>  | 219,593 | 220,018 | + | 196  | 233   | 0.84 | 357  | 438  | 0.81 | AbrB regulon           |
| <i>ybdG</i>  | 220,264 | 221,154 | + | 119  | 114   | 1.04 | 179  | 159  | 1.13 |                        |
| <i>ybdI</i>  | 221,246 | 221,917 | + | 228  | 187   | 1.22 | 282  | 252  | 1.12 |                        |
| <i>ybdK</i>  | 221,938 | 222,900 | + | 292  | 237   | 1.23 | 395  | 397  | 1.00 |                        |
| <i>ybdL</i>  | 222,970 | 223,164 | + | 724  | 762   | 0.95 | 1142 | 1132 | 1.01 |                        |
| <i>ybdM</i>  | 223,207 | 223,977 | - | 115  | 109   | 1.06 | 109  | 106  | 1.02 |                        |
| <i>ybdN</i>  | 224,063 | 224,920 | - | 676  | 729   | 0.93 | 735  | 693  | 1.06 | AbrB regulon           |
| <i>ybdO</i>  | 225,052 | 226,236 | + | 1025 | 1622  | 0.63 | 908  | 1230 | 0.74 | AbrB and SigD regulon  |
| <i>ybxG</i>  | 226,554 | 227,942 | + | 412  | 510   | 0.81 | 542  | 587  | 0.92 |                        |
| <i>csgA</i>  | 228,054 | 228,302 | + | 50   | 39    | 1.29 | 44   | 37   | 1.20 |                        |
| <i>ybxH</i>  | 228,319 | 228,510 | + | 21   | 22    | 0.93 | 31   | 23   | 1.30 |                        |
| <i>ybxI</i>  | 228,537 | 229,340 | - | 177  | 188   | 0.95 | 201  | 209  | 0.96 |                        |
| <i>cypC</i>  | 229,513 | 230,766 | + | 1370 | 1039  | 1.32 | 592  | 293  | 2.02 |                        |
| <i>ybyB</i>  | 230,807 | 231,067 | - | 8763 | 10016 | 0.87 | 5770 | 4328 | 1.33 |                        |
| <i>ybcC</i>  | 231,336 | 232,955 | + | 1255 | 1471  | 0.85 | 994  | 1204 | 0.83 |                        |
| <i>glpQ</i>  | 233,002 | 233,883 | - | 105  | 126   | 0.84 | 100  | 131  | 0.76 |                        |
| <i>glpT</i>  | 233,982 | 235,316 | - | 78   | 101   | 0.77 | 70   | 99   | 0.70 |                        |
| <i>ybcF</i>  | 235,613 | 235,861 | + | 34   | 38    | 0.89 | 44   | 42   | 1.05 |                        |
| <i>ybfA</i>  | 235,953 | 236,870 | + | 185  | 180   | 1.03 | 187  | 195  | 0.96 |                        |
| <i>ybfB</i>  | 236,867 | 238,117 | + | 131  | 118   | 1.12 | 134  | 135  | 0.99 |                        |
| <i>ybfE</i>  | 238,152 | 238,436 | - | 100  | 73    | 1.37 | 160  | 174  | 0.92 |                        |
| <i>ybfF</i>  | 238,632 | 239,543 | - | 197  | 138   | 1.43 | 333  | 268  | 1.24 |                        |
| <i>ybfG</i>  | 239,632 | 241,830 | - | 1349 | 559   | 2.41 | 2187 | 1126 | 1.94 |                        |
| <i>ybfH</i>  | 241,905 | 242,825 | - | 113  | 144   | 0.79 | 132  | 158  | 0.84 |                        |
| <i>ybfI</i>  | 242,822 | 243,649 | - | 160  | 209   | 0.77 | 136  | 185  | 0.74 |                        |
| <i>purT</i>  | 243,880 | 245,034 | + | 1126 | 1071  | 1.05 | 1518 | 1433 | 1.06 |                        |
| <i>mpr</i>   | 245,178 | 246,119 | + | 584  | 619   | 0.94 | 676  | 650  | 1.04 |                        |
| <i>ybfJ</i>  | 246,082 | 246,480 | + | 154  | 156   | 0.99 | 185  | 203  | 0.91 |                        |
| <i>ybfK</i>  | 246,646 | 247,536 | + | 591  | 498   | 1.19 | 569  | 651  | 0.87 |                        |
| <i>psaA</i>  | 247,732 | 248,265 | + | 452  | 401   | 1.13 | 537  | 614  | 0.87 |                        |
| <i>ybfM</i>  | 248,256 | 248,744 | + | 358  | 286   | 1.25 | 439  | 470  | 0.93 |                        |
| <i>psd</i>   | 248,737 | 249,528 | + | 421  | 343   | 1.23 | 443  | 483  | 0.92 |                        |
| <i>ybfN</i>  | 249,583 | 249,861 | + | 64   | 70    | 0.92 | 65   | 71   | 0.91 |                        |
| <i>ybfO</i>  | 249,967 | 251,307 | + | 662  | 543   | 1.22 | 1090 | 960  | 1.14 | AbrB regulon           |
| <i>ybfP</i>  | 251,415 | 252,302 | + | 220  | 185   | 1.19 | 407  | 344  | 1.18 | AbrB regulon           |
| <i>ybfQ</i>  | 252,502 | 253,470 | + | 1191 | 1133  | 1.05 | 1342 | 1206 | 1.11 |                        |
| <i>gluP</i>  | 253,506 | 254,750 | - | 145  | 155   | 0.93 | 134  | 138  | 0.97 |                        |
| <i>gamP</i>  | 254,895 | 256,790 | - | 266  | 550   | 0.48 | 236  | 495  | 0.48 |                        |
| <i>gamA</i>  | 256,811 | 257,560 | - | 327  | 664   | 0.49 | 339  | 625  | 0.54 |                        |
| <i>ybgA</i>  | 257,779 | 258,486 | + | 183  | 171   | 1.07 | 210  | 212  | 0.99 |                        |
| <i>ybgB</i>  | 258,520 | 258,795 | + | 69   | 69    | 1.01 | 114  | 106  | 1.07 |                        |
| <i>ybgE</i>  | 259,004 | 260,074 | + | 447  | 474   | 0.94 | 667  | 579  | 1.15 |                        |
| <i>ybgF</i>  | 260,111 | 261,523 | - | 336  | 239   | 1.41 | 619  | 528  | 1.17 |                        |
| <i>ybgG</i>  | 261,644 | 262,591 | - | 251  | 263   | 0.96 | 315  | 343  | 0.92 |                        |
| <i>ybgH</i>  | 262,720 | 264,111 | - | 93   | 94    | 1.00 | 69   | 73   | 0.95 |                        |
| <i>ybgJ</i>  | 264,181 | 265,164 | - | 57   | 64    | 0.89 | 49   | 57   | 0.85 |                        |
| <i>ycbA</i>  | 265,536 | 266,699 | + | 140  | 127   | 1.10 | 134  | 151  | 0.89 |                        |
| <i>ycbB</i>  | 266,710 | 267,654 | + | 134  | 112   | 1.19 | 166  | 175  | 0.94 |                        |
| <i>ycbC</i>  | 267,881 | 268,807 | + | 84   | 85    | 0.99 | 77   | 96   | 0.79 |                        |
| <i>ycbD</i>  | 268,837 | 270,303 | + | 121  | 131   | 0.92 | 107  | 134  | 0.80 |                        |
| <i>ycbE</i>  | 270,387 | 271,754 | + | 77   | 79    | 0.97 | 65   | 75   | 0.86 |                        |
| <i>ycbF</i>  | 271,791 | 273,158 | + | 131  | 140   | 0.94 | 103  | 125  | 0.83 |                        |
| <i>ycbG</i>  | 273,228 | 273,929 | + | 245  | 232   | 1.05 | 423  | 455  | 0.93 |                        |
| <i>ycbH</i>  | 274,020 | 275,552 | + | 118  | 118   | 1.00 | 123  | 139  | 0.89 |                        |
| <i>ycbJ</i>  | 275,829 | 276,749 | + | 825  | 808   | 1.02 | 870  | 986  | 0.88 |                        |
| <i>yczA</i>  | 277,151 | 277,312 | + | 95   | 115   | 0.83 | 151  | 143  | 1.06 |                        |
| <i>ycbK</i>  | 277,333 | 278,271 | + | 179  | 182   | 0.98 | 172  | 180  | 0.95 |                        |
| <i>ycbL</i>  | 278,368 | 279,048 | + | 98   | 97    | 1.01 | 98   | 118  | 0.84 |                        |
| <i>ycbM</i>  | 279,050 | 279,526 | + | 166  | 175   | 0.94 | 252  | 273  | 0.92 |                        |
| <i>ycbN</i>  | 279,682 | 280,521 | + | 119  | 110   | 1.08 | 161  | 177  | 0.91 |                        |
| <i>ycbO</i>  | 280,640 | 281,254 | + | 145  | 116   | 1.25 | 242  | 237  | 1.02 |                        |
| <i>ycbP</i>  | 281,309 | 281,695 | - | 2851 | 1822  | 1.56 | 1679 | 848  | 1.98 |                        |
| <i>cwiJ</i>  | 282,009 | 282,437 | + | 71   | 69    | 1.04 | 61   | 73   | 0.84 |                        |
| <i>ycbR</i>  | 282,543 | 283,274 | + | 93   | 90    | 1.04 | 95   | 111  | 0.85 |                        |
| <i>phoD</i>  | 283,553 | 285,223 | + | 81   | 80    | 1.01 | 59   | 69   | 0.86 |                        |
| <i>tatAD</i> | 285,318 | 285,530 | + | 58   | 62    | 0.93 | 56   | 51   | 1.09 |                        |
| <i>tatCD</i> | 285,591 | 286,328 | + | 46   | 51    | 0.89 | 41   | 47   | 0.88 |                        |
| <i>pcp</i>   | 286,325 | 286,972 | - | 422  | 365   | 1.16 | 429  | 381  | 1.13 |                        |
| <i>ycbU</i>  | 287,051 | 288,163 | + | 342  | 288   | 1.19 | 313  | 287  | 1.09 |                        |
| <i>lmrB</i>  | 288,205 | 289,644 | - | 161  | 134   | 1.20 | 313  | 342  | 0.92 |                        |
| <i>lmrA</i>  | 289,684 | 290,250 | - | 169  | 186   | 0.91 | 265  | 308  | 0.86 |                        |
| <i>yccC</i>  | 290,467 | 291,594 | + | 106  | 132   | 0.81 | 79   | 90   | 0.88 |                        |
| <i>lip</i>   | 291,757 | 292,395 | + | 1120 | 1088  | 1.03 | 2629 | 2542 | 1.03 | AbrB regulon           |

|              |         |         |   |      |       |      |      |      |      |               |
|--------------|---------|---------|---|------|-------|------|------|------|------|---------------|
| <i>yczC</i>  | 292,433 | 292,816 | - | 142  | 134   | 1.06 | 141  | 119  | 1.18 |               |
| <i>yccF</i>  | 293,051 | 294,127 | + | 508  | 449   | 1.13 | 647  | 725  | 0.89 |               |
| <i>yccG</i>  | 294,167 | 295,123 | - | 150  | 134   | 1.12 | 157  | 170  | 0.92 |               |
| <i>yccH</i>  | 295,136 | 295,837 | - | 134  | 123   | 1.09 | 172  | 183  | 0.94 |               |
| <i>natA</i>  | 295,981 | 296,721 | + | 109  | 96    | 1.14 | 118  | 117  | 1.02 |               |
| <i>natB</i>  | 296,722 | 297,882 | + | 129  | 101   | 1.28 | 193  | 156  | 1.23 |               |
| <i>yccK</i>  | 298,018 | 298,950 | + | 273  | 262   | 1.04 | 320  | 310  | 1.03 |               |
| <i>yedA</i>  | 298,990 | 300,054 | - | 1002 | 600   | 1.67 | 1244 | 891  | 1.40 | AbrB regulon  |
| <i>yedB</i>  | 300,382 | 301,800 | + | 148  | 140   | 1.06 | 209  | 182  | 1.15 |               |
| <i>yedC</i>  | 301,987 | 303,348 | + | 141  | 114   | 1.23 | 169  | 171  | 0.99 |               |
| <i>yedD</i>  | 303,356 | 303,859 | - | 152  | 132   | 1.15 | 151  | 151  | 1.00 |               |
| <i>rapJ</i>  | 303,982 | 305,103 | + | 746  | 641   | 1.16 | 665  | 724  | 0.92 |               |
| <i>yedF</i>  | 305,210 | 305,986 | + | 3691 | 2442  | 1.51 | 1655 | 748  | 2.21 |               |
| <i>yedG</i>  | 306,011 | 307,696 | + | 3876 | 2446  | 1.58 | 1428 | 578  | 2.47 |               |
| <i>yedH</i>  | 307,884 | 308,843 | + | 321  | 208   | 1.55 | 184  | 181  | 1.01 |               |
| <i>yedI</i>  | 308,899 | 309,594 | + | 202  | 197   | 1.02 | 187  | 190  | 0.98 |               |
| <i>yceA</i>  | 309,552 | 310,394 | + | 179  | 142   | 1.26 | 252  | 212  | 1.19 |               |
| <i>yceB</i>  | 310,432 | 311,373 | - | 109  | 99    | 1.10 | 119  | 121  | 0.99 |               |
| <i>yceC</i>  | 311,711 | 312,310 | + | 3220 | 2891  | 1.11 | 3730 | 3694 | 1.01 |               |
| <i>yceD</i>  | 312,332 | 312,913 | + | 3413 | 3105  | 1.10 | 3947 | 3648 | 1.08 |               |
| <i>yceE</i>  | 312,948 | 313,526 | + | 3029 | 2968  | 1.02 | 3732 | 3585 | 1.04 |               |
| <i>yceF</i>  | 313,577 | 314,350 | + | 3201 | 3000  | 1.07 | 3558 | 3416 | 1.04 |               |
| <i>yceG</i>  | 314,435 | 316,048 | + | 1352 | 1199  | 1.13 | 1816 | 1621 | 1.12 |               |
| <i>yceH</i>  | 316,064 | 317,155 | + | 1753 | 1528  | 1.15 | 2303 | 2036 | 1.13 |               |
| <i>yceI</i>  | 317,277 | 318,479 | + | 911  | 682   | 1.34 | 828  | 821  | 1.01 |               |
| <i>yceJ</i>  | 318,732 | 319,904 | - | 47   | 47    | 1.00 | 44   | 47   | 0.93 |               |
| <i>yceK</i>  | 319,973 | 320,275 | - | 154  | 151   | 1.02 | 178  | 366  | 0.49 |               |
| <i>opuAA</i> | 320,565 | 321,821 | + | 1600 | 1171  | 1.37 | 2766 | 3192 | 0.87 |               |
| <i>opuAB</i> | 321,823 | 322,671 | + | 1964 | 1644  | 1.19 | 3753 | 3747 | 1.00 |               |
| <i>opuAC</i> | 322,671 | 323,552 | + | 1618 | 1523  | 1.06 | 3215 | 3306 | 0.97 |               |
| <i>amhX</i>  | 323,571 | 324,740 | - | 1470 | 1351  | 1.09 | 1324 | 1212 | 1.09 |               |
| <i>yegA</i>  | 325,133 | 326,323 | + | 297  | 267   | 1.11 | 166  | 164  | 1.01 |               |
| <i>yegB</i>  | 326,439 | 327,020 | + | 221  | 198   | 1.11 | 147  | 142  | 1.03 |               |
| <i>amyE</i>  | 327,169 | 329,151 | + | 230  | 248   | 0.93 | 214  | 196  | 1.09 | AbrB regulon  |
| <i>ldh</i>   | 329,328 | 330,293 | + | 9799 | 10347 | 0.95 | 5502 | 4795 | 1.15 |               |
| <i>lctP</i>  | 330,325 | 331,950 | + | 7025 | 7487  | 0.94 | 1492 | 938  | 1.59 |               |
| <i>mdr</i>   | 332,258 | 333,538 | - | 199  | 242   | 0.82 | 270  | 414  | 0.65 |               |
| <i>yegE</i>  | 333,651 | 334,118 | + | 137  | 132   | 1.04 | 118  | 178  | 0.66 |               |
| <i>yegF</i>  | 334,192 | 334,821 | + | 168  | 142   | 1.18 | 162  | 215  | 0.75 |               |
| <i>yegG</i>  | 334,891 | 335,652 | + | 123  | 109   | 1.13 | 125  | 169  | 0.74 |               |
| <i>yegH</i>  | 335,684 | 336,817 | - | 59   | 61    | 0.95 | 51   | 61   | 0.84 |               |
| <i>yegI</i>  | 336,984 | 337,718 | + | 52   | 52    | 1.01 | 53   | 68   | 0.77 |               |
| <i>nadE</i>  | 337,848 | 338,666 | + | 3557 | 2595  | 1.37 | 2235 | 1644 | 1.36 |               |
| <i>tmrB</i>  | 338,716 | 339,309 | - | 127  | 113   | 1.12 | 184  | 160  | 1.15 |               |
| <i>aroK</i>  | 339,585 | 340,145 | + | 103  | 113   | 0.91 | 154  | 161  | 0.96 |               |
| <i>yegJ</i>  | 340,173 | 340,859 | - | 121  | 131   | 0.92 | 122  | 126  | 0.97 |               |
| <i>yegK</i>  | 341,052 | 342,026 | + | 83   | 91    | 0.91 | 96   | 124  | 0.77 |               |
| <i>cah</i>   | 342,098 | 343,054 | + | 138  | 145   | 0.95 | 260  | 335  | 0.78 |               |
| <i>yegL</i>  | 343,138 | 343,920 | + | 154  | 132   | 1.17 | 370  | 385  | 0.96 |               |
| <i>yegM</i>  | 344,111 | 345,022 | + | 121  | 140   | 0.86 | 200  | 191  | 1.05 | Spo0A regulon |
| <i>yegN</i>  | 345,039 | 346,586 | + | 214  | 220   | 0.97 | 328  | 323  | 1.02 |               |
| <i>yegO</i>  | 346,782 | 348,131 | + | 716  | 481   | 1.49 | 1054 | 946  | 1.11 |               |
| <i>yegP</i>  | 348,284 | 349,519 | + | 136  | 155   | 0.88 | 151  | 158  | 0.95 |               |
| <i>yegQ</i>  | 349,556 | 350,413 | - | 109  | 106   | 1.03 | 208  | 208  | 1.00 |               |
| <i>yegR</i>  | 350,418 | 351,302 | - | 118  | 104   | 1.13 | 147  | 159  | 0.92 |               |
| <i>yegS</i>  | 351,402 | 352,256 | - | 61   | 71    | 0.87 | 85   | 87   | 0.98 |               |
| <i>yegT</i>  | 352,418 | 353,428 | + | 575  | 805   | 0.71 | 457  | 676  | 0.68 |               |
| <i>nasF</i>  | 353,460 | 354,911 | - | 1595 | 829   | 1.92 | 514  | 389  | 1.32 |               |
| <i>nasE</i>  | 354,972 | 355,292 | - | 2563 | 1327  | 1.93 | 495  | 303  | 1.64 |               |
| <i>nasD</i>  | 355,324 | 357,741 | - | 2621 | 1216  | 2.16 | 395  | 207  | 1.91 |               |
| <i>nasC</i>  | 357,863 | 359,995 | - | 105  | 100   | 1.05 | 83   | 97   | 0.86 |               |
| <i>nasB</i>  | 360,002 | 362,314 | - | 101  | 93    | 1.09 | 79   | 82   | 0.96 |               |
| <i>nasA</i>  | 362,494 | 363,759 | + | 153  | 131   | 1.17 | 106  | 116  | 0.92 |               |
| <i>yciA</i>  | 363,815 | 364,732 | + | 37   | 39    | 0.93 | 35   | 38   | 0.92 |               |
| <i>yciB</i>  | 364,729 | 365,313 | + | 39   | 44    | 0.89 | 39   | 48   | 0.81 |               |
| <i>yciC</i>  | 365,622 | 366,815 | + | 68   | 67    | 1.00 | 45   | 56   | 0.81 |               |
| <i>yekA</i>  | 366,864 | 367,544 | - | 92   | 108   | 0.86 | 183  | 207  | 0.89 |               |
| <i>yekB</i>  | 367,554 | 368,417 | - | 247  | 279   | 0.89 | 380  | 509  | 0.75 |               |
| <i>yekC</i>  | 368,795 | 369,250 | + | 223  | 141   | 1.58 | 146  | 115  | 1.28 |               |
| <i>yekD</i>  | 369,332 | 369,664 | + | 49   | 53    | 0.91 | 47   | 49   | 0.95 |               |
| <i>yekE</i>  | 369,818 | 371,251 | + | 73   | 74    | 0.99 | 83   | 88   | 0.95 |               |
| <i>nin</i>   | 371,288 | 371,686 | - | 675  | 709   | 0.95 | 572  | 851  | 0.67 |               |
| <i>nucA</i>  | 371,713 | 372,156 | - | 1344 | 1345  | 1.00 | 1395 | 1657 | 0.84 |               |
| <i>tlpC</i>  | 372,330 | 374,051 | - | 464  | 366   | 1.27 | 405  | 348  | 1.16 | SigD regulon  |
| <i>hxlB</i>  | 374,162 | 374,719 | - | 997  | 1236  | 0.81 | 250  | 253  | 0.99 |               |
| <i>hxlA</i>  | 374,725 | 375,357 | - | 1012 | 1265  | 0.80 | 245  | 273  | 0.90 |               |
| <i>hxlR</i>  | 375,589 | 375,951 | + | 368  | 420   | 0.88 | 481  | 561  | 0.86 |               |
| <i>srfAA</i> | 376,525 | 387,291 | + | 5449 | 6398  | 0.85 | 5098 | 5311 | 0.96 |               |
| <i>srfAB</i> | 387,304 | 398,067 | + | 6857 | 8150  | 0.84 | 5967 | 6010 | 0.99 |               |
| <i>srfAC</i> | 398,104 | 401,928 | + | 6740 | 7877  | 0.86 | 5980 | 6048 | 0.99 |               |
| <i>srfAD</i> | 401,957 | 402,685 | + | 4807 | 6035  | 0.80 | 4409 | 4528 | 0.97 |               |
| <i>yexA</i>  | 402,786 | 404,015 | + | 392  | 514   | 0.76 | 368  | 487  | 0.76 |               |
| <i>yexB</i>  | 404,030 | 404,587 | - | 104  | 94    | 1.11 | 134  | 130  | 1.04 |               |
| <i>yexC</i>  | 404,641 | 405,579 | - | 96   | 86    | 1.12 | 65   | 79   | 0.83 |               |
| <i>yexD</i>  | 405,703 | 407,037 | + | 77   | 78    | 0.99 | 74   | 85   | 0.87 |               |
| <i>sfp</i>   | 407,210 | 407,707 | - | 183  | 183   | 1.00 | 238  | 233  | 1.02 |               |
| <i>yczE</i>  | 407,812 | 408,459 | - | 126  | 142   | 0.89 | 169  | 176  | 0.96 |               |
| <i>yekI</i>  | 408,777 | 409,520 | - | 668  | 349   | 1.92 | 700  | 447  | 1.57 |               |
| <i>yekJ</i>  | 409,534 | 410,238 | - | 499  | 255   | 1.96 | 536  | 343  | 1.56 |               |
| <i>yekK</i>  | 410,225 | 411,031 | - | 859  | 493   | 1.74 | 928  | 604  | 1.54 |               |
| <i>yelA</i>  | 411,146 | 412,018 | - | 267  | 195   | 1.37 | 181  | 109  | 1.66 |               |



|              |         |         |   |      |      |      |      |      |      |
|--------------|---------|---------|---|------|------|------|------|------|------|
| <i>yclB</i>  | 412,108 | 412,722 | + | 87   | 95   | 0.92 | 66   | 78   | 0.85 |
| <i>yclC</i>  | 412,725 | 414,146 | + | 61   | 72   | 0.84 | 68   | 77   | 0.88 |
| <i>yclD</i>  | 414,163 | 414,852 | + | 69   | 78   | 0.88 | 75   | 87   | 0.86 |
| <i>yclE</i>  | 414,918 | 415,763 | + | 138  | 135  | 1.02 | 116  | 118  | 0.98 |
| <i>yclF</i>  | 415,803 | 417,281 | - | 64   | 69   | 0.93 | 62   | 73   | 0.84 |
| <i>yclG</i>  | 417,561 | 419,315 | + | 60   | 57   | 1.05 | 46   | 52   | 0.89 |
| <i>yczF</i>  | 419,331 | 419,552 | - | 29   | 32   | 0.91 | 39   | 37   | 1.06 |
| <i>gerKA</i> | 419,678 | 421,312 | + | 101  | 96   | 1.05 | 78   | 96   | 0.81 |
| <i>gerKC</i> | 421,302 | 422,525 | + | 98   | 88   | 1.11 | 94   | 92   | 1.03 |
| <i>gerKB</i> | 422,550 | 423,671 | + | 85   | 81   | 1.06 | 90   | 87   | 1.03 |
| <i>yclH</i>  | 423,776 | 424,456 | - | 74   | 72   | 1.03 | 61   | 69   | 0.88 |
| <i>yclI</i>  | 424,472 | 425,932 | - | 95   | 87   | 1.09 | 69   | 90   | 0.77 |
| <i>yclJ</i>  | 426,145 | 426,828 | + | 325  | 301  | 1.08 | 281  | 259  | 1.09 |
| <i>yclK</i>  | 426,815 | 428,236 | + | 587  | 480  | 1.22 | 565  | 533  | 1.06 |
| <i>rapC</i>  | 428,399 | 429,547 | + | 1372 | 1352 | 1.02 | 1102 | 1398 | 0.79 |
| <i>yclM</i>  | 430,191 | 431,555 | - | 444  | 497  | 0.89 | 745  | 687  | 1.08 |
| <i>yclN</i>  | 431,940 | 432,890 | + | 535  | 433  | 1.24 | 529  | 629  | 0.84 |
| <i>yclO</i>  | 432,883 | 433,830 | + | 607  | 428  | 1.42 | 600  | 692  | 0.87 |
| <i>yclP</i>  | 433,824 | 434,582 | + | 1136 | 792  | 1.43 | 1110 | 1307 | 0.85 |
| <i>yclQ</i>  | 434,604 | 435,557 | + | 1253 | 875  | 1.43 | 1383 | 1665 | 0.83 |
| <i>yclnB</i> | 435,604 | 437,022 | - | 294  | 230  | 1.28 | 391  | 342  | 1.14 |
| <i>yclnC</i> | 437,042 | 437,920 | - | 466  | 411  | 1.13 | 494  | 485  | 1.02 |
| <i>yclnD</i> | 438,084 | 438,833 | - | 484  | 734  | 0.66 | 552  | 821  | 0.67 |
| <i>yclnE</i> | 438,850 | 439,137 | + | 456  | 793  | 0.58 | 865  | 1198 | 0.72 |
| <i>yczG</i>  | 439,277 | 439,591 | - | 152  | 175  | 0.87 | 222  | 223  | 1.00 |
| <i>gabR</i>  | 439,593 | 441,032 | - | 64   | 67   | 0.95 | 76   | 79   | 0.96 |
| <i>gabT</i>  | 441,139 | 442,449 | + | 109  | 113  | 0.96 | 94   | 100  | 0.94 |
| <i>gabD</i>  | 442,518 | 443,906 | + | 978  | 832  | 1.18 | 891  | 754  | 1.18 |
| <i>glcU</i>  | 444,029 | 444,892 | + | 54   | 60   | 0.89 | 42   | 59   | 0.71 |
| <i>gdh</i>   | 444,912 | 445,697 | - | 85   | 84   | 1.00 | 68   | 78   | 0.87 |
| <i>yclnI</i> | 445,742 | 446,356 | - | 557  | 496  | 1.12 | 295  | 284  | 1.04 |
| <i>yclnJ</i> | 446,369 | 447,994 | - | 730  | 589  | 1.24 | 348  | 344  | 1.01 |
| <i>yclnK</i> | 448,029 | 448,601 | - | 771  | 575  | 1.34 | 406  | 373  | 1.09 |
| <i>yclnL</i> | 448,766 | 449,119 | + | 202  | 169  | 1.19 | 190  | 207  | 0.92 |
| <i>mtlA</i>  | 449,292 | 451,124 | + | 123  | 200  | 0.62 | 133  | 202  | 0.66 |
| <i>mtlD</i>  | 451,177 | 452,277 | + | 155  | 248  | 0.62 | 143  | 230  | 0.62 |
| <i>yclsA</i> | 452,385 | 453,449 | + | 218  | 262  | 0.83 | 215  | 277  | 0.78 |
| <i>sipU</i>  | 453,584 | 454,147 | + | 108  | 141  | 0.77 | 138  | 205  | 0.68 |
| <i>yczH</i>  | 454,257 | 454,814 | - | 401  | 348  | 1.15 | 337  | 312  | 1.08 |
| <i>yclsD</i> | 454,900 | 455,292 | + | 249  | 242  | 1.03 | 168  | 213  | 0.79 |
| <i>yclsE</i> | 455,622 | 456,371 | + | 477  | 428  | 1.12 | 631  | 644  | 0.98 |
| <i>yclsF</i> | 456,576 | 457,349 | + | 452  | 628  | 0.72 | 447  | 476  | 0.94 |
| <i>yclsG</i> | 457,364 | 458,578 | + | 287  | 479  | 0.60 | 460  | 496  | 0.93 |
| <i>yclsI</i> | 458,584 | 459,375 | + | 183  | 259  | 0.71 | 279  | 313  | 0.89 |
| <i>kipI</i>  | 459,419 | 460,141 | + | 244  | 331  | 0.74 | 424  | 441  | 0.96 |
| <i>kipA</i>  | 460,144 | 461,157 | + | 216  | 257  | 0.84 | 360  | 378  | 0.95 |
| <i>kipR</i>  | 461,173 | 461,913 | + | 267  | 285  | 0.94 | 425  | 476  | 0.89 |
| <i>yclsK</i> | 461,988 | 462,629 | + | 116  | 121  | 0.95 | 228  | 258  | 0.88 |
| <i>yczI</i>  | 462,802 | 463,047 | + | 682  | 589  | 1.16 | 1343 | 1343 | 1.00 |
| <i>yczJ</i>  | 463,053 | 463,340 | - | 756  | 740  | 1.02 | 649  | 563  | 1.15 |
| <i>pbpC</i>  | 463,491 | 465,497 | + | 1671 | 1338 | 1.25 | 1947 | 1791 | 1.09 |
| <i>yclsN</i> | 465,599 | 466,501 | + | 1406 | 1390 | 1.01 | 1512 | 1513 | 1.00 |
| <i>mtlR</i>  | 466,687 | 468,771 | + | 194  | 239  | 0.81 | 220  | 291  | 0.76 |
| <i>ydaB</i>  | 468,982 | 470,379 | + | 265  | 178  | 1.49 | 138  | 118  | 1.18 |
| <i>ydaC</i>  | 470,514 | 471,059 | - | 441  | 252  | 1.75 | 150  | 60   | 2.51 |
| <i>ydaD</i>  | 471,267 | 472,127 | + | 3277 | 1695 | 1.93 | 1633 | 472  | 3.46 |
| <i>ydaE</i>  | 472,143 | 472,646 | + | 2799 | 1366 | 2.05 | 977  | 298  | 3.28 |
| <i>ydaF</i>  | 472,731 | 473,282 | + | 709  | 734  | 0.97 | 645  | 668  | 0.97 |
| <i>ydaG</i>  | 473,360 | 473,782 | + | 7104 | 6456 | 1.10 | 4367 | 2815 | 1.55 |
| <i>ydaH</i>  | 474,288 | 475,097 | + | 126  | 97   | 1.29 | 212  | 187  | 1.14 |
| <i>ydaA</i>  | 475,141 | 475,431 | - | 489  | 393  | 1.24 | 222  | 203  | 1.09 |
| <i>lrpC</i>  | 475,616 | 476,050 | + | 235  | 236  | 0.99 | 191  | 202  | 0.94 |
| <i>topB</i>  | 476,115 | 478,298 | + | 830  | 630  | 1.32 | 897  | 881  | 1.02 |
| <i>ydaJ</i>  | 478,501 | 479,589 | + | 376  | 271  | 1.39 | 180  | 129  | 1.40 |
| <i>ydaK</i>  | 479,570 | 480,421 | + | 287  | 165  | 1.74 | 122  | 98   | 1.25 |
| <i>ydaL</i>  | 480,432 | 482,141 | + | 333  | 167  | 2.00 | 145  | 111  | 1.31 |
| <i>ydaM</i>  | 482,134 | 483,396 | + | 295  | 155  | 1.90 | 153  | 117  | 1.30 |
| <i>ydaN</i>  | 483,402 | 485,513 | + | 245  | 143  | 1.71 | 192  | 133  | 1.44 |
| <i>ydaO</i>  | 485,989 | 487,812 | + | 181  | 164  | 1.10 | 204  | 224  | 0.91 |
| <i>mutT</i>  | 487,871 | 488,320 | + | 104  | 77   | 1.36 | 83   | 75   | 1.11 |
| <i>ydaP</i>  | 488,387 | 490,111 | + | 3986 | 2843 | 1.40 | 2076 | 1020 | 2.03 |
| <i>ydaQ</i>  | 490,288 | 490,578 | + | 150  | 116  | 1.30 | 86   | 72   | 1.20 |
| <i>nntH</i>  | 490,702 | 491,979 | - | 1264 | 1219 | 1.04 | 1049 | 1129 | 0.93 |
| <i>ydaS</i>  | 492,209 | 492,466 | - | 3095 | 2608 | 1.19 | 1814 | 772  | 2.35 |
| <i>ydaT</i>  | 492,544 | 492,996 | - | 2521 | 1709 | 1.47 | 1115 | 475  | 2.35 |
| <i>ydbA</i>  | 493,114 | 493,932 | + | 224  | 216  | 1.04 | 228  | 258  | 0.88 |
| <i>gsiB</i>  | 494,061 | 494,432 | + | 8725 | 9205 | 0.95 | 7340 | 5942 | 1.24 |
| <i>ydbB</i>  | 494,564 | 494,905 | + | 438  | 377  | 1.16 | 478  | 439  | 1.09 |
| <i>ydbC</i>  | 494,899 | 495,258 | + | 352  | 276  | 1.28 | 392  | 354  | 1.11 |
| <i>ydbD</i>  | 495,295 | 496,116 | - | 2043 | 1963 | 1.04 | 1486 | 789  | 1.88 |
| <i>dctB</i>  | 496,207 | 497,259 | - | 143  | 173  | 0.83 | 190  | 250  | 0.76 |
| <i>dctS</i>  | 497,329 | 498,936 | + | 142  | 141  | 1.01 | 172  | 222  | 0.78 |
| <i>dctR</i>  | 498,926 | 499,606 | + | 142  | 151  | 0.94 | 189  | 263  | 0.72 |
| <i>dctP</i>  | 499,727 | 500,992 | + | 109  | 118  | 0.93 | 151  | 189  | 0.80 |
| <i>ydbI</i>  | 501,140 | 502,192 | + | 382  | 331  | 1.16 | 482  | 506  | 0.95 |
| <i>ydbJ</i>  | 502,469 | 503,395 | + | 626  | 461  | 1.36 | 754  | 707  | 1.07 |
| <i>ydbK</i>  | 503,415 | 504,155 | + | 537  | 357  | 1.51 | 554  | 509  | 1.09 |
| <i>ydbL</i>  | 504,250 | 504,585 | + | 1274 | 1363 | 0.93 | 704  | 549  | 1.28 |
| <i>ydbM</i>  | 504,713 | 505,858 | + | 943  | 888  | 1.06 | 681  | 615  | 1.11 |
| <i>ydbN</i>  | 505,883 | 506,062 | - | 925  | 2020 | 0.46 | 274  | 570  | 0.48 |
| <i>ydbO</i>  | 506,427 | 507,299 | + | 444  | 323  | 1.37 | 640  | 612  | 1.05 |

|             |         |         |   |      |      |      |      |      |      |              |
|-------------|---------|---------|---|------|------|------|------|------|------|--------------|
| <i>ydbP</i> | 507,314 | 507,634 | - | 695  | 681  | 1.02 | 697  | 598  | 1.16 |              |
| <i>ddl</i>  | 507,809 | 508,873 | + | 891  | 765  | 1.17 | 1079 | 989  | 1.09 |              |
| <i>murF</i> | 508,945 | 510,318 | + | 503  | 382  | 1.32 | 741  | 579  | 1.28 |              |
| <i>ydbR</i> | 510,667 | 512,202 | + | 2613 | 2153 | 1.21 | 2762 | 3045 | 0.91 |              |
| <i>ydbS</i> | 512,375 | 512,854 | + | 1093 | 979  | 1.12 | 1768 | 1851 | 0.96 |              |
| <i>ydbT</i> | 512,844 | 514,325 | - | 660  | 614  | 1.07 | 1236 | 1353 | 0.91 |              |
| <i>ydcA</i> | 514,577 | 515,176 | - | 162  | 154  | 1.05 | 137  | 176  | 0.78 |              |
| <i>acpS</i> | 515,271 | 515,636 | + | 278  | 258  | 1.08 | 473  | 490  | 0.96 |              |
| <i>ydcC</i> | 515,697 | 516,818 | + | 214  | 200  | 1.07 | 386  | 414  | 0.93 |              |
| <i>alr</i>  | 516,933 | 518,102 | + | 537  | 477  | 1.13 | 891  | 831  | 1.07 |              |
| <i>ydcD</i> | 518,218 | 518,499 | + | 3521 | 3653 | 0.96 | 5338 | 5639 | 0.95 |              |
| <i>ydcE</i> | 518,504 | 518,854 | + | 1398 | 1496 | 0.93 | 2841 | 3074 | 0.92 |              |
| <i>rsbR</i> | 518,969 | 519,793 | + | 542  | 499  | 1.08 | 844  | 895  | 0.94 |              |
| <i>rsbS</i> | 519,798 | 520,163 | + | 683  | 611  | 1.12 | 1163 | 1130 | 1.03 |              |
| <i>rsbT</i> | 520,167 | 520,568 | + | 754  | 718  | 1.05 | 1497 | 1394 | 1.07 |              |
| <i>rsbU</i> | 520,580 | 521,587 | + | 710  | 707  | 1.00 | 1420 | 1310 | 1.08 |              |
| <i>rsbV</i> | 521,649 | 521,978 | + | 6080 | 6754 | 0.90 | 4162 | 3609 | 1.15 |              |
| <i>rsbW</i> | 521,975 | 522,457 | + | 7110 | 7593 | 0.94 | 4396 | 3927 | 1.12 |              |
| <i>sigB</i> | 522,417 | 523,211 | + | 6982 | 7503 | 0.93 | 3774 | 3383 | 1.12 |              |
| <i>rsbX</i> | 523,211 | 523,810 | + | 7202 | 7516 | 0.96 | 4242 | 3909 | 1.09 |              |
| <i>ydcF</i> | 524,053 | 524,346 | + | 149  | 155  | 0.96 | 96   | 126  | 0.76 |              |
| <i>ydcG</i> | 524,343 | 524,783 | + | 261  | 266  | 0.98 | 211  | 236  | 0.89 |              |
| <i>ydcH</i> | 524,767 | 525,210 | + | 119  | 121  | 0.99 | 87   | 93   | 0.93 |              |
| <i>ydcI</i> | 525,304 | 527,463 | + | 363  | 268  | 1.36 | 600  | 508  | 1.18 |              |
| <i>ydcK</i> | 527,690 | 528,142 | + | 244  | 207  | 1.18 | 241  | 274  | 0.88 |              |
| <i>ydcL</i> | 529,066 | 530,172 | - | 213  | 185  | 1.15 | 363  | 421  | 0.86 |              |
| <i>ydcM</i> | 530,185 | 530,694 | - | 256  | 216  | 1.19 | 361  | 423  | 0.85 |              |
| <i>ydcN</i> | 530,691 | 531,074 | - | 174  | 173  | 1.01 | 239  | 270  | 0.88 |              |
| <i>sacV</i> | 531,348 | 531,542 | + | 849  | 309  | 2.75 | 1079 | 655  | 1.65 |              |
| <i>ydcO</i> | 531,853 | 532,113 | + | 431  | 144  | 3.00 | 702  | 311  | 2.26 |              |
| <i>ydcP</i> | 532,483 | 532,863 | + | 929  | 328  | 2.83 | 1192 | 617  | 1.93 |              |
| <i>ydcQ</i> | 532,899 | 534,341 | + | 327  | 136  | 2.41 | 430  | 241  | 1.78 |              |
| <i>ydcR</i> | 534,334 | 535,392 | + | 340  | 138  | 2.47 | 526  | 274  | 1.92 |              |
| <i>ydcS</i> | 535,657 | 535,926 | + | 326  | 157  | 2.08 | 571  | 327  | 1.75 |              |
| <i>ydcT</i> | 535,965 | 536,231 | + | 675  | 259  | 2.60 | 929  | 455  | 2.04 |              |
| <i>yddA</i> | 536,248 | 536,556 | + | 320  | 139  | 2.29 | 574  | 317  | 1.81 |              |
| <i>yddB</i> | 536,546 | 537,610 | + | 352  | 150  | 2.34 | 604  | 319  | 1.90 |              |
| <i>yddC</i> | 537,622 | 537,870 | + | 374  | 218  | 1.71 | 746  | 336  | 2.22 |              |
| <i>yddD</i> | 537,883 | 538,407 | + | 275  | 109  | 2.53 | 351  | 200  | 1.76 |              |
| <i>yddE</i> | 538,295 | 540,790 | + | 176  | 87   | 2.02 | 259  | 153  | 1.69 |              |
| <i>yddF</i> | 540,809 | 541,135 | + | 119  | 57   | 2.09 | 271  | 142  | 1.91 |              |
| <i>yddG</i> | 541,139 | 543,586 | + | 196  | 105  | 1.86 | 310  | 177  | 1.76 |              |
| <i>yddH</i> | 543,583 | 544,572 | + | 173  | 106  | 1.64 | 242  | 155  | 1.56 |              |
| <i>yddI</i> | 544,587 | 545,093 | + | 136  | 74   | 1.83 | 208  | 114  | 1.83 |              |
| <i>yddJ</i> | 545,156 | 545,536 | + | 618  | 487  | 1.27 | 672  | 464  | 1.45 |              |
| <i>yddK</i> | 545,727 | 546,527 | - | 208  | 202  | 1.03 | 271  | 324  | 0.84 | AbrB regulon |
| <i>rapI</i> | 546,867 | 548,042 | + | 297  | 199  | 1.49 | 294  | 226  | 1.30 |              |
| <i>yddM</i> | 548,271 | 549,212 | + | 260  | 184  | 1.41 | 335  | 276  | 1.21 |              |
| <i>yddN</i> | 549,783 | 550,802 | - | 56   | 50   | 1.13 | 62   | 60   | 1.04 |              |
| <i>lrpA</i> | 551,062 | 551,472 | + | 96   | 90   | 1.07 | 148  | 180  | 0.82 |              |
| <i>lrpB</i> | 551,595 | 552,044 | - | 29   | 33   | 0.87 | 37   | 37   | 1.00 |              |
| <i>yddQ</i> | 552,159 | 552,701 | + | 78   | 75   | 1.04 | 113  | 105  | 1.07 |              |
| <i>yddR</i> | 553,254 | 554,018 | + | 84   | 82   | 1.03 | 82   | 76   | 1.08 |              |
| <i>yddS</i> | 554,212 | 555,522 | + | 122  | 120  | 1.01 | 119  | 112  | 1.07 |              |
| <i>yddT</i> | 556,306 | 556,992 | + | 960  | 933  | 1.03 | 1453 | 1182 | 1.23 | AbrB regulon |
| <i>ydeA</i> | 557,952 | 558,545 | + | 98   | 93   | 1.06 | 116  | 105  | 1.11 |              |
| <i>cspC</i> | 558,808 | 559,008 | + | 997  | 1149 | 0.87 | 1750 | 2267 | 0.77 |              |
| <i>ydeB</i> | 559,695 | 560,156 | - | 1297 | 1157 | 1.12 | 781  | 1037 | 0.75 |              |
| <i>ydeE</i> | 560,724 | 560,960 | - | 60   | 57   | 1.06 | 70   | 79   | 0.89 |              |
| <i>ydeC</i> | 561,058 | 561,933 | - | 73   | 78   | 0.94 | 80   | 94   | 0.85 |              |
| <i>ydeD</i> | 562,046 | 563,005 | - | 44   | 57   | 0.77 | 48   | 54   | 0.90 |              |
| <i>ydeE</i> | 563,158 | 564,030 | - | 76   | 73   | 1.04 | 98   | 104  | 0.95 |              |
| <i>ydeF</i> | 564,248 | 565,645 | + | 76   | 87   | 0.87 | 91   | 103  | 0.89 |              |
| <i>ydeG</i> | 565,755 | 567,047 | + | 54   | 63   | 0.86 | 59   | 66   | 0.89 |              |
| <i>ydeH</i> | 567,206 | 567,652 | + | 82   | 70   | 1.17 | 175  | 185  | 0.94 | AbrB regulon |
| <i>ydeI</i> | 567,889 | 568,482 | + | 88   | 103  | 0.85 | 90   | 105  | 0.86 |              |
| <i>ydeJ</i> | 568,834 | 569,493 | - | 379  | 396  | 0.96 | 373  | 444  | 0.84 | AbrB regulon |
| <i>ydeK</i> | 569,915 | 570,778 | - | 93   | 109  | 0.86 | 76   | 83   | 0.92 |              |
| <i>ydeL</i> | 570,933 | 572,324 | + | 73   | 68   | 1.08 | 86   | 92   | 0.94 |              |
| <i>ydeM</i> | 572,518 | 572,943 | + | 362  | 268  | 1.35 | 409  | 452  | 0.90 |              |
| <i>ydeN</i> | 572,996 | 573,568 | - | 201  | 198  | 1.01 | 232  | 215  | 1.08 |              |
| <i>ydeF</i> | 573,650 | 573,979 | - | 230  | 225  | 1.02 | 214  | 192  | 1.11 |              |
| <i>ydeO</i> | 574,234 | 575,106 | + | 632  | 422  | 1.50 | 828  | 779  | 1.06 |              |
| <i>ydeP</i> | 575,256 | 575,642 | - | 115  | 94   | 1.22 | 129  | 160  | 0.81 |              |
| <i>ydeQ</i> | 575,753 | 576,346 | + | 203  | 183  | 1.11 | 139  | 114  | 1.22 |              |
| <i>ydeR</i> | 576,490 | 577,677 | - | 41   | 45   | 0.92 | 40   | 44   | 0.91 |              |
| <i>ydeS</i> | 577,881 | 578,477 | + | 254  | 222  | 1.15 | 257  | 314  | 0.82 |              |
| <i>ydeT</i> | 579,085 | 579,420 | + | 109  | 131  | 0.83 | 152  | 175  | 0.87 |              |
| <i>ydfA</i> | 579,433 | 580,740 | + | 135  | 143  | 0.94 | 202  | 229  | 0.88 |              |
| <i>ydfB</i> | 581,238 | 582,023 | + | 60   | 57   | 1.07 | 67   | 60   | 1.12 |              |
| <i>ydfC</i> | 582,080 | 583,000 | - | 31   | 33   | 0.92 | 29   | 32   | 0.91 |              |
| <i>ydfD</i> | 583,133 | 584,581 | + | 54   | 61   | 0.88 | 68   | 70   | 0.96 |              |
| <i>ydfE</i> | 584,699 | 585,322 | - | 69   | 73   | 0.93 | 78   | 106  | 0.74 |              |
| <i>ydfF</i> | 585,412 | 586,092 | + | 210  | 198  | 1.06 | 224  | 236  | 0.95 |              |
| <i>ydfG</i> | 586,172 | 586,615 | - | 375  | 430  | 0.87 | 613  | 590  | 1.04 |              |
| <i>ydfH</i> | 587,288 | 588,511 | + | 142  | 125  | 1.14 | 173  | 171  | 1.01 |              |
| <i>ydfI</i> | 588,504 | 589,145 | + | 135  | 116  | 1.17 | 195  | 203  | 0.96 |              |
| <i>ydfJ</i> | 589,261 | 591,435 | + | 52   | 56   | 0.92 | 54   | 58   | 0.93 |              |
| <i>nap</i>  | 591,847 | 592,749 | - | 562  | 397  | 1.41 | 405  | 420  | 0.97 |              |
| <i>ydfK</i> | 592,951 | 593,640 | - | 35   | 39   | 0.89 | 41   | 40   | 1.02 |              |
| <i>ydfL</i> | 593,730 | 594,542 | - | 126  | 127  | 0.99 | 145  | 139  | 1.04 |              |

|              |         |         |   |      |      |      |      |      |      |              |
|--------------|---------|---------|---|------|------|------|------|------|------|--------------|
| <i>ydjM</i>  | 594,653 | 595,546 | - | 38   | 41   | 0.93 | 46   | 46   | 0.99 |              |
| <i>ydjN</i>  | 596,022 | 596,642 | + | 121  | 127  | 0.95 | 120  | 183  | 0.66 |              |
| <i>ydjO</i>  | 596,658 | 597,596 | + | 250  | 180  | 1.39 | 135  | 209  | 0.65 |              |
| <i>ydjP</i>  | 597,698 | 598,087 | + | 178  | 157  | 1.13 | 136  | 197  | 0.69 |              |
| <i>ydjQ</i>  | 598,273 | 598,611 | + | 44   | 44   | 1.00 | 44   | 40   | 1.11 |              |
| <i>yzdH</i>  | 598,651 | 598,887 | - | 25   | 31   | 0.80 | 23   | 21   | 1.06 |              |
| <i>ydjR</i>  | 599,773 | 600,450 | - | 37   | 44   | 0.83 | 33   | 42   | 0.78 |              |
| <i>ydjS</i>  | 600,563 | 601,270 | + | 46   | 50   | 0.92 | 50   | 53   | 0.94 |              |
| <i>cotP</i>  | 601,285 | 601,716 | - | 27   | 32   | 0.85 | 27   | 28   | 0.97 |              |
| <i>ydjA</i>  | 601,729 | 601,971 | - | 20   | 25   | 0.79 | 23   | 26   | 0.86 |              |
| <i>ydjB</i>  | 601,985 | 602,257 | - | 21   | 30   | 0.71 | 23   | 26   | 0.88 |              |
| <i>ydjC</i>  | 602,556 | 603,143 | + | 610  | 470  | 1.30 | 1190 | 1252 | 0.95 |              |
| <i>ydjD</i>  | 603,140 | 603,484 | + | 338  | 278  | 1.21 | 832  | 729  | 1.14 |              |
| <i>ydjE</i>  | 603,647 | 604,120 | + | 240  | 227  | 1.06 | 553  | 527  | 1.05 |              |
| <i>expZ</i>  | 604,280 | 605,923 | - | 346  | 445  | 0.78 | 244  | 254  | 0.96 |              |
| <i>ydjF</i>  | 606,243 | 607,619 | - | 317  | 307  | 1.03 | 345  | 348  | 0.99 |              |
| <i>dinB</i>  | 607,791 | 608,309 | - | 1467 | 992  | 1.48 | 1400 | 966  | 1.45 |              |
| <i>ydjG</i>  | 608,478 | 608,936 | + | 52   | 51   | 1.00 | 99   | 108  | 0.92 |              |
| <i>ydjH</i>  | 608,933 | 611,590 | + | 161  | 139  | 1.15 | 236  | 209  | 1.13 |              |
| <i>ydjI</i>  | 611,736 | 612,365 | - | 117  | 116  | 1.01 | 190  | 213  | 0.89 |              |
| <i>ydjJ</i>  | 612,381 | 612,875 | - | 155  | 170  | 0.91 | 221  | 255  | 0.87 |              |
| <i>ydjK</i>  | 613,186 | 614,394 | + | 109  | 103  | 1.06 | 149  | 162  | 0.92 |              |
| <i>ydjL</i>  | 614,389 | 615,168 | - | 260  | 197  | 1.32 | 131  | 119  | 1.10 |              |
| <i>ydjM</i>  | 615,417 | 616,091 | + | 334  | 354  | 0.94 | 298  | 365  | 0.81 |              |
| <i>ydjN</i>  | 616,218 | 617,537 | + | 99   | 87   | 1.14 | 79   | 84   | 0.94 |              |
| <i>ydjO</i>  | 617,683 | 618,828 | + | 281  | 251  | 1.12 | 169  | 179  | 0.94 |              |
| <i>ydjP</i>  | 618,867 | 619,577 | - | 46   | 45   | 1.01 | 43   | 40   | 1.07 |              |
| <i>phoB</i>  | 619,643 | 621,031 | - | 92   | 91   | 1.01 | 82   | 87   | 0.94 |              |
| <i>ydjQ</i>  | 621,393 | 621,764 | + | 279  | 268  | 1.04 | 416  | 384  | 1.09 |              |
| <i>ydjR</i>  | 621,840 | 622,337 | - | 166  | 159  | 1.04 | 152  | 164  | 0.93 |              |
| <i>ydjS</i>  | 622,355 | 622,837 | - | 143  | 140  | 1.02 | 110  | 116  | 0.94 |              |
| <i>ydjT</i>  | 622,920 | 623,897 | + | 209  | 160  | 1.31 | 223  | 186  | 1.20 |              |
| <i>ydjU</i>  | 624,039 | 624,656 | + | 3966 | 3357 | 1.18 | 2076 | 1848 | 1.12 |              |
| <i>ydjV</i>  | 624,672 | 625,838 | - | 67   | 72   | 0.93 | 46   | 54   | 0.86 |              |
| <i>ydjW</i>  | 626,169 | 626,480 | + | 84   | 87   | 0.97 | 87   | 96   | 0.91 | AbrB regulon |
| <i>ydjX</i>  | 626,480 | 626,812 | + | 51   | 54   | 0.95 | 42   | 49   | 0.87 | AbrB regulon |
| <i>ydjY</i>  | 626,831 | 628,159 | + | 73   | 77   | 0.95 | 65   | 75   | 0.87 | AbrB regulon |
| <i>ydjZ</i>  | 628,177 | 629,574 | + | 84   | 88   | 0.95 | 73   | 84   | 0.86 | AbrB regulon |
| <i>ydj1</i>  | 629,717 | 630,430 | + | 188  | 142  | 1.33 | 139  | 147  | 0.95 | AbrB regulon |
| <i>ydj2</i>  | 630,459 | 631,358 | + | 186  | 156  | 1.19 | 147  | 159  | 0.92 | AbrB regulon |
| <i>ydj3</i>  | 631,355 | 632,302 | + | 161  | 118  | 1.36 | 121  | 129  | 0.94 | AbrB regulon |
| <i>ydj4</i>  | 632,321 | 633,409 | + | 150  | 113  | 1.32 | 116  | 118  | 0.98 | AbrB regulon |
| <i>ydj5</i>  | 633,470 | 633,925 | - | 26   | 31   | 0.83 | 32   | 33   | 0.97 |              |
| <i>thiL</i>  | 640,209 | 641,186 | + | 269  | 243  | 1.11 | 350  | 363  | 0.96 |              |
| <i>ydiB</i>  | 641,201 | 641,677 | + | 192  | 173  | 1.11 | 356  | 367  | 0.97 |              |
| <i>ydiC</i>  | 641,658 | 642,347 | + | 360  | 283  | 1.27 | 521  | 498  | 1.05 |              |
| <i>ydiD</i>  | 642,357 | 642,812 | + | 432  | 337  | 1.28 | 738  | 667  | 1.11 |              |
| <i>gcp</i>   | 642,805 | 643,845 | + | 464  | 361  | 1.29 | 684  | 585  | 1.17 |              |
| <i>ydiF</i>  | 644,075 | 646,003 | - | 567  | 456  | 1.24 | 594  | 442  | 1.34 |              |
| <i>ydiG</i>  | 646,129 | 646,641 | + | 565  | 464  | 1.22 | 617  | 667  | 0.93 |              |
| <i>ydiH</i>  | 646,638 | 647,285 | + | 727  | 637  | 1.14 | 702  | 745  | 0.94 |              |
| <i>tatAY</i> | 647,307 | 647,480 | + | 602  | 526  | 1.14 | 662  | 963  | 0.69 |              |
| <i>tatCY</i> | 647,487 | 648,251 | + | 683  | 695  | 0.98 | 508  | 581  | 0.87 |              |
| <i>ydiK</i>  | 648,289 | 648,480 | - | 85   | 112  | 0.75 | 220  | 293  | 0.75 |              |
| <i>ydiL</i>  | 648,477 | 649,211 | - | 392  | 347  | 1.13 | 366  | 408  | 0.90 |              |
| <i>groES</i> | 649,450 | 649,734 | + | 4071 | 4357 | 0.93 | 4948 | 4652 | 1.06 |              |
| <i>groEL</i> | 649,781 | 651,415 | + | 2937 | 3165 | 0.93 | 3506 | 3522 | 1.00 |              |
| <i>ydiM</i>  | 652,979 | 653,359 | + | 197  | 153  | 1.29 | 252  | 196  | 1.29 |              |
| <i>ydiN</i>  | 654,526 | 654,741 | + | 275  | 208  | 1.33 | 341  | 269  | 1.27 |              |
| <i>ydiO</i>  | 654,771 | 656,054 | + | 712  | 498  | 1.43 | 660  | 548  | 1.20 |              |
| <i>ydiP</i>  | 656,076 | 657,245 | + | 1074 | 692  | 1.55 | 1075 | 891  | 1.21 |              |
| <i>ydiQ</i>  | 657,731 | 657,919 | + | 37   | 30   | 1.24 | 29   | 32   | 0.89 |              |
| <i>ydiR</i>  | 659,171 | 660,112 | + | 718  | 612  | 1.17 | 944  | 950  | 0.99 |              |
| <i>ydiS</i>  | 660,144 | 661,175 | + | 873  | 654  | 1.33 | 1130 | 1092 | 1.03 |              |
| <i>ydjA</i>  | 661,178 | 662,575 | + | 610  | 469  | 1.30 | 853  | 855  | 1.00 |              |
| <i>ydjB</i>  | 663,149 | 663,484 | + | 77   | 70   | 1.10 | 162  | 169  | 0.96 |              |
| <i>ydjC</i>  | 663,867 | 664,217 | + | 47   | 44   | 1.06 | 68   | 70   | 0.97 |              |
| <i>gutR</i>  | 664,323 | 666,812 | - | 228  | 237  | 0.96 | 264  | 266  | 0.99 |              |
| <i>gutB</i>  | 667,014 | 668,075 | + | 164  | 167  | 0.98 | 141  | 159  | 0.88 |              |
| <i>gutP</i>  | 668,149 | 669,540 | + | 64   | 65   | 0.98 | 74   | 72   | 1.02 |              |
| <i>ydjE</i>  | 669,635 | 670,597 | + | 1007 | 934  | 1.08 | 1237 | 1121 | 1.10 |              |
| <i>pspA</i>  | 670,793 | 671,476 | + | 1625 | 1423 | 1.14 | 2698 | 2563 | 1.05 | AbrB regulon |
| <i>ydjG</i>  | 671,542 | 672,567 | + | 1108 | 903  | 1.23 | 2258 | 2332 | 0.97 | AbrB regulon |
| <i>ydjH</i>  | 672,567 | 673,331 | + | 1025 | 808  | 1.27 | 2224 | 2259 | 0.98 | AbrB regulon |
| <i>ydjI</i>  | 673,362 | 674,333 | + | 1041 | 851  | 1.22 | 1929 | 1939 | 0.99 | AbrB regulon |
| <i>ydjJ</i>  | 674,380 | 675,405 | - | 966  | 622  | 1.55 | 238  | 93   | 2.55 |              |
| <i>ydjK</i>  | 675,990 | 677,411 | + | 60   | 59   | 1.02 | 52   | 58   | 0.89 |              |
| <i>ydjL</i>  | 677,459 | 678,499 | - | 4727 | 4574 | 1.03 | 4126 | 3608 | 1.14 | AbrB regulon |
| <i>ydjM</i>  | 678,938 | 679,309 | + | 185  | 116  | 1.59 | 457  | 482  | 0.95 |              |
| <i>ydjN</i>  | 679,375 | 680,421 | + | 305  | 187  | 1.63 | 760  | 695  | 1.09 |              |
| <i>ydjO</i>  | 680,803 | 681,012 | - | 4406 | 3972 | 1.11 | 4370 | 4069 | 1.07 |              |
| <i>ydjP</i>  | 681,095 | 681,910 | - | 532  | 427  | 1.25 | 912  | 832  | 1.10 |              |
| <i>yeaA</i>  | 681,923 | 682,912 | - | 373  | 338  | 1.10 | 661  | 611  | 1.08 |              |
| <i>cotA</i>  | 683,010 | 684,551 | - | 144  | 145  | 1.00 | 123  | 134  | 0.92 |              |
| <i>gabP</i>  | 684,703 | 686,112 | - | 1111 | 1126 | 0.99 | 1010 | 1108 | 0.91 |              |
| <i>yeaB</i>  | 686,510 | 687,382 | + | 105  | 111  | 0.95 | 109  | 128  | 0.85 |              |
| <i>yeaC</i>  | 687,535 | 688,497 | + | 284  | 241  | 1.18 | 280  | 294  | 0.95 |              |
| <i>yeaD</i>  | 688,881 | 689,693 | + | 357  | 241  | 1.48 | 508  | 457  | 1.11 |              |
| <i>yeaE</i>  | 689,890 | 691,857 | + | 351  | 247  | 1.42 | 555  | 496  | 1.12 |              |
| <i>guaA</i>  | 692,090 | 693,631 | + | 1205 | 1089 | 1.11 | 1590 | 1710 | 0.93 |              |
| <i>pbuG</i>  | 694,011 | 695,333 | + | 119  | 140  | 0.85 | 313  | 505  | 0.62 |              |

|              |         |         |   |      |      |      |      |      |      |               |
|--------------|---------|---------|---|------|------|------|------|------|------|---------------|
| <i>yebC</i>  | 695,535 | 696,338 | + | 279  | 260  | 1.07 | 363  | 321  | 1.13 |               |
| <i>yebD</i>  | 696,497 | 696,790 | + | 93   | 99   | 0.94 | 66   | 50   | 1.32 |               |
| <i>yebE</i>  | 696,880 | 697,434 | + | 921  | 875  | 1.05 | 462  | 214  | 2.16 |               |
| <i>yebG</i>  | 697,434 | 697,631 | + | 772  | 724  | 1.07 | 393  | 319  | 1.23 |               |
| <i>purE</i>  | 697,954 | 698,442 | + | 492  | 520  | 0.95 | 918  | 1289 | 0.71 |               |
| <i>purK</i>  | 698,435 | 699,574 | + | 562  | 554  | 1.01 | 1376 | 1765 | 0.78 |               |
| <i>purB</i>  | 699,571 | 700,866 | + | 1040 | 1006 | 1.03 | 2301 | 2698 | 0.85 |               |
| <i>purC</i>  | 700,939 | 701,664 | + | 1442 | 1493 | 0.97 | 2945 | 3244 | 0.91 |               |
| <i>purS</i>  | 701,657 | 701,911 | + | 1180 | 1219 | 0.97 | 2507 | 2960 | 0.85 |               |
| <i>purQ</i>  | 701,908 | 702,591 | + | 1028 | 1063 | 0.97 | 2110 | 2641 | 0.80 |               |
| <i>purL</i>  | 702,575 | 704,803 | + | 1657 | 1836 | 0.90 | 2777 | 3174 | 0.87 |               |
| <i>purF</i>  | 704,779 | 706,209 | + | 2247 | 2596 | 0.87 | 3061 | 3427 | 0.89 |               |
| <i>purM</i>  | 706,311 | 707,351 | + | 2019 | 2235 | 0.90 | 2680 | 2967 | 0.90 |               |
| <i>purN</i>  | 707,348 | 707,935 | + | 2064 | 2240 | 0.92 | 2411 | 2705 | 0.89 |               |
| <i>purH</i>  | 707,932 | 709,470 | + | 2746 | 3005 | 0.91 | 3023 | 3342 | 0.90 |               |
| <i>purD</i>  | 709,486 | 710,754 | + | 2091 | 2292 | 0.91 | 2359 | 2546 | 0.93 |               |
| <i>yezC</i>  | 710,957 | 711,214 | - | 180  | 189  | 0.95 | 173  | 202  | 0.86 |               |
| <i>yeaA</i>  | 711,358 | 712,749 | + | 85   | 96   | 0.89 | 77   | 85   | 0.91 |               |
| <i>yeaA</i>  | 713,003 | 714,745 | + | 658  | 645  | 1.02 | 456  | 419  | 1.09 |               |
| <i>yerB</i>  | 714,772 | 715,767 | + | 1315 | 1417 | 0.93 | 1752 | 1941 | 0.90 | Spo0A regulon |
| <i>yerC</i>  | 715,770 | 716,084 | + | 77   | 101  | 0.76 | 180  | 177  | 1.02 |               |
| <i>yerD</i>  | 716,119 | 717,696 | - | 2278 | 1325 | 1.72 | 734  | 288  | 2.55 |               |
| <i>pcrB</i>  | 717,961 | 718,647 | + | 378  | 328  | 1.15 | 533  | 621  | 0.86 |               |
| <i>pcrA</i>  | 718,709 | 720,928 | + | 576  | 392  | 1.47 | 1000 | 906  | 1.10 |               |
| <i>ligA</i>  | 720,952 | 722,958 | + | 674  | 520  | 1.30 | 1212 | 997  | 1.22 |               |
| <i>yerH</i>  | 722,974 | 724,164 | + | 675  | 571  | 1.18 | 1317 | 1117 | 1.18 |               |
| <i>yerI</i>  | 724,326 | 725,336 | + | 1961 | 1745 | 1.12 | 2165 | 2138 | 1.01 | AbrB regulon  |
| <i>sapB</i>  | 725,374 | 726,072 | - | 265  | 220  | 1.20 | 228  | 226  | 1.01 |               |
| <i>opuE</i>  | 726,179 | 727,657 | - | 1551 | 1102 | 1.41 | 1093 | 1024 | 1.07 |               |
| <i>gatC</i>  | 728,071 | 728,361 | + | 1886 | 1958 | 0.96 | 2853 | 3148 | 0.91 |               |
| <i>gatA</i>  | 728,377 | 729,834 | + | 1600 | 1580 | 1.01 | 2433 | 2518 | 0.97 |               |
| <i>gatB</i>  | 729,848 | 731,278 | + | 1471 | 1593 | 0.92 | 2253 | 2336 | 0.96 |               |
| <i>yerO</i>  | 731,293 | 732,162 | - | 89   | 100  | 0.90 | 95   | 122  | 0.78 |               |
| <i>yerP</i>  | 732,255 | 735,452 | + | 936  | 829  | 1.13 | 2080 | 2225 | 0.93 |               |
| <i>yerQ</i>  | 735,775 | 736,686 | + | 482  | 450  | 1.07 | 580  | 648  | 0.90 |               |
| <i>yefA</i>  | 736,942 | 738,321 | + | 316  | 264  | 1.20 | 467  | 469  | 1.00 |               |
| <i>yefB</i>  | 738,334 | 739,236 | - | 34   | 38   | 0.88 | 38   | 37   | 1.01 |               |
| <i>yefC</i>  | 739,175 | 739,552 | + | 59   | 51   | 1.17 | 108  | 100  | 1.08 |               |
| <i>yeaA</i>  | 739,627 | 742,266 | + | 119  | 93   | 1.28 | 196  | 173  | 1.13 |               |
| <i>yeaB</i>  | 742,278 | 744,074 | + | 404  | 291  | 1.39 | 609  | 477  | 1.28 |               |
| <i>yeaC</i>  | 744,187 | 745,335 | + | 399  | 332  | 1.20 | 561  | 481  | 1.17 |               |
| <i>yeaD</i>  | 745,597 | 745,902 | - | 64   | 59   | 1.09 | 54   | 53   | 1.01 |               |
| <i>yeaA</i>  | 745,969 | 746,175 | - | 84   | 74   | 1.13 | 60   | 75   | 0.81 |               |
| <i>yeaF</i>  | 746,415 | 748,898 | - | 474  | 436  | 1.09 | 552  | 521  | 1.06 |               |
| <i>yeaG</i>  | 749,034 | 750,131 | + | 53   | 61   | 0.86 | 52   | 61   | 0.85 |               |
| <i>rapH</i>  | 750,293 | 751,588 | + | 2072 | 1753 | 1.18 | 2141 | 1839 | 1.16 | AbrB regulon  |
| <i>yeaI</i>  | 751,749 | 752,468 | + | 1688 | 1530 | 1.10 | 2176 | 2243 | 0.97 |               |
| <i>yeaK</i>  | 752,602 | 753,039 | + | 96   | 98   | 0.98 | 108  | 111  | 0.97 |               |
| <i>yezE</i>  | 753,154 | 753,738 | + | 594  | 671  | 0.89 | 883  | 986  | 0.90 |               |
| <i>yesE</i>  | 753,817 | 754,260 | + | 96   | 114  | 0.84 | 130  | 163  | 0.80 |               |
| <i>yesF</i>  | 754,257 | 755,117 | + | 125  | 126  | 0.99 | 133  | 142  | 0.94 |               |
| <i>cotJA</i> | 755,244 | 755,492 | + | 41   | 57   | 0.72 | 47   | 65   | 0.72 |               |
| <i>cotJB</i> | 755,437 | 755,739 | + | 35   | 43   | 0.80 | 35   | 38   | 0.92 |               |
| <i>cotJC</i> | 755,754 | 756,323 | + | 216  | 210  | 1.03 | 120  | 151  | 0.79 |               |
| <i>yesJ</i>  | 756,448 | 756,990 | + | 347  | 328  | 1.06 | 407  | 403  | 1.01 |               |
| <i>yesK</i>  | 756,926 | 757,315 | + | 98   | 94   | 1.04 | 66   | 86   | 0.76 |               |
| <i>yesL</i>  | 757,430 | 758,059 | + | 90   | 95   | 0.94 | 92   | 105  | 0.88 |               |
| <i>yesM</i>  | 758,056 | 759,789 | + | 78   | 83   | 0.93 | 72   | 87   | 0.84 |               |
| <i>yesN</i>  | 759,789 | 760,895 | + | 95   | 92   | 1.04 | 79   | 88   | 0.89 |               |
| <i>yesO</i>  | 761,044 | 762,282 | + | 97   | 104  | 0.93 | 77   | 89   | 0.86 |               |
| <i>yesP</i>  | 762,279 | 763,208 | + | 84   | 90   | 0.93 | 72   | 88   | 0.82 |               |
| <i>yesQ</i>  | 763,212 | 764,102 | + | 78   | 80   | 0.98 | 62   | 70   | 0.88 |               |
| <i>yesR</i>  | 764,118 | 765,152 | + | 146  | 148  | 0.99 | 128  | 172  | 0.74 |               |
| <i>yesS</i>  | 765,175 | 767,460 | + | 127  | 127  | 1.00 | 103  | 112  | 0.93 |               |
| <i>yesT</i>  | 767,474 | 768,172 | + | 105  | 111  | 0.95 | 89   | 107  | 0.83 |               |
| <i>yesU</i>  | 768,165 | 768,827 | + | 97   | 86   | 1.14 | 63   | 74   | 0.85 |               |
| <i>yesV</i>  | 768,824 | 769,450 | + | 89   | 80   | 1.11 | 65   | 67   | 0.96 |               |
| <i>yesW</i>  | 769,571 | 771,433 | + | 118  | 123  | 0.97 | 84   | 107  | 0.79 |               |
| <i>yesX</i>  | 771,479 | 773,317 | + | 131  | 127  | 1.03 | 96   | 123  | 0.78 |               |
| <i>yesY</i>  | 773,475 | 774,128 | + | 88   | 89   | 0.99 | 64   | 76   | 0.85 |               |
| <i>yesZ</i>  | 774,136 | 776,127 | + | 117  | 115  | 1.01 | 86   | 100  | 0.86 |               |
| <i>yetA</i>  | 776,171 | 778,744 | + | 173  | 170  | 1.02 | 130  | 156  | 0.83 |               |
| <i>lplA</i>  | 778,866 | 780,374 | + | 126  | 111  | 1.13 | 88   | 104  | 0.85 |               |
| <i>lplB</i>  | 780,429 | 781,385 | + | 43   | 47   | 0.92 | 42   | 43   | 0.98 |               |
| <i>lplC</i>  | 781,399 | 782,286 | + | 85   | 83   | 1.02 | 83   | 85   | 0.99 |               |
| <i>lplD</i>  | 782,295 | 783,635 | + | 80   | 82   | 0.98 | 76   | 81   | 0.95 |               |
| <i>yefF</i>  | 783,718 | 784,413 | + | 82   | 87   | 0.94 | 70   | 86   | 0.82 |               |
| <i>yetG</i>  | 784,450 | 784,827 | - | 1946 | 2408 | 0.81 | 1132 | 1570 | 0.72 |               |
| <i>yetH</i>  | 784,880 | 785,242 | - | 602  | 591  | 1.02 | 434  | 431  | 1.01 |               |
| <i>yetI</i>  | 785,522 | 786,607 | + | 172  | 211  | 0.82 | 155  | 182  | 0.86 |               |
| <i>yezB</i>  | 786,613 | 786,897 | + | 156  | 191  | 0.82 | 150  | 181  | 0.83 |               |
| <i>yezD</i>  | 787,052 | 787,219 | + | 35   | 24   | 1.44 | 58   | 149  | 0.39 |               |
| <i>yetJ</i>  | 787,329 | 787,973 | + | 783  | 609  | 1.28 | 1156 | 1143 | 1.01 |               |
| <i>yetK</i>  | 787,973 | 788,965 | + | 539  | 492  | 1.10 | 844  | 924  | 0.91 |               |
| <i>yetL</i>  | 788,989 | 789,492 | - | 71   | 84   | 0.85 | 67   | 79   | 0.84 |               |
| <i>yetM</i>  | 789,655 | 790,764 | + | 108  | 107  | 1.00 | 82   | 100  | 0.82 |               |
| <i>yetN</i>  | 790,799 | 791,869 | - | 147  | 136  | 1.08 | 183  | 183  | 1.00 |               |
| <i>yetO</i>  | 792,019 | 795,204 | + | 478  | 246  | 1.95 | 151  | 116  | 1.30 |               |
| <i>yfiI</i>  | 795,651 | 797,570 | + | 802  | 706  | 1.14 | 1347 | 1418 | 0.95 |               |
| <i>yfiH</i>  | 797,806 | 798,570 | + | 76   | 76   | 1.01 | 63   | 67   | 0.94 |               |
| <i>yfiG</i>  | 798,640 | 799,545 | + | 85   | 93   | 0.91 | 72   | 86   | 0.84 |               |

|             |         |         |   |      |      |      |      |      |      |                        |
|-------------|---------|---------|---|------|------|------|------|------|------|------------------------|
| <i>yfnF</i> | 799,569 | 800,480 | + | 59   | 57   | 1.04 | 53   | 54   | 0.99 |                        |
| <i>yfnE</i> | 800,509 | 801,687 | + | 67   | 65   | 1.04 | 64   | 68   | 0.95 |                        |
| <i>yfnD</i> | 801,688 | 802,623 | + | 90   | 88   | 1.02 | 87   | 100  | 0.87 |                        |
| <i>yfnC</i> | 802,654 | 803,883 | - | 467  | 411  | 1.14 | 384  | 364  | 1.06 |                        |
| <i>yfnB</i> | 803,994 | 804,701 | - | 276  | 269  | 1.03 | 208  | 242  | 0.86 |                        |
| <i>yfnA</i> | 804,793 | 806,178 | - | 118  | 125  | 0.95 | 317  | 345  | 0.92 |                        |
| <i>yfmT</i> | 806,428 | 807,885 | + | 3184 | 3301 | 0.96 | 2003 | 2085 | 0.96 | SigD regulon           |
| <i>yfmS</i> | 807,899 | 808,759 | + | 3030 | 2993 | 1.01 | 1556 | 1739 | 0.89 |                        |
| <i>yfmR</i> | 808,894 | 810,783 | + | 620  | 553  | 1.12 | 655  | 612  | 1.07 |                        |
| <i>yfmQ</i> | 810,906 | 811,352 | + | 2160 | 1415 | 1.53 | 831  | 679  | 1.22 |                        |
| <i>yfmP</i> | 811,477 | 811,899 | + | 209  | 173  | 1.20 | 199  | 261  | 0.76 |                        |
| <i>yfmO</i> | 811,965 | 813,155 | + | 82   | 82   | 1.00 | 73   | 79   | 0.92 |                        |
| <i>yfmM</i> | 813,721 | 815,277 | - | 329  | 324  | 1.02 | 447  | 482  | 0.93 |                        |
| <i>yfmL</i> | 815,450 | 816,580 | + | 404  | 397  | 1.02 | 518  | 446  | 1.16 |                        |
| <i>yfmK</i> | 816,648 | 817,094 | + | 243  | 228  | 1.07 | 290  | 317  | 0.92 |                        |
| <i>yfmJ</i> | 817,147 | 818,166 | - | 289  | 360  | 0.80 | 406  | 480  | 0.85 |                        |
| <i>yfmI</i> | 818,648 | 819,868 | - | 114  | 139  | 0.82 | 155  | 192  | 0.81 | Spo0A and AbrB regulon |
| <i>yfmG</i> | 820,204 | 821,667 | + | 886  | 847  | 1.05 | 1565 | 1624 | 0.96 | AbrB regulon           |
| <i>yfmF</i> | 822,240 | 823,040 | - | 700  | 614  | 1.14 | 738  | 725  | 1.02 |                        |
| <i>yfmE</i> | 823,053 | 824,054 | - | 383  | 315  | 1.22 | 429  | 429  | 1.00 |                        |
| <i>yfmD</i> | 824,051 | 825,052 | - | 294  | 258  | 1.14 | 332  | 334  | 0.99 |                        |
| <i>yfmC</i> | 825,124 | 826,071 | - | 1348 | 1518 | 0.89 | 1225 | 1316 | 0.93 |                        |
| <i>yfmB</i> | 826,180 | 826,548 | - | 496  | 608  | 0.82 | 325  | 298  | 1.09 |                        |
| <i>yfmA</i> | 826,589 | 826,756 | + | 41   | 41   | 0.99 | 48   | 61   | 0.79 |                        |
| <i>yfIT</i> | 826,792 | 827,139 | + | 5253 | 6106 | 0.86 | 3758 | 2477 | 1.52 |                        |
| <i>pel</i>  | 827,330 | 828,592 | + | 2529 | 2963 | 0.85 | 2812 | 3084 | 0.91 |                        |
| <i>yfIS</i> | 828,719 | 830,155 | + | 369  | 333  | 1.11 | 186  | 159  | 1.17 |                        |
| <i>citS</i> | 830,282 | 831,910 | + | 389  | 335  | 1.16 | 444  | 481  | 0.92 |                        |
| <i>citT</i> | 831,882 | 832,562 | + | 362  | 291  | 1.24 | 408  | 479  | 0.85 |                        |
| <i>yfIP</i> | 832,745 | 833,524 | + | 286  | 239  | 1.20 | 325  | 382  | 0.85 |                        |
| <i>citM</i> | 833,720 | 835,021 | + | 381  | 406  | 0.94 | 538  | 491  | 1.10 |                        |
| <i>yfIN</i> | 835,077 | 835,871 | + | 204  | 237  | 0.86 | 214  | 284  | 0.75 |                        |
| <i>yfIM</i> | 836,071 | 837,081 | + | 373  | 326  | 1.14 | 522  | 488  | 1.07 |                        |
| <i>yfIL</i> | 837,072 | 837,347 | - | 165  | 154  | 1.07 | 147  | 173  | 0.85 |                        |
| <i>yfIK</i> | 837,414 | 838,079 | + | 411  | 314  | 1.31 | 477  | 403  | 1.18 |                        |
| <i>yfII</i> | 838,414 | 838,569 | - | 856  | 583  | 1.47 | 475  | 471  | 1.01 |                        |
| <i>yfIH</i> | 838,676 | 838,990 | - | 1041 | 907  | 1.15 | 790  | 600  | 1.32 |                        |
| <i>yfIG</i> | 839,072 | 839,821 | - | 1007 | 844  | 1.19 | 1099 | 1045 | 1.05 |                        |
| <i>naqP</i> | 839,993 | 841,351 | + | 808  | 763  | 1.06 | 567  | 566  | 1.00 |                        |
| <i>yfIE</i> | 841,384 | 843,333 | - | 576  | 760  | 0.76 | 866  | 1033 | 0.84 |                        |
| <i>yfIB</i> | 843,721 | 843,981 | + | 158  | 112  | 1.41 | 125  | 119  | 1.05 | AbrB regulon           |
| <i>yfIA</i> | 844,106 | 845,521 | + | 3816 | 3339 | 1.14 | 1528 | 853  | 1.79 | AbrB regulon           |
| <i>yfKT</i> | 845,518 | 846,594 | - | 25   | 31   | 0.81 | 30   | 31   | 0.98 |                        |
| <i>yfKS</i> | 846,618 | 846,818 | - | 19   | 27   | 0.70 | 24   | 23   | 1.03 |                        |
| <i>yfKR</i> | 846,834 | 847,988 | - | 57   | 66   | 0.86 | 49   | 54   | 0.90 |                        |
| <i>yfKQ</i> | 847,969 | 849,510 | - | 48   | 52   | 0.93 | 41   | 49   | 0.84 |                        |
| <i>treP</i> | 849,703 | 851,115 | + | 87   | 78   | 1.11 | 73   | 78   | 0.94 |                        |
| <i>treA</i> | 851,186 | 852,871 | + | 97   | 91   | 1.06 | 75   | 78   | 0.96 |                        |
| <i>treR</i> | 852,892 | 853,608 | + | 252  | 263  | 0.96 | 340  | 441  | 0.77 |                        |
| <i>yfKO</i> | 853,748 | 854,413 | + | 229  | 251  | 0.91 | 275  | 318  | 0.87 |                        |
| <i>yfKN</i> | 854,450 | 858,838 | - | 339  | 292  | 1.16 | 439  | 396  | 1.11 |                        |
| <i>yfKM</i> | 859,081 | 859,599 | + | 3925 | 3219 | 1.22 | 1995 | 1031 | 1.93 |                        |
| <i>yfKL</i> | 859,639 | 860,829 | - | 183  | 154  | 1.19 | 213  | 234  | 0.91 |                        |
| <i>yfKK</i> | 860,922 | 861,137 | - | 376  | 342  | 1.10 | 476  | 480  | 0.99 |                        |
| <i>yfKJ</i> | 861,340 | 861,810 | + | 3594 | 2256 | 1.59 | 2167 | 966  | 2.24 |                        |
| <i>yfKI</i> | 861,828 | 862,148 | + | 5017 | 3511 | 1.43 | 2664 | 1404 | 1.90 |                        |
| <i>yfKH</i> | 862,172 | 862,999 | + | 3855 | 2590 | 1.49 | 1718 | 826  | 2.08 |                        |
| <i>yfKF</i> | 863,198 | 864,373 | - | 100  | 111  | 0.90 | 116  | 154  | 0.75 |                        |
| <i>yfKE</i> | 864,541 | 865,596 | + | 1347 | 917  | 1.47 | 538  | 305  | 1.76 |                        |
| <i>yfKD</i> | 865,667 | 866,461 | + | 1149 | 756  | 1.52 | 514  | 301  | 1.71 |                        |
| <i>yfKC</i> | 866,500 | 867,342 | - | 127  | 111  | 1.14 | 202  | 188  | 1.07 |                        |
| <i>yfKB</i> | 867,343 | 867,804 | - | 191  | 179  | 1.07 | 348  | 354  | 0.98 |                        |
| <i>yfKA</i> | 867,999 | 868,463 | - | 168  | 161  | 1.04 | 241  | 256  | 0.94 |                        |
| <i>yfJT</i> | 868,608 | 868,793 | + | 121  | 144  | 0.84 | 267  | 375  | 0.71 |                        |
| <i>yfJS</i> | 868,894 | 869,685 | + | 68   | 77   | 0.87 | 81   | 104  | 0.78 |                        |
| <i>yfJR</i> | 869,723 | 870,508 | - | 302  | 307  | 0.98 | 427  | 442  | 0.97 |                        |
| <i>yfJO</i> | 870,682 | 871,641 | - | 222  | 184  | 1.21 | 352  | 358  | 0.98 |                        |
| <i>yfJP</i> | 871,760 | 872,623 | + | 226  | 258  | 0.87 | 196  | 252  | 0.78 |                        |
| <i>yfIO</i> | 872,737 | 874,137 | + | 345  | 369  | 0.94 | 429  | 558  | 0.77 |                        |
| <i>yfjN</i> | 875,761 | 876,738 | + | 171  | 157  | 1.09 | 342  | 325  | 1.05 |                        |
| <i>yfjM</i> | 876,934 | 877,386 | + | 180  | 188  | 0.96 | 239  | 245  | 0.97 |                        |
| <i>yfjL</i> | 877,416 | 878,105 | + | 235  | 228  | 1.03 | 372  | 381  | 0.98 |                        |
| <i>acoA</i> | 878,337 | 879,338 | + | 51   | 57   | 0.89 | 48   | 55   | 0.86 |                        |
| <i>acoB</i> | 879,342 | 880,370 | + | 76   | 79   | 0.96 | 63   | 76   | 0.83 |                        |
| <i>acoC</i> | 880,384 | 881,580 | + | 104  | 105  | 0.99 | 105  | 115  | 0.91 |                        |
| <i>acoL</i> | 881,601 | 882,977 | + | 128  | 135  | 0.95 | 110  | 129  | 0.85 |                        |
| <i>acoR</i> | 883,093 | 884,910 | + | 94   | 94   | 1.00 | 89   | 111  | 0.80 |                        |
| <i>sspH</i> | 884,964 | 885,143 | + | 67   | 88   | 0.75 | 129  | 150  | 0.86 |                        |
| <i>yfjF</i> | 885,179 | 885,508 | - | 211  | 159  | 1.33 | 140  | 167  | 0.84 |                        |
| <i>yfjE</i> | 885,558 | 886,016 | - | 297  | 197  | 1.51 | 166  | 181  | 0.92 |                        |
| <i>yfjD</i> | 886,110 | 886,667 | - | 248  | 182  | 1.37 | 187  | 186  | 1.00 |                        |
| <i>yfjC</i> | 886,699 | 887,466 | - | 128  | 118  | 1.08 | 104  | 126  | 0.83 |                        |
| <i>yfjB</i> | 887,478 | 888,701 | - | 145  | 174  | 0.84 | 107  | 125  | 0.86 |                        |
| <i>yfjA</i> | 888,707 | 889,021 | - | 97   | 134  | 0.73 | 66   | 78   | 0.85 |                        |
| <i>malA</i> | 889,357 | 890,706 | + | 159  | 171  | 0.92 | 137  | 162  | 0.84 |                        |
| <i>yfiA</i> | 890,771 | 891,535 | + | 165  | 153  | 1.08 | 151  | 141  | 1.07 |                        |
| <i>malP</i> | 891,550 | 893,133 | + | 154  | 157  | 0.98 | 109  | 129  | 0.84 |                        |
| <i>yfiB</i> | 893,239 | 894,960 | + | 172  | 155  | 1.11 | 202  | 213  | 0.95 |                        |
| <i>yfiC</i> | 894,954 | 896,768 | + | 251  | 229  | 1.09 | 357  | 350  | 1.02 |                        |
| <i>yfiD</i> | 896,923 | 897,327 | + | 60   | 68   | 0.89 | 56   | 81   | 0.69 |                        |
| <i>yfiE</i> | 897,345 | 898,202 | + | 68   | 77   | 0.88 | 67   | 86   | 0.78 |                        |

|              |         |         |   |      |      |      |      |      |      |
|--------------|---------|---------|---|------|------|------|------|------|------|
| <i>yfiF</i>  | 898,296 | 899,240 | + | 64   | 80   | 0.80 | 68   | 81   | 0.84 |
| <i>yfiG</i>  | 899,415 | 900,863 | + | 76   | 78   | 0.96 | 61   | 71   | 0.87 |
| <i>yfiH</i>  | 900,890 | 901,831 | + | 98   | 102  | 0.95 | 93   | 97   | 0.96 |
| <i>yfiI</i>  | 901,841 | 903,022 | + | 90   | 97   | 0.93 | 84   | 100  | 0.84 |
| <i>yfiJ</i>  | 903,146 | 904,348 | + | 216  | 209  | 1.04 | 234  | 268  | 0.87 |
| <i>yfiK</i>  | 904,345 | 905,007 | + | 202  | 191  | 1.06 | 229  | 243  | 0.94 |
| <i>yfiL</i>  | 905,151 | 906,086 | + | 98   | 90   | 1.09 | 63   | 75   | 0.84 |
| <i>yfiM</i>  | 906,099 | 907,289 | + | 63   | 60   | 1.06 | 54   | 57   | 0.95 |
| <i>yfiN</i>  | 907,303 | 908,460 | + | 120  | 131  | 0.91 | 86   | 99   | 0.86 |
| <i>padR</i>  | 908,533 | 909,081 | - | 322  | 288  | 1.12 | 260  | 307  | 0.85 |
| <i>lipB</i>  | 909,354 | 909,986 | + | 205  | 196  | 1.05 | 346  | 352  | 0.98 |
| <i>yfiQ</i>  | 910,175 | 911,263 | + | 61   | 67   | 0.91 | 59   | 64   | 0.92 |
| <i>yfiR</i>  | 911,299 | 911,916 | - | 188  | 163  | 1.15 | 247  | 262  | 0.94 |
| <i>yfiS</i>  | 911,882 | 913,135 | - | 80   | 89   | 0.89 | 71   | 98   | 0.73 |
| <i>yfiT</i>  | 913,259 | 913,795 | + | 585  | 555  | 1.05 | 670  | 650  | 1.03 |
| <i>yfiU</i>  | 913,792 | 915,348 | - | 74   | 74   | 1.01 | 82   | 92   | 0.88 |
| <i>yfiV</i>  | 915,459 | 915,941 | - | 144  | 156  | 0.92 | 163  | 194  | 0.84 |
| <i>yfiW</i>  | 916,113 | 916,889 | + | 574  | 433  | 1.33 | 748  | 667  | 1.12 |
| <i>yfiX</i>  | 916,864 | 918,684 | + | 426  | 305  | 1.40 | 773  | 634  | 1.22 |
| <i>yfiY</i>  | 918,702 | 919,679 | - | 851  | 944  | 0.90 | 1165 | 1593 | 0.73 |
| <i>yfiZ</i>  | 919,810 | 920,811 | + | 381  | 339  | 1.13 | 465  | 483  | 0.96 |
| <i>yfhA</i>  | 920,808 | 921,839 | + | 496  | 465  | 1.07 | 559  | 612  | 0.91 |
| <i>yfhB</i>  | 921,954 | 922,835 | + | 1792 | 1648 | 1.09 | 1875 | 1733 | 1.08 |
| <i>yfhC</i>  | 922,923 | 923,507 | + | 1746 | 2147 | 0.81 | 1926 | 2208 | 0.87 |
| <i>yfhD</i>  | 923,546 | 923,737 | - | 1099 | 751  | 1.46 | 512  | 297  | 1.72 |
| <i>yfhF</i>  | 923,969 | 924,880 | - | 1359 | 916  | 1.48 | 657  | 255  | 2.57 |
| <i>yfhG</i>  | 924,969 | 925,763 | + | 754  | 702  | 1.07 | 770  | 773  | 1.00 |
| <i>yfhH</i>  | 925,765 | 926,079 | + | 381  | 393  | 0.97 | 508  | 543  | 0.93 |
| <i>yfhI</i>  | 926,222 | 927,415 | + | 127  | 121  | 1.05 | 123  | 110  | 1.11 |
| <i>sspK</i>  | 927,448 | 927,600 | - | 29   | 33   | 0.87 | 26   | 24   | 1.08 |
| <i>yfhJ</i>  | 927,725 | 927,994 | + | 537  | 423  | 1.27 | 408  | 312  | 1.31 |
| <i>yfhK</i>  | 928,139 | 928,657 | + | 6617 | 6734 | 0.98 | 3733 | 2474 | 1.51 |
| <i>yfhL</i>  | 928,742 | 929,074 | + | 2896 | 2947 | 0.98 | 1316 | 972  | 1.35 |
| <i>yfhM</i>  | 929,061 | 929,921 | + | 3175 | 3173 | 1.00 | 1567 | 1256 | 1.25 |
| <i>csbB</i>  | 930,154 | 931,143 | + | 1201 | 1278 | 0.94 | 933  | 676  | 1.38 |
| <i>yfhO</i>  | 931,340 | 933,799 | + | 603  | 442  | 1.36 | 384  | 356  | 1.08 |
| <i>yfhP</i>  | 933,792 | 934,775 | - | 422  | 350  | 1.21 | 306  | 271  | 1.13 |
| <i>yfhQ</i>  | 934,991 | 936,100 | + | 354  | 282  | 1.26 | 668  | 554  | 1.21 |
| <i>yfhS</i>  | 936,108 | 936,332 | - | 25   | 30   | 0.86 | 24   | 29   | 0.81 |
| <i>fabL</i>  | 936,414 | 937,166 | + | 1440 | 1145 | 1.26 | 1990 | 1666 | 1.19 |
| <i>sspE</i>  | 937,235 | 937,489 | + | 756  | 622  | 1.21 | 1331 | 1113 | 1.20 |
| <i>ygaB</i>  | 937,578 | 937,922 | + | 70   | 83   | 0.84 | 108  | 134  | 0.81 |
| <i>ygaC</i>  | 938,066 | 938,596 | + | 696  | 553  | 1.26 | 763  | 752  | 1.02 |
| <i>ygaD</i>  | 938,657 | 940,426 | + | 348  | 255  | 1.36 | 455  | 406  | 1.12 |
| <i>ygaE</i>  | 940,503 | 941,564 | - | 385  | 339  | 1.14 | 211  | 166  | 1.27 |
| <i>gsaB</i>  | 941,784 | 943,073 | - | 669  | 602  | 1.11 | 891  | 916  | 0.97 |
| <i>ygaF</i>  | 943,226 | 943,699 | + | 288  | 246  | 1.17 | 472  | 555  | 0.85 |
| <i>perR</i>  | 943,822 | 944,259 | + | 1795 | 1696 | 1.06 | 1550 | 1697 | 0.91 |
| <i>ygzB</i>  | 944,294 | 944,647 | - | 850  | 811  | 1.05 | 575  | 578  | 0.99 |
| <i>ygaA</i>  | 944,855 | 945,739 | + | 880  | 960  | 0.92 | 784  | 851  | 0.92 |
| <i>spo0M</i> | 952,707 | 953,483 | - | 1520 | 1589 | 0.96 | 2517 | 2684 | 0.94 |
| <i>ygzA</i>  | 953,625 | 953,828 | + | 61   | 53   | 1.14 | 64   | 76   | 0.83 |
| <i>ygaJ</i>  | 954,225 | 954,980 | + | 476  | 436  | 1.09 | 532  | 465  | 1.14 |
| <i>thiC</i>  | 955,231 | 957,003 | + | 2522 | 3095 | 0.81 | 3039 | 3360 | 0.90 |
| <i>ygaK</i>  | 957,041 | 958,144 | - | 40   | 45   | 0.89 | 35   | 40   | 0.87 |
| <i>senS</i>  | 958,626 | 958,844 | + | 37   | 35   | 1.05 | 33   | 37   | 0.90 |
| <i>katA</i>  | 958,871 | 960,322 | - | 1032 | 797  | 1.30 | 969  | 886  | 1.09 |
| <i>ssuB</i>  | 960,686 | 961,498 | + | 49   | 55   | 0.88 | 41   | 53   | 0.76 |
| <i>ssuA</i>  | 961,516 | 962,514 | + | 55   | 58   | 0.95 | 49   | 59   | 0.82 |
| <i>ssuC</i>  | 962,511 | 963,341 | + | 70   | 73   | 0.96 | 53   | 64   | 0.83 |
| <i>ssuD</i>  | 963,364 | 964,494 | + | 77   | 78   | 0.98 | 61   | 75   | 0.81 |
| <i>ygaN</i>  | 964,598 | 965,134 | + | 153  | 150  | 1.02 | 140  | 153  | 0.92 |
| <i>yhzA</i>  | 965,246 | 965,515 | + | 69   | 68   | 1.02 | 66   | 68   | 0.97 |
| <i>ygaO</i>  | 965,533 | 966,006 | - | 312  | 294  | 1.06 | 320  | 268  | 1.20 |
| <i>yhzB</i>  | 966,566 | 967,189 | - | 168  | 182  | 0.92 | 182  | 181  | 1.00 |
| <i>yhbA</i>  | 967,125 | 968,432 | + | 87   | 82   | 1.07 | 87   | 90   | 0.97 |
| <i>yhbB</i>  | 968,499 | 969,434 | + | 53   | 76   | 0.70 | 51   | 57   | 0.90 |
| <i>cspR</i>  | 969,472 | 969,954 | + | 292  | 240  | 1.22 | 536  | 562  | 0.96 |
| <i>yhbD</i>  | 970,004 | 970,720 | + | 89   | 92   | 0.97 | 114  | 139  | 0.82 |
| <i>yhbE</i>  | 970,711 | 971,424 | + | 202  | 206  | 0.98 | 300  | 350  | 0.86 |
| <i>yhbF</i>  | 971,436 | 972,143 | + | 229  | 228  | 1.01 | 313  | 346  | 0.91 |
| <i>prkA</i>  | 972,493 | 974,388 | + | 123  | 127  | 0.97 | 113  | 123  | 0.93 |
| <i>yhbH</i>  | 974,568 | 975,746 | + | 79   | 76   | 1.04 | 87   | 84   | 1.05 |
| <i>yhbI</i>  | 975,906 | 976,370 | + | 201  | 128  | 1.57 | 184  | 141  | 1.30 |
| <i>yhbJ</i>  | 976,406 | 977,071 | + | 501  | 319  | 1.57 | 477  | 286  | 1.67 |
| <i>yhcA</i>  | 977,112 | 978,710 | + | 441  | 257  | 1.72 | 318  | 197  | 1.61 |
| <i>yhcB</i>  | 978,733 | 979,263 | + | 447  | 271  | 1.65 | 287  | 195  | 1.48 |
| <i>yhcC</i>  | 979,276 | 979,650 | + | 228  | 168  | 1.36 | 137  | 107  | 1.27 |
| <i>yhcE</i>  | 979,810 | 980,571 | + | 82   | 87   | 0.95 | 134  | 149  | 0.90 |
| <i>yhcF</i>  | 980,574 | 980,939 | + | 138  | 136  | 1.01 | 255  | 317  | 0.80 |
| <i>yhcG</i>  | 980,941 | 981,639 | + | 171  | 153  | 1.11 | 312  | 368  | 0.85 |
| <i>yhcH</i>  | 981,656 | 982,573 | + | 233  | 213  | 1.10 | 467  | 530  | 0.88 |
| <i>yhcI</i>  | 982,566 | 983,507 | + | 213  | 204  | 1.05 | 384  | 391  | 0.98 |
| <i>cspB</i>  | 983,599 | 983,802 | - | 6555 | 6481 | 1.01 | 4630 | 4690 | 0.99 |
| <i>yhcJ</i>  | 984,238 | 985,029 | + | 523  | 442  | 1.18 | 568  | 851  | 0.67 |
| <i>yhcK</i>  | 985,070 | 986,149 | - | 233  | 217  | 1.08 | 410  | 361  | 1.14 |
| <i>yhcL</i>  | 986,322 | 987,713 | + | 215  | 179  | 1.20 | 341  | 420  | 0.81 |
| <i>yhcM</i>  | 987,753 | 988,208 | - | 1896 | 1509 | 1.26 | 802  | 329  | 2.44 |
| <i>yhcN</i>  | 988,358 | 988,927 | + | 53   | 69   | 0.76 | 83   | 83   | 1.00 |
| <i>yhcO</i>  | 989,107 | 989,406 | + | 27   | 35   | 0.76 | 28   | 36   | 0.77 |
| <i>yhcP</i>  | 989,397 | 990,014 | + | 52   | 52   | 1.00 | 41   | 53   | 0.76 |

Spo0A regulon

|              |           |           |   |      |      |      |      |      |      |               |
|--------------|-----------|-----------|---|------|------|------|------|------|------|---------------|
| <i>yhcQ</i>  | 989,946   | 990,599   | - | 46   | 52   | 0.89 | 46   | 53   | 0.87 |               |
| <i>yhcR</i>  | 990,682   | 994,335   | + | 260  | 291  | 0.89 | 323  | 340  | 0.95 |               |
| <i>yhcS</i>  | 994,332   | 994,928   | + | 241  | 256  | 0.94 | 288  | 287  | 1.00 |               |
| <i>yhcT</i>  | 994,958   | 995,866   | - | 112  | 99   | 1.13 | 120  | 121  | 0.99 |               |
| <i>yhcU</i>  | 995,977   | 996,372   | + | 96   | 89   | 1.08 | 107  | 102  | 1.05 |               |
| <i>yhcV</i>  | 996,509   | 996,931   | + | 90   | 86   | 1.05 | 64   | 72   | 0.90 |               |
| <i>yhcW</i>  | 997,058   | 997,720   | + | 564  | 553  | 1.02 | 623  | 653  | 0.95 |               |
| <i>yhcX</i>  | 997,736   | 999,277   | + | 1068 | 973  | 1.10 | 1404 | 1318 | 1.07 |               |
| <i>yhcA</i>  | 999,697   | 1,001,049 | + | 428  | 517  | 0.83 | 396  | 543  | 0.73 |               |
| <i>glpP</i>  | 1,001,077 | 1,001,655 | + | 349  | 430  | 0.81 | 420  | 600  | 0.70 |               |
| <i>glpF</i>  | 1,001,834 | 1,002,658 | + | 124  | 151  | 0.82 | 184  | 240  | 0.77 | AbrB regulon  |
| <i>glpK</i>  | 1,002,677 | 1,004,167 | + | 1526 | 1300 | 1.17 | 949  | 706  | 1.34 | AbrB regulon  |
| <i>glpD</i>  | 1,004,308 | 1,005,975 | + | 766  | 709  | 1.08 | 313  | 380  | 0.82 | AbrB regulon  |
| <i>yhcB</i>  | 1,006,107 | 1,007,804 | + | 1895 | 1428 | 1.33 | 1907 | 1552 | 1.23 |               |
| <i>yhcY</i>  | 1,007,953 | 1,009,092 | + | 258  | 219  | 1.18 | 311  | 324  | 0.96 |               |
| <i>yhcZ</i>  | 1,009,089 | 1,009,733 | + | 346  | 285  | 1.21 | 453  | 452  | 1.00 |               |
| <i>yhdA</i>  | 1,009,730 | 1,010,254 | + | 251  | 211  | 1.19 | 359  | 333  | 1.08 |               |
| <i>yhdB</i>  | 1,010,269 | 1,010,511 | - | 27   | 32   | 0.85 | 29   | 37   | 0.78 |               |
| <i>yhdC</i>  | 1,010,712 | 1,011,035 | + | 51   | 46   | 1.11 | 62   | 59   | 1.06 |               |
| <i>lytF</i>  | 1,011,079 | 1,012,542 | - | 1626 | 2257 | 0.72 | 1464 | 2012 | 0.73 | SigD regulon  |
| <i>yhdE</i>  | 1,012,695 | 1,013,135 | - | 568  | 591  | 0.96 | 593  | 743  | 0.80 |               |
| <i>ygaB</i>  | 1,013,238 | 1,014,896 | - | 2036 | 1874 | 1.09 | 1168 | 687  | 1.70 |               |
| <i>spoVR</i> | 1,014,927 | 1,016,333 | + | 61   | 66   | 0.93 | 60   | 65   | 0.92 |               |
| <i>phoA</i>  | 1,016,363 | 1,017,748 | - | 133  | 111  | 1.20 | 131  | 127  | 1.03 |               |
| <i>lytE</i>  | 1,018,280 | 1,019,311 | + | 1099 | 866  | 1.27 | 1316 | 1644 | 0.80 | Spo0A regulon |
| <i>citR</i>  | 1,019,330 | 1,020,256 | - | 157  | 144  | 1.09 | 127  | 131  | 0.97 |               |
| <i>citA</i>  | 1,020,365 | 1,021,465 | + | 213  | 181  | 1.18 | 198  | 183  | 1.08 |               |
| <i>yhdF</i>  | 1,021,539 | 1,022,408 | + | 1812 | 1004 | 1.80 | 959  | 378  | 2.53 |               |
| <i>yhdG</i>  | 1,022,658 | 1,024,055 | + | 347  | 367  | 0.95 | 702  | 516  | 1.36 |               |
| <i>yhdH</i>  | 1,024,173 | 1,025,528 | + | 198  | 166  | 1.19 | 343  | 279  | 1.23 |               |
| <i>yhdI</i>  | 1,025,563 | 1,026,972 | - | 98   | 99   | 0.99 | 96   | 107  | 0.90 |               |
| <i>yhdJ</i>  | 1,027,082 | 1,027,510 | + | 254  | 264  | 0.96 | 225  | 225  | 1.00 |               |
| <i>yhdK</i>  | 1,027,541 | 1,027,831 | - | 63   | 69   | 0.91 | 129  | 130  | 0.99 |               |
| <i>yhdL</i>  | 1,027,819 | 1,028,895 | - | 579  | 552  | 1.05 | 627  | 660  | 0.95 |               |
| <i>sigM</i>  | 1,028,885 | 1,029,376 | - | 381  | 419  | 0.91 | 382  | 456  | 0.84 |               |
| <i>yhdN</i>  | 1,029,573 | 1,030,568 | + | 2381 | 2936 | 0.81 | 1418 | 1172 | 1.21 |               |
| <i>yhdO</i>  | 1,030,703 | 1,031,302 | + | 1251 | 1381 | 0.91 | 931  | 1139 | 0.82 |               |
| <i>yhdP</i>  | 1,031,371 | 1,032,705 | - | 741  | 689  | 1.07 | 1315 | 1312 | 1.00 |               |
| <i>yhdQ</i>  | 1,032,766 | 1,033,197 | - | 1049 | 975  | 1.08 | 1499 | 1503 | 1.00 |               |
| <i>yhdR</i>  | 1,033,354 | 1,034,535 | + | 404  | 391  | 1.03 | 801  | 922  | 0.87 |               |
| <i>yhdT</i>  | 1,034,862 | 1,036,247 | + | 1140 | 1441 | 0.79 | 1009 | 1297 | 0.78 |               |
| <i>yhdU</i>  | 1,036,261 | 1,036,617 | - | 107  | 82   | 1.30 | 154  | 149  | 1.04 |               |
| <i>yhdV</i>  | 1,036,614 | 1,037,009 | - | 296  | 243  | 1.22 | 310  | 316  | 0.98 |               |
| <i>yhdW</i>  | 1,036,996 | 1,037,727 | - | 440  | 370  | 1.19 | 559  | 541  | 1.03 |               |
| <i>yhdY</i>  | 1,038,217 | 1,039,332 | + | 170  | 134  | 1.27 | 166  | 141  | 1.18 |               |
| <i>yhdZ</i>  | 1,039,402 | 1,040,145 | + | 260  | 259  | 1.01 | 290  | 327  | 0.89 |               |
| <i>yheN</i>  | 1,040,169 | 1,041,017 | - | 800  | 724  | 1.10 | 971  | 1113 | 0.87 |               |
| <i>dat</i>   | 1,041,302 | 1,042,150 | + | 2411 | 2409 | 1.00 | 2524 | 2640 | 0.96 |               |
| <i>nhaC</i>  | 1,042,193 | 1,043,554 | - | 183  | 191  | 0.96 | 196  | 208  | 0.95 |               |
| <i>nhaX</i>  | 1,043,681 | 1,044,181 | - | 4101 | 5316 | 0.77 | 2120 | 1252 | 1.69 |               |
| <i>yheI</i>  | 1,044,626 | 1,046,383 | + | 612  | 878  | 0.70 | 371  | 438  | 0.85 |               |
| <i>yheH</i>  | 1,046,380 | 1,048,401 | + | 576  | 710  | 0.81 | 404  | 467  | 0.87 |               |
| <i>yheG</i>  | 1,048,450 | 1,049,070 | - | 275  | 364  | 0.76 | 431  | 541  | 0.80 |               |
| <i>sspB</i>  | 1,049,339 | 1,049,542 | - | 62   | 84   | 0.74 | 90   | 113  | 0.79 |               |
| <i>yheE</i>  | 1,049,751 | 1,049,969 | - | 86   | 98   | 0.88 | 81   | 82   | 0.98 |               |
| <i>yheD</i>  | 1,050,119 | 1,051,480 | - | 73   | 68   | 1.07 | 81   | 79   | 1.03 |               |
| <i>yheC</i>  | 1,051,470 | 1,052,561 | - | 46   | 53   | 0.86 | 48   | 51   | 0.95 |               |
| <i>yheB</i>  | 1,052,828 | 1,053,961 | + | 273  | 259  | 1.06 | 366  | 414  | 0.88 |               |
| <i>yheA</i>  | 1,054,054 | 1,054,407 | + | 784  | 776  | 1.01 | 723  | 654  | 1.11 |               |
| <i>yhaZ</i>  | 1,054,451 | 1,055,524 | - | 230  | 163  | 1.41 | 269  | 218  | 1.23 |               |
| <i>yhaY</i>  | 1,055,717 | 1,055,968 | - | 24   | 27   | 0.90 | 25   | 27   | 0.92 |               |
| <i>yhaX</i>  | 1,056,011 | 1,056,877 | + | 47   | 50   | 0.95 | 48   | 60   | 0.79 |               |
| <i>hemZ</i>  | 1,056,989 | 1,058,494 | + | 135  | 137  | 0.99 | 214  | 242  | 0.89 |               |
| <i>yhaU</i>  | 1,058,512 | 1,059,738 | - | 203  | 148  | 1.37 | 238  | 199  | 1.20 |               |
| <i>yhaT</i>  | 1,059,735 | 1,060,232 | - | 158  | 108  | 1.46 | 196  | 155  | 1.27 |               |
| <i>yhaS</i>  | 1,060,296 | 1,060,634 | - | 349  | 217  | 1.61 | 462  | 329  | 1.40 |               |
| <i>yhaR</i>  | 1,060,799 | 1,061,566 | + | 147  | 193  | 0.76 | 124  | 169  | 0.73 |               |
| <i>yhaQ</i>  | 1,061,899 | 1,062,795 | + | 548  | 444  | 1.23 | 1128 | 999  | 1.13 | AbrB regulon  |
| <i>yhaP</i>  | 1,062,788 | 1,064,047 | + | 386  | 328  | 1.18 | 966  | 841  | 1.15 | AbrB regulon  |
| <i>yhaO</i>  | 1,064,154 | 1,065,380 | + | 327  | 253  | 1.29 | 411  | 374  | 1.10 |               |
| <i>yhaN</i>  | 1,065,385 | 1,068,276 | + | 613  | 365  | 1.68 | 533  | 417  | 1.28 |               |
| <i>yhaM</i>  | 1,068,350 | 1,069,294 | + | 1363 | 1037 | 1.31 | 1248 | 1172 | 1.06 |               |
| <i>yhaL</i>  | 1,069,419 | 1,069,631 | + | 56   | 55   | 1.01 | 89   | 126  | 0.71 |               |
| <i>prsA</i>  | 1,069,672 | 1,070,550 | - | 2446 | 2105 | 1.16 | 3477 | 3263 | 1.07 |               |
| <i>yhaK</i>  | 1,071,350 | 1,071,604 | - | 65   | 88   | 0.74 | 61   | 65   | 0.93 |               |
| <i>yhaJ</i>  | 1,071,628 | 1,071,867 | - | 60   | 91   | 0.65 | 71   | 84   | 0.84 |               |
| <i>yhaI</i>  | 1,072,075 | 1,072,416 | + | 157  | 155  | 1.01 | 223  | 220  | 1.02 |               |
| <i>hpr</i>   | 1,072,413 | 1,073,024 | - | 1489 | 1382 | 1.08 | 1318 | 1431 | 0.92 |               |
| <i>yhaH</i>  | 1,073,202 | 1,073,558 | - | 1117 | 1147 | 0.97 | 1035 | 1213 | 0.85 |               |
| <i>yhaG</i>  | 1,073,951 | 1,074,469 | - | 936  | 883  | 1.06 | 1226 | 1178 | 1.04 |               |
| <i>serC</i>  | 1,074,594 | 1,075,673 | - | 2164 | 1961 | 1.10 | 1938 | 1964 | 0.99 |               |
| <i>hit</i>   | 1,075,820 | 1,076,257 | - | 913  | 985  | 0.93 | 1553 | 1608 | 0.97 |               |
| <i>ecsA</i>  | 1,076,745 | 1,077,488 | + | 367  | 317  | 1.16 | 420  | 452  | 0.93 |               |
| <i>ecsB</i>  | 1,077,481 | 1,078,707 | + | 475  | 341  | 1.40 | 643  | 651  | 0.99 |               |
| <i>ecsC</i>  | 1,078,727 | 1,079,437 | + | 406  | 309  | 1.32 | 563  | 571  | 0.99 |               |
| <i>yhaA</i>  | 1,079,455 | 1,080,645 | - | 1106 | 1136 | 0.97 | 1246 | 1292 | 0.96 |               |
| <i>yhfA</i>  | 1,080,718 | 1,082,109 | - | 74   | 73   | 1.02 | 66   | 74   | 0.89 |               |
| <i>yhgB</i>  | 1,082,175 | 1,082,489 | - | 124  | 120  | 1.03 | 101  | 118  | 0.86 |               |
| <i>yhgC</i>  | 1,082,534 | 1,083,034 | - | 1527 | 1750 | 0.87 | 1948 | 1862 | 1.05 |               |
| <i>pbpF</i>  | 1,083,156 | 1,085,300 | + | 265  | 216  | 1.23 | 336  | 288  | 1.17 |               |
| <i>hemE</i>  | 1,085,422 | 1,086,483 | + | 1473 | 972  | 1.52 | 956  | 727  | 1.31 |               |

|              |           |           |   |      |      |      |      |      |      |               |
|--------------|-----------|-----------|---|------|------|------|------|------|------|---------------|
| <i>hemH</i>  | 1,086,555 | 1,087,487 | + | 2701 | 1910 | 1.41 | 1758 | 1353 | 1.30 |               |
| <i>hemY</i>  | 1,087,502 | 1,088,914 | + | 1454 | 1019 | 1.43 | 856  | 686  | 1.25 |               |
| <i>yhgD</i>  | 1,089,060 | 1,089,635 | + | 424  | 396  | 1.07 | 658  | 465  | 1.41 |               |
| <i>yhgE</i>  | 1,089,706 | 1,092,033 | + | 437  | 394  | 1.11 | 781  | 572  | 1.36 |               |
| <i>fabHB</i> | 1,092,075 | 1,093,052 | - | 2025 | 2019 | 1.00 | 1230 | 995  | 1.24 |               |
| <i>yhjC</i>  | 1,093,178 | 1,093,954 | + | 321  | 337  | 0.96 | 319  | 272  | 1.17 |               |
| <i>yhjD</i>  | 1,094,045 | 1,094,248 | - | 26   | 35   | 0.74 | 34   | 31   | 1.10 |               |
| <i>yhjE</i>  | 1,094,367 | 1,095,407 | + | 862  | 826  | 1.04 | 1057 | 931  | 1.14 |               |
| <i>yhjF</i>  | 1,095,420 | 1,095,827 | + | 690  | 736  | 0.94 | 954  | 833  | 1.15 |               |
| <i>gliT</i>  | 1,095,864 | 1,097,153 | - | 1442 | 1735 | 0.83 | 1361 | 1890 | 0.72 |               |
| <i>yhjI</i>  | 1,097,716 | 1,098,450 | + | 648  | 526  | 1.23 | 707  | 659  | 1.07 |               |
| <i>yhjJ</i>  | 1,098,463 | 1,099,458 | + | 1243 | 971  | 1.28 | 1414 | 1271 | 1.11 |               |
| <i>yhjK</i>  | 1,099,523 | 1,100,167 | + | 922  | 799  | 1.15 | 881  | 783  | 1.13 |               |
| <i>yhjL</i>  | 1,100,284 | 1,101,825 | + | 178  | 130  | 1.37 | 185  | 146  | 1.26 |               |
| <i>yhjM</i>  | 1,101,864 | 1,102,259 | + | 162  | 129  | 1.26 | 127  | 95   | 1.34 |               |
| <i>yhjN</i>  | 1,102,408 | 1,103,688 | - | 205  | 170  | 1.21 | 208  | 185  | 1.12 |               |
| <i>aprE</i>  | 1,103,727 | 1,104,872 | - | 264  | 342  | 0.77 | 206  | 279  | 0.74 |               |
| <i>yhjO</i>  | 1,105,307 | 1,105,756 | + | 129  | 123  | 1.05 | 167  | 188  | 0.89 |               |
| <i>yhjP</i>  | 1,105,828 | 1,106,820 | + | 509  | 439  | 1.16 | 656  | 569  | 1.15 |               |
| <i>yhjQ</i>  | 1,106,962 | 1,108,008 | + | 851  | 1176 | 0.72 | 730  | 1019 | 0.72 |               |
| <i>yhjR</i>  | 1,108,040 | 1,108,621 | - | 660  | 738  | 0.89 | 1397 | 1679 | 0.83 |               |
| <i>yhjS</i>  | 1,108,692 | 1,109,786 | - | 515  | 601  | 0.86 | 976  | 1213 | 0.81 |               |
| <i>yhjT</i>  | 1,109,783 | 1,111,222 | - | 498  | 565  | 0.88 | 894  | 1140 | 0.78 |               |
| <i>yhjU</i>  | 1,111,229 | 1,111,789 | - | 252  | 353  | 0.72 | 464  | 673  | 0.69 |               |
| <i>hemAT</i> | 1,111,924 | 1,113,222 | - | 1801 | 1841 | 0.98 | 1597 | 1835 | 0.87 | SigD regulon  |
| <i>yhjW</i>  | 1,113,361 | 1,114,890 | - | 72   | 77   | 0.93 | 61   | 82   | 0.74 |               |
| <i>yhxC</i>  | 1,115,002 | 1,115,859 | + | 92   | 92   | 1.01 | 62   | 77   | 0.81 |               |
| <i>yhzC</i>  | 1,115,887 | 1,116,120 | - | 2466 | 3197 | 0.77 | 1279 | 1367 | 0.94 |               |
| <i>comK</i>  | 1,116,413 | 1,116,991 | + | 670  | 733  | 0.91 | 978  | 1204 | 0.81 | Spo0A regulon |
| <i>yhxD</i>  | 1,117,038 | 1,117,937 | - | 3031 | 1635 | 1.85 | 1855 | 727  | 2.55 |               |
| <i>yhjA</i>  | 1,118,154 | 1,118,423 | + | 2440 | 2521 | 0.97 | 2907 | 2548 | 1.14 |               |
| <i>yhjB</i>  | 1,118,466 | 1,119,935 | - | 1000 | 890  | 1.12 | 1005 | 767  | 1.31 |               |
| <i>yhjC</i>  | 1,119,932 | 1,120,132 | - | 1731 | 1539 | 1.12 | 1856 | 1431 | 1.30 |               |
| <i>yhjD</i>  | 1,120,340 | 1,120,702 | - | 50   | 44   | 1.13 | 57   | 40   | 1.42 |               |
| <i>yhjE</i>  | 1,120,855 | 1,121,478 | + | 468  | 334  | 1.40 | 460  | 377  | 1.22 |               |
| <i>sipV</i>  | 1,121,480 | 1,121,986 | + | 416  | 305  | 1.36 | 455  | 388  | 1.17 |               |
| <i>yhjG</i>  | 1,122,166 | 1,123,665 | + | 203  | 225  | 0.90 | 179  | 231  | 0.78 |               |
| <i>yhjH</i>  | 1,123,742 | 1,124,269 | + | 167  | 163  | 1.03 | 177  | 196  | 0.91 |               |
| <i>glcP</i>  | 1,124,427 | 1,125,632 | - | 46   | 45   | 1.01 | 52   | 56   | 0.93 |               |
| <i>yhjI</i>  | 1,125,704 | 1,126,756 | - | 90   | 82   | 1.10 | 100  | 100  | 1.00 |               |
| <i>yhjK</i>  | 1,126,759 | 1,127,619 | - | 71   | 69   | 1.03 | 83   | 91   | 0.91 |               |
| <i>yhjL</i>  | 1,127,591 | 1,128,916 | - | 46   | 50   | 0.91 | 48   | 57   | 0.84 |               |
| <i>yhjM</i>  | 1,129,020 | 1,130,009 | + | 360  | 324  | 1.11 | 456  | 562  | 0.81 | AbrB regulon  |
| <i>yhjN</i>  | 1,130,223 | 1,131,377 | - | 133  | 136  | 0.98 | 162  | 170  | 0.95 |               |
| <i>yhjO</i>  | 1,131,484 | 1,132,689 | - | 76   | 75   | 1.02 | 49   | 57   | 0.85 |               |
| <i>yhjP</i>  | 1,132,803 | 1,134,530 | + | 144  | 119  | 1.21 | 158  | 149  | 1.06 |               |
| <i>yhjQ</i>  | 1,134,560 | 1,134,886 | - | 77   | 79   | 0.97 | 55   | 47   | 1.18 |               |
| <i>yhjR</i>  | 1,135,004 | 1,135,441 | - | 41   | 41   | 1.00 | 35   | 39   | 0.89 |               |
| <i>addB</i>  | 1,135,625 | 1,139,125 | + | 548  | 437  | 1.25 | 654  | 603  | 1.08 |               |
| <i>addA</i>  | 1,139,112 | 1,142,810 | + | 726  | 652  | 1.11 | 1094 | 955  | 1.15 |               |
| <i>sbcD</i>  | 1,142,882 | 1,144,057 | + | 508  | 486  | 1.04 | 770  | 659  | 1.17 |               |
| <i>yirY</i>  | 1,144,054 | 1,147,446 | + | 718  | 692  | 1.04 | 1213 | 1028 | 1.18 |               |
| <i>yisB</i>  | 1,147,460 | 1,147,762 | + | 521  | 527  | 0.99 | 1007 | 840  | 1.20 |               |
| <i>gerPF</i> | 1,147,799 | 1,148,026 | - | 35   | 33   | 1.07 | 45   | 39   | 1.15 |               |
| <i>gerPE</i> | 1,148,049 | 1,148,450 | - | 47   | 57   | 0.82 | 43   | 49   | 0.88 |               |
| <i>gerPD</i> | 1,148,450 | 1,148,626 | - | 55   | 55   | 1.00 | 57   | 61   | 0.94 |               |
| <i>gerPC</i> | 1,148,623 | 1,149,240 | - | 105  | 113  | 0.93 | 87   | 98   | 0.89 |               |
| <i>gerPB</i> | 1,149,263 | 1,149,505 | - | 37   | 40   | 0.93 | 32   | 35   | 0.89 |               |
| <i>gerPA</i> | 1,149,511 | 1,149,732 | - | 45   | 49   | 0.91 | 44   | 54   | 0.81 |               |
| <i>yisI</i>  | 1,150,155 | 1,150,325 | - | 52   | 46   | 1.15 | 64   | 77   | 0.83 |               |
| <i>yisJ</i>  | 1,150,471 | 1,151,394 | - | 62   | 62   | 1.00 | 39   | 49   | 0.80 |               |
| <i>yisK</i>  | 1,151,549 | 1,152,454 | + | 652  | 862  | 0.76 | 752  | 984  | 0.76 |               |
| <i>yisL</i>  | 1,152,570 | 1,152,926 | + | 345  | 434  | 0.80 | 446  | 554  | 0.81 |               |
| <i>wprA</i>  | 1,153,094 | 1,155,778 | + | 4000 | 4478 | 0.89 | 4757 | 4908 | 0.97 |               |
| <i>yisN</i>  | 1,155,809 | 1,156,396 | - | 43   | 41   | 1.05 | 38   | 42   | 0.91 |               |
| <i>asnO</i>  | 1,156,542 | 1,158,386 | + | 75   | 77   | 0.97 | 61   | 76   | 0.80 |               |
| <i>yizA</i>  | 1,158,516 | 1,158,995 | - | 82   | 95   | 0.86 | 67   | 78   | 0.86 |               |
| <i>yisP</i>  | 1,159,227 | 1,160,051 | + | 635  | 431  | 1.47 | 350  | 234  | 1.49 |               |
| <i>yisQ</i>  | 1,160,081 | 1,161,448 | - | 52   | 59   | 0.88 | 45   | 52   | 0.87 |               |
| <i>yisR</i>  | 1,161,572 | 1,162,435 | + | 425  | 264  | 1.61 | 245  | 231  | 1.06 |               |
| <i>degA</i>  | 1,162,453 | 1,163,466 | + | 837  | 539  | 1.55 | 531  | 488  | 1.09 |               |
| <i>yisS</i>  | 1,163,675 | 1,164,703 | + | 89   | 86   | 1.04 | 99   | 108  | 0.92 |               |
| <i>yisT</i>  | 1,164,754 | 1,165,263 | - | 726  | 803  | 0.90 | 517  | 474  | 1.09 |               |
| <i>yisU</i>  | 1,165,313 | 1,165,975 | - | 64   | 64   | 0.99 | 53   | 63   | 0.84 |               |
| <i>yisV</i>  | 1,166,042 | 1,167,496 | + | 159  | 153  | 1.04 | 151  | 168  | 0.90 |               |
| <i>yisX</i>  | 1,167,504 | 1,168,142 | - | 248  | 272  | 0.91 | 283  | 294  | 0.96 |               |
| <i>yisY</i>  | 1,168,348 | 1,169,154 | + | 133  | 131  | 1.01 | 169  | 167  | 1.02 |               |
| <i>yisZ</i>  | 1,169,182 | 1,169,781 | - | 53   | 56   | 0.94 | 47   | 54   | 0.87 |               |
| <i>yitA</i>  | 1,169,778 | 1,170,947 | - | 91   | 96   | 0.95 | 82   | 101  | 0.82 |               |
| <i>yitB</i>  | 1,171,060 | 1,171,770 | - | 150  | 151  | 0.99 | 105  | 120  | 0.87 |               |
| <i>yitC</i>  | 1,171,955 | 1,172,641 | + | 81   | 87   | 0.94 | 71   | 75   | 0.95 |               |
| <i>yitD</i>  | 1,172,638 | 1,173,396 | + | 67   | 65   | 1.03 | 53   | 63   | 0.84 |               |
| <i>yitE</i>  | 1,173,441 | 1,174,070 | - | 39   | 42   | 0.93 | 33   | 39   | 0.83 |               |
| <i>yitF</i>  | 1,174,166 | 1,175,281 | - | 72   | 77   | 0.93 | 53   | 63   | 0.84 |               |
| <i>yitG</i>  | 1,175,290 | 1,176,558 | - | 76   | 81   | 0.94 | 68   | 81   | 0.84 |               |
| <i>yitH</i>  | 1,176,670 | 1,177,518 | - | 310  | 325  | 0.95 | 351  | 419  | 0.84 |               |
| <i>yitI</i>  | 1,177,523 | 1,177,987 | - | 300  | 308  | 0.97 | 336  | 462  | 0.73 |               |
| <i>yitJ</i>  | 1,178,062 | 1,179,900 | - | 458  | 509  | 0.90 | 814  | 1015 | 0.80 |               |
| <i>yitK</i>  | 1,180,214 | 1,180,705 | - | 671  | 663  | 1.01 | 617  | 702  | 0.88 |               |
| <i>yitL</i>  | 1,180,804 | 1,181,700 | + | 436  | 394  | 1.10 | 446  | 472  | 0.94 |               |
| <i>yitM</i>  | 1,181,753 | 1,182,337 | - | 456  | 478  | 0.95 | 308  | 373  | 0.83 |               |



|              |           |           |   |      |      |      |      |      |      |                        |
|--------------|-----------|-----------|---|------|------|------|------|------|------|------------------------|
| <i>yitN</i>  | 1,182,334 | 1,182,702 | - | 65   | 70   | 0.92 | 60   | 67   | 0.89 |                        |
| <i>yitO</i>  | 1,182,834 | 1,183,046 | - | 32   | 35   | 0.92 | 44   | 42   | 1.06 |                        |
| <i>yitP</i>  | 1,183,247 | 1,183,783 | - | 50   | 57   | 0.88 | 57   | 66   | 0.87 |                        |
| <i>yitQ</i>  | 1,184,155 | 1,184,892 | + | 219  | 186  | 1.18 | 201  | 237  | 0.85 |                        |
| <i>yitR</i>  | 1,184,912 | 1,185,205 | + | 147  | 117  | 1.26 | 133  | 145  | 0.92 |                        |
| <i>nprB</i>  | 1,185,341 | 1,186,957 | + | 105  | 107  | 0.98 | 104  | 117  | 0.89 |                        |
| <i>yitS</i>  | 1,187,004 | 1,187,855 | - | 605  | 499  | 1.21 | 540  | 494  | 1.09 |                        |
| <i>yitT</i>  | 1,187,993 | 1,188,835 | + | 2593 | 1646 | 1.58 | 1282 | 531  | 2.41 |                        |
| <i>ipi</i>   | 1,188,950 | 1,189,309 | + | 1172 | 737  | 1.59 | 319  | 173  | 1.85 |                        |
| <i>yitU</i>  | 1,189,794 | 1,190,606 | - | 479  | 429  | 1.12 | 551  | 641  | 0.86 |                        |
| <i>yitV</i>  | 1,190,727 | 1,191,494 | + | 462  | 375  | 1.23 | 498  | 533  | 0.93 |                        |
| <i>yitW</i>  | 1,191,558 | 1,191,866 | + | 2067 | 1861 | 1.11 | 2145 | 1992 | 1.08 |                        |
| <i>yitY</i>  | 1,192,162 | 1,193,592 | + | 162  | 159  | 1.02 | 320  | 387  | 0.83 |                        |
| <i>yitZ</i>  | 1,193,637 | 1,194,131 | + | 80   | 80   | 0.99 | 166  | 191  | 0.87 |                        |
| <i>argC</i>  | 1,194,338 | 1,195,378 | + | 194  | 187  | 1.04 | 831  | 1379 | 0.60 |                        |
| <i>argI</i>  | 1,195,398 | 1,196,618 | + | 337  | 435  | 0.78 | 1472 | 2007 | 0.73 |                        |
| <i>argB</i>  | 1,196,633 | 1,197,409 | + | 330  | 446  | 0.74 | 1181 | 1601 | 0.74 |                        |
| <i>argD</i>  | 1,197,406 | 1,198,563 | + | 406  | 511  | 0.79 | 1064 | 1417 | 0.75 |                        |
| <i>carA</i>  | 1,198,634 | 1,199,695 | + | 628  | 779  | 0.81 | 1348 | 1742 | 0.77 |                        |
| <i>carB</i>  | 1,199,688 | 1,202,780 | + | 993  | 1194 | 0.83 | 1461 | 1833 | 0.80 |                        |
| <i>argF</i>  | 1,202,768 | 1,203,727 | + | 1246 | 1543 | 0.81 | 1510 | 1842 | 0.82 |                        |
| <i>yjzC</i>  | 1,203,813 | 1,203,992 | + | 40   | 59   | 0.68 | 40   | 47   | 0.84 |                        |
| <i>yjzD</i>  | 1,204,038 | 1,204,223 | - | 568  | 679  | 0.84 | 634  | 684  | 0.93 |                        |
| <i>yjaU</i>  | 1,204,472 | 1,205,206 | + | 86   | 80   | 1.08 | 92   | 104  | 0.88 |                        |
| <i>yjaV</i>  | 1,205,288 | 1,205,695 | + | 47   | 48   | 0.99 | 47   | 53   | 0.89 |                        |
| <i>med</i>   | 1,205,937 | 1,206,890 | + | 873  | 828  | 1.05 | 616  | 570  | 1.08 | Spo0A regulon          |
| <i>comZ</i>  | 1,206,905 | 1,207,096 | + | 174  | 250  | 0.70 | 295  | 229  | 1.29 |                        |
| <i>yjzB</i>  | 1,207,126 | 1,207,365 | - | 89   | 104  | 0.86 | 98   | 93   | 1.05 |                        |
| <i>fabHA</i> | 1,207,530 | 1,208,468 | + | 2298 | 2413 | 0.95 | 1836 | 2241 | 0.82 |                        |
| <i>fabF</i>  | 1,208,491 | 1,209,732 | + | 3099 | 3127 | 0.99 | 3052 | 3168 | 0.96 |                        |
| <i>yjaZ</i>  | 1,209,808 | 1,210,593 | + | 77   | 86   | 0.89 | 66   | 70   | 0.95 |                        |
| <i>appD</i>  | 1,210,785 | 1,211,771 | + | 913  | 1199 | 0.76 | 787  | 981  | 0.80 |                        |
| <i>appF</i>  | 1,211,768 | 1,212,757 | + | 1358 | 1488 | 0.91 | 1157 | 1483 | 0.78 |                        |
| <i>appA</i>  | 1,212,845 | 1,214,476 | + | 3890 | 4672 | 0.83 | 3033 | 3577 | 0.85 |                        |
| <i>appB</i>  | 1,214,552 | 1,215,505 | + | 1871 | 2427 | 0.77 | 1473 | 1961 | 0.75 |                        |
| <i>appC</i>  | 1,215,522 | 1,216,433 | + | 1658 | 2188 | 0.76 | 1280 | 1706 | 0.75 |                        |
| <i>yjbA</i>  | 1,216,639 | 1,217,391 | + | 127  | 147  | 0.86 | 159  | 254  | 0.63 |                        |
| <i>trpS</i>  | 1,217,426 | 1,218,418 | - | 892  | 889  | 1.00 | 1004 | 1050 | 0.96 |                        |
| <i>oppA</i>  | 1,219,162 | 1,220,799 | + | 2803 | 3150 | 0.89 | 1876 | 2102 | 0.89 |                        |
| <i>oppB</i>  | 1,220,907 | 1,221,842 | + | 650  | 564  | 1.15 | 399  | 454  | 0.88 |                        |
| <i>oppC</i>  | 1,221,846 | 1,222,763 | + | 859  | 759  | 1.13 | 603  | 643  | 0.94 |                        |
| <i>oppD</i>  | 1,222,768 | 1,223,844 | + | 1185 | 1138 | 1.04 | 895  | 986  | 0.91 |                        |
| <i>oppF</i>  | 1,223,846 | 1,224,763 | + | 1105 | 1129 | 0.98 | 930  | 977  | 0.95 |                        |
| <i>yjbB</i>  | 1,224,870 | 1,226,087 | + | 83   | 78   | 1.06 | 119  | 108  | 1.10 |                        |
| <i>yjbC</i>  | 1,226,251 | 1,226,829 | + | 1907 | 2025 | 0.94 | 1798 | 1425 | 1.26 |                        |
| <i>yjbD</i>  | 1,227,010 | 1,227,405 | + | 1956 | 2062 | 0.95 | 1263 | 1250 | 1.01 |                        |
| <i>yjbE</i>  | 1,227,448 | 1,228,104 | - | 49   | 54   | 0.91 | 47   | 53   | 0.89 |                        |
| <i>mecA</i>  | 1,228,381 | 1,229,037 | + | 1258 | 1414 | 0.89 | 916  | 780  | 1.17 |                        |
| <i>yjbF</i>  | 1,229,228 | 1,230,349 | + | 157  | 136  | 1.15 | 186  | 171  | 1.09 |                        |
| <i>yjbG</i>  | 1,230,579 | 1,232,408 | + | 1822 | 1847 | 0.99 | 1940 | 1761 | 1.10 |                        |
| <i>yjbH</i>  | 1,232,926 | 1,233,753 | + | 369  | 341  | 1.08 | 396  | 425  | 0.93 |                        |
| <i>yjbI</i>  | 1,233,822 | 1,234,220 | - | 500  | 426  | 1.17 | 347  | 439  | 0.79 |                        |
| <i>yjbJ</i>  | 1,234,475 | 1,235,020 | - | 1142 | 1787 | 0.64 | 1024 | 1300 | 0.79 | SigD regulon           |
| <i>yjbK</i>  | 1,235,224 | 1,235,796 | - | 330  | 301  | 1.10 | 264  | 248  | 1.06 |                        |
| <i>yjbL</i>  | 1,235,921 | 1,236,289 | + | 550  | 514  | 1.07 | 748  | 869  | 0.86 |                        |
| <i>yjbM</i>  | 1,236,318 | 1,236,953 | + | 774  | 736  | 1.05 | 933  | 977  | 0.96 |                        |
| <i>yjbN</i>  | 1,236,972 | 1,237,772 | + | 771  | 727  | 1.06 | 850  | 925  | 0.92 |                        |
| <i>yjbO</i>  | 1,237,835 | 1,238,686 | + | 704  | 672  | 1.05 | 770  | 822  | 0.94 |                        |
| <i>yjbP</i>  | 1,238,699 | 1,239,433 | - | 94   | 96   | 0.98 | 126  | 127  | 0.99 |                        |
| <i>yjbQ</i>  | 1,239,668 | 1,241,512 | + | 94   | 103  | 0.91 | 198  | 220  | 0.90 |                        |
| <i>tenA</i>  | 1,241,761 | 1,242,471 | + | 1244 | 1497 | 0.83 | 1884 | 2355 | 0.80 |                        |
| <i>tenI</i>  | 1,242,446 | 1,243,063 | + | 1933 | 2392 | 0.81 | 3172 | 3485 | 0.91 |                        |
| <i>goxB</i>  | 1,243,047 | 1,244,156 | + | 2033 | 2397 | 0.85 | 2823 | 3171 | 0.89 |                        |
| <i>thiS</i>  | 1,244,156 | 1,244,356 | + | 2195 | 2715 | 0.81 | 3417 | 3707 | 0.92 |                        |
| <i>thiG</i>  | 1,244,353 | 1,245,123 | + | 2250 | 2823 | 0.80 | 2929 | 3182 | 0.92 |                        |
| <i>thiF</i>  | 1,245,120 | 1,246,130 | + | 2310 | 2818 | 0.82 | 2915 | 3182 | 0.92 |                        |
| <i>yjbV</i>  | 1,246,149 | 1,246,964 | + | 2295 | 2860 | 0.80 | 3034 | 3252 | 0.93 |                        |
| <i>fabI</i>  | 1,247,100 | 1,247,876 | + | 2987 | 3692 | 0.81 | 1850 | 2550 | 0.73 |                        |
| <i>yjbX</i>  | 1,247,977 | 1,248,660 | + | 159  | 180  | 0.89 | 122  | 159  | 0.77 |                        |
| <i>cotZ</i>  | 1,248,754 | 1,249,200 | - | 48   | 62   | 0.76 | 45   | 56   | 0.80 |                        |
| <i>cotY</i>  | 1,249,328 | 1,249,816 | - | 33   | 57   | 0.58 | 31   | 38   | 0.82 |                        |
| <i>cotX</i>  | 1,249,968 | 1,250,486 | - | 42   | 83   | 0.51 | 40   | 45   | 0.88 |                        |
| <i>cotW</i>  | 1,250,585 | 1,250,902 | - | 74   | 103  | 0.71 | 57   | 77   | 0.75 |                        |
| <i>cotV</i>  | 1,250,943 | 1,251,329 | - | 39   | 62   | 0.63 | 33   | 38   | 0.87 |                        |
| <i>yjcA</i>  | 1,251,489 | 1,251,845 | + | 71   | 66   | 1.07 | 68   | 74   | 0.91 |                        |
| <i>yjcB</i>  | 1,252,170 | 1,252,385 | + | 40   | 46   | 0.87 | 47   | 41   | 1.15 |                        |
| <i>yjcC</i>  | 1,252,649 | 1,252,951 | + | 29   | 34   | 0.85 | 24   | 31   | 0.77 |                        |
| <i>yjcD</i>  | 1,253,025 | 1,253,304 | - | 132  | 111  | 1.18 | 198  | 189  | 1.05 |                        |
| <i>yjcE</i>  | 1,253,385 | 1,253,687 | - | 20   | 28   | 0.71 | 29   | 49   | 0.60 |                        |
| <i>yjcF</i>  | 1,253,748 | 1,256,170 | - | 1664 | 2210 | 0.75 | 2231 | 2865 | 0.78 |                        |
| <i>yjcG</i>  | 1,256,174 | 1,256,689 | - | 2005 | 2615 | 0.77 | 2121 | 3109 | 0.68 |                        |
| <i>yjcH</i>  | 1,256,726 | 1,257,448 | - | 1648 | 2106 | 0.78 | 1504 | 2365 | 0.64 |                        |
| <i>yjcI</i>  | 1,257,804 | 1,258,925 | + | 575  | 775  | 0.74 | 1041 | 1663 | 0.63 |                        |
| <i>yjcJ</i>  | 1,258,918 | 1,260,090 | + | 588  | 840  | 0.70 | 874  | 1268 | 0.69 |                        |
| <i>yjcK</i>  | 1,260,123 | 1,260,668 | - | 172  | 235  | 0.73 | 167  | 212  | 0.79 |                        |
| <i>yjcL</i>  | 1,260,738 | 1,261,928 | - | 206  | 280  | 0.74 | 179  | 228  | 0.79 |                        |
| <i>yjcM</i>  | 1,263,014 | 1,264,243 | - | 1082 | 1054 | 1.03 | 1521 | 1923 | 0.79 | AbrB regulon           |
| <i>yjcN</i>  | 1,264,369 | 1,264,689 | + | 1254 | 1495 | 0.84 | 1132 | 1456 | 0.78 |                        |
| <i>yjcO</i>  | 1,265,199 | 1,265,660 | + | 280  | 337  | 0.83 | 365  | 402  | 0.91 |                        |
| <i>yjcP</i>  | 1,265,926 | 1,266,429 | + | 935  | 940  | 0.99 | 1116 | 1129 | 0.99 | Spo0A and SigD regulon |
| <i>yjcQ</i>  | 1,266,441 | 1,266,725 | + | 352  | 347  | 1.01 | 523  | 534  | 0.98 |                        |

|                |           |           |   |      |      |      |      |      |      |               |
|----------------|-----------|-----------|---|------|------|------|------|------|------|---------------|
| <i>yjcR</i>    | 1,266,886 | 1,267,413 | + | 35   | 37   | 0.93 | 35   | 37   | 0.96 |               |
| <i>yjcS</i>    | 1,267,587 | 1,267,904 | + | 678  | 631  | 1.07 | 680  | 734  | 0.93 |               |
| <i>yjdA</i>    | 1,268,141 | 1,268,896 | + | 695  | 661  | 1.05 | 650  | 584  | 1.11 |               |
| <i>yjdB</i>    | 1,269,045 | 1,269,392 | - | 244  | 180  | 1.36 | 173  | 147  | 1.17 | AbrB regulon  |
| <i>manR</i>    | 1,269,943 | 1,271,889 | + | 59   | 55   | 1.08 | 60   | 67   | 0.89 |               |
| <i>manP</i>    | 1,272,037 | 1,273,806 | + | 66   | 71   | 0.93 | 57   | 72   | 0.79 |               |
| <i>manA</i>    | 1,274,005 | 1,274,952 | + | 42   | 54   | 0.78 | 44   | 49   | 0.89 |               |
| <i>yjdF</i>    | 1,275,122 | 1,275,604 | + | 316  | 280  | 1.13 | 529  | 469  | 1.13 |               |
| <i>yjdG</i>    | 1,275,650 | 1,276,156 | - | 376  | 369  | 1.02 | 339  | 403  | 0.84 | AbrB regulon  |
| <i>yjdH</i>    | 1,276,388 | 1,276,792 | - | 67   | 71   | 0.95 | 59   | 79   | 0.74 |               |
| <i>yjdI</i>    | 1,276,997 | 1,277,476 | + | 421  | 398  | 1.06 | 409  | 385  | 1.06 |               |
| <i>yjdJ</i>    | 1,277,876 | 1,278,205 | - | 145  | 131  | 1.11 | 154  | 165  | 0.93 |               |
| <i>ctaO</i>    | 1,278,825 | 1,279,814 | - | 345  | 264  | 1.31 | 226  | 326  | 0.69 | AbrB regulon  |
| <i>cotT</i>    | 1,279,937 | 1,280,260 | - | 62   | 113  | 0.55 | 42   | 56   | 0.75 |               |
| <i>yjeA</i>    | 1,280,439 | 1,281,842 | + | 268  | 460  | 0.58 | 135  | 174  | 0.78 |               |
| <i>yjfA</i>    | 1,281,882 | 1,282,355 | - | 745  | 688  | 1.08 | 480  | 405  | 1.19 |               |
| <i>yjfB</i>    | 1,282,480 | 1,282,647 | - | 4138 | 3845 | 1.08 | 3276 | 2517 | 1.30 | SigD regulon  |
| <i>yjfC</i>    | 1,282,774 | 1,283,703 | + | 53   | 58   | 0.92 | 46   | 57   | 0.81 |               |
| <i>yjgA</i>    | 1,283,681 | 1,284,079 | - | 132  | 111  | 1.19 | 96   | 95   | 1.00 |               |
| <i>yjgB</i>    | 1,284,180 | 1,284,755 | - | 398  | 302  | 1.32 | 236  | 108  | 2.19 |               |
| <i>yjgC</i>    | 1,284,901 | 1,287,858 | + | 3421 | 2017 | 1.70 | 1781 | 680  | 2.62 |               |
| <i>yjgD</i>    | 1,287,851 | 1,288,411 | + | 3913 | 2194 | 1.78 | 2281 | 874  | 2.61 |               |
| <i>yjhA</i>    | 1,288,608 | 1,289,249 | + | 280  | 237  | 1.18 | 494  | 466  | 1.06 |               |
| <i>yjhB</i>    | 1,289,442 | 1,289,954 | + | 150  | 134  | 1.12 | 170  | 165  | 1.03 |               |
| <i>yjiA</i>    | 1,289,985 | 1,290,263 | - | 53   | 62   | 0.86 | 73   | 93   | 0.79 |               |
| <i>yjiB</i>    | 1,290,654 | 1,291,844 | + | 259  | 243  | 1.07 | 347  | 332  | 1.05 |               |
| <i>yjiC</i>    | 1,291,867 | 1,293,045 | + | 240  | 216  | 1.11 | 421  | 362  | 1.16 |               |
| <i>yjiA</i>    | 1,293,448 | 1,294,260 | + | 443  | 388  | 1.14 | 597  | 615  | 0.97 |               |
| <i>yjkA</i>    | 1,294,306 | 1,295,058 | - | 109  | 100  | 1.08 | 150  | 141  | 1.07 |               |
| <i>yjkB</i>    | 1,295,058 | 1,295,810 | - | 100  | 99   | 1.01 | 127  | 142  | 0.90 |               |
| <i>yjIA</i>    | 1,295,930 | 1,296,904 | - | 226  | 172  | 1.32 | 221  | 214  | 1.03 |               |
| <i>yjIB</i>    | 1,297,036 | 1,297,533 | + | 1269 | 720  | 1.76 | 685  | 277  | 2.47 |               |
| <i>yjIC</i>    | 1,297,922 | 1,298,344 | + | 3338 | 3488 | 0.96 | 2686 | 3036 | 0.88 |               |
| <i>yjID</i>    | 1,298,384 | 1,299,562 | + | 3306 | 3462 | 0.96 | 3096 | 3459 | 0.90 |               |
| <i>uxaC</i>    | 1,299,760 | 1,301,181 | + | 62   | 67   | 0.92 | 45   | 57   | 0.79 |               |
| <i>yjmB</i>    | 1,301,249 | 1,302,628 | + | 69   | 73   | 0.94 | 61   | 61   | 1.00 |               |
| <i>yjmC</i>    | 1,302,733 | 1,303,746 | + | 79   | 82   | 0.97 | 61   | 93   | 0.66 |               |
| <i>yjmD</i>    | 1,303,752 | 1,304,771 | + | 123  | 126  | 0.97 | 93   | 113  | 0.82 |               |
| <i>uxuA</i>    | 1,304,796 | 1,305,875 | + | 78   | 80   | 0.98 | 62   | 75   | 0.83 |               |
| <i>yjmF</i>    | 1,305,872 | 1,306,708 | + | 109  | 116  | 0.95 | 99   | 116  | 0.85 |               |
| <i>exuT</i>    | 1,306,756 | 1,308,024 | + | 65   | 67   | 0.97 | 53   | 64   | 0.83 |               |
| <i>exuR</i>    | 1,308,112 | 1,309,113 | + | 256  | 268  | 0.95 | 255  | 325  | 0.79 |               |
| <i>uxaB</i>    | 1,309,190 | 1,310,632 | + | 71   | 78   | 0.91 | 54   | 62   | 0.87 |               |
| <i>uxaA</i>    | 1,310,629 | 1,312,122 | + | 57   | 60   | 0.94 | 50   | 56   | 0.90 |               |
| <i>yjnA</i>    | 1,312,161 | 1,312,925 | - | 241  | 151  | 1.59 | 289  | 407  | 0.71 |               |
| <i>yjoA</i>    | 1,313,150 | 1,313,614 | - | 3024 | 2590 | 1.17 | 2351 | 1872 | 1.26 |               |
| <i>yjoB</i>    | 1,313,763 | 1,315,034 | + | 264  | 221  | 1.20 | 486  | 542  | 0.90 |               |
| <i>rapA</i>    | 1,315,179 | 1,316,315 | + | 4045 | 5313 | 0.76 | 2750 | 3115 | 0.88 | Spo0A regulon |
| <i>yjpA</i>    | 1,316,470 | 1,316,712 | - | 150  | 134  | 1.12 | 297  | 249  | 1.19 |               |
| <i>xlyB</i>    | 1,316,849 | 1,317,802 | + | 972  | 417  | 2.33 | 1609 | 774  | 2.08 |               |
| <i>yjqA</i>    | 1,317,839 | 1,318,216 | - | 316  | 290  | 1.09 | 614  | 525  | 1.17 |               |
| <i>yjqB</i>    | 1,318,322 | 1,318,924 | + | 224  | 161  | 1.40 | 306  | 217  | 1.41 |               |
| <i>yjqC</i>    | 1,319,001 | 1,319,837 | + | 197  | 140  | 1.40 | 302  | 226  | 1.34 |               |
| <i>xkdA</i>    | 1,319,881 | 1,320,477 | - | 240  | 130  | 1.84 | 198  | 121  | 1.64 |               |
| <i>xre</i>     | 1,320,640 | 1,320,981 | - | 366  | 351  | 1.04 | 508  | 586  | 0.87 |               |
| <i>xkdB</i>    | 1,321,325 | 1,322,158 | + | 293  | 144  | 2.03 | 379  | 189  | 2.01 |               |
| <i>xkdC</i>    | 1,322,058 | 1,322,858 | + | 394  | 185  | 2.13 | 594  | 300  | 1.98 |               |
| <i>xkdD</i>    | 1,323,110 | 1,323,460 | + | 282  | 112  | 2.52 | 414  | 201  | 2.05 |               |
| <i>xtrA</i>    | 1,323,457 | 1,323,663 | + | 445  | 252  | 1.76 | 787  | 451  | 1.75 |               |
| <i>xpf</i>     | 1,323,779 | 1,324,288 | + | 349  | 141  | 2.48 | 646  | 293  | 2.20 |               |
| <i>xtmA</i>    | 1,324,404 | 1,325,201 | + | 1270 | 392  | 3.24 | 1842 | 936  | 1.97 |               |
| <i>xtmB</i>    | 1,325,198 | 1,326,499 | + | 1057 | 316  | 3.34 | 1451 | 757  | 1.92 |               |
| <i>xkdE</i>    | 1,326,503 | 1,327,990 | + | 1029 | 373  | 2.76 | 1567 | 847  | 1.85 |               |
| <i>xkdF</i>    | 1,328,010 | 1,328,837 | + | 2826 | 1221 | 2.31 | 3944 | 2177 | 1.81 |               |
| <i>xkdG</i>    | 1,328,863 | 1,329,798 | + | 2494 | 1054 | 2.37 | 3731 | 1937 | 1.93 |               |
| <i>xkdH</i>    | 1,330,202 | 1,330,558 | + | 1861 | 725  | 2.57 | 2659 | 1223 | 2.17 |               |
| <i>xkdI</i>    | 1,330,555 | 1,331,040 | + | 2446 | 964  | 2.54 | 3291 | 1606 | 2.05 |               |
| <i>xkdJ</i>    | 1,331,053 | 1,331,493 | + | 2196 | 965  | 2.28 | 3451 | 1728 | 2.00 |               |
| <i>xkdK</i>    | 1,331,712 | 1,333,106 | + | 2666 | 1062 | 2.51 | 3820 | 2018 | 1.89 |               |
| <i>xkdM</i>    | 1,333,113 | 1,333,556 | + | 1978 | 753  | 2.63 | 2966 | 1608 | 1.84 |               |
| <i>xkdN</i>    | 1,333,648 | 1,334,274 | + | 1309 | 430  | 3.05 | 2331 | 1320 | 1.77 |               |
| <i>xkdO</i>    | 1,334,279 | 1,338,277 | + | 1020 | 352  | 2.90 | 1791 | 896  | 2.00 |               |
| <i>xkdP</i>    | 1,338,222 | 1,338,929 | + | 1141 | 364  | 3.13 | 2147 | 1060 | 2.02 |               |
| <i>xkdQ</i>    | 1,338,945 | 1,339,922 | + | 1269 | 424  | 2.99 | 2106 | 980  | 2.15 |               |
| <i>xkdR</i>    | 1,339,922 | 1,340,188 | + | 1096 | 340  | 3.23 | 1740 | 763  | 2.28 |               |
| <i>xkdS</i>    | 1,340,245 | 1,340,670 | + | 1430 | 521  | 2.75 | 2583 | 1194 | 2.16 |               |
| <i>xkdT</i>    | 1,340,663 | 1,341,709 | + | 1143 | 415  | 2.76 | 2084 | 984  | 2.12 |               |
| <i>xkdU</i>    | 1,341,693 | 1,342,271 | + | 916  | 323  | 2.84 | 1521 | 710  | 2.14 |               |
| <i>xkdV</i>    | 1,342,542 | 1,344,605 | + | 1279 | 438  | 2.92 | 2252 | 1119 | 2.01 |               |
| <i>xkdW</i>    | 1,344,617 | 1,344,946 | + | 1150 | 366  | 3.14 | 1955 | 918  | 2.13 |               |
| <i>xkdX</i>    | 1,344,943 | 1,345,107 | + | 523  | 155  | 3.37 | 807  | 315  | 2.56 |               |
| <i>xepA</i>    | 1,345,151 | 1,345,990 | + | 1288 | 481  | 2.68 | 2211 | 993  | 2.23 |               |
| <i>xhIA</i>    | 1,346,043 | 1,346,312 | + | 2350 | 947  | 2.48 | 4220 | 2033 | 2.08 |               |
| <i>xhIB</i>    | 1,346,325 | 1,346,588 | + | 2317 | 814  | 2.85 | 3374 | 1847 | 1.83 |               |
| <i>xlyA</i>    | 1,346,601 | 1,347,494 | + | 1745 | 636  | 2.74 | 3046 | 1445 | 2.11 |               |
| <i>spoIISB</i> | 1,347,754 | 1,347,924 | - | 370  | 312  | 1.19 | 417  | 397  | 1.05 |               |
| <i>spoIISA</i> | 1,347,924 | 1,348,670 | - | 518  | 378  | 1.37 | 466  | 477  | 0.98 |               |
| <i>pit</i>     | 1,348,794 | 1,349,780 | - | 1097 | 891  | 1.23 | 1196 | 1194 | 1.00 |               |
| <i>ykaA</i>    | 1,349,793 | 1,350,410 | - | 1207 | 1129 | 1.07 | 1174 | 1188 | 0.99 | Spo0A regulon |
| <i>ykbA</i>    | 1,350,686 | 1,352,002 | - | 150  | 135  | 1.11 | 104  | 131  | 0.79 |               |
| <i>ykeA</i>    | 1,352,391 | 1,353,341 | + | 183  | 231  | 0.79 | 276  | 382  | 0.72 |               |

|              |           |           |   |      |      |      |      |      |      |
|--------------|-----------|-----------|---|------|------|------|------|------|------|
| <i>ykcB</i>  | 1,353,592 | 1,355,742 | + | 97   | 99   | 0.98 | 80   | 91   | 0.87 |
| <i>ykcC</i>  | 1,355,754 | 1,356,725 | + | 49   | 53   | 0.93 | 51   | 57   | 0.90 |
| <i>htrA</i>  | 1,357,243 | 1,358,592 | - | 646  | 709  | 0.91 | 2184 | 2919 | 0.75 |
| <i>proG</i>  | 1,358,761 | 1,359,579 | - | 317  | 282  | 1.12 | 449  | 402  | 1.12 |
| <i>dppA</i>  | 1,359,708 | 1,360,532 | + | 1231 | 1484 | 0.83 | 1010 | 1452 | 0.70 |
| <i>dppB</i>  | 1,360,549 | 1,361,475 | + | 879  | 962  | 0.91 | 444  | 708  | 0.63 |
| <i>dppC</i>  | 1,361,481 | 1,362,443 | + | 829  | 922  | 0.90 | 429  | 724  | 0.59 |
| <i>dppD</i>  | 1,362,448 | 1,363,455 | + | 1045 | 1231 | 0.85 | 594  | 948  | 0.63 |
| <i>dppE</i>  | 1,363,458 | 1,365,107 | + | 1101 | 1361 | 0.81 | 739  | 1166 | 0.63 |
| <i>ykfA</i>  | 1,365,448 | 1,366,152 | + | 450  | 543  | 0.83 | 339  | 526  | 0.65 |
| <i>ykfB</i>  | 1,366,149 | 1,367,249 | + | 435  | 547  | 0.80 | 401  | 555  | 0.72 |
| <i>ykfC</i>  | 1,367,246 | 1,368,136 | + | 403  | 510  | 0.79 | 432  | 624  | 0.69 |
| <i>ykfD</i>  | 1,368,149 | 1,369,132 | + | 393  | 523  | 0.75 | 416  | 595  | 0.70 |
| <i>ykgB</i>  | 1,369,180 | 1,370,229 | - | 3305 | 3016 | 1.10 | 2350 | 2038 | 1.15 |
| <i>ykgA</i>  | 1,370,389 | 1,371,180 | - | 2890 | 2457 | 1.18 | 1008 | 356  | 2.83 |
| <i>ykhA</i>  | 1,371,340 | 1,371,858 | + | 477  | 387  | 1.23 | 549  | 497  | 1.10 |
| <i>hmp</i>   | 1,372,097 | 1,373,296 | + | 978  | 200  | 4.89 | 116  | 68   | 1.70 |
| <i>yzkH</i>  | 1,373,373 | 1,373,597 | - | 33   | 36   | 0.92 | 28   | 29   | 0.95 |
| <i>ykjA</i>  | 1,373,742 | 1,374,473 | + | 100  | 71   | 1.41 | 44   | 51   | 0.87 |
| <i>ykkA</i>  | 1,374,565 | 1,375,092 | + | 233  | 205  | 1.14 | 269  | 217  | 1.24 |
| <i>ykkB</i>  | 1,375,082 | 1,375,600 | + | 202  | 183  | 1.10 | 243  | 198  | 1.23 |
| <i>ykkC</i>  | 1,375,823 | 1,376,161 | + | 198  | 174  | 1.14 | 173  | 178  | 0.97 |
| <i>ykkD</i>  | 1,376,161 | 1,376,478 | + | 116  | 108  | 1.07 | 129  | 117  | 1.10 |
| <i>ykkE</i>  | 1,376,549 | 1,377,451 | + | 424  | 433  | 0.98 | 504  | 521  | 0.97 |
| <i>proB</i>  | 1,377,802 | 1,378,899 | + | 457  | 480  | 0.95 | 803  | 921  | 0.87 |
| <i>proA</i>  | 1,378,911 | 1,380,158 | + | 812  | 876  | 0.93 | 1131 | 1284 | 0.88 |
| <i>ykIA</i>  | 1,380,284 | 1,380,709 | + | 179  | 367  | 0.49 | 283  | 546  | 0.52 |
| <i>ykmA</i>  | 1,380,740 | 1,381,183 | - | 255  | 231  | 1.10 | 260  | 232  | 1.12 |
| <i>yzkA</i>  | 1,381,326 | 1,381,736 | + | 6778 | 6620 | 1.02 | 4007 | 2451 | 1.63 |
| <i>guaD</i>  | 1,381,983 | 1,382,453 | - | 87   | 107  | 0.81 | 144  | 179  | 0.80 |
| <i>metE</i>  | 1,382,626 | 1,384,914 | - | 2119 | 2394 | 0.89 | 3556 | 3838 | 0.93 |
| <i>ispA</i>  | 1,385,330 | 1,386,289 | - | 172  | 238  | 0.72 | 131  | 148  | 0.89 |
| <i>ykoB</i>  | 1,386,512 | 1,387,345 | + | 757  | 794  | 0.95 | 1211 | 1217 | 1.00 |
| <i>ykoC</i>  | 1,387,376 | 1,388,140 | - | 1336 | 1268 | 1.05 | 1632 | 1425 | 1.14 |
| <i>ykoD</i>  | 1,388,287 | 1,389,759 | - | 1046 | 981  | 1.07 | 1284 | 1151 | 1.12 |
| <i>ykoE</i>  | 1,389,746 | 1,390,345 | - | 1280 | 1264 | 1.01 | 1585 | 1398 | 1.13 |
| <i>ykoF</i>  | 1,390,347 | 1,390,949 | - | 1311 | 1330 | 0.99 | 1636 | 1436 | 1.14 |
| <i>ykoG</i>  | 1,391,260 | 1,391,946 | + | 168  | 157  | 1.07 | 184  | 203  | 0.90 |
| <i>ykoH</i>  | 1,391,950 | 1,393,314 | + | 144  | 123  | 1.17 | 216  | 225  | 0.96 |
| <i>ykoI</i>  | 1,393,311 | 1,393,991 | + | 125  | 102  | 1.22 | 225  | 222  | 1.01 |
| <i>ykoJ</i>  | 1,394,083 | 1,394,595 | + | 790  | 1399 | 0.56 | 1814 | 2849 | 0.64 |
| <i>yzkD</i>  | 1,394,678 | 1,394,815 | + | 18   | 29   | 0.62 | 45   | 49   | 0.91 |
| <i>ykoK</i>  | 1,395,321 | 1,396,676 | + | 599  | 587  | 1.02 | 696  | 689  | 1.01 |
| <i>tnrA</i>  | 1,396,719 | 1,397,051 | - | 213  | 264  | 0.81 | 169  | 194  | 0.87 |
| <i>yzkB</i>  | 1,397,246 | 1,397,401 | + | 55   | 52   | 1.05 | 69   | 55   | 1.27 |
| <i>ykoL</i>  | 1,397,489 | 1,397,671 | + | 22   | 25   | 0.89 | 23   | 27   | 0.85 |
| <i>ykoM</i>  | 1,397,804 | 1,398,268 | + | 470  | 538  | 0.87 | 638  | 831  | 0.77 |
| <i>ykoN</i>  | 1,398,283 | 1,399,404 | - | 59   | 61   | 0.97 | 52   | 56   | 0.93 |
| <i>ykoP</i>  | 1,399,496 | 1,400,047 | + | 33   | 37   | 0.88 | 34   | 36   | 0.94 |
| <i>ykoQ</i>  | 1,400,075 | 1,400,887 | - | 54   | 55   | 0.97 | 48   | 56   | 0.85 |
| <i>ykoS</i>  | 1,401,080 | 1,402,774 | + | 67   | 63   | 1.06 | 56   | 62   | 0.90 |
| <i>ykoT</i>  | 1,402,787 | 1,403,800 | + | 61   | 54   | 1.13 | 54   | 50   | 1.08 |
| <i>ykoU</i>  | 1,403,826 | 1,405,661 | - | 100  | 86   | 1.16 | 89   | 107  | 0.83 |
| <i>ykoV</i>  | 1,405,665 | 1,406,600 | - | 121  | 99   | 1.22 | 87   | 100  | 0.87 |
| <i>ykoW</i>  | 1,406,637 | 1,408,886 | - | 329  | 358  | 0.92 | 255  | 350  | 0.73 |
| <i>ykoX</i>  | 1,409,220 | 1,409,885 | + | 143  | 142  | 1.01 | 231  | 267  | 0.86 |
| <i>ykoY</i>  | 1,409,962 | 1,410,936 | + | 143  | 158  | 0.91 | 159  | 201  | 0.79 |
| <i>sigI</i>  | 1,411,200 | 1,411,955 | + | 287  | 210  | 1.37 | 304  | 270  | 1.13 |
| <i>ykrI</i>  | 1,411,952 | 1,413,097 | + | 242  | 177  | 1.37 | 485  | 459  | 1.06 |
| <i>sspD</i>  | 1,413,108 | 1,413,302 | - | 87   | 117  | 0.74 | 87   | 94   | 0.93 |
| <i>ykrK</i>  | 1,413,433 | 1,414,134 | - | 184  | 230  | 0.80 | 232  | 319  | 0.73 |
| <i>ykrL</i>  | 1,414,305 | 1,415,201 | + | 585  | 500  | 1.17 | 683  | 634  | 1.08 |
| <i>ykrM</i>  | 1,415,375 | 1,416,724 | + | 81   | 82   | 0.98 | 122  | 114  | 1.07 |
| <i>ykrP</i>  | 1,417,246 | 1,418,268 | - | 180  | 109  | 1.65 | 187  | 113  | 1.66 |
| <i>kinE</i>  | 1,418,521 | 1,420,737 | + | 314  | 297  | 1.06 | 432  | 377  | 1.14 |
| <i>ogt</i>   | 1,420,734 | 1,421,231 | + | 487  | 443  | 1.10 | 588  | 479  | 1.23 |
| <i>ykrS</i>  | 1,421,480 | 1,422,541 | - | 4249 | 5045 | 0.84 | 5110 | 5417 | 0.94 |
| <i>ykrT</i>  | 1,422,549 | 1,423,748 | - | 4047 | 4710 | 0.86 | 4493 | 5023 | 0.89 |
| <i>ykrU</i>  | 1,424,075 | 1,424,854 | - | 477  | 540  | 0.88 | 718  | 849  | 0.85 |
| <i>ykrV</i>  | 1,424,949 | 1,426,145 | + | 842  | 1005 | 0.84 | 1177 | 1304 | 0.90 |
| <i>ykrW</i>  | 1,426,342 | 1,427,586 | + | 528  | 636  | 0.83 | 756  | 1081 | 0.70 |
| <i>ykrX</i>  | 1,427,583 | 1,428,290 | + | 1100 | 1215 | 0.91 | 1714 | 2231 | 0.77 |
| <i>ykrY</i>  | 1,428,248 | 1,428,877 | + | 1622 | 1794 | 0.90 | 2224 | 2853 | 0.78 |
| <i>ykrZ</i>  | 1,428,892 | 1,429,428 | + | 1302 | 1600 | 0.81 | 1876 | 2320 | 0.81 |
| <i>ykvA</i>  | 1,429,469 | 1,429,789 | - | 523  | 541  | 0.97 | 420  | 434  | 0.97 |
| <i>spoOE</i> | 1,429,992 | 1,430,249 | + | 1618 | 1898 | 0.85 | 1240 | 1093 | 1.13 |
| <i>eag</i>   | 1,430,335 | 1,430,766 | + | 186  | 196  | 0.95 | 142  | 128  | 1.11 |
| <i>kinD</i>  | 1,430,794 | 1,432,314 | - | 672  | 524  | 1.28 | 622  | 591  | 1.05 |
| <i>ykvE</i>  | 1,432,507 | 1,432,944 | + | 344  | 229  | 1.50 | 377  | 284  | 1.33 |
| <i>motB</i>  | 1,432,984 | 1,433,769 | - | 2660 | 3026 | 0.88 | 1536 | 1793 | 0.86 |
| <i>motA</i>  | 1,433,741 | 1,434,553 | - | 2757 | 3447 | 0.80 | 1657 | 1826 | 0.91 |
| <i>clpE</i>  | 1,434,936 | 1,437,035 | - | 181  | 165  | 1.10 | 132  | 127  | 1.03 |
| <i>ykvI</i>  | 1,437,400 | 1,438,443 | + | 80   | 78   | 1.03 | 66   | 71   | 0.93 |
| <i>ykvJ</i>  | 1,438,756 | 1,439,415 | + | 126  | 126  | 1.00 | 231  | 252  | 0.91 |
| <i>ykvK</i>  | 1,439,408 | 1,439,857 | + | 171  | 165  | 1.04 | 310  | 318  | 0.98 |
| <i>ykvL</i>  | 1,439,850 | 1,440,581 | + | 180  | 171  | 1.06 | 306  | 314  | 0.97 |
| <i>ykvM</i>  | 1,440,599 | 1,441,096 | + | 290  | 278  | 1.04 | 460  | 429  | 1.07 |
| <i>ykvN</i>  | 1,441,655 | 1,442,011 | - | 122  | 110  | 1.11 | 141  | 182  | 0.78 |
| <i>ykvO</i>  | 1,442,180 | 1,442,926 | + | 48   | 51   | 0.93 | 61   | 59   | 1.03 |
| <i>ykvP</i>  | 1,443,407 | 1,444,606 | + | 66   | 54   | 1.24 | 57   | 45   | 1.27 |
| <i>ykvQ</i>  | 1,444,946 | 1,445,644 | + | 76   | 57   | 1.32 | 70   | 67   | 1.06 |

AbrB regulon

SigD regulon

|              |           |           |   |      |      |      |      |      |      |                        |
|--------------|-----------|-----------|---|------|------|------|------|------|------|------------------------|
| <i>ykvR</i>  | 1,446,559 | 1,446,849 | + | 68   | 67   | 1.02 | 69   | 77   | 0.89 |                        |
| <i>ykvS</i>  | 1,446,970 | 1,447,401 | - | 212  | 186  | 1.14 | 295  | 389  | 0.76 |                        |
| <i>ykvT</i>  | 1,447,814 | 1,448,440 | + | 50   | 50   | 1.00 | 45   | 56   | 0.82 |                        |
| <i>ykvU</i>  | 1,448,558 | 1,449,895 | + | 47   | 51   | 0.92 | 46   | 51   | 0.90 |                        |
| <i>ykvV</i>  | 1,449,946 | 1,450,443 | + | 72   | 70   | 1.04 | 88   | 92   | 0.96 |                        |
| <i>ykvW</i>  | 1,450,679 | 1,452,592 | + | 156  | 129  | 1.21 | 150  | 140  | 1.08 |                        |
| <i>ykvY</i>  | 1,452,999 | 1,454,090 | + | 473  | 487  | 0.97 | 562  | 714  | 0.79 |                        |
| <i>ykvZ</i>  | 1,454,372 | 1,455,337 | + | 99   | 113  | 0.88 | 176  | 227  | 0.78 |                        |
| <i>gleT</i>  | 1,455,400 | 1,456,257 | + | 283  | 317  | 0.89 | 330  | 421  | 0.78 |                        |
| <i>ptsG</i>  | 1,456,496 | 1,458,595 | + | 3253 | 3407 | 0.95 | 3262 | 3293 | 0.99 |                        |
| <i>ptsH</i>  | 1,458,693 | 1,458,959 | + | 4474 | 4824 | 0.93 | 3735 | 3988 | 0.94 |                        |
| <i>ptsI</i>  | 1,458,959 | 1,460,671 | + | 5018 | 5510 | 0.91 | 4170 | 4299 | 0.97 |                        |
| <i>spIA</i>  | 1,460,762 | 1,461,001 | + | 299  | 329  | 0.91 | 285  | 319  | 0.89 |                        |
| <i>spIB</i>  | 1,461,079 | 1,462,107 | + | 210  | 229  | 0.92 | 226  | 249  | 0.91 |                        |
| <i>ykwB</i>  | 1,462,280 | 1,462,801 | - | 615  | 550  | 1.12 | 436  | 397  | 1.10 |                        |
| <i>mcpC</i>  | 1,462,936 | 1,464,900 | + | 2428 | 2795 | 0.87 | 1576 | 1847 | 0.85 | SigD regulon           |
| <i>ykwC</i>  | 1,465,037 | 1,465,903 | + | 2040 | 1689 | 1.21 | 2717 | 2386 | 1.14 |                        |
| <i>ykwD</i>  | 1,465,942 | 1,466,715 | - | 178  | 153  | 1.16 | 219  | 184  | 1.19 |                        |
| <i>ykuA</i>  | 1,467,109 | 1,469,166 | + | 586  | 654  | 0.90 | 553  | 698  | 0.79 | AbrB regulon           |
| <i>kinA</i>  | 1,469,330 | 1,471,150 | + | 299  | 297  | 1.01 | 297  | 339  | 0.88 | Spo0A regulon          |
| <i>patA</i>  | 1,471,161 | 1,472,339 | + | 1003 | 953  | 1.05 | 925  | 907  | 1.02 |                        |
| <i>cheV</i>  | 1,472,906 | 1,473,817 | - | 1075 | 1721 | 0.62 | 840  | 1273 | 0.66 | SigD regulon           |
| <i>ykyB</i>  | 1,473,861 | 1,474,325 | - | 1077 | 977  | 1.10 | 897  | 922  | 0.97 |                        |
| <i>ykuC</i>  | 1,474,451 | 1,475,743 | - | 199  | 151  | 1.31 | 318  | 320  | 0.99 |                        |
| <i>ykuD</i>  | 1,475,819 | 1,476,313 | - | 72   | 65   | 1.12 | 80   | 91   | 0.89 |                        |
| <i>ykuE</i>  | 1,476,370 | 1,477,233 | - | 106  | 102  | 1.05 | 98   | 116  | 0.84 |                        |
| <i>ykuF</i>  | 1,477,376 | 1,478,140 | + | 427  | 308  | 1.39 | 367  | 302  | 1.22 |                        |
| <i>ykuG</i>  | 1,478,441 | 1,480,723 | + | 889  | 405  | 2.20 | 1390 | 785  | 1.77 |                        |
| <i>ykuH</i>  | 1,480,853 | 1,481,401 | + | 472  | 311  | 1.52 | 663  | 653  | 1.02 |                        |
| <i>ykuI</i>  | 1,481,554 | 1,482,777 | + | 559  | 425  | 1.32 | 707  | 670  | 1.06 |                        |
| <i>ykuJ</i>  | 1,483,423 | 1,483,662 | + | 1117 | 875  | 1.28 | 1363 | 1291 | 1.06 |                        |
| <i>ykuK</i>  | 1,483,772 | 1,484,290 | + | 1398 | 1119 | 1.25 | 1540 | 1600 | 0.96 |                        |
| <i>yzkF</i>  | 1,484,424 | 1,484,621 | + | 2185 | 2345 | 0.93 | 3142 | 3377 | 0.93 | Spo0A regulon          |
| <i>ykuL</i>  | 1,484,759 | 1,485,202 | + | 312  | 336  | 0.93 | 341  | 314  | 1.09 | Spo0A regulon          |
| <i>ccpC</i>  | 1,485,351 | 1,486,232 | + | 203  | 202  | 1.00 | 328  | 429  | 0.76 |                        |
| <i>ykuN</i>  | 1,486,344 | 1,486,820 | + | 824  | 1413 | 0.58 | 230  | 529  | 0.44 |                        |
| <i>ykuO</i>  | 1,486,810 | 1,487,703 | + | 649  | 1043 | 0.62 | 124  | 298  | 0.42 |                        |
| <i>ykuP</i>  | 1,487,719 | 1,488,255 | + | 497  | 803  | 0.62 | 115  | 270  | 0.43 |                        |
| <i>ykuQ</i>  | 1,488,280 | 1,488,990 | + | 3422 | 3215 | 1.06 | 3552 | 3009 | 1.18 |                        |
| <i>ykuR</i>  | 1,489,060 | 1,490,184 | + | 1031 | 1050 | 0.98 | 1221 | 1092 | 1.12 |                        |
| <i>ykuS</i>  | 1,490,246 | 1,490,491 | + | 1266 | 1239 | 1.02 | 1337 | 1175 | 1.14 |                        |
| <i>ykuT</i>  | 1,490,528 | 1,491,331 | - | 424  | 263  | 1.61 | 291  | 219  | 1.32 |                        |
| <i>ykuU</i>  | 1,491,568 | 1,492,110 | + | 1367 | 1224 | 1.12 | 1688 | 1440 | 1.17 | AbrB regulon           |
| <i>ykuV</i>  | 1,492,182 | 1,492,643 | + | 604  | 526  | 1.15 | 816  | 717  | 1.14 | Spo0A and AbrB regulon |
| <i>rok</i>   | 1,493,094 | 1,493,669 | + | 307  | 330  | 0.93 | 488  | 607  | 0.80 | Spo0A regulon          |
| <i>yknT</i>  | 1,493,710 | 1,494,675 | - | 54   | 59   | 0.91 | 44   | 52   | 0.83 |                        |
| <i>mobA</i>  | 1,494,812 | 1,495,411 | + | 483  | 382  | 1.26 | 731  | 574  | 1.27 |                        |
| <i>moeB</i>  | 1,495,462 | 1,496,481 | + | 507  | 433  | 1.17 | 795  | 660  | 1.20 |                        |
| <i>moeA</i>  | 1,496,499 | 1,497,791 | + | 510  | 411  | 1.24 | 815  | 638  | 1.28 |                        |
| <i>mobB</i>  | 1,497,752 | 1,498,273 | + | 608  | 465  | 1.31 | 963  | 786  | 1.22 |                        |
| <i>moaE</i>  | 1,498,273 | 1,498,746 | + | 1206 | 982  | 1.23 | 1857 | 1590 | 1.17 |                        |
| <i>moaD</i>  | 1,498,739 | 1,498,972 | + | 84   | 85   | 0.99 | 313  | 243  | 1.29 |                        |
| <i>yknU</i>  | 1,499,196 | 1,500,953 | + | 93   | 93   | 1.00 | 97   | 102  | 0.95 |                        |
| <i>yknV</i>  | 1,500,965 | 1,502,779 | + | 110  | 106  | 1.04 | 106  | 114  | 0.93 |                        |
| <i>yknW</i>  | 1,502,889 | 1,503,584 | + | 2537 | 2495 | 1.02 | 3192 | 3238 | 0.99 | AbrB regulon           |
| <i>yknX</i>  | 1,503,589 | 1,504,722 | + | 1073 | 1064 | 1.01 | 2759 | 3093 | 0.89 | AbrB regulon           |
| <i>yknY</i>  | 1,504,723 | 1,505,415 | + | 1018 | 1013 | 1.01 | 2580 | 2653 | 0.97 | AbrB regulon           |
| <i>yknZ</i>  | 1,505,412 | 1,506,605 | + | 1066 | 1053 | 1.01 | 2303 | 2400 | 0.96 | AbrB regulon           |
| <i>fruR</i>  | 1,506,885 | 1,507,640 | + | 801  | 934  | 0.86 | 560  | 388  | 1.44 | Spo0A regulon          |
| <i>fruK</i>  | 1,507,637 | 1,508,548 | + | 508  | 614  | 0.83 | 236  | 188  | 1.26 |                        |
| <i>fruA</i>  | 1,508,563 | 1,510,470 | + | 529  | 641  | 0.83 | 359  | 339  | 1.06 |                        |
| <i>sipT</i>  | 1,510,615 | 1,511,196 | + | 408  | 368  | 1.11 | 408  | 465  | 0.88 |                        |
| <i>ykoA</i>  | 1,511,230 | 1,511,499 | - | 34   | 42   | 0.81 | 129  | 150  | 0.86 |                        |
| <i>ykpA</i>  | 1,511,680 | 1,513,302 | + | 916  | 901  | 1.02 | 1117 | 1406 | 0.79 |                        |
| <i>ykpB</i>  | 1,513,359 | 1,514,270 | + | 454  | 519  | 0.87 | 425  | 566  | 0.75 |                        |
| <i>ampS</i>  | 1,514,304 | 1,515,536 | - | 479  | 418  | 1.15 | 850  | 832  | 1.02 |                        |
| <i>mreBH</i> | 1,515,881 | 1,516,888 | - | 417  | 240  | 1.73 | 738  | 451  | 1.64 |                        |
| <i>abh</i>   | 1,517,172 | 1,517,450 | + | 1334 | 1133 | 1.18 | 2048 | 1612 | 1.27 |                        |
| <i>kinC</i>  | 1,517,640 | 1,518,926 | + | 564  | 490  | 1.15 | 681  | 675  | 1.01 | Spo0A regulon          |
| <i>ykqA</i>  | 1,518,942 | 1,519,775 | + | 578  | 489  | 1.18 | 684  | 716  | 0.96 |                        |
| <i>ykqB</i>  | 1,519,838 | 1,520,503 | + | 753  | 718  | 1.05 | 790  | 801  | 0.99 |                        |
| <i>adeC</i>  | 1,520,658 | 1,522,391 | + | 360  | 317  | 1.14 | 562  | 505  | 1.11 |                        |
| <i>ykqC</i>  | 1,522,425 | 1,524,092 | - | 1856 | 1924 | 0.96 | 2289 | 2711 | 0.84 |                        |
| <i>yzkG</i>  | 1,524,098 | 1,524,307 | - | 1755 | 2125 | 0.83 | 1766 | 2279 | 0.77 |                        |
| <i>ykrA</i>  | 1,524,693 | 1,525,466 | + | 554  | 491  | 1.13 | 652  | 594  | 1.10 |                        |
| <i>ykrB</i>  | 1,525,502 | 1,526,056 | - | 274  | 213  | 1.29 | 485  | 551  | 0.88 |                        |
| <i>ykyA</i>  | 1,526,592 | 1,527,209 | + | 403  | 359  | 1.12 | 526  | 558  | 0.94 |                        |
| <i>pdhA</i>  | 1,527,633 | 1,528,748 | + | 3417 | 2763 | 1.24 | 3139 | 3291 | 0.95 |                        |
| <i>pdhB</i>  | 1,528,752 | 1,529,729 | + | 3957 | 3636 | 1.09 | 3371 | 3478 | 0.97 |                        |
| <i>pdhC</i>  | 1,529,844 | 1,531,172 | + | 5243 | 5235 | 1.00 | 4565 | 4587 | 1.00 |                        |
| <i>pdhD</i>  | 1,531,177 | 1,532,589 | + | 3962 | 4055 | 0.98 | 3474 | 3464 | 1.00 |                        |
| <i>slp</i>   | 1,532,634 | 1,533,008 | - | 43   | 43   | 1.01 | 65   | 64   | 1.01 |                        |
| <i>speA</i>  | 1,533,586 | 1,535,058 | - | 134  | 169  | 0.79 | 201  | 209  | 0.96 |                        |
| <i>yktA</i>  | 1,535,243 | 1,535,509 | + | 384  | 373  | 1.03 | 721  | 762  | 0.95 |                        |
| <i>yktB</i>  | 1,535,542 | 1,536,180 | - | 760  | 630  | 1.21 | 1083 | 979  | 1.11 |                        |
| <i>yzkI</i>  | 1,536,420 | 1,536,608 | + | 2961 | 3299 | 0.90 | 2204 | 1228 | 1.80 |                        |
| <i>yktC</i>  | 1,536,748 | 1,537,545 | + | 1181 | 1356 | 0.87 | 861  | 690  | 1.25 |                        |
| <i>yzkC</i>  | 1,537,571 | 1,537,999 | + | 621  | 611  | 1.02 | 489  | 455  | 1.07 |                        |
| <i>yktD</i>  | 1,538,077 | 1,538,991 | - | 161  | 124  | 1.30 | 153  | 119  | 1.28 |                        |
| <i>nprE</i>  | 1,539,343 | 1,540,908 | - | 149  | 149  | 1.00 | 201  | 224  | 0.90 | AbrB regulon           |
| <i>ylaA</i>  | 1,541,193 | 1,543,133 | + | 55   | 60   | 0.91 | 64   | 67   | 0.96 |                        |

|                 |           |           |   |      |      |      |      |      |      |               |
|-----------------|-----------|-----------|---|------|------|------|------|------|------|---------------|
| <i>ylaB</i>     | 1,543,123 | 1,543,392 | + | 50   | 40   | 1.25 | 63   | 57   | 1.11 |               |
| <i>ylaC</i>     | 1,543,392 | 1,543,913 | + | 76   | 66   | 1.16 | 100  | 94   | 1.06 |               |
| <i>ylaD</i>     | 1,543,910 | 1,544,203 | + | 65   | 63   | 1.04 | 83   | 83   | 0.99 |               |
| <i>ylaE</i>     | 1,544,243 | 1,544,854 | - | 332  | 441  | 0.75 | 287  | 365  | 0.79 | AbrB regulon  |
| <i>ylaF</i>     | 1,545,127 | 1,545,315 | - | 2542 | 2395 | 1.06 | 1875 | 1612 | 1.16 |               |
| <i>ylaG</i>     | 1,545,428 | 1,547,266 | + | 1060 | 1023 | 1.04 | 1174 | 1546 | 0.76 |               |
| <i>ylaH</i>     | 1,547,323 | 1,547,640 | + | 173  | 172  | 1.01 | 372  | 449  | 0.83 |               |
| <i>ylaI</i>     | 1,547,696 | 1,547,905 | - | 389  | 445  | 0.87 | 450  | 572  | 0.79 |               |
| <i>ylaJ</i>     | 1,547,988 | 1,548,617 | - | 62   | 69   | 0.90 | 55   | 69   | 0.80 |               |
| <i>ylaK</i>     | 1,548,772 | 1,550,100 | + | 76   | 67   | 1.13 | 64   | 69   | 0.92 |               |
| <i>ylaL</i>     | 1,550,104 | 1,550,589 | - | 1449 | 1705 | 0.85 | 1505 | 1614 | 0.93 |               |
| <i>ylaM</i>     | 1,550,692 | 1,551,621 | + | 123  | 116  | 1.07 | 115  | 125  | 0.92 |               |
| <i>ylaN</i>     | 1,551,719 | 1,552,000 | + | 1202 | 1622 | 0.74 | 1067 | 1504 | 0.71 |               |
| <i>ftsW</i>     | 1,552,206 | 1,553,417 | + | 469  | 418  | 1.12 | 588  | 607  | 0.97 |               |
| <i>pycA</i>     | 1,553,492 | 1,556,938 | + | 2358 | 2092 | 1.13 | 2870 | 2550 | 1.13 |               |
| <i>ctaA</i>     | 1,557,341 | 1,558,261 | - | 1067 | 1027 | 1.04 | 343  | 341  | 1.01 |               |
| <i>ctaB</i>     | 1,558,616 | 1,559,533 | + | 1420 | 1697 | 0.84 | 1161 | 1320 | 0.88 |               |
| <i>ctaC</i>     | 1,559,773 | 1,560,843 | + | 777  | 1176 | 0.66 | 513  | 807  | 0.64 | AbrB regulon  |
| <i>ctaD</i>     | 1,560,876 | 1,562,744 | + | 704  | 1118 | 0.63 | 521  | 805  | 0.65 | AbrB regulon  |
| <i>ctaE</i>     | 1,562,744 | 1,563,367 | + | 551  | 949  | 0.58 | 463  | 738  | 0.63 | AbrB regulon  |
| <i>ctaF</i>     | 1,563,370 | 1,563,702 | + | 535  | 861  | 0.62 | 367  | 681  | 0.54 | AbrB regulon  |
| <i>ctaG</i>     | 1,563,729 | 1,564,622 | + | 322  | 556  | 0.58 | 274  | 434  | 0.63 | AbrB regulon  |
| <i>ylbA</i>     | 1,564,654 | 1,565,016 | - | 1156 | 1603 | 0.72 | 1233 | 1640 | 0.75 | AbrB regulon  |
| <i>ylbB</i>     | 1,565,156 | 1,565,608 | + | 226  | 219  | 1.03 | 245  | 273  | 0.90 |               |
| <i>ylbC</i>     | 1,565,685 | 1,566,725 | + | 445  | 378  | 1.18 | 573  | 483  | 1.19 |               |
| <i>ylbD</i>     | 1,566,957 | 1,567,355 | + | 94   | 88   | 1.07 | 89   | 120  | 0.74 |               |
| <i>ylbE</i>     | 1,567,371 | 1,567,610 | + | 49   | 51   | 0.97 | 57   | 61   | 0.92 |               |
| <i>ylbF</i>     | 1,567,726 | 1,568,175 | + | 602  | 577  | 1.04 | 772  | 889  | 0.87 |               |
| <i>ylbG</i>     | 1,568,230 | 1,568,502 | + | 367  | 358  | 1.02 | 492  | 594  | 0.83 |               |
| <i>ylbH</i>     | 1,568,825 | 1,569,319 | + | 335  | 305  | 1.10 | 611  | 697  | 0.88 |               |
| <i>ylbI</i>     | 1,569,383 | 1,569,868 | + | 286  | 253  | 1.13 | 493  | 565  | 0.87 |               |
| <i>ylbJ</i>     | 1,569,879 | 1,571,105 | - | 42   | 46   | 0.90 | 38   | 49   | 0.79 |               |
| <i>ylbK</i>     | 1,571,286 | 1,572,068 | + | 204  | 181  | 1.12 | 269  | 308  | 0.87 |               |
| <i>ylbL</i>     | 1,572,070 | 1,573,122 | + | 282  | 267  | 1.05 | 444  | 504  | 0.88 |               |
| <i>ylbM</i>     | 1,573,111 | 1,574,358 | - | 144  | 160  | 0.90 | 169  | 196  | 0.86 |               |
| <i>ylbN</i>     | 1,574,568 | 1,575,086 | + | 2400 | 2271 | 1.06 | 2733 | 3156 | 0.87 |               |
| <i>rpmF</i>     | 1,575,108 | 1,575,287 | + | 3434 | 4011 | 0.86 | 4200 | 4116 | 1.02 |               |
| <i>ylbO</i>     | 1,575,433 | 1,576,014 | + | 172  | 183  | 0.94 | 158  | 197  | 0.80 |               |
| <i>ylbP</i>     | 1,576,071 | 1,576,553 | - | 1033 | 1506 | 0.69 | 928  | 1293 | 0.72 |               |
| <i>ylbQ</i>     | 1,576,713 | 1,577,609 | + | 201  | 185  | 1.09 | 268  | 322  | 0.83 |               |
| <i>ylIA</i>     | 1,577,680 | 1,579,299 | + | 295  | 278  | 1.06 | 564  | 634  | 0.89 |               |
| <i>ylIB</i>     | 1,579,425 | 1,579,856 | + | 1628 | 1867 | 0.87 | 1783 | 2194 | 0.81 |               |
| <i>ylxA</i>     | 1,579,926 | 1,580,861 | + | 1042 | 1127 | 0.92 | 1213 | 1540 | 0.79 |               |
| <i>ftsL</i>     | 1,580,901 | 1,581,254 | + | 1407 | 1935 | 0.73 | 1850 | 2326 | 0.80 |               |
| <i>pbpB</i>     | 1,581,251 | 1,583,401 | + | 373  | 483  | 0.77 | 697  | 908  | 0.77 |               |
| <i>spoVD</i>    | 1,583,518 | 1,585,455 | + | 109  | 102  | 1.07 | 114  | 124  | 0.92 |               |
| <i>murE</i>     | 1,585,631 | 1,587,115 | + | 859  | 582  | 1.48 | 1352 | 1328 | 1.02 |               |
| <i>mraY</i>     | 1,587,228 | 1,588,202 | + | 667  | 416  | 1.61 | 1086 | 1015 | 1.07 |               |
| <i>murD</i>     | 1,588,203 | 1,589,558 | + | 953  | 670  | 1.42 | 1761 | 1631 | 1.08 |               |
| <i>spoVE</i>    | 1,589,619 | 1,590,719 | + | 461  | 305  | 1.51 | 748  | 710  | 1.05 |               |
| <i>murG</i>     | 1,590,842 | 1,591,933 | + | 460  | 339  | 1.35 | 1137 | 940  | 1.21 |               |
| <i>murB</i>     | 1,591,960 | 1,592,871 | + | 610  | 482  | 1.27 | 1348 | 1130 | 1.19 |               |
| <i>divIB</i>    | 1,593,002 | 1,593,793 | + | 538  | 454  | 1.18 | 894  | 821  | 1.09 |               |
| <i>ylxW</i>     | 1,593,790 | 1,594,485 | + | 536  | 453  | 1.18 | 1023 | 908  | 1.13 |               |
| <i>ylxX</i>     | 1,594,508 | 1,595,215 | + | 571  | 562  | 1.02 | 950  | 930  | 1.02 |               |
| <i>shp</i>      | 1,595,233 | 1,595,598 | + | 185  | 219  | 0.85 | 534  | 604  | 0.88 |               |
| <i>ftsA</i>     | 1,595,772 | 1,597,094 | + | 2008 | 2035 | 0.99 | 2004 | 2053 | 0.98 |               |
| <i>ftsZ</i>     | 1,597,130 | 1,598,278 | + | 3084 | 2933 | 1.05 | 3351 | 3117 | 1.07 |               |
| <i>bpr</i>      | 1,598,580 | 1,602,881 | + | 117  | 123  | 0.95 | 130  | 128  | 1.02 |               |
| <i>spoIIIGA</i> | 1,603,076 | 1,604,005 | + | 39   | 41   | 0.96 | 43   | 49   | 0.89 | Spo0A regulon |
| <i>sigE</i>     | 1,604,068 | 1,604,787 | + | 47   | 44   | 1.07 | 59   | 64   | 0.93 |               |
| <i>sigG</i>     | 1,604,927 | 1,605,709 | + | 51   | 55   | 0.92 | 57   | 71   | 0.80 | AbrB regulon  |
| <i>ylmA</i>     | 1,605,857 | 1,606,651 | + | 391  | 322  | 1.22 | 709  | 733  | 0.97 |               |
| <i>ylmB</i>     | 1,606,853 | 1,608,133 | + | 427  | 401  | 1.06 | 760  | 705  | 1.08 |               |
| <i>ylmC</i>     | 1,608,216 | 1,608,461 | + | 653  | 628  | 1.04 | 1105 | 1080 | 1.02 |               |
| <i>ylmD</i>     | 1,608,624 | 1,609,460 | + | 1686 | 1521 | 1.11 | 1787 | 1751 | 1.02 | Spo0A regulon |
| <i>ylmE</i>     | 1,609,473 | 1,610,165 | + | 2547 | 2002 | 1.27 | 2546 | 2350 | 1.08 |               |
| <i>ylmF</i>     | 1,610,168 | 1,610,617 | + | 2548 | 2123 | 1.20 | 2788 | 2529 | 1.10 |               |
| <i>ylmG</i>     | 1,610,624 | 1,610,896 | + | 1391 | 1149 | 1.21 | 1799 | 1639 | 1.10 |               |
| <i>ylmH</i>     | 1,610,957 | 1,611,730 | + | 729  | 651  | 1.12 | 1136 | 1197 | 0.95 |               |
| <i>divIVA</i>   | 1,611,824 | 1,612,318 | + | 939  | 926  | 1.01 | 1527 | 1795 | 0.85 | Spo0A regulon |
| <i>ileS</i>     | 1,612,660 | 1,615,425 | + | 858  | 881  | 0.97 | 1523 | 1599 | 0.95 |               |
| <i>ylxA</i>     | 1,615,503 | 1,615,946 | + | 28   | 34   | 0.83 | 33   | 35   | 0.95 |               |
| <i>lspA</i>     | 1,616,049 | 1,616,513 | + | 271  | 265  | 1.02 | 387  | 475  | 0.81 |               |
| <i>ylxB</i>     | 1,616,515 | 1,617,426 | + | 363  | 306  | 1.19 | 606  | 669  | 0.91 |               |
| <i>pyrR</i>     | 1,617,609 | 1,618,154 | + | 237  | 530  | 0.45 | 749  | 1055 | 0.71 |               |
| <i>pyrP</i>     | 1,618,326 | 1,619,630 | + | 342  | 370  | 0.92 | 726  | 915  | 0.79 |               |
| <i>pyrB</i>     | 1,619,776 | 1,620,690 | + | 193  | 206  | 0.94 | 582  | 728  | 0.80 |               |
| <i>pyrC</i>     | 1,620,674 | 1,621,960 | + | 310  | 338  | 0.92 | 1014 | 1227 | 0.83 |               |
| <i>pyrAA</i>    | 1,621,957 | 1,623,051 | + | 533  | 612  | 0.87 | 1393 | 1683 | 0.83 |               |
| <i>pyrAB</i>    | 1,623,036 | 1,626,251 | + | 1060 | 1181 | 0.90 | 1566 | 1786 | 0.88 |               |
| <i>pyrK</i>     | 1,626,248 | 1,627,018 | + | 1041 | 1216 | 0.86 | 1264 | 1461 | 0.87 |               |
| <i>pyrD</i>     | 1,627,018 | 1,627,953 | + | 1720 | 1861 | 0.92 | 1715 | 1911 | 0.90 |               |
| <i>pyrF</i>     | 1,627,922 | 1,628,641 | + | 1632 | 1793 | 0.91 | 1609 | 1814 | 0.89 |               |
| <i>pyrE</i>     | 1,628,620 | 1,629,270 | + | 1426 | 1511 | 0.94 | 1180 | 1385 | 0.85 |               |
| <i>cysH</i>     | 1,629,682 | 1,630,383 | + | 3644 | 3151 | 1.16 | 3315 | 3543 | 0.94 |               |
| <i>cysP</i>     | 1,630,395 | 1,631,459 | + | 2937 | 2414 | 1.22 | 2860 | 3000 | 0.95 |               |
| <i>sat</i>      | 1,631,508 | 1,632,656 | + | 3578 | 3142 | 1.14 | 3853 | 3803 | 1.01 |               |
| <i>cysC</i>     | 1,632,669 | 1,633,262 | + | 3175 | 2899 | 1.10 | 3035 | 2872 | 1.06 |               |
| <i>ylnD</i>     | 1,633,361 | 1,634,134 | + | 3283 | 3119 | 1.05 | 3306 | 3301 | 1.00 |               |
| <i>ylnE</i>     | 1,634,137 | 1,634,922 | + | 3359 | 3132 | 1.07 | 3260 | 3105 | 1.05 |               |

|              |           |           |   |      |      |      |      |      |      |
|--------------|-----------|-----------|---|------|------|------|------|------|------|
| <i>ylnF</i>  | 1,634,903 | 1,635,391 | + | 2641 | 2572 | 1.03 | 3362 | 3159 | 1.06 |
| <i>yloA</i>  | 1,635,431 | 1,637,149 | - | 359  | 349  | 1.03 | 433  | 503  | 0.86 |
| <i>yloB</i>  | 1,637,265 | 1,639,937 | + | 112  | 117  | 0.95 | 123  | 136  | 0.91 |
| <i>yloC</i>  | 1,640,020 | 1,640,895 | + | 1354 | 1160 | 1.17 | 1409 | 1602 | 0.88 |
| <i>ylzA</i>  | 1,640,972 | 1,641,241 | + | 1562 | 1239 | 1.26 | 1581 | 1744 | 0.91 |
| <i>gmk</i>   | 1,641,249 | 1,641,863 | + | 1209 | 1002 | 1.21 | 1665 | 1804 | 0.92 |
| <i>yloH</i>  | 1,641,867 | 1,642,070 | + | 1738 | 1277 | 1.36 | 1842 | 2085 | 0.88 |
| <i>yloI</i>  | 1,642,151 | 1,643,371 | + | 242  | 201  | 1.21 | 474  | 465  | 1.02 |
| <i>priA</i>  | 1,643,368 | 1,645,785 | + | 296  | 285  | 1.04 | 541  | 543  | 1.00 |
| <i>def</i>   | 1,645,812 | 1,646,294 | + | 363  | 355  | 1.02 | 670  | 682  | 0.98 |
| <i>fmt</i>   | 1,646,299 | 1,647,252 | + | 607  | 589  | 1.03 | 950  | 1052 | 0.90 |
| <i>yloM</i>  | 1,647,239 | 1,648,582 | + | 639  | 603  | 1.06 | 1019 | 1042 | 0.98 |
| <i>yloN</i>  | 1,648,586 | 1,649,677 | + | 965  | 973  | 0.99 | 1425 | 1390 | 1.03 |
| <i>prpC</i>  | 1,649,684 | 1,650,448 | + | 547  | 641  | 0.85 | 1065 | 1146 | 0.93 |
| <i>prkC</i>  | 1,650,442 | 1,652,388 | + | 554  | 656  | 0.84 | 1178 | 1362 | 0.87 |
| <i>yloQ</i>  | 1,652,403 | 1,653,299 | + | 1157 | 910  | 1.27 | 1100 | 1091 | 1.01 |
| <i>rpe</i>   | 1,653,304 | 1,653,957 | + | 796  | 627  | 1.27 | 704  | 736  | 0.96 |
| <i>yloS</i>  | 1,654,030 | 1,654,674 | + | 437  | 316  | 1.39 | 457  | 504  | 0.91 |
| <i>rpmB</i>  | 1,654,899 | 1,655,087 | - | 228  | 331  | 0.69 | 1880 | 1970 | 0.95 |
| <i>yloU</i>  | 1,655,364 | 1,655,726 | + | 1305 | 1306 | 1.00 | 1952 | 2068 | 0.94 |
| <i>yloV</i>  | 1,655,742 | 1,657,403 | + | 979  | 1006 | 0.97 | 1436 | 1465 | 0.98 |
| <i>sdaAB</i> | 1,657,542 | 1,658,204 | + | 534  | 492  | 1.09 | 421  | 379  | 1.11 |
| <i>sdaAA</i> | 1,658,230 | 1,659,132 | + | 824  | 694  | 1.19 | 707  | 627  | 1.13 |
| <i>recG</i>  | 1,659,110 | 1,661,158 | + | 616  | 452  | 1.36 | 556  | 475  | 1.17 |
| <i>ylpC</i>  | 1,661,267 | 1,661,833 | + | 3237 | 3696 | 0.88 | 2657 | 2994 | 0.89 |
| <i>plsX</i>  | 1,661,847 | 1,662,848 | + | 2175 | 2412 | 0.90 | 1827 | 2271 | 0.80 |
| <i>fabD</i>  | 1,662,867 | 1,663,820 | + | 2526 | 2544 | 0.99 | 2560 | 2978 | 0.86 |
| <i>fabG</i>  | 1,663,813 | 1,664,553 | + | 3794 | 3652 | 1.04 | 3499 | 4024 | 0.87 |
| <i>acpA</i>  | 1,664,637 | 1,664,870 | + | 4068 | 4537 | 0.90 | 5021 | 4877 | 1.03 |
| <i>rnc</i>   | 1,665,010 | 1,665,759 | + | 1338 | 1004 | 1.33 | 1463 | 1597 | 0.92 |
| <i>smc</i>   | 1,665,860 | 1,669,420 | + | 397  | 338  | 1.18 | 675  | 673  | 1.00 |
| <i>ftsY</i>  | 1,669,440 | 1,670,429 | + | 389  | 345  | 1.13 | 729  | 661  | 1.10 |
| <i>ylqB</i>  | 1,670,466 | 1,670,951 | - | 3773 | 4902 | 0.77 | 3710 | 4263 | 0.87 |
| <i>ylxM</i>  | 1,671,128 | 1,671,460 | + | 4095 | 3918 | 1.05 | 3482 | 3986 | 0.87 |
| <i>ffh</i>   | 1,671,474 | 1,672,814 | + | 3188 | 3336 | 0.96 | 2909 | 3272 | 0.89 |
| <i>rpsP</i>  | 1,672,920 | 1,673,192 | + | 3513 | 4033 | 0.87 | 2684 | 2854 | 0.94 |
| <i>ylqC</i>  | 1,673,192 | 1,673,437 | + | 2743 | 2795 | 0.98 | 1359 | 1401 | 0.97 |
| <i>ylqD</i>  | 1,673,559 | 1,673,945 | + | 523  | 565  | 0.93 | 880  | 1085 | 0.81 |
| <i>rimM</i>  | 1,673,950 | 1,674,474 | + | 1071 | 1095 | 0.98 | 1202 | 1529 | 0.79 |
| <i>trmD</i>  | 1,674,471 | 1,675,202 | + | 1127 | 966  | 1.17 | 1127 | 1175 | 0.96 |
| <i>rplS</i>  | 1,675,333 | 1,675,689 | + | 7149 | 8018 | 0.89 | 6668 | 6386 | 1.04 |
| <i>ylqF</i>  | 1,675,832 | 1,676,680 | + | 313  | 330  | 0.95 | 442  | 601  | 0.74 |
| <i>rnhB</i>  | 1,676,751 | 1,677,518 | + | 1342 | 1366 | 0.98 | 1092 | 1272 | 0.86 |
| <i>ylqG</i>  | 1,677,550 | 1,679,280 | + | 1261 | 1186 | 1.06 | 850  | 1022 | 0.83 |
| <i>ylqH</i>  | 1,679,277 | 1,679,558 | + | 780  | 675  | 1.16 | 600  | 776  | 0.77 |
| <i>sucC</i>  | 1,679,731 | 1,680,888 | + | 4610 | 5112 | 0.90 | 4597 | 4688 | 0.98 |
| <i>sucD</i>  | 1,680,917 | 1,681,819 | + | 4475 | 5133 | 0.87 | 4492 | 4662 | 0.96 |
| <i>smf</i>   | 1,681,880 | 1,682,773 | + | 343  | 430  | 0.80 | 511  | 745  | 0.69 |
| <i>topA</i>  | 1,682,961 | 1,685,036 | + | 869  | 863  | 1.01 | 1194 | 1351 | 0.88 |
| <i>gid</i>   | 1,685,112 | 1,686,419 | + | 382  | 306  | 1.25 | 741  | 678  | 1.09 |
| <i>codV</i>  | 1,686,487 | 1,687,401 | + | 1121 | 868  | 1.29 | 1538 | 1394 | 1.10 |
| <i>clpQ</i>  | 1,687,414 | 1,687,959 | + | 985  | 788  | 1.25 | 1524 | 1452 | 1.05 |
| <i>clpY</i>  | 1,687,976 | 1,689,379 | + | 1577 | 1246 | 1.27 | 2045 | 1870 | 1.09 |
| <i>codY</i>  | 1,689,419 | 1,690,198 | + | 1390 | 1109 | 1.25 | 1766 | 1570 | 1.12 |
| <i>flgB</i>  | 1,690,578 | 1,690,967 | + | 1485 | 1645 | 0.90 | 1124 | 1408 | 0.80 |
| <i>flgC</i>  | 1,690,967 | 1,691,419 | + | 2517 | 2861 | 0.88 | 2093 | 2313 | 0.90 |
| <i>fljE</i>  | 1,691,430 | 1,691,750 | + | 1547 | 1810 | 0.85 | 1450 | 1615 | 0.90 |
| <i>fljF</i>  | 1,691,796 | 1,693,406 | + | 2405 | 2527 | 0.95 | 2131 | 2399 | 0.89 |
| <i>fljG</i>  | 1,693,419 | 1,694,435 | + | 2517 | 2539 | 0.99 | 2197 | 2421 | 0.91 |
| <i>fljH</i>  | 1,694,553 | 1,695,179 | + | 2613 | 2697 | 0.97 | 2390 | 2613 | 0.91 |
| <i>fljI</i>  | 1,695,166 | 1,696,488 | + | 1993 | 2101 | 0.95 | 2033 | 2228 | 0.91 |
| <i>fljJ</i>  | 1,696,491 | 1,696,934 | + | 2557 | 2663 | 0.96 | 2374 | 2718 | 0.87 |
| <i>ylxH</i>  | 1,696,946 | 1,697,587 | + | 1836 | 1872 | 0.98 | 2047 | 2179 | 0.94 |
| <i>fljK</i>  | 1,697,748 | 1,699,037 | + | 1457 | 1530 | 0.95 | 1747 | 1796 | 0.97 |
| <i>ylxG</i>  | 1,699,034 | 1,699,456 | + | 1425 | 1504 | 0.95 | 1800 | 1768 | 1.02 |
| <i>flgE</i>  | 1,699,478 | 1,700,272 | + | 2187 | 2313 | 0.95 | 2741 | 2789 | 0.98 |
| <i>fljL</i>  | 1,700,524 | 1,700,946 | + | 1770 | 1746 | 1.01 | 1972 | 2163 | 0.91 |
| <i>fljM</i>  | 1,700,980 | 1,701,978 | + | 2553 | 2805 | 0.91 | 2848 | 2795 | 1.02 |
| <i>fljY</i>  | 1,701,968 | 1,703,104 | + | 2415 | 2629 | 0.92 | 2736 | 2763 | 0.99 |
| <i>cheY</i>  | 1,703,130 | 1,703,492 | + | 2214 | 2356 | 0.94 | 2486 | 2444 | 1.02 |
| <i>fljZ</i>  | 1,703,507 | 1,704,166 | + | 1970 | 2147 | 0.92 | 2151 | 2296 | 0.94 |
| <i>fljP</i>  | 1,704,159 | 1,704,824 | + | 1657 | 1791 | 0.93 | 1917 | 2082 | 0.92 |
| <i>fljQ</i>  | 1,704,839 | 1,705,108 | + | 1434 | 1541 | 0.93 | 1729 | 1892 | 0.91 |
| <i>fljR</i>  | 1,705,116 | 1,705,895 | + | 1216 | 1323 | 0.92 | 1444 | 1599 | 0.90 |
| <i>flhB</i>  | 1,705,895 | 1,706,977 | + | 1345 | 1512 | 0.89 | 1646 | 1815 | 0.91 |
| <i>flhA</i>  | 1,707,010 | 1,709,043 | + | 1208 | 1331 | 0.91 | 1490 | 1657 | 0.90 |
| <i>flhF</i>  | 1,709,043 | 1,710,143 | + | 1199 | 1373 | 0.87 | 1608 | 1700 | 0.95 |
| <i>ylxI</i>  | 1,710,134 | 1,711,030 | + | 942  | 1064 | 0.88 | 1293 | 1387 | 0.93 |
| <i>cheB</i>  | 1,711,032 | 1,712,105 | + | 1212 | 1347 | 0.90 | 1665 | 1744 | 0.95 |
| <i>cheA</i>  | 1,712,111 | 1,714,126 | + | 1700 | 1961 | 0.87 | 1983 | 2010 | 0.99 |
| <i>cheW</i>  | 1,714,148 | 1,714,618 | + | 2063 | 2508 | 0.82 | 2604 | 2618 | 0.99 |
| <i>cheC</i>  | 1,714,637 | 1,715,266 | + | 1981 | 2239 | 0.88 | 1953 | 1970 | 0.99 |
| <i>cheD</i>  | 1,715,263 | 1,715,763 | + | 1515 | 1716 | 0.88 | 1636 | 1634 | 1.00 |
| <i>sigD</i>  | 1,715,786 | 1,716,550 | + | 2203 | 2435 | 0.90 | 2402 | 2345 | 1.02 |
| <i>ylxL</i>  | 1,716,579 | 1,717,082 | + | 1855 | 1970 | 0.94 | 1856 | 1811 | 1.02 |
| <i>rpsB</i>  | 1,717,226 | 1,717,966 | + | 3968 | 4001 | 0.99 | 4025 | 4069 | 0.99 |
| <i>tsf</i>   | 1,718,068 | 1,718,949 | + | 3057 | 3165 | 0.97 | 3873 | 4132 | 0.94 |
| <i>pyrH</i>  | 1,719,095 | 1,719,817 | + | 1137 | 1050 | 1.08 | 2026 | 2307 | 0.88 |
| <i>frr</i>   | 1,719,819 | 1,720,376 | + | 592  | 545  | 1.09 | 1190 | 1344 | 0.89 |
| <i>uppS</i>  | 1,720,507 | 1,721,289 | + | 845  | 812  | 1.04 | 1107 | 1257 | 0.88 |
| <i>cdsA</i>  | 1,721,293 | 1,722,102 | + | 430  | 370  | 1.16 | 707  | 833  | 0.85 |

AbrB and SigD regulon

Spo0A and SigD regulon

|                 |           |           |   |      |      |      |      |      |      |
|-----------------|-----------|-----------|---|------|------|------|------|------|------|
| <i>dxr</i>      | 1,722,164 | 1,723,330 | + | 782  | 662  | 1.18 | 1337 | 1446 | 0.92 |
| <i>yluC</i>     | 1,723,321 | 1,724,589 | + | 1144 | 999  | 1.14 | 1694 | 1759 | 0.96 |
| <i>proS</i>     | 1,724,622 | 1,726,316 | + | 876  | 782  | 1.12 | 1506 | 1465 | 1.03 |
| <i>polC</i>     | 1,726,425 | 1,730,738 | + | 427  | 394  | 1.08 | 714  | 732  | 0.98 |
| <i>ylxS</i>     | 1,731,068 | 1,731,538 | + | 1238 | 1213 | 1.02 | 1935 | 2332 | 0.83 |
| <i>nusA</i>     | 1,731,573 | 1,732,688 | + | 1760 | 1714 | 1.03 | 2517 | 2904 | 0.87 |
| <i>ylxR</i>     | 1,732,702 | 1,732,977 | + | 1811 | 1951 | 0.93 | 3156 | 3413 | 0.92 |
| <i>ylxQ</i>     | 1,732,979 | 1,733,281 | + | 2017 | 2170 | 0.93 | 3545 | 3614 | 0.98 |
| <i>infB</i>     | 1,733,301 | 1,735,451 | + | 2158 | 2449 | 0.88 | 2837 | 3005 | 0.94 |
| <i>ylxP</i>     | 1,735,448 | 1,735,726 | + | 4356 | 4285 | 1.02 | 3291 | 3150 | 1.04 |
| <i>rbfA</i>     | 1,735,743 | 1,736,096 | + | 527  | 532  | 0.99 | 567  | 533  | 1.06 |
| <i>truB</i>     | 1,736,178 | 1,737,107 | + | 781  | 719  | 1.09 | 665  | 743  | 0.89 |
| <i>ribC</i>     | 1,737,126 | 1,738,076 | + | 1387 | 1214 | 1.14 | 1293 | 1306 | 0.99 |
| <i>rpsO</i>     | 1,738,233 | 1,738,502 | + | 1597 | 2089 | 0.76 | 3644 | 3772 | 0.97 |
| <i>pnpA</i>     | 1,738,675 | 1,740,792 | + | 1823 | 1772 | 1.03 | 2182 | 2394 | 0.91 |
| <i>ylxY</i>     | 1,740,910 | 1,741,869 | + | 167  | 155  | 1.08 | 405  | 435  | 0.93 |
| <i>mlpA</i>     | 1,741,909 | 1,743,138 | + | 240  | 232  | 1.03 | 505  | 524  | 0.96 |
| <i>ymxH</i>     | 1,743,216 | 1,743,473 | + | 37   | 47   | 0.79 | 50   | 48   | 1.03 |
| <i>spoVFA</i>   | 1,743,659 | 1,744,552 | + | 44   | 49   | 0.91 | 34   | 41   | 0.83 |
| <i>spoVFB</i>   | 1,744,555 | 1,745,157 | + | 59   | 62   | 0.95 | 46   | 48   | 0.95 |
| <i>asd</i>      | 1,745,283 | 1,746,323 | + | 2120 | 1960 | 1.08 | 2396 | 2735 | 0.88 |
| <i>dapG</i>     | 1,746,415 | 1,747,629 | + | 1194 | 961  | 1.24 | 1856 | 1743 | 1.07 |
| <i>dapA</i>     | 1,747,660 | 1,748,532 | + | 1838 | 1598 | 1.15 | 2444 | 2226 | 1.10 |
| <i>ymfA</i>     | 1,748,830 | 1,750,377 | + | 1667 | 1436 | 1.16 | 2157 | 2119 | 1.02 |
| <i>tepA</i>     | 1,750,559 | 1,751,230 | + | 77   | 73   | 1.05 | 94   | 98   | 0.96 |
| <i>spoIIIIE</i> | 1,751,569 | 1,753,932 | + | 599  | 539  | 1.11 | 556  | 592  | 0.94 |
| <i>ymfC</i>     | 1,754,075 | 1,754,800 | + | 728  | 848  | 0.86 | 811  | 1069 | 0.76 |
| <i>ymfD</i>     | 1,754,939 | 1,755,313 | + | 89   | 98   | 0.90 | 83   | 111  | 0.75 |
| <i>ymfE</i>     | 1,755,565 | 1,756,149 | + | 55   | 58   | 0.95 | 80   | 83   | 0.97 |
| <i>ymfF</i>     | 1,756,424 | 1,756,756 | + | 894  | 772  | 1.16 | 1078 | 1326 | 0.81 |
| <i>ymfG</i>     | 1,756,821 | 1,757,543 | + | 1061 | 1028 | 1.03 | 1555 | 1624 | 0.96 |
| <i>ymfH</i>     | 1,757,626 | 1,758,873 | + | 847  | 870  | 0.97 | 1297 | 1267 | 1.02 |
| <i>ymfI</i>     | 1,758,928 | 1,759,656 | + | 179  | 181  | 0.99 | 262  | 227  | 1.15 |
| <i>ymfJ</i>     | 1,759,737 | 1,759,994 | + | 100  | 116  | 0.87 | 220  | 176  | 1.25 |
| <i>ymfK</i>     | 1,760,138 | 1,760,638 | + | 742  | 817  | 0.91 | 489  | 602  | 0.81 |
| <i>ymfL</i>     | 1,760,526 | 1,760,912 | + | 1200 | 1323 | 0.91 | 907  | 1189 | 0.76 |
| <i>ymfM</i>     | 1,760,979 | 1,761,620 | + | 813  | 935  | 0.87 | 875  | 977  | 0.90 |
| <i>pgsA</i>     | 1,761,895 | 1,762,476 | + | 317  | 259  | 1.23 | 541  | 521  | 1.04 |
| <i>cinA</i>     | 1,762,494 | 1,763,744 | + | 625  | 511  | 1.22 | 1050 | 951  | 1.10 |
| <i>recA</i>     | 1,763,917 | 1,764,960 | + | 2126 | 1936 | 1.10 | 2366 | 2383 | 0.99 |
| <i>pbpX</i>     | 1,765,128 | 1,766,303 | + | 171  | 164  | 1.04 | 432  | 422  | 1.02 |
| <i>ymdA</i>     | 1,766,580 | 1,768,142 | + | 4080 | 4158 | 0.98 | 3992 | 4063 | 0.98 |
| <i>ymdB</i>     | 1,768,211 | 1,769,005 | + | 511  | 510  | 1.00 | 733  | 804  | 0.91 |
| <i>spoVS</i>    | 1,769,205 | 1,769,465 | + | 1109 | 1138 | 0.97 | 1345 | 1486 | 0.91 |
| <i>tdh</i>      | 1,769,731 | 1,770,774 | + | 112  | 141  | 0.79 | 121  | 149  | 0.81 |
| <i>kbl</i>      | 1,770,787 | 1,771,965 | + | 104  | 135  | 0.77 | 99   | 124  | 0.80 |
| <i>ymcB</i>     | 1,772,113 | 1,773,642 | + | 1436 | 1261 | 1.14 | 1772 | 1712 | 1.04 |
| <i>ymcA</i>     | 1,773,644 | 1,774,075 | + | 799  | 916  | 0.87 | 1204 | 1083 | 1.11 |
| <i>cotE</i>     | 1,774,337 | 1,774,882 | + | 80   | 80   | 1.01 | 83   | 85   | 0.97 |
| <i>mutS</i>     | 1,775,015 | 1,777,591 | + | 319  | 254  | 1.26 | 455  | 520  | 0.88 |
| <i>mutL</i>     | 1,777,607 | 1,779,490 | + | 497  | 439  | 1.13 | 763  | 747  | 1.02 |
| <i>ymzD</i>     | 1,779,888 | 1,780,343 | - | 251  | 306  | 0.82 | 256  | 336  | 0.76 |
| <i>ymcC</i>     | 1,780,498 | 1,781,055 | - | 62   | 67   | 0.93 | 73   | 80   | 0.92 |
| <i>pksA</i>     | 1,781,176 | 1,781,793 | + | 149  | 153  | 0.98 | 181  | 265  | 0.68 |
| <i>pksB</i>     | 1,781,983 | 1,782,660 | + | 333  | 273  | 1.22 | 299  | 293  | 1.02 |
| <i>pksC</i>     | 1,783,033 | 1,783,899 | + | 443  | 455  | 0.98 | 525  | 579  | 0.91 |
| <i>pksD</i>     | 1,784,403 | 1,785,293 | + | 295  | 241  | 1.22 | 309  | 360  | 0.86 |
| <i>pksE</i>     | 1,785,290 | 1,787,593 | + | 387  | 309  | 1.25 | 433  | 512  | 0.84 |
| <i>acpK</i>     | 1,787,654 | 1,787,902 | + | 269  | 216  | 1.25 | 308  | 355  | 0.87 |
| <i>pksF</i>     | 1,787,880 | 1,789,130 | + | 261  | 232  | 1.13 | 319  | 341  | 0.94 |
| <i>pksG</i>     | 1,789,131 | 1,790,393 | + | 213  | 207  | 1.03 | 335  | 368  | 0.91 |
| <i>pksH</i>     | 1,790,381 | 1,791,160 | + | 174  | 174  | 1.00 | 260  | 290  | 0.90 |
| <i>pksI</i>     | 1,791,200 | 1,791,949 | + | 126  | 128  | 0.98 | 211  | 258  | 0.82 |
| <i>pksJ</i>     | 1,791,994 | 1,807,131 | + | 288  | 302  | 0.96 | 362  | 355  | 1.02 |
| <i>pksL</i>     | 1,807,146 | 1,820,731 | + | 459  | 453  | 1.01 | 471  | 438  | 1.08 |
| <i>pksM</i>     | 1,820,747 | 1,833,535 | + | 339  | 336  | 1.01 | 357  | 327  | 1.09 |
| <i>pksN</i>     | 1,833,603 | 1,850,069 | + | 390  | 381  | 1.02 | 451  | 389  | 1.16 |
| <i>pksR</i>     | 1,850,084 | 1,857,715 | + | 478  | 444  | 1.08 | 534  | 448  | 1.19 |
| <i>pksS</i>     | 1,857,854 | 1,858,984 | - | 664  | 539  | 1.23 | 606  | 602  | 1.01 |
| <i>ymzB</i>     | 1,859,209 | 1,859,565 | - | 831  | 578  | 1.44 | 677  | 446  | 1.52 |
| <i>ymaE</i>     | 1,859,644 | 1,860,342 | - | 409  | 391  | 1.05 | 695  | 581  | 1.20 |
| <i>aprX</i>     | 1,860,580 | 1,861,908 | - | 86   | 85   | 1.01 | 74   | 82   | 0.89 |
| <i>ymaC</i>     | 1,862,644 | 1,863,351 | + | 97   | 100  | 0.97 | 111  | 125  | 0.88 |
| <i>ymaD</i>     | 1,863,421 | 1,863,873 | + | 108  | 118  | 0.91 | 221  | 196  | 1.13 |
| <i>ebrB</i>     | 1,863,887 | 1,864,240 | - | 77   | 81   | 0.95 | 63   | 64   | 0.97 |
| <i>ebrA</i>     | 1,864,254 | 1,864,571 | - | 55   | 61   | 0.89 | 56   | 59   | 0.94 |
| <i>ymaG</i>     | 1,864,708 | 1,865,079 | - | 40   | 42   | 0.96 | 38   | 45   | 0.85 |
| <i>ymaF</i>     | 1,865,072 | 1,865,485 | + | 47   | 46   | 1.01 | 42   | 51   | 0.81 |
| <i>miaA</i>     | 1,865,584 | 1,866,528 | + | 349  | 251  | 1.39 | 331  | 297  | 1.11 |
| <i>ymaH</i>     | 1,866,568 | 1,866,789 | + | 461  | 502  | 0.92 | 751  | 959  | 0.78 |
| <i>ymzC</i>     | 1,866,985 | 1,867,257 | + | 251  | 214  | 1.18 | 307  | 318  | 0.96 |
| <i>ymzA</i>     | 1,867,339 | 1,867,569 | + | 440  | 426  | 1.03 | 646  | 651  | 0.99 |
| <i>ymaA</i>     | 1,867,812 | 1,868,204 | + | 463  | 366  | 1.27 | 866  | 1083 | 0.80 |
| <i>nrdE</i>     | 1,868,164 | 1,870,266 | + | 758  | 581  | 1.30 | 1458 | 1602 | 0.91 |
| <i>nrdF</i>     | 1,870,284 | 1,871,273 | + | 677  | 596  | 1.14 | 1313 | 1346 | 0.98 |
| <i>ymaB</i>     | 1,871,323 | 1,871,943 | + | 319  | 295  | 1.08 | 733  | 708  | 1.04 |
| <i>cwlC</i>     | 1,872,007 | 1,872,774 | - | 44   | 50   | 0.88 | 53   | 52   | 1.01 |
| <i>spoVK</i>    | 1,873,398 | 1,874,366 | + | 83   | 84   | 0.99 | 89   | 95   | 0.93 |
| <i>ynbA</i>     | 1,874,587 | 1,875,591 | + | 477  | 394  | 1.21 | 629  | 617  | 1.02 |
| <i>ynbB</i>     | 1,875,779 | 1,877,044 | + | 474  | 329  | 1.44 | 812  | 673  | 1.21 |
| <i>glnR</i>     | 1,877,155 | 1,877,562 | + | 1561 | 1783 | 0.88 | 1153 | 1151 | 1.00 |

AbrB regulon  
AbrB regulon

|              |           |           |   |      |      |      |      |      |      |               |
|--------------|-----------|-----------|---|------|------|------|------|------|------|---------------|
| <i>glnA</i>  | 1,877,623 | 1,878,957 | + | 4131 | 4792 | 0.86 | 4124 | 4291 | 0.96 |               |
| <i>ynxB</i>  | 1,879,285 | 1,879,575 | + | 126  | 142  | 0.89 | 120  | 111  | 1.08 |               |
| <i>ynzF</i>  | 1,879,821 | 1,880,165 | + | 413  | 367  | 1.12 | 414  | 365  | 1.14 |               |
| <i>ynzG</i>  | 1,880,296 | 1,880,547 | + | 72   | 65   | 1.12 | 60   | 59   | 1.02 |               |
| <i>ynaB</i>  | 1,880,867 | 1,881,178 | + | 520  | 405  | 1.28 | 627  | 495  | 1.27 |               |
| <i>ynaC</i>  | 1,881,248 | 1,882,039 | + | 338  | 275  | 1.23 | 464  | 392  | 1.18 |               |
| <i>ynaD</i>  | 1,882,374 | 1,882,886 | + | 40   | 43   | 0.93 | 69   | 75   | 0.92 |               |
| <i>ynaE</i>  | 1,883,446 | 1,884,087 | + | 140  | 143  | 0.98 | 151  | 190  | 0.79 |               |
| <i>ynaF</i>  | 1,884,176 | 1,884,529 | + | 101  | 99   | 1.03 | 100  | 131  | 0.77 |               |
| <i>ynaG</i>  | 1,884,573 | 1,884,848 | + | 117  | 105  | 1.12 | 132  | 141  | 0.94 |               |
| <i>ynaI</i>  | 1,885,265 | 1,885,735 | + | 48   | 46   | 1.05 | 56   | 63   | 0.88 |               |
| <i>xynP</i>  | 1,886,560 | 1,887,951 | + | 35   | 45   | 0.78 | 38   | 42   | 0.91 |               |
| <i>xynB</i>  | 1,887,982 | 1,889,583 | + | 58   | 58   | 1.01 | 57   | 61   | 0.95 |               |
| <i>xylR</i>  | 1,889,720 | 1,890,772 | - | 168  | 156  | 1.08 | 184  | 183  | 1.00 |               |
| <i>xylA</i>  | 1,891,116 | 1,892,453 | + | 83   | 143  | 0.58 | 85   | 105  | 0.81 |               |
| <i>xylB</i>  | 1,892,604 | 1,894,103 | + | 84   | 93   | 0.90 | 86   | 91   | 0.95 |               |
| <i>yncB</i>  | 1,894,586 | 1,895,221 | - | 121  | 123  | 0.98 | 168  | 159  | 1.06 |               |
| <i>yncC</i>  | 1,895,632 | 1,896,891 | + | 54   | 69   | 0.78 | 52   | 62   | 0.85 |               |
| <i>yncD</i>  | 1,897,149 | 1,898,333 | - | 67   | 77   | 0.88 | 60   | 74   | 0.81 |               |
| <i>yncE</i>  | 1,898,797 | 1,899,258 | + | 90   | 88   | 1.02 | 138  | 129  | 1.07 |               |
| <i>yncF</i>  | 1,899,288 | 1,899,722 | + | 184  | 171  | 1.08 | 262  | 285  | 0.92 |               |
| <i>ynzH</i>  | 1,900,326 | 1,900,586 | - | 28   | 35   | 0.80 | 34   | 38   | 0.92 |               |
| <i>thyA</i>  | 1,901,428 | 1,902,267 | + | 139  | 130  | 1.07 | 191  | 208  | 0.92 |               |
| <i>yncM</i>  | 1,902,720 | 1,903,472 | - | 1302 | 1444 | 0.90 | 1213 | 1276 | 0.95 | AbrB regulon  |
| <i>cotC</i>  | 1,904,204 | 1,904,560 | - | 32   | 36   | 0.88 | 44   | 48   | 0.92 |               |
| <i>tatAC</i> | 1,904,579 | 1,904,767 | - | 311  | 328  | 0.95 | 282  | 291  | 0.97 |               |
| <i>yndA</i>  | 1,905,018 | 1,905,416 | + | 31   | 37   | 0.85 | 37   | 40   | 0.93 |               |
| <i>yndB</i>  | 1,905,481 | 1,905,915 | - | 394  | 407  | 0.97 | 485  | 569  | 0.85 |               |
| <i>ynzB</i>  | 1,906,222 | 1,906,410 | + | 53   | 56   | 0.93 | 76   | 86   | 0.89 |               |
| <i>yndD</i>  | 1,906,703 | 1,908,265 | + | 64   | 58   | 1.11 | 44   | 47   | 0.93 |               |
| <i>yndE</i>  | 1,908,295 | 1,909,386 | + | 56   | 50   | 1.11 | 44   | 46   | 0.95 |               |
| <i>yndF</i>  | 1,909,376 | 1,910,590 | + | 97   | 100  | 0.97 | 87   | 95   | 0.91 |               |
| <i>yndG</i>  | 1,910,737 | 1,911,543 | + | 209  | 160  | 1.31 | 337  | 283  | 1.19 |               |
| <i>yndH</i>  | 1,911,548 | 1,912,165 | + | 198  | 143  | 1.39 | 269  | 243  | 1.11 |               |
| <i>yndJ</i>  | 1,912,162 | 1,913,802 | + | 190  | 138  | 1.38 | 323  | 266  | 1.22 |               |
| <i>yndK</i>  | 1,913,839 | 1,914,204 | + | 212  | 154  | 1.37 | 324  | 286  | 1.13 |               |
| <i>yndL</i>  | 1,914,430 | 1,915,188 | + | 56   | 65   | 0.87 | 46   | 64   | 0.72 |               |
| <i>yndM</i>  | 1,915,215 | 1,915,754 | - | 26   | 31   | 0.83 | 31   | 31   | 1.01 |               |
| <i>yndN</i>  | 1,915,872 | 1,916,306 | + | 554  | 469  | 1.18 | 774  | 617  | 1.25 |               |
| <i>lexA</i>  | 1,916,848 | 1,917,465 | - | 1196 | 1285 | 0.93 | 885  | 1206 | 0.73 |               |
| <i>yneA</i>  | 1,917,615 | 1,917,932 | + | 201  | 117  | 1.72 | 187  | 147  | 1.27 |               |
| <i>yneB</i>  | 1,917,951 | 1,918,604 | + | 233  | 159  | 1.47 | 329  | 275  | 1.20 |               |
| <i>ynzC</i>  | 1,918,668 | 1,918,901 | + | 105  | 109  | 0.96 | 152  | 202  | 0.75 |               |
| <i>tkf</i>   | 1,919,070 | 1,921,073 | + | 1791 | 1747 | 1.02 | 2316 | 2302 | 1.01 | Spo0A regulon |
| <i>yneE</i>  | 1,921,226 | 1,921,672 | + | 65   | 82   | 0.80 | 77   | 85   | 0.91 | Spo0A regulon |
| <i>yneF</i>  | 1,921,758 | 1,921,976 | + | 598  | 646  | 0.93 | 1716 | 1689 | 1.02 |               |
| <i>ynzD</i>  | 1,922,050 | 1,922,223 | - | 136  | 123  | 1.11 | 262  | 307  | 0.86 | AbrB regulon  |
| <i>ccdA</i>  | 1,922,443 | 1,923,150 | + | 212  | 176  | 1.20 | 245  | 237  | 1.03 |               |
| <i>yneI</i>  | 1,923,239 | 1,923,601 | + | 551  | 462  | 1.19 | 689  | 704  | 0.98 |               |
| <i>yneJ</i>  | 1,923,680 | 1,924,171 | + | 357  | 396  | 0.90 | 497  | 558  | 0.89 |               |
| <i>yneK</i>  | 1,924,202 | 1,924,630 | + | 527  | 406  | 1.30 | 458  | 440  | 1.04 |               |
| <i>cotM</i>  | 1,924,864 | 1,925,256 | - | 23   | 28   | 0.82 | 32   | 37   | 0.87 |               |
| <i>citB</i>  | 1,925,889 | 1,928,618 | + | 2897 | 3674 | 0.79 | 3727 | 4119 | 0.90 |               |
| <i>yneN</i>  | 1,928,690 | 1,929,202 | + | 360  | 550  | 0.65 | 745  | 1082 | 0.69 |               |
| <i>tlp</i>   | 1,929,656 | 1,929,907 | + | 225  | 167  | 1.35 | 217  | 109  | 2.00 |               |
| <i>yneP</i>  | 1,930,043 | 1,930,408 | + | 118  | 93   | 1.26 | 123  | 122  | 1.01 |               |
| <i>yneQ</i>  | 1,930,424 | 1,930,723 | + | 143  | 136  | 1.05 | 256  | 237  | 1.08 |               |
| <i>yneR</i>  | 1,930,754 | 1,931,041 | - | 254  | 266  | 0.95 | 542  | 462  | 1.17 |               |
| <i>yneS</i>  | 1,931,129 | 1,931,710 | - | 445  | 427  | 1.04 | 453  | 559  | 0.81 |               |
| <i>yneT</i>  | 1,931,880 | 1,932,287 | + | 612  | 702  | 0.87 | 748  | 856  | 0.87 |               |
| <i>parE</i>  | 1,932,686 | 1,934,653 | + | 471  | 359  | 1.31 | 840  | 769  | 1.09 |               |
| <i>parC</i>  | 1,934,657 | 1,937,077 | + | 697  | 558  | 1.25 | 1227 | 1041 | 1.18 |               |
| <i>ynfC</i>  | 1,937,275 | 1,937,685 | - | 1634 | 1942 | 0.84 | 704  | 584  | 1.20 |               |
| <i>alsT</i>  | 1,938,134 | 1,939,531 | + | 322  | 333  | 0.97 | 508  | 670  | 0.76 |               |
| <i>bgIC</i>  | 1,939,834 | 1,941,333 | + | 176  | 170  | 1.04 | 160  | 154  | 1.04 |               |
| <i>ynfE</i>  | 1,941,401 | 1,941,664 | + | 31   | 32   | 0.96 | 32   | 34   | 0.94 |               |
| <i>ynfF</i>  | 1,941,923 | 1,943,191 | - | 349  | 251  | 1.39 | 383  | 298  | 1.29 | AbrB regulon  |
| <i>xynD</i>  | 1,943,322 | 1,944,863 | - | 252  | 180  | 1.40 | 312  | 265  | 1.18 | AbrB regulon  |
| <i>yngA</i>  | 1,945,458 | 1,945,904 | + | 48   | 43   | 1.13 | 37   | 38   | 0.98 |               |
| <i>yngB</i>  | 1,945,911 | 1,946,804 | + | 349  | 268  | 1.30 | 322  | 329  | 0.98 |               |
| <i>yngC</i>  | 1,946,877 | 1,947,473 | + | 569  | 420  | 1.36 | 839  | 634  | 1.32 |               |
| <i>yngD</i>  | 1,947,522 | 1,948,721 | - | 63   | 67   | 0.95 | 59   | 62   | 0.95 |               |
| <i>yngE</i>  | 1,948,891 | 1,950,678 | - | 81   | 80   | 1.02 | 67   | 76   | 0.88 |               |
| <i>yngF</i>  | 1,950,437 | 1,951,219 | - | 57   | 58   | 0.98 | 46   | 48   | 0.95 |               |
| <i>yngG</i>  | 1,951,240 | 1,952,139 | - | 64   | 60   | 1.06 | 44   | 60   | 0.74 |               |
| <i>yngH</i>  | 1,952,390 | 1,953,724 | - | 76   | 81   | 0.95 | 60   | 72   | 0.83 |               |
| <i>yngI</i>  | 1,953,734 | 1,955,383 | - | 69   | 70   | 0.99 | 49   | 58   | 0.85 |               |
| <i>yngJ</i>  | 1,955,427 | 1,956,569 | - | 83   | 81   | 1.02 | 55   | 65   | 0.85 |               |
| <i>ynzE</i>  | 1,956,660 | 1,956,965 | - | 25   | 35   | 0.72 | 25   | 30   | 0.84 |               |
| <i>yngK</i>  | 1,957,236 | 1,958,768 | - | 72   | 78   | 0.92 | 54   | 76   | 0.71 |               |
| <i>yngL</i>  | 1,958,904 | 1,959,296 | - | 45   | 51   | 0.89 | 39   | 51   | 0.75 |               |
| <i>ppsE</i>  | 1,959,407 | 1,963,246 | - | 376  | 406  | 0.93 | 408  | 419  | 0.97 | AbrB regulon  |
| <i>ppsD</i>  | 1,963,254 | 1,974,065 | - | 459  | 495  | 0.93 | 462  | 472  | 0.98 | AbrB regulon  |
| <i>ppsC</i>  | 1,974,090 | 1,981,757 | - | 490  | 534  | 0.92 | 494  | 519  | 0.95 | AbrB regulon  |
| <i>ppsB</i>  | 1,981,774 | 1,989,456 | - | 272  | 305  | 0.89 | 329  | 366  | 0.90 | AbrB regulon  |
| <i>ppsA</i>  | 1,989,481 | 1,997,166 | - | 417  | 437  | 0.95 | 389  | 432  | 0.90 | AbrB regulon  |
| <i>dacC</i>  | 1,997,549 | 1,999,024 | - | 356  | 359  | 0.99 | 429  | 444  | 0.97 | AbrB regulon  |
| <i>yoxA</i>  | 1,999,058 | 2,000,035 | - | 286  | 304  | 0.94 | 360  | 378  | 0.95 |               |
| <i>yoeA</i>  | 2,000,169 | 2,001,560 | - | 427  | 410  | 1.04 | 590  | 487  | 1.21 |               |
| <i>yoeB</i>  | 2,001,846 | 2,002,391 | + | 3963 | 5630 | 0.70 | 1747 | 1508 | 1.16 |               |
| <i>yoeC</i>  | 2,002,869 | 2,003,156 | - | 105  | 75   | 1.40 | 92   | 119  | 0.77 |               |



|             |           |           |   |      |      |      |      |      |      |               |
|-------------|-----------|-----------|---|------|------|------|------|------|------|---------------|
| <i>yoeD</i> | 2,003,472 | 2,003,702 | - | 77   | 73   | 1.07 | 102  | 105  | 0.97 |               |
| <i>ggt</i>  | 2,003,887 | 2,005,650 | + | 95   | 107  | 0.89 | 81   | 93   | 0.87 |               |
| <i>yofA</i> | 2,005,751 | 2,006,608 | - | 112  | 84   | 1.32 | 165  | 172  | 0.96 |               |
| <i>yogA</i> | 2,006,736 | 2,007,725 | + | 78   | 77   | 1.02 | 86   | 92   | 0.94 |               |
| <i>glbB</i> | 2,007,782 | 2,009,263 | - | 3245 | 3740 | 0.87 | 3852 | 3813 | 1.01 |               |
| <i>glfA</i> | 2,009,280 | 2,013,842 | - | 1961 | 2176 | 0.90 | 2819 | 2961 | 0.95 |               |
| <i>glfC</i> | 2,013,989 | 2,014,891 | + | 268  | 257  | 1.04 | 202  | 274  | 0.74 |               |
| <i>proJ</i> | 2,014,943 | 2,016,058 | - | 299  | 159  | 1.88 | 857  | 687  | 1.25 |               |
| <i>proH</i> | 2,016,055 | 2,016,948 | - | 419  | 230  | 1.82 | 1126 | 915  | 1.23 |               |
| <i>rtf</i>  | 2,017,095 | 2,017,463 | - | 79   | 97   | 0.82 | 117  | 119  | 0.98 |               |
| <i>yoxD</i> | 2,017,763 | 2,018,479 | - | 587  | 596  | 0.98 | 1227 | 1262 | 0.97 |               |
| <i>yoxC</i> | 2,018,630 | 2,018,935 | + | 3941 | 3113 | 1.27 | 2016 | 987  | 2.04 |               |
| <i>yoxB</i> | 2,019,006 | 2,019,776 | + | 1771 | 1166 | 1.52 | 458  | 206  | 2.23 |               |
| <i>yoaA</i> | 2,019,820 | 2,020,317 | + | 1137 | 684  | 1.66 | 332  | 176  | 1.89 |               |
| <i>yoaB</i> | 2,020,433 | 2,021,677 | - | 181  | 244  | 0.74 | 375  | 442  | 0.85 |               |
| <i>yoaC</i> | 2,021,771 | 2,023,234 | - | 169  | 216  | 0.78 | 532  | 628  | 0.85 |               |
| <i>yoaD</i> | 2,023,252 | 2,024,286 | - | 101  | 112  | 0.90 | 263  | 321  | 0.82 |               |
| <i>yoaE</i> | 2,024,610 | 2,026,643 | + | 330  | 341  | 0.97 | 633  | 675  | 0.94 |               |
| <i>yoaF</i> | 2,026,720 | 2,027,013 | + | 431  | 382  | 1.13 | 631  | 875  | 0.72 |               |
| <i>yoaG</i> | 2,027,386 | 2,027,790 | - | 163  | 155  | 1.05 | 386  | 447  | 0.86 |               |
| <i>yozQ</i> | 2,028,231 | 2,028,524 | + | 87   | 93   | 0.93 | 120  | 125  | 0.96 |               |
| <i>yoaH</i> | 2,028,640 | 2,030,244 | - | 636  | 747  | 0.85 | 509  | 473  | 1.08 | SigD regulon  |
| <i>yoaI</i> | 2,030,972 | 2,032,099 | + | 62   | 52   | 1.19 | 40   | 40   | 1.00 |               |
| <i>yoaJ</i> | 2,032,136 | 2,032,834 | - | 201  | 236  | 0.85 | 179  | 196  | 0.91 |               |
| <i>yoaK</i> | 2,033,104 | 2,033,781 | - | 72   | 73   | 0.98 | 98   | 98   | 1.00 |               |
| <i>pelB</i> | 2,033,954 | 2,034,991 | + | 53   | 54   | 0.99 | 57   | 54   | 1.04 |               |
| <i>yoaM</i> | 2,035,248 | 2,035,931 | + | 35   | 45   | 0.78 | 38   | 46   | 0.82 |               |
| <i>yoaN</i> | 2,036,810 | 2,037,988 | - | 46   | 53   | 0.87 | 46   | 50   | 0.91 |               |
| <i>yoaO</i> | 2,038,111 | 2,038,599 | - | 132  | 112  | 1.18 | 210  | 175  | 1.20 |               |
| <i>yoaP</i> | 2,038,819 | 2,039,574 | - | 62   | 59   | 1.05 | 59   | 56   | 1.05 |               |
| <i>yoaQ</i> | 2,039,882 | 2,040,238 | + | 33   | 35   | 0.95 | 33   | 35   | 0.93 |               |
| <i>yozF</i> | 2,040,786 | 2,041,037 | - | 49   | 43   | 1.15 | 41   | 39   | 1.06 |               |
| <i>yoaR</i> | 2,041,138 | 2,042,049 | - | 51   | 53   | 0.96 | 37   | 43   | 0.85 |               |
| <i>yoaS</i> | 2,042,396 | 2,042,878 | + | 157  | 180  | 0.88 | 105  | 109  | 0.96 |               |
| <i>yozG</i> | 2,042,888 | 2,043,142 | + | 297  | 326  | 0.91 | 248  | 260  | 0.95 |               |
| <i>yoaT</i> | 2,043,248 | 2,044,042 | + | 126  | 148  | 0.85 | 136  | 134  | 1.01 |               |
| <i>yoaU</i> | 2,044,166 | 2,045,038 | - | 64   | 62   | 1.04 | 60   | 70   | 0.85 |               |
| <i>yoaV</i> | 2,045,139 | 2,046,017 | + | 45   | 51   | 0.89 | 48   | 53   | 0.91 |               |
| <i>yoaW</i> | 2,046,190 | 2,046,621 | - | 64   | 40   | 1.63 | 69   | 48   | 1.45 |               |
| <i>yoaZ</i> | 2,046,885 | 2,047,517 | - | 49   | 51   | 0.97 | 63   | 62   | 1.02 |               |
| <i>penP</i> | 2,047,743 | 2,048,663 | + | 464  | 455  | 1.02 | 652  | 615  | 1.06 |               |
| <i>yobA</i> | 2,049,160 | 2,049,522 | - | 65   | 74   | 0.88 | 105  | 94   | 1.11 |               |
| <i>yobB</i> | 2,049,899 | 2,050,162 | + | 99   | 118  | 0.83 | 115  | 139  | 0.83 | AbrB regulon  |
| <i>pps</i>  | 2,050,539 | 2,053,139 | - | 129  | 143  | 0.90 | 215  | 214  | 1.01 |               |
| <i>xynA</i> | 2,053,809 | 2,054,450 | - | 1535 | 1399 | 1.10 | 1597 | 1456 | 1.10 |               |
| <i>yobD</i> | 2,055,488 | 2,055,826 | + | 61   | 73   | 0.84 | 106  | 177  | 0.60 |               |
| <i>yozH</i> | 2,055,860 | 2,056,180 | - | 23   | 22   | 1.05 | 20   | 20   | 1.03 |               |
| <i>yozI</i> | 2,056,425 | 2,056,790 | + | 54   | 71   | 0.76 | 98   | 153  | 0.64 |               |
| <i>yobE</i> | 2,057,012 | 2,057,671 | + | 114  | 146  | 0.78 | 117  | 134  | 0.87 |               |
| <i>yobF</i> | 2,057,926 | 2,058,849 | - | 177  | 175  | 1.01 | 173  | 190  | 0.91 |               |
| <i>yozJ</i> | 2,059,448 | 2,059,903 | - | 42   | 37   | 1.11 | 55   | 67   | 0.83 |               |
| <i>rapK</i> | 2,061,361 | 2,062,476 | + | 495  | 434  | 1.14 | 751  | 864  | 0.87 | AbrB regulon  |
| <i>yobH</i> | 2,062,721 | 2,063,332 | - | 54   | 56   | 0.97 | 49   | 51   | 0.96 |               |
| <i>yozK</i> | 2,063,411 | 2,063,758 | - | 23   | 25   | 0.90 | 24   | 27   | 0.89 |               |
| <i>yozL</i> | 2,063,751 | 2,064,044 | - | 16   | 24   | 0.64 | 19   | 19   | 0.96 |               |
| <i>yozM</i> | 2,064,253 | 2,064,588 | + | 117  | 143  | 0.82 | 136  | 152  | 0.90 |               |
| <i>yobI</i> | 2,064,635 | 2,068,240 | - | 600  | 374  | 1.61 | 574  | 589  | 0.97 |               |
| <i>yobJ</i> | 2,069,455 | 2,070,297 | - | 361  | 270  | 1.33 | 874  | 1103 | 0.79 |               |
| <i>yobK</i> | 2,070,497 | 2,070,955 | - | 216  | 173  | 1.24 | 394  | 409  | 0.96 |               |
| <i>yobL</i> | 2,070,965 | 2,072,767 | - | 312  | 288  | 1.09 | 429  | 565  | 0.76 |               |
| <i>yobM</i> | 2,072,869 | 2,073,357 | - | 421  | 382  | 1.10 | 580  | 517  | 1.12 |               |
| <i>yobN</i> | 2,073,650 | 2,074,990 | + | 38   | 41   | 0.91 | 31   | 37   | 0.86 |               |
| <i>yobO</i> | 2,075,417 | 2,077,837 | + | 178  | 186  | 0.96 | 171  | 151  | 1.14 | AbrB regulon  |
| <i>csaA</i> | 2,078,425 | 2,078,757 | - | 267  | 341  | 0.78 | 434  | 607  | 0.71 |               |
| <i>yobQ</i> | 2,078,822 | 2,079,547 | - | 167  | 197  | 0.85 | 354  | 527  | 0.67 |               |
| <i>yobR</i> | 2,079,562 | 2,080,305 | - | 210  | 240  | 0.87 | 346  | 495  | 0.70 |               |
| <i>yobS</i> | 2,080,383 | 2,080,958 | - | 60   | 66   | 0.91 | 102  | 120  | 0.85 |               |
| <i>yobT</i> | 2,080,964 | 2,081,665 | - | 97   | 95   | 1.02 | 118  | 141  | 0.83 |               |
| <i>yobU</i> | 2,081,742 | 2,082,224 | - | 82   | 80   | 1.02 | 68   | 72   | 0.94 |               |
| <i>yobV</i> | 2,082,278 | 2,083,219 | - | 94   | 105  | 0.90 | 130  | 132  | 0.98 |               |
| <i>yobW</i> | 2,083,425 | 2,083,970 | + | 36   | 44   | 0.82 | 36   | 39   | 0.92 |               |
| <i>yozA</i> | 2,083,997 | 2,084,320 | - | 332  | 359  | 0.92 | 343  | 353  | 0.97 |               |
| <i>yocA</i> | 2,084,514 | 2,085,191 | + | 776  | 531  | 1.46 | 1456 | 1323 | 1.10 |               |
| <i>yozB</i> | 2,085,281 | 2,085,817 | - | 1098 | 820  | 1.34 | 701  | 644  | 1.09 |               |
| <i>yocB</i> | 2,085,954 | 2,086,736 | - | 3620 | 2079 | 1.74 | 2011 | 733  | 2.74 |               |
| <i>yocC</i> | 2,086,907 | 2,087,404 | + | 74   | 74   | 1.01 | 134  | 110  | 1.22 |               |
| <i>yocD</i> | 2,087,468 | 2,088,445 | + | 318  | 338  | 0.94 | 490  | 515  | 0.95 | AbrB regulon  |
| <i>des</i>  | 2,088,607 | 2,089,665 | + | 321  | 384  | 0.83 | 296  | 377  | 0.78 |               |
| <i>yocF</i> | 2,089,785 | 2,090,897 | + | 179  | 156  | 1.15 | 145  | 130  | 1.11 |               |
| <i>yocG</i> | 2,090,916 | 2,091,515 | + | 236  | 195  | 1.21 | 218  | 194  | 1.13 |               |
| <i>yocH</i> | 2,092,110 | 2,092,973 | - | 2335 | 1673 | 1.40 | 3901 | 3488 | 1.12 | Spo0A regulon |
| <i>yocI</i> | 2,093,221 | 2,094,996 | - | 217  | 199  | 1.09 | 310  | 324  | 0.96 |               |
| <i>yocJ</i> | 2,095,561 | 2,096,187 | - | 784  | 800  | 0.98 | 806  | 777  | 1.04 |               |
| <i>yocK</i> | 2,096,338 | 2,096,967 | - | 2890 | 2564 | 1.13 | 1219 | 676  | 1.80 |               |
| <i>yocL</i> | 2,096,904 | 2,097,236 | - | 129  | 93   | 1.38 | 268  | 324  | 0.83 |               |
| <i>yocM</i> | 2,097,528 | 2,098,004 | - | 98   | 72   | 1.35 | 141  | 181  | 0.78 |               |
| <i>yozN</i> | 2,098,071 | 2,098,334 | + | 53   | 54   | 0.98 | 46   | 47   | 0.98 |               |
| <i>yocN</i> | 2,098,339 | 2,098,572 | + | 45   | 39   | 1.15 | 49   | 42   | 1.17 |               |
| <i>yozO</i> | 2,098,658 | 2,099,002 | - | 453  | 364  | 1.25 | 610  | 788  | 0.77 |               |
| <i>yozC</i> | 2,099,359 | 2,099,562 | - | 399  | 320  | 1.25 | 451  | 451  | 1.00 |               |
| <i>dhaS</i> | 2,099,792 | 2,101,279 | + | 911  | 1422 | 0.64 | 783  | 1110 | 0.71 |               |

|             |           |           |   |      |      |      |      |      |      |
|-------------|-----------|-----------|---|------|------|------|------|------|------|
| <i>sqhC</i> | 2,101,380 | 2,103,278 | + | 68   | 74   | 0.92 | 61   | 75   | 0.82 |
| <i>sodF</i> | 2,103,268 | 2,104,113 | + | 92   | 98   | 0.94 | 81   | 94   | 0.86 |
| <i>yocR</i> | 2,104,146 | 2,105,483 | - | 287  | 309  | 0.93 | 354  | 409  | 0.87 |
| <i>yocS</i> | 2,105,702 | 2,106,667 | + | 479  | 607  | 0.79 | 523  | 521  | 1.00 |
| <i>odhB</i> | 2,106,717 | 2,107,970 | - | 4013 | 4814 | 0.83 | 4439 | 4785 | 0.93 |
| <i>odhA</i> | 2,107,986 | 2,110,811 | - | 3085 | 3750 | 0.82 | 3623 | 3989 | 0.91 |
| <i>yojO</i> | 2,111,039 | 2,113,024 | - | 313  | 250  | 1.25 | 620  | 608  | 1.02 |
| <i>yojN</i> | 2,112,966 | 2,113,880 | - | 259  | 218  | 1.19 | 426  | 454  | 0.94 |
| <i>yojM</i> | 2,113,944 | 2,114,534 | - | 292  | 315  | 0.93 | 418  | 528  | 0.79 |
| <i>yojL</i> | 2,114,627 | 2,115,871 | - | 1157 | 1358 | 0.85 | 1574 | 2013 | 0.78 |
| <i>yojK</i> | 2,116,253 | 2,117,470 | - | 179  | 162  | 1.10 | 279  | 267  | 1.05 |
| <i>yojJ</i> | 2,117,706 | 2,118,329 | - | 131  | 105  | 1.25 | 75   | 51   | 1.48 |
| <i>yojI</i> | 2,118,594 | 2,119,952 | + | 116  | 108  | 1.07 | 203  | 198  | 1.03 |
| <i>yojH</i> | 2,119,968 | 2,120,816 | + | 216  | 190  | 1.14 | 335  | 315  | 1.06 |
| <i>yojG</i> | 2,120,842 | 2,121,270 | - | 946  | 823  | 1.15 | 1570 | 1322 | 1.19 |
| <i>yojF</i> | 2,121,524 | 2,121,874 | - | 926  | 762  | 1.22 | 1223 | 1133 | 1.08 |
| <i>yojE</i> | 2,122,225 | 2,123,121 | - | 184  | 205  | 0.89 | 147  | 190  | 0.77 |
| <i>yozR</i> | 2,123,220 | 2,123,693 | + | 45   | 54   | 0.84 | 37   | 45   | 0.83 |
| <i>yojC</i> | 2,123,586 | 2,123,819 | - | 24   | 27   | 0.90 | 26   | 28   | 0.92 |
| <i>yojB</i> | 2,123,728 | 2,123,964 | - | 44   | 50   | 0.88 | 43   | 52   | 0.83 |
| <i>yojA</i> | 2,124,049 | 2,125,383 | - | 102  | 108  | 0.94 | 86   | 98   | 0.88 |
| <i>yodA</i> | 2,125,748 | 2,126,137 | + | 74   | 75   | 0.99 | 85   | 98   | 0.87 |
| <i>yodB</i> | 2,126,544 | 2,126,882 | - | 234  | 238  | 0.98 | 170  | 233  | 0.73 |
| <i>yodC</i> | 2,127,012 | 2,127,620 | + | 938  | 1132 | 0.83 | 1018 | 1132 | 0.90 |
| <i>yodD</i> | 2,127,663 | 2,128,265 | - | 146  | 196  | 0.74 | 114  | 176  | 0.65 |
| <i>yodE</i> | 2,128,281 | 2,129,192 | - | 181  | 215  | 0.84 | 188  | 286  | 0.66 |
| <i>yodF</i> | 2,129,576 | 2,131,066 | + | 721  | 796  | 0.90 | 1183 | 1278 | 0.93 |
| <i>ctpA</i> | 2,131,101 | 2,132,501 | - | 1405 | 1269 | 1.11 | 1917 | 1887 | 1.02 |
| <i>yodH</i> | 2,132,654 | 2,133,355 | + | 57   | 57   | 1.01 | 60   | 57   | 1.06 |
| <i>yodI</i> | 2,133,443 | 2,133,694 | + | 85   | 95   | 0.90 | 89   | 92   | 0.97 |
| <i>yodJ</i> | 2,133,765 | 2,134,586 | - | 543  | 443  | 1.22 | 932  | 786  | 1.18 |
| <i>deoD</i> | 2,134,669 | 2,135,370 | - | 740  | 752  | 0.98 | 1172 | 1192 | 0.98 |
| <i>yodL</i> | 2,135,737 | 2,136,054 | - | 234  | 183  | 1.28 | 260  | 219  | 1.19 |
| <i>yodM</i> | 2,136,112 | 2,136,723 | - | 162  | 105  | 1.54 | 180  | 133  | 1.35 |
| <i>yozD</i> | 2,136,801 | 2,136,977 | - | 66   | 61   | 1.08 | 57   | 55   | 1.04 |
| <i>yodN</i> | 2,137,236 | 2,137,916 | - | 53   | 58   | 0.91 | 53   | 54   | 0.97 |
| <i>yozE</i> | 2,138,067 | 2,138,291 | - | 241  | 243  | 0.99 | 380  | 290  | 1.31 |
| <i>kamA</i> | 2,138,652 | 2,140,067 | - | 55   | 59   | 0.93 | 46   | 53   | 0.88 |
| <i>yodP</i> | 2,140,096 | 2,140,923 | - | 53   | 53   | 0.99 | 53   | 53   | 0.99 |
| <i>yodQ</i> | 2,140,901 | 2,142,211 | - | 60   | 61   | 0.99 | 48   | 58   | 0.83 |
| <i>yodR</i> | 2,142,220 | 2,142,873 | - | 106  | 97   | 1.09 | 111  | 144  | 0.77 |
| <i>yodS</i> | 2,142,858 | 2,143,547 | - | 57   | 61   | 0.94 | 45   | 57   | 0.79 |
| <i>yodT</i> | 2,143,554 | 2,144,888 | - | 73   | 78   | 0.94 | 58   | 73   | 0.80 |
| <i>cgeE</i> | 2,145,211 | 2,145,990 | - | 542  | 507  | 1.07 | 305  | 345  | 0.89 |
| <i>cgeD</i> | 2,146,019 | 2,147,299 | - | 276  | 295  | 0.94 | 172  | 193  | 0.89 |
| <i>cgeC</i> | 2,147,364 | 2,147,669 | - | 22   | 26   | 0.84 | 25   | 25   | 0.99 |
| <i>cgeA</i> | 2,147,874 | 2,148,275 | + | 26   | 52   | 0.51 | 29   | 34   | 0.85 |
| <i>cgeB</i> | 2,148,282 | 2,149,235 | + | 82   | 99   | 0.84 | 71   | 87   | 0.82 |
| <i>phy</i>  | 2,149,306 | 2,150,454 | - | 71   | 63   | 1.13 | 70   | 64   | 1.08 |
| <i>yodU</i> | 2,150,824 | 2,151,249 | + | 64   | 72   | 0.89 | 71   | 78   | 0.90 |
| <i>yotN</i> | 2,151,284 | 2,151,460 | - | 26   | 30   | 0.88 | 30   | 22   | 1.39 |
| <i>yotM</i> | 2,151,463 | 2,152,050 | - | 64   | 36   | 1.77 | 77   | 40   | 1.95 |
| <i>yotL</i> | 2,152,125 | 2,152,367 | + | 39   | 54   | 0.72 | 64   | 58   | 1.11 |
| <i>yotK</i> | 2,152,369 | 2,152,554 | - | 66   | 43   | 1.53 | 103  | 42   | 2.45 |
| <i>yotJ</i> | 2,152,638 | 2,152,850 | - | 35   | 22   | 1.62 | 51   | 22   | 2.32 |
| <i>yotI</i> | 2,152,916 | 2,153,278 | - | 51   | 33   | 1.55 | 75   | 37   | 2.00 |
| <i>yotH</i> | 2,153,275 | 2,153,448 | - | 69   | 57   | 1.20 | 79   | 57   | 1.40 |
| <i>yotG</i> | 2,153,464 | 2,153,781 | - | 45   | 33   | 1.36 | 51   | 31   | 1.66 |
| <i>yotC</i> | 2,154,256 | 2,154,447 | - | 61   | 45   | 1.36 | 63   | 41   | 1.52 |
| <i>yotB</i> | 2,154,491 | 2,155,318 | - | 70   | 45   | 1.55 | 80   | 42   | 1.89 |
| <i>sspC</i> | 2,155,437 | 2,155,655 | + | 35   | 45   | 0.79 | 40   | 46   | 0.87 |
| <i>yosX</i> | 2,155,955 | 2,156,308 | - | 92   | 53   | 1.74 | 125  | 60   | 2.08 |
| <i>yosW</i> | 2,156,539 | 2,156,880 | - | 56   | 40   | 1.39 | 63   | 46   | 1.38 |
| <i>yosV</i> | 2,157,027 | 2,157,317 | - | 47   | 34   | 1.40 | 63   | 34   | 1.86 |
| <i>yosU</i> | 2,157,637 | 2,157,882 | + | 30   | 31   | 0.97 | 41   | 38   | 1.09 |
| <i>yosT</i> | 2,157,922 | 2,158,371 | - | 164  | 119  | 1.37 | 177  | 123  | 1.44 |
| <i>yosS</i> | 2,158,466 | 2,158,894 | - | 140  | 75   | 1.86 | 140  | 72   | 1.95 |
| <i>yosR</i> | 2,158,940 | 2,159,182 | - | 93   | 51   | 1.81 | 118  | 48   | 2.48 |
| <i>yosP</i> | 2,159,182 | 2,160,976 | - | 269  | 190  | 1.41 | 442  | 344  | 1.28 |
| <i>yosN</i> | 2,161,309 | 2,164,812 | - | 89   | 54   | 1.65 | 114  | 57   | 2.01 |
| <i>yosM</i> | 2,164,775 | 2,165,164 | - | 38   | 32   | 1.19 | 55   | 32   | 1.73 |
| <i>yosL</i> | 2,165,170 | 2,165,523 | - | 52   | 32   | 1.62 | 68   | 34   | 2.03 |
| <i>yosK</i> | 2,165,611 | 2,165,811 | - | 85   | 46   | 1.84 | 146  | 53   | 2.73 |
| <i>yosJ</i> | 2,165,856 | 2,166,050 | - | 87   | 38   | 2.29 | 122  | 47   | 2.58 |
| <i>yosH</i> | 2,166,237 | 2,166,707 | - | 105  | 55   | 1.91 | 146  | 66   | 2.21 |
| <i>yosG</i> | 2,166,768 | 2,167,130 | - | 97   | 49   | 1.98 | 140  | 56   | 2.51 |
| <i>yosE</i> | 2,167,312 | 2,167,659 | - | 55   | 31   | 1.78 | 60   | 30   | 2.00 |
| <i>yosD</i> | 2,167,674 | 2,168,069 | - | 85   | 43   | 1.95 | 113  | 53   | 2.14 |
| <i>yosC</i> | 2,168,108 | 2,168,650 | - | 79   | 46   | 1.71 | 104  | 56   | 1.85 |
| <i>yosB</i> | 2,168,695 | 2,168,874 | - | 97   | 54   | 1.79 | 89   | 61   | 1.46 |
| <i>yorZ</i> | 2,169,228 | 2,169,440 | - | 72   | 33   | 2.16 | 115  | 40   | 2.91 |
| <i>yorY</i> | 2,169,507 | 2,169,689 | - | 28   | 27   | 1.02 | 44   | 20   | 2.20 |
| <i>yorX</i> | 2,169,702 | 2,169,929 | - | 71   | 40   | 1.78 | 102  | 49   | 2.10 |
| <i>yorW</i> | 2,169,969 | 2,170,334 | - | 74   | 33   | 2.23 | 108  | 45   | 2.39 |
| <i>yorV</i> | 2,170,337 | 2,170,555 | - | 82   | 39   | 2.08 | 133  | 46   | 2.86 |
| <i>mbpP</i> | 2,170,599 | 2,171,930 | - | 99   | 49   | 2.04 | 132  | 56   | 2.36 |
| <i>yorS</i> | 2,172,130 | 2,172,648 | - | 57   | 43   | 1.32 | 89   | 46   | 1.92 |
| <i>yorR</i> | 2,172,657 | 2,173,154 | - | 131  | 104  | 1.26 | 159  | 88   | 1.81 |
| <i>yorQ</i> | 2,173,154 | 2,173,309 | - | 235  | 206  | 1.14 | 309  | 187  | 1.65 |
| <i>yorP</i> | 2,173,302 | 2,173,517 | - | 163  | 143  | 1.14 | 182  | 123  | 1.48 |
| <i>yorO</i> | 2,173,550 | 2,173,747 | - | 209  | 150  | 1.39 | 203  | 143  | 1.42 |

AbrB regulon

AbrB regulon

|             |           |           |   |      |      |      |      |      |      |              |
|-------------|-----------|-----------|---|------|------|------|------|------|------|--------------|
| <i>yorM</i> | 2,174,048 | 2,174,764 | - | 56   | 38   | 1.48 | 75   | 48   | 1.56 |              |
| <i>yorL</i> | 2,174,792 | 2,178,709 | - | 67   | 46   | 1.44 | 70   | 49   | 1.43 |              |
| <i>yorK</i> | 2,178,722 | 2,180,452 | - | 53   | 36   | 1.46 | 67   | 41   | 1.62 |              |
| <i>yorJ</i> | 2,180,452 | 2,181,588 | - | 52   | 33   | 1.59 | 68   | 37   | 1.82 |              |
| <i>yorI</i> | 2,181,604 | 2,183,118 | - | 73   | 42   | 1.74 | 90   | 46   | 1.96 |              |
| <i>yorH</i> | 2,183,133 | 2,183,603 | - | 74   | 40   | 1.84 | 106  | 50   | 2.11 |              |
| <i>yorG</i> | 2,183,646 | 2,184,617 | - | 126  | 54   | 2.35 | 181  | 71   | 2.53 |              |
| <i>yorF</i> | 2,184,700 | 2,185,614 | - | 132  | 49   | 2.69 | 179  | 81   | 2.22 |              |
| <i>yorE</i> | 2,185,636 | 2,186,007 | - | 135  | 49   | 2.78 | 209  | 138  | 1.51 |              |
| <i>yorD</i> | 2,186,181 | 2,186,495 | - | 1394 | 1469 | 0.95 | 1864 | 2305 | 0.81 | AbrB regulon |
| <i>yorC</i> | 2,186,572 | 2,186,952 | - | 355  | 185  | 1.92 | 414  | 280  | 1.48 |              |
| <i>yorB</i> | 2,187,015 | 2,187,311 | - | 1456 | 780  | 1.87 | 1424 | 996  | 1.43 |              |
| <i>yorA</i> | 2,187,400 | 2,189,160 | - | 178  | 105  | 1.71 | 132  | 74   | 1.79 |              |
| <i>yoqZ</i> | 2,189,157 | 2,189,981 | - | 162  | 109  | 1.49 | 150  | 77   | 1.95 |              |
| <i>yoqY</i> | 2,190,080 | 2,190,475 | - | 39   | 36   | 1.08 | 52   | 36   | 1.45 |              |
| <i>yoqX</i> | 2,190,530 | 2,190,751 | - | 33   | 32   | 1.02 | 43   | 31   | 1.39 |              |
| <i>yoqW</i> | 2,190,822 | 2,191,496 | + | 128  | 163  | 0.78 | 129  | 151  | 0.85 |              |
| <i>ligB</i> | 2,191,566 | 2,192,378 | + | 28   | 29   | 0.97 | 31   | 31   | 0.99 |              |
| <i>yoqU</i> | 2,192,444 | 2,192,857 | - | 43   | 34   | 1.29 | 53   | 41   | 1.30 |              |
| <i>yoqT</i> | 2,193,023 | 2,193,172 | + | 18   | 19   | 0.91 | 19   | 21   | 0.94 |              |
| <i>yoqS</i> | 2,193,249 | 2,193,596 | - | 77   | 49   | 1.58 | 85   | 65   | 1.30 |              |
| <i>yoqR</i> | 2,193,598 | 2,193,954 | - | 65   | 37   | 1.73 | 76   | 49   | 1.56 |              |
| <i>yoqP</i> | 2,193,914 | 2,194,255 | - | 65   | 52   | 1.26 | 72   | 55   | 1.32 |              |
| <i>yoqO</i> | 2,194,369 | 2,194,743 | + | 112  | 145  | 0.77 | 212  | 193  | 1.10 |              |
| <i>yoqN</i> | 2,194,760 | 2,194,978 | - | 90   | 60   | 1.52 | 81   | 66   | 1.23 |              |
| <i>yoqM</i> | 2,195,182 | 2,195,460 | + | 299  | 268  | 1.12 | 171  | 151  | 1.13 | AbrB regulon |
| <i>yoqL</i> | 2,195,585 | 2,196,277 | - | 58   | 43   | 1.35 | 69   | 55   | 1.25 |              |
| <i>yoqK</i> | 2,196,317 | 2,196,520 | - | 74   | 45   | 1.64 | 77   | 54   | 1.43 |              |
| <i>yoqJ</i> | 2,196,540 | 2,197,055 | - | 97   | 62   | 1.58 | 93   | 66   | 1.40 |              |
| <i>yoqI</i> | 2,197,266 | 2,197,460 | - | 69   | 45   | 1.55 | 59   | 48   | 1.24 |              |
| <i>yoqH</i> | 2,197,509 | 2,197,961 | - | 68   | 53   | 1.27 | 71   | 52   | 1.38 |              |
| <i>yoqG</i> | 2,198,044 | 2,198,301 | - | 81   | 54   | 1.49 | 90   | 71   | 1.27 |              |
| <i>yoqF</i> | 2,198,346 | 2,198,549 | - | 59   | 54   | 1.10 | 67   | 44   | 1.50 |              |
| <i>yoqE</i> | 2,198,558 | 2,198,722 | - | 116  | 70   | 1.65 | 107  | 99   | 1.08 |              |
| <i>yoqD</i> | 2,198,776 | 2,199,531 | - | 76   | 59   | 1.28 | 91   | 73   | 1.24 |              |
| <i>yoqC</i> | 2,199,572 | 2,199,979 | - | 51   | 47   | 1.10 | 67   | 51   | 1.32 |              |
| <i>yoqB</i> | 2,199,986 | 2,200,324 | - | 57   | 44   | 1.29 | 74   | 54   | 1.38 |              |
| <i>yoqA</i> | 2,200,321 | 2,200,671 | - | 99   | 76   | 1.30 | 118  | 84   | 1.40 |              |
| <i>yopZ</i> | 2,200,684 | 2,200,887 | - | 85   | 60   | 1.41 | 75   | 73   | 1.02 |              |
| <i>yopY</i> | 2,200,901 | 2,201,179 | - | 174  | 128  | 1.36 | 165  | 138  | 1.19 |              |
| <i>yopX</i> | 2,201,176 | 2,201,580 | - | 91   | 74   | 1.23 | 86   | 80   | 1.07 |              |
| <i>yopW</i> | 2,201,577 | 2,201,912 | - | 57   | 44   | 1.30 | 58   | 48   | 1.20 |              |
| <i>yopV</i> | 2,202,001 | 2,202,195 | - | 55   | 51   | 1.07 | 99   | 104  | 0.95 |              |
| <i>yopU</i> | 2,202,307 | 2,202,504 | - | 105  | 71   | 1.47 | 120  | 129  | 0.93 |              |
| <i>yopT</i> | 2,202,574 | 2,202,792 | - | 313  | 188  | 1.67 | 333  | 310  | 1.07 |              |
| <i>yopS</i> | 2,202,975 | 2,203,199 | + | 51   | 46   | 1.11 | 72   | 99   | 0.73 |              |
| <i>yopR</i> | 2,203,388 | 2,204,365 | - | 420  | 396  | 1.06 | 575  | 583  | 0.99 |              |
| <i>yopQ</i> | 2,204,389 | 2,205,771 | - | 455  | 435  | 1.04 | 535  | 629  | 0.85 |              |
| <i>yopP</i> | 2,205,878 | 2,206,954 | - | 203  | 194  | 1.05 | 165  | 240  | 0.69 |              |
| <i>yopO</i> | 2,206,944 | 2,207,156 | - | 123  | 99   | 1.24 | 84   | 100  | 0.84 |              |
| <i>yopN</i> | 2,207,204 | 2,207,521 | - | 183  | 178  | 1.03 | 240  | 279  | 0.86 |              |
| <i>yopM</i> | 2,207,524 | 2,207,724 | - | 139  | 105  | 1.32 | 128  | 154  | 0.83 |              |
| <i>yopK</i> | 2,208,190 | 2,209,350 | - | 130  | 116  | 1.12 | 148  | 170  | 0.87 |              |
| <i>yopJ</i> | 2,209,527 | 2,209,943 | - | 257  | 193  | 1.33 | 386  | 420  | 0.92 |              |
| <i>yopI</i> | 2,209,945 | 2,210,478 | - | 356  | 270  | 1.32 | 337  | 374  | 0.90 |              |
| <i>yopH</i> | 2,210,505 | 2,211,041 | - | 280  | 240  | 1.16 | 227  | 285  | 0.80 |              |
| <i>yopF</i> | 2,211,222 | 2,211,437 | - | 147  | 133  | 1.11 | 169  | 233  | 0.72 |              |
| <i>yopE</i> | 2,211,441 | 2,211,692 | - | 238  | 182  | 1.31 | 185  | 284  | 0.65 |              |
| <i>yopD</i> | 2,212,279 | 2,212,674 | - | 556  | 472  | 1.18 | 551  | 573  | 0.96 |              |
| <i>yopC</i> | 2,212,732 | 2,214,060 | - | 329  | 290  | 1.13 | 359  | 408  | 0.88 |              |
| <i>yopB</i> | 2,214,168 | 2,214,395 | - | 51   | 50   | 1.02 | 62   | 67   | 0.92 |              |
| <i>yopA</i> | 2,214,656 | 2,215,972 | - | 274  | 229  | 1.20 | 281  | 243  | 1.16 |              |
| <i>yonX</i> | 2,216,329 | 2,216,835 | - | 47   | 36   | 1.31 | 45   | 35   | 1.29 |              |
| <i>yonV</i> | 2,217,163 | 2,218,395 | - | 35   | 34   | 1.02 | 39   | 35   | 1.11 |              |
| <i>yonU</i> | 2,218,477 | 2,218,665 | - | 1105 | 1105 | 1.00 | 1176 | 1069 | 1.10 |              |
| <i>yonT</i> | 2,218,980 | 2,219,156 | - | 59   | 91   | 0.65 | 61   | 72   | 0.84 |              |
| <i>yonS</i> | 2,219,531 | 2,220,142 | - | 297  | 297  | 1.00 | 530  | 611  | 0.87 |              |
| <i>yonR</i> | 2,220,257 | 2,220,583 | - | 189  | 212  | 0.89 | 200  | 254  | 0.79 |              |
| <i>yonP</i> | 2,221,536 | 2,221,730 | + | 47   | 30   | 1.59 | 72   | 32   | 2.28 |              |
| <i>yonO</i> | 2,221,770 | 2,224,289 | + | 49   | 29   | 1.67 | 65   | 33   | 1.94 |              |
| <i>yonN</i> | 2,224,533 | 2,224,811 | + | 162  | 78   | 2.07 | 279  | 120  | 2.32 |              |
| <i>yonK</i> | 2,226,493 | 2,226,684 | + | 71   | 28   | 2.59 | 90   | 34   | 2.69 |              |
| <i>yonJ</i> | 2,226,701 | 2,227,918 | + | 157  | 57   | 2.74 | 229  | 72   | 3.17 |              |
| <i>yonI</i> | 2,227,952 | 2,228,362 | - | 210  | 202  | 1.04 | 234  | 245  | 0.96 |              |
| <i>yonH</i> | 2,228,581 | 2,229,081 | + | 101  | 41   | 2.48 | 143  | 46   | 3.14 |              |
| <i>yonG</i> | 2,229,184 | 2,230,104 | + | 47   | 38   | 1.22 | 53   | 34   | 1.56 |              |
| <i>yonF</i> | 2,230,091 | 2,231,860 | + | 60   | 37   | 1.64 | 80   | 36   | 2.24 |              |
| <i>yonE</i> | 2,231,878 | 2,233,398 | + | 96   | 44   | 2.16 | 135  | 54   | 2.49 |              |
| <i>yonD</i> | 2,233,429 | 2,234,865 | + | 365  | 99   | 3.68 | 453  | 117  | 3.88 |              |
| <i>yonC</i> | 2,234,890 | 2,235,426 | + | 239  | 72   | 3.33 | 349  | 83   | 4.22 |              |
| <i>yonB</i> | 2,235,465 | 2,236,481 | + | 322  | 84   | 3.85 | 431  | 96   | 4.51 |              |
| <i>yonA</i> | 2,236,517 | 2,236,987 | + | 355  | 86   | 4.12 | 493  | 113  | 4.37 |              |
| <i>yomZ</i> | 2,237,002 | 2,237,397 | + | 214  | 51   | 4.18 | 312  | 64   | 4.87 |              |
| <i>yomY</i> | 2,237,394 | 2,237,648 | + | 272  | 60   | 4.55 | 390  | 79   | 4.91 |              |
| <i>yomX</i> | 2,237,632 | 2,238,282 | + | 258  | 59   | 4.37 | 363  | 73   | 5.00 |              |
| <i>yomW</i> | 2,238,279 | 2,238,785 | + | 339  | 73   | 4.61 | 461  | 79   | 5.81 |              |
| <i>yomV</i> | 2,238,782 | 2,239,492 | + | 245  | 59   | 4.12 | 344  | 69   | 4.97 |              |
| <i>yomU</i> | 2,239,535 | 2,240,332 | + | 253  | 67   | 3.79 | 365  | 82   | 4.47 |              |
| <i>yomT</i> | 2,240,961 | 2,241,188 | + | 74   | 44   | 1.69 | 111  | 43   | 2.60 |              |
| <i>yomS</i> | 2,241,252 | 2,241,608 | + | 123  | 48   | 2.54 | 154  | 48   | 3.23 |              |
| <i>yomR</i> | 2,241,610 | 2,242,827 | + | 161  | 58   | 2.78 | 215  | 55   | 3.92 |              |

|             |           |           |   |      |      |      |      |      |      |              |
|-------------|-----------|-----------|---|------|------|------|------|------|------|--------------|
| <i>yomQ</i> | 2,242,838 | 2,243,188 | + | 206  | 65   | 3.18 | 266  | 75   | 3.56 |              |
| <i>yomP</i> | 2,243,185 | 2,243,376 | + | 92   | 32   | 2.87 | 99   | 33   | 3.03 |              |
| <i>yomO</i> | 2,243,426 | 2,243,926 | + | 101  | 39   | 2.56 | 119  | 39   | 3.07 |              |
| <i>yomN</i> | 2,243,910 | 2,244,329 | + | 152  | 55   | 2.78 | 224  | 61   | 3.70 |              |
| <i>yomM</i> | 2,244,343 | 2,245,344 | + | 119  | 49   | 2.42 | 164  | 50   | 3.29 |              |
| <i>yoZP</i> | 2,245,347 | 2,245,676 | - | 47   | 53   | 0.89 | 75   | 77   | 0.97 |              |
| <i>yomL</i> | 2,245,852 | 2,246,538 | - | 869  | 854  | 1.02 | 1372 | 1120 | 1.22 |              |
| <i>yomK</i> | 2,247,085 | 2,247,531 | + | 2114 | 2082 | 1.02 | 1274 | 1425 | 0.89 |              |
| <i>yomJ</i> | 2,247,613 | 2,248,296 | + | 1201 | 1211 | 0.99 | 942  | 1070 | 0.88 |              |
| <i>yomI</i> | 2,248,350 | 2,255,207 | + | 60   | 43   | 1.41 | 70   | 44   | 1.59 | AbrB regulon |
| <i>yomH</i> | 2,255,258 | 2,256,016 | + | 38   | 25   | 1.53 | 59   | 27   | 2.21 |              |
| <i>yomG</i> | 2,256,028 | 2,258,655 | + | 73   | 49   | 1.48 | 91   | 54   | 1.69 |              |
| <i>yomF</i> | 2,258,671 | 2,259,492 | + | 57   | 33   | 1.74 | 76   | 36   | 2.11 |              |
| <i>yomE</i> | 2,259,529 | 2,261,463 | + | 62   | 38   | 1.62 | 86   | 37   | 2.31 |              |
| <i>yomD</i> | 2,261,633 | 2,262,457 | + | 51   | 26   | 2.01 | 70   | 27   | 2.58 |              |
| <i>blyA</i> | 2,262,685 | 2,263,788 | + | 51   | 32   | 1.59 | 70   | 32   | 2.18 |              |
| <i>bhlA</i> | 2,263,876 | 2,264,088 | + | 38   | 25   | 1.52 | 38   | 28   | 1.37 |              |
| <i>bhlB</i> | 2,264,099 | 2,264,365 | + | 23   | 24   | 0.96 | 25   | 20   | 1.23 |              |
| <i>bdbB</i> | 2,264,421 | 2,264,867 | - | 189  | 200  | 0.95 | 396  | 480  | 0.83 | AbrB regulon |
| <i>yoIJ</i> | 2,264,864 | 2,266,132 | - | 500  | 372  | 1.35 | 673  | 816  | 0.83 | AbrB regulon |
| <i>bdbA</i> | 2,266,132 | 2,266,545 | - | 302  | 179  | 1.68 | 387  | 550  | 0.70 | AbrB regulon |
| <i>sunT</i> | 2,266,542 | 2,268,659 | - | 262  | 172  | 1.53 | 394  | 523  | 0.75 | AbrB regulon |
| <i>sunA</i> | 2,268,717 | 2,268,887 | - | 4302 | 4131 | 1.04 | 6893 | 5382 | 1.28 | AbrB regulon |
| <i>yoIF</i> | 2,269,184 | 2,269,501 | - | 1089 | 1343 | 0.81 | 1073 | 1395 | 0.77 |              |
| <i>uvrX</i> | 2,269,603 | 2,270,853 | - | 49   | 55   | 0.90 | 53   | 50   | 1.08 |              |
| <i>yoID</i> | 2,270,846 | 2,271,178 | - | 25   | 29   | 0.87 | 31   | 28   | 1.10 |              |
| <i>yoIC</i> | 2,271,352 | 2,271,687 | + | 188  | 188  | 1.00 | 221  | 245  | 0.90 | AbrB regulon |
| <i>yoIB</i> | 2,271,730 | 2,272,086 | - | 1621 | 1920 | 0.84 | 1604 | 1822 | 0.88 | AbrB regulon |
| <i>yoIA</i> | 2,272,092 | 2,272,559 | - | 4304 | 4869 | 0.88 | 3786 | 4257 | 0.89 | AbrB regulon |
| <i>yoKL</i> | 2,273,185 | 2,273,718 | - | 249  | 207  | 1.20 | 375  | 421  | 0.89 | AbrB regulon |
| <i>yoK</i>  | 2,273,754 | 2,274,332 | - | 378  | 302  | 1.25 | 553  | 592  | 0.93 | AbrB regulon |
| <i>yoKJ</i> | 2,274,396 | 2,274,893 | - | 419  | 360  | 1.16 | 683  | 789  | 0.87 | AbrB regulon |
| <i>yoKI</i> | 2,274,902 | 2,276,617 | - | 488  | 428  | 1.14 | 723  | 865  | 0.84 | AbrB regulon |
| <i>yoKH</i> | 2,276,717 | 2,277,274 | - | 512  | 455  | 1.13 | 760  | 667  | 1.14 |              |
| <i>yoKG</i> | 2,277,798 | 2,278,871 | - | 1882 | 1608 | 1.17 | 1658 | 1447 | 1.15 |              |
| <i>yoKF</i> | 2,279,173 | 2,280,063 | + | 576  | 549  | 1.05 | 921  | 870  | 1.06 |              |
| <i>yoKE</i> | 2,280,077 | 2,280,559 | + | 165  | 126  | 1.31 | 255  | 234  | 1.09 |              |
| <i>yoKD</i> | 2,280,863 | 2,281,681 | + | 387  | 261  | 1.48 | 383  | 374  | 1.02 |              |
| <i>yoKC</i> | 2,282,332 | 2,282,847 | - | 104  | 105  | 0.98 | 105  | 124  | 0.85 |              |
| <i>yoKB</i> | 2,283,054 | 2,283,764 | - | 212  | 225  | 0.94 | 212  | 250  | 0.85 |              |
| <i>yoKA</i> | 2,283,967 | 2,285,604 | + | 127  | 103  | 1.23 | 232  | 285  | 0.81 |              |
| <i>ypqP</i> | 2,285,626 | 2,286,249 | + | 111  | 94   | 1.19 | 231  | 239  | 0.96 |              |
| <i>ypqQ</i> | 2,286,293 | 2,286,724 | - | 497  | 538  | 0.92 | 646  | 702  | 0.92 |              |
| <i>msrA</i> | 2,286,725 | 2,287,258 | - | 663  | 680  | 0.97 | 551  | 625  | 0.88 |              |
| <i>ypoP</i> | 2,287,390 | 2,287,815 | + | 470  | 490  | 0.96 | 457  | 620  | 0.74 |              |
| <i>ypnP</i> | 2,287,865 | 2,289,202 | - | 67   | 67   | 0.99 | 78   | 90   | 0.87 |              |
| <i>ypmT</i> | 2,289,274 | 2,289,468 | - | 105  | 102  | 1.03 | 187  | 171  | 1.10 |              |
| <i>ypmS</i> | 2,289,481 | 2,290,044 | - | 360  | 384  | 0.94 | 462  | 568  | 0.81 |              |
| <i>ypmR</i> | 2,290,054 | 2,290,821 | - | 454  | 528  | 0.86 | 557  | 777  | 0.72 |              |
| <i>ypmQ</i> | 2,290,899 | 2,291,480 | - | 598  | 671  | 0.89 | 666  | 910  | 0.73 |              |
| <i>ypmP</i> | 2,291,628 | 2,291,879 | - | 1243 | 1356 | 0.92 | 1812 | 2059 | 0.88 |              |
| <i>ilvA</i> | 2,291,965 | 2,293,233 | - | 1044 | 1267 | 0.82 | 1244 | 1668 | 0.75 |              |
| <i>ypIP</i> | 2,293,482 | 2,294,477 | + | 545  | 483  | 1.13 | 298  | 477  | 0.62 |              |
| <i>ypIQ</i> | 2,294,498 | 2,295,139 | + | 793  | 717  | 1.11 | 408  | 543  | 0.75 |              |
| <i>ypkP</i> | 2,295,178 | 2,295,798 | - | 309  | 263  | 1.17 | 450  | 459  | 0.98 |              |
| <i>dfrA</i> | 2,295,799 | 2,296,305 | - | 303  | 240  | 1.26 | 377  | 405  | 0.93 |              |
| <i>thyB</i> | 2,296,302 | 2,297,096 | - | 309  | 310  | 1.00 | 404  | 454  | 0.89 |              |
| <i>ypjQ</i> | 2,297,180 | 2,297,713 | - | 706  | 837  | 0.84 | 781  | 917  | 0.85 |              |
| <i>ypjP</i> | 2,297,731 | 2,298,342 | - | 1013 | 996  | 1.02 | 729  | 895  | 0.81 |              |
| <i>ypiP</i> | 2,298,602 | 2,299,120 | - | 246  | 234  | 1.05 | 283  | 286  | 0.99 |              |
| <i>ypHP</i> | 2,299,417 | 2,299,851 | - | 647  | 565  | 1.14 | 963  | 952  | 1.01 |              |
| <i>ilvD</i> | 2,299,958 | 2,301,634 | - | 1415 | 1797 | 0.79 | 2105 | 2405 | 0.88 |              |
| <i>ypgR</i> | 2,301,923 | 2,303,056 | - | 743  | 630  | 1.18 | 1108 | 1032 | 1.07 |              |
| <i>ypgQ</i> | 2,303,116 | 2,303,733 | - | 397  | 382  | 1.04 | 640  | 528  | 1.21 |              |
| <i>bsaA</i> | 2,303,749 | 2,304,231 | - | 270  | 262  | 1.03 | 424  | 379  | 1.12 |              |
| <i>metA</i> | 2,304,574 | 2,305,248 | + | 255  | 292  | 0.87 | 283  | 444  | 0.64 |              |
| <i>ugtP</i> | 2,305,711 | 2,306,859 | + | 582  | 566  | 1.03 | 719  | 971  | 0.74 |              |
| <i>cspD</i> | 2,307,102 | 2,307,302 | + | 5299 | 5873 | 0.90 | 7133 | 6563 | 1.09 |              |
| <i>degR</i> | 2,307,354 | 2,307,536 | + | 438  | 388  | 1.13 | 609  | 466  | 1.31 | SigD regulon |
| <i>ypzA</i> | 2,307,692 | 2,307,961 | - | 76   | 89   | 0.86 | 59   | 79   | 0.74 |              |
| <i>ypeQ</i> | 2,307,989 | 2,308,171 | - | 99   | 92   | 1.08 | 169  | 181  | 0.94 |              |
| <i>ypeP</i> | 2,308,164 | 2,308,526 | - | 247  | 235  | 1.05 | 275  | 245  | 1.12 |              |
| <i>ypdP</i> | 2,308,927 | 2,309,616 | + | 191  | 190  | 1.01 | 155  | 176  | 0.88 |              |
| <i>ypdQ</i> | 2,309,616 | 2,310,014 | + | 313  | 280  | 1.12 | 338  | 358  | 0.94 |              |
| <i>ypcP</i> | 2,310,192 | 2,311,082 | - | 300  | 275  | 1.09 | 244  | 337  | 0.73 |              |
| <i>ypbS</i> | 2,311,404 | 2,311,661 | - | 840  | 1103 | 0.76 | 1390 | 1426 | 0.97 |              |
| <i>ypbR</i> | 2,311,726 | 2,315,307 | - | 316  | 291  | 1.09 | 651  | 547  | 1.19 |              |
| <i>ypbQ</i> | 2,315,643 | 2,316,149 | - | 36   | 46   | 0.78 | 45   | 51   | 0.88 |              |
| <i>bcsA</i> | 2,316,153 | 2,317,250 | - | 35   | 39   | 0.91 | 36   | 45   | 0.79 |              |
| <i>pbuX</i> | 2,317,324 | 2,318,640 | - | 380  | 458  | 0.83 | 866  | 1113 | 0.78 |              |
| <i>xpt</i>  | 2,318,637 | 2,319,221 | - | 573  | 675  | 0.85 | 1279 | 1584 | 0.81 |              |
| <i>ypwA</i> | 2,319,552 | 2,321,057 | - | 1347 | 1271 | 1.06 | 1513 | 1266 | 1.20 |              |
| <i>kdgT</i> | 2,321,169 | 2,322,161 | - | 160  | 195  | 0.82 | 127  | 163  | 0.78 |              |
| <i>kdgA</i> | 2,322,206 | 2,322,796 | - | 150  | 199  | 0.75 | 150  | 187  | 0.80 |              |
| <i>kdgK</i> | 2,322,798 | 2,323,772 | - | 229  | 288  | 0.80 | 263  | 313  | 0.84 |              |
| <i>kdgR</i> | 2,323,810 | 2,324,829 | - | 288  | 325  | 0.89 | 299  | 404  | 0.74 |              |
| <i>kduI</i> | 2,325,051 | 2,325,878 | + | 581  | 718  | 0.81 | 646  | 822  | 0.79 |              |
| <i>kduD</i> | 2,325,880 | 2,326,644 | + | 276  | 348  | 0.79 | 280  | 361  | 0.78 |              |
| <i>ypvA</i> | 2,326,685 | 2,328,610 | - | 366  | 314  | 1.17 | 501  | 480  | 1.04 |              |
| <i>ypTA</i> | 2,328,712 | 2,328,903 | - | 107  | 105  | 1.02 | 194  | 196  | 0.99 |              |
| <i>ypsC</i> | 2,329,272 | 2,330,429 | - | 579  | 505  | 1.15 | 744  | 854  | 0.87 |              |

|               |           |           |   |      |      |      |      |      |      |               |
|---------------|-----------|-----------|---|------|------|------|------|------|------|---------------|
| <i>ypsB</i>   | 2,330,976 | 2,331,272 | - | 2516 | 2577 | 0.98 | 2377 | 2378 | 1.00 |               |
| <i>ypsA</i>   | 2,331,350 | 2,331,892 | - | 366  | 282  | 1.30 | 473  | 471  | 1.00 |               |
| <i>cotD</i>   | 2,331,981 | 2,332,208 | - | 1096 | 740  | 1.48 | 1081 | 958  | 1.13 | Spo0A regulon |
| <i>yprB</i>   | 2,332,521 | 2,333,762 | - | 1046 | 622  | 1.68 | 901  | 588  | 1.53 |               |
| <i>yprA</i>   | 2,333,778 | 2,336,027 | - | 379  | 243  | 1.56 | 659  | 484  | 1.36 |               |
| <i>ypqE</i>   | 2,336,130 | 2,336,636 | - | 1351 | 1002 | 1.35 | 1972 | 1785 | 1.10 |               |
| <i>ypqA</i>   | 2,336,774 | 2,337,193 | + | 38   | 37   | 1.04 | 32   | 37   | 0.86 |               |
| <i>yppG</i>   | 2,337,214 | 2,337,591 | - | 30   | 33   | 0.91 | 36   | 35   | 1.05 |               |
| <i>yppF</i>   | 2,337,779 | 2,337,967 | + | 162  | 222  | 0.73 | 104  | 158  | 0.66 | Spo0A regulon |
| <i>yppE</i>   | 2,338,006 | 2,338,377 | - | 165  | 132  | 1.25 | 301  | 309  | 0.97 |               |
| <i>yppD</i>   | 2,338,423 | 2,338,668 | - | 45   | 50   | 0.90 | 42   | 52   | 0.79 | Spo0A regulon |
| <i>yppC</i>   | 2,338,996 | 2,339,958 | - | 49   | 51   | 0.95 | 44   | 49   | 0.89 |               |
| <i>recU</i>   | 2,339,999 | 2,340,619 | + | 1071 | 670  | 1.60 | 1273 | 1197 | 1.06 |               |
| <i>ponA</i>   | 2,340,641 | 2,343,385 | + | 1480 | 1106 | 1.34 | 2113 | 1814 | 1.16 |               |
| <i>ypoC</i>   | 2,343,461 | 2,343,955 | - | 302  | 295  | 1.02 | 441  | 459  | 0.96 |               |
| <i>nth</i>    | 2,343,952 | 2,344,611 | - | 531  | 504  | 1.05 | 693  | 688  | 1.01 |               |
| <i>dnaD</i>   | 2,344,630 | 2,345,328 | - | 803  | 763  | 1.05 | 947  | 946  | 1.00 |               |
| <i>asnS</i>   | 2,345,421 | 2,346,713 | - | 1551 | 1541 | 1.01 | 1921 | 2096 | 0.92 |               |
| <i>aspB</i>   | 2,346,857 | 2,348,038 | - | 1704 | 1669 | 1.02 | 2800 | 2757 | 1.02 |               |
| <i>ypmB</i>   | 2,348,061 | 2,348,546 | - | 2264 | 2114 | 1.07 | 3055 | 3228 | 0.95 |               |
| <i>ypmA</i>   | 2,348,555 | 2,348,725 | - | 665  | 456  | 1.46 | 1092 | 1270 | 0.86 |               |
| <i>dinG</i>   | 2,348,868 | 2,351,663 | - | 441  | 342  | 1.29 | 834  | 924  | 0.90 |               |
| <i>panD</i>   | 2,351,789 | 2,352,172 | - | 928  | 868  | 1.07 | 863  | 839  | 1.03 |               |
| <i>panC</i>   | 2,352,174 | 2,353,034 | - | 1455 | 1386 | 1.05 | 1945 | 1685 | 1.15 |               |
| <i>panB</i>   | 2,353,036 | 2,353,869 | - | 1440 | 1401 | 1.03 | 1945 | 1721 | 1.13 |               |
| <i>birA</i>   | 2,354,115 | 2,355,092 | - | 367  | 284  | 1.29 | 970  | 834  | 1.16 |               |
| <i>cca</i>    | 2,355,077 | 2,356,270 | - | 466  | 344  | 1.36 | 1038 | 911  | 1.14 |               |
| <i>ypjH</i>   | 2,356,275 | 2,357,408 | - | 443  | 336  | 1.32 | 1024 | 924  | 1.11 |               |
| <i>ypjG</i>   | 2,357,440 | 2,358,114 | - | 420  | 295  | 1.42 | 928  | 860  | 1.08 |               |
| <i>mgsA</i>   | 2,358,107 | 2,358,520 | - | 565  | 415  | 1.36 | 1090 | 981  | 1.11 |               |
| <i>dapB</i>   | 2,358,536 | 2,359,339 | - | 484  | 351  | 1.38 | 998  | 897  | 1.11 |               |
| <i>ypjD</i>   | 2,359,351 | 2,359,686 | - | 478  | 393  | 1.22 | 844  | 837  | 1.01 |               |
| <i>ypjC</i>   | 2,360,051 | 2,360,698 | + | 238  | 204  | 1.17 | 379  | 338  | 1.12 |               |
| <i>ypjB</i>   | 2,360,740 | 2,361,534 | - | 227  | 204  | 1.11 | 323  | 318  | 1.02 |               |
| <i>ypjA</i>   | 2,361,603 | 2,362,160 | - | 208  | 192  | 1.08 | 236  | 233  | 1.01 |               |
| <i>qcrC</i>   | 2,362,307 | 2,363,074 | - | 1510 | 2021 | 0.75 | 1371 | 1764 | 0.78 |               |
| <i>qcrB</i>   | 2,363,109 | 2,363,783 | - | 1677 | 2190 | 0.77 | 1554 | 1963 | 0.79 |               |
| <i>qcrA</i>   | 2,363,785 | 2,364,288 | - | 2146 | 2804 | 0.77 | 2160 | 2558 | 0.84 |               |
| <i>ypiF</i>   | 2,364,431 | 2,364,877 | - | 355  | 530  | 0.67 | 432  | 622  | 0.69 |               |
| <i>ypiB</i>   | 2,364,932 | 2,365,471 | - | 1345 | 1897 | 0.71 | 1059 | 1180 | 0.90 |               |
| <i>ypiA</i>   | 2,365,543 | 2,366,814 | - | 427  | 323  | 1.32 | 481  | 402  | 1.20 |               |
| <i>aroE</i>   | 2,367,150 | 2,368,436 | - | 760  | 884  | 0.86 | 1721 | 1937 | 0.89 |               |
| <i>tyrA</i>   | 2,368,447 | 2,369,562 | - | 487  | 553  | 0.88 | 1826 | 2153 | 0.85 |               |
| <i>hisC</i>   | 2,369,611 | 2,370,693 | - | 803  | 734  | 1.09 | 1624 | 1997 | 0.81 |               |
| <i>trpA</i>   | 2,370,704 | 2,371,507 | - | 502  | 400  | 1.26 | 872  | 1205 | 0.72 |               |
| <i>trpB</i>   | 2,371,500 | 2,372,702 | - | 149  | 164  | 0.91 | 178  | 200  | 0.89 |               |
| <i>trpF</i>   | 2,372,683 | 2,373,330 | - | 149  | 159  | 0.94 | 172  | 189  | 0.91 |               |
| <i>trpC</i>   | 2,373,335 | 2,374,087 | - | 118  | 120  | 0.98 | 109  | 124  | 0.88 |               |
| <i>trpD</i>   | 2,374,080 | 2,375,096 | - | 145  | 146  | 0.99 | 110  | 134  | 0.82 |               |
| <i>trpE</i>   | 2,375,068 | 2,376,615 | - | 143  | 136  | 1.05 | 122  | 183  | 0.67 |               |
| <i>aroH</i>   | 2,376,831 | 2,377,214 | - | 1087 | 1281 | 0.85 | 2020 | 2459 | 0.82 |               |
| <i>aroB</i>   | 2,377,211 | 2,378,299 | - | 1042 | 1257 | 0.83 | 2204 | 2673 | 0.82 |               |
| <i>aroF</i>   | 2,378,361 | 2,379,470 | - | 778  | 979  | 0.79 | 1904 | 2392 | 0.80 |               |
| <i>cheR</i>   | 2,379,545 | 2,380,315 | - | 296  | 398  | 0.74 | 388  | 489  | 0.79 |               |
| <i>ndk</i>    | 2,380,552 | 2,381,001 | - | 1117 | 1789 | 0.62 | 1111 | 1542 | 0.72 |               |
| <i>hepT</i>   | 2,381,117 | 2,382,163 | - | 550  | 507  | 1.08 | 903  | 1294 | 0.70 |               |
| <i>menH</i>   | 2,382,105 | 2,382,806 | - | 883  | 830  | 1.06 | 1181 | 1577 | 0.75 |               |
| <i>hepS</i>   | 2,382,813 | 2,383,568 | - | 576  | 622  | 0.93 | 845  | 1255 | 0.67 |               |
| <i>mtrB</i>   | 2,383,731 | 2,383,958 | - | 1078 | 1142 | 0.94 | 1139 | 1474 | 0.77 |               |
| <i>mtrA</i>   | 2,383,980 | 2,384,552 | - | 1149 | 1220 | 0.94 | 1244 | 1369 | 0.91 |               |
| <i>hbs</i>    | 2,384,740 | 2,385,018 | - | 4989 | 5376 | 0.93 | 4469 | 4400 | 1.02 |               |
| <i>spoIVA</i> | 2,385,392 | 2,386,870 | - | 70   | 82   | 0.85 | 76   | 90   | 0.84 |               |
| <i>yphF</i>   | 2,387,051 | 2,387,785 | - | 418  | 496  | 0.84 | 581  | 745  | 0.78 | AbrB regulon  |
| <i>yphE</i>   | 2,387,807 | 2,388,010 | - | 590  | 658  | 0.90 | 821  | 1018 | 0.81 | AbrB regulon  |
| <i>gpsA</i>   | 2,388,348 | 2,389,385 | - | 1181 | 1070 | 1.10 | 1483 | 1365 | 1.09 |               |
| <i>yphC</i>   | 2,389,403 | 2,390,713 | - | 1068 | 908  | 1.18 | 1264 | 1233 | 1.03 |               |
| <i>seaA</i>   | 2,391,058 | 2,391,951 | - | 129  | 110  | 1.17 | 107  | 107  | 1.00 |               |
| <i>yphA</i>   | 2,391,948 | 2,392,547 | - | 115  | 99   | 1.16 | 91   | 83   | 1.10 |               |
| <i>ypgA</i>   | 2,392,799 | 2,393,437 | - | 595  | 548  | 1.09 | 689  | 788  | 0.87 |               |
| <i>ypjD</i>   | 2,393,861 | 2,395,009 | - | 4551 | 4720 | 0.96 | 4350 | 4289 | 1.01 |               |
| <i>cmk</i>    | 2,395,242 | 2,395,916 | - | 573  | 652  | 0.88 | 635  | 907  | 0.70 |               |
| <i>ypjB</i>   | 2,395,995 | 2,396,171 | - | 136  | 125  | 1.08 | 166  | 189  | 0.88 |               |
| <i>ypjA</i>   | 2,396,216 | 2,396,869 | - | 298  | 315  | 0.95 | 381  | 461  | 0.83 |               |
| <i>ypeB</i>   | 2,396,962 | 2,398,314 | - | 72   | 68   | 1.05 | 62   | 68   | 0.91 |               |
| <i>sleB</i>   | 2,398,349 | 2,399,266 | - | 58   | 59   | 0.98 | 47   | 54   | 0.86 |               |
| <i>ypdC</i>   | 2,399,405 | 2,400,061 | - | 217  | 191  | 1.14 | 261  | 330  | 0.79 |               |
| <i>ypdA</i>   | 2,400,181 | 2,401,155 | - | 608  | 554  | 1.10 | 891  | 1032 | 0.86 |               |
| <i>gudB</i>   | 2,401,264 | 2,402,544 | - | 2068 | 1938 | 1.07 | 2488 | 2356 | 1.06 |               |
| <i>yphH</i>   | 2,402,700 | 2,403,284 | - | 1060 | 1260 | 0.84 | 879  | 937  | 0.94 |               |
| <i>yphG</i>   | 2,403,443 | 2,404,222 | - | 142  | 151  | 0.94 | 285  | 243  | 1.18 |               |
| <i>yphF</i>   | 2,404,308 | 2,404,751 | - | 219  | 207  | 1.05 | 242  | 326  | 0.74 |               |
| <i>yphE</i>   | 2,404,814 | 2,405,536 | - | 787  | 743  | 1.06 | 882  | 1078 | 0.82 |               |
| <i>yphD</i>   | 2,405,487 | 2,406,056 | - | 396  | 323  | 1.23 | 400  | 495  | 0.81 |               |
| <i>recQ</i>   | 2,406,116 | 2,407,606 | - | 611  | 534  | 1.14 | 672  | 767  | 0.88 |               |
| <i>yphB</i>   | 2,407,599 | 2,408,657 | - | 255  | 243  | 1.05 | 273  | 348  | 0.78 |               |
| <i>fer</i>    | 2,408,923 | 2,409,171 | + | 1279 | 1451 | 0.88 | 1362 | 1530 | 0.89 |               |
| <i>ypaA</i>   | 2,409,211 | 2,409,783 | - | 379  | 481  | 0.79 | 182  | 204  | 0.89 |               |
| <i>ypzE</i>   | 2,409,889 | 2,410,053 | - | 786  | 923  | 0.85 | 226  | 300  | 0.75 |               |
| <i>serA</i>   | 2,410,280 | 2,411,857 | + | 1926 | 2411 | 0.80 | 3177 | 3836 | 0.83 |               |
| <i>aroC</i>   | 2,411,900 | 2,412,667 | - | 379  | 327  | 1.16 | 387  | 387  | 1.00 |               |
| <i>rsiX</i>   | 2,412,779 | 2,413,885 | - | 556  | 551  | 1.01 | 753  | 866  | 0.87 |               |

|                |           |           |   |      |      |      |      |      |      |                        |
|----------------|-----------|-----------|---|------|------|------|------|------|------|------------------------|
| <i>sigX</i>    | 2,413,821 | 2,414,405 | - | 676  | 768  | 0.88 | 953  | 1086 | 0.88 |                        |
| <i>resE</i>    | 2,414,609 | 2,416,378 | - | 1361 | 1319 | 1.03 | 1012 | 1001 | 1.01 |                        |
| <i>resD</i>    | 2,416,375 | 2,417,097 | - | 1565 | 1483 | 1.06 | 989  | 1049 | 0.94 |                        |
| <i>resC</i>    | 2,417,178 | 2,418,236 | - | 970  | 860  | 1.13 | 446  | 505  | 0.88 |                        |
| <i>resB</i>    | 2,418,372 | 2,420,000 | - | 907  | 750  | 1.21 | 623  | 716  | 0.87 |                        |
| <i>resA</i>    | 2,419,997 | 2,420,542 | - | 913  | 796  | 1.15 | 912  | 969  | 0.94 |                        |
| <i>rluB</i>    | 2,420,674 | 2,421,363 | - | 889  | 808  | 1.10 | 1102 | 949  | 1.16 |                        |
| <i>spmB</i>    | 2,421,455 | 2,421,994 | - | 34   | 36   | 0.94 | 38   | 44   | 0.86 |                        |
| <i>spmA</i>    | 2,421,999 | 2,422,589 | - | 87   | 83   | 1.05 | 81   | 100  | 0.81 |                        |
| <i>dacB</i>    | 2,422,577 | 2,423,725 | - | 61   | 58   | 1.05 | 75   | 78   | 0.95 |                        |
| <i>ypuI</i>    | 2,423,848 | 2,424,387 | - | 193  | 152  | 1.27 | 252  | 271  | 0.93 |                        |
| <i>ypuH</i>    | 2,424,442 | 2,425,035 | - | 411  | 313  | 1.31 | 591  | 651  | 0.91 |                        |
| <i>ypuG</i>    | 2,425,025 | 2,425,780 | - | 295  | 261  | 1.13 | 477  | 538  | 0.89 |                        |
| <i>ypuF</i>    | 2,426,061 | 2,426,585 | + | 91   | 86   | 1.06 | 82   | 91   | 0.90 |                        |
| <i>ribT</i>    | 2,426,599 | 2,426,973 | - | 1167 | 1180 | 0.99 | 1421 | 1574 | 0.90 |                        |
| <i>ribH</i>    | 2,427,086 | 2,427,550 | - | 1072 | 896  | 1.20 | 1237 | 1158 | 1.07 |                        |
| <i>ribA</i>    | 2,427,583 | 2,428,779 | - | 1012 | 809  | 1.25 | 1026 | 1005 | 1.02 |                        |
| <i>ribE</i>    | 2,428,794 | 2,429,441 | - | 853  | 702  | 1.22 | 979  | 909  | 1.08 |                        |
| <i>ribD</i>    | 2,429,452 | 2,430,537 | - | 930  | 847  | 1.10 | 947  | 873  | 1.09 |                        |
| <i>ypuD</i>    | 2,430,930 | 2,431,274 | - | 521  | 541  | 0.96 | 531  | 275  | 1.93 |                        |
| <i>sipS</i>    | 2,431,509 | 2,432,063 | - | 659  | 580  | 1.14 | 806  | 893  | 0.90 |                        |
| <i>ypzC</i>    | 2,432,330 | 2,432,566 | + | 21   | 28   | 0.73 | 22   | 22   | 1.00 |                        |
| <i>ypuC</i>    | 2,432,969 | 2,433,358 | - | 120  | 90   | 1.33 | 83   | 74   | 1.12 |                        |
| <i>ypuB</i>    | 2,433,336 | 2,433,539 | - | 82   | 85   | 0.96 | 79   | 67   | 1.19 |                        |
| <i>ypzD</i>    | 2,434,205 | 2,434,417 | + | 15   | 25   | 0.60 | 19   | 20   | 0.92 |                        |
| <i>ppiB</i>    | 2,434,553 | 2,434,984 | - | 1158 | 1053 | 1.10 | 1450 | 1384 | 1.05 |                        |
| <i>ypuA</i>    | 2,435,238 | 2,436,110 | + | 469  | 399  | 1.17 | 986  | 900  | 1.10 |                        |
| <i>lysA</i>    | 2,436,139 | 2,437,458 | - | 736  | 616  | 1.19 | 1305 | 1217 | 1.07 |                        |
| <i>spoVAF</i>  | 2,437,564 | 2,439,042 | - | 141  | 121  | 1.17 | 172  | 156  | 1.10 |                        |
| <i>spoVAE</i>  | 2,438,993 | 2,439,964 | - | 66   | 66   | 0.99 | 71   | 73   | 0.98 |                        |
| <i>spoVAD</i>  | 2,439,966 | 2,440,982 | - | 57   | 59   | 0.97 | 47   | 55   | 0.86 |                        |
| <i>spoVAC</i>  | 2,440,995 | 2,441,447 | - | 27   | 31   | 0.87 | 25   | 27   | 0.94 |                        |
| <i>spoVAB</i>  | 2,441,459 | 2,441,884 | - | 41   | 48   | 0.86 | 33   | 40   | 0.83 |                        |
| <i>spoVAA</i>  | 2,441,894 | 2,442,496 | - | 20   | 25   | 0.77 | 23   | 23   | 0.98 |                        |
| <i>sigF</i>    | 2,442,618 | 2,443,385 | - | 325  | 350  | 0.93 | 273  | 298  | 0.92 | AbrB regulon           |
| <i>spoIIAB</i> | 2,443,397 | 2,443,837 | - | 336  | 369  | 0.91 | 280  | 287  | 0.97 | AbrB regulon           |
| <i>spoIIAA</i> | 2,443,834 | 2,444,187 | - | 495  | 575  | 0.86 | 448  | 436  | 1.03 | Spo0A and AbrB regulon |
| <i>dacF</i>    | 2,444,283 | 2,445,452 | - | 67   | 70   | 0.95 | 54   | 66   | 0.82 | AbrB regulon           |
| <i>punA</i>    | 2,445,607 | 2,446,422 | - | 538  | 508  | 1.06 | 1054 | 1004 | 1.05 |                        |
| <i>drm</i>     | 2,446,435 | 2,447,619 | - | 616  | 537  | 1.15 | 920  | 914  | 1.01 |                        |
| <i>ripX</i>    | 2,447,780 | 2,448,670 | - | 595  | 471  | 1.26 | 677  | 743  | 0.91 |                        |
| <i>fur</i>     | 2,449,029 | 2,449,478 | - | 644  | 556  | 1.16 | 532  | 560  | 0.95 |                        |
| <i>spoIIM</i>  | 2,449,591 | 2,450,235 | - | 30   | 32   | 0.94 | 34   | 37   | 0.93 |                        |
| <i>yqkK</i>    | 2,450,336 | 2,450,551 | - | 80   | 78   | 1.03 | 103  | 93   | 1.11 |                        |
| <i>mleA</i>    | 2,450,651 | 2,451,970 | - | 226  | 262  | 0.86 | 261  | 299  | 0.87 |                        |
| <i>mleN</i>    | 2,451,988 | 2,453,394 | - | 134  | 165  | 0.81 | 169  | 190  | 0.89 |                        |
| <i>ansB</i>    | 2,453,535 | 2,454,962 | - | 254  | 230  | 1.10 | 294  | 291  | 1.01 |                        |
| <i>ansA</i>    | 2,455,007 | 2,455,996 | - | 274  | 260  | 1.05 | 388  | 378  | 1.03 |                        |
| <i>ansR</i>    | 2,456,178 | 2,456,528 | + | 157  | 149  | 1.06 | 120  | 154  | 0.78 |                        |
| <i>yqxK</i>    | 2,456,537 | 2,457,421 | - | 675  | 593  | 1.14 | 613  | 548  | 1.12 |                        |
| <i>nudF</i>    | 2,457,698 | 2,458,255 | - | 1068 | 918  | 1.16 | 1153 | 1054 | 1.09 |                        |
| <i>yqkF</i>    | 2,458,515 | 2,459,435 | + | 427  | 328  | 1.30 | 932  | 845  | 1.10 |                        |
| <i>yqkE</i>    | 2,459,467 | 2,459,691 | - | 40   | 41   | 0.98 | 51   | 53   | 0.97 |                        |
| <i>yqkD</i>    | 2,459,853 | 2,460,770 | + | 100  | 89   | 1.13 | 101  | 109  | 0.93 |                        |
| <i>yqkC</i>    | 2,460,810 | 2,461,049 | - | 165  | 191  | 0.86 | 719  | 796  | 0.90 |                        |
| <i>yqkB</i>    | 2,461,062 | 2,461,385 | - | 982  | 971  | 1.01 | 1327 | 1492 | 0.89 |                        |
| <i>yqkA</i>    | 2,461,382 | 2,462,413 | - | 540  | 553  | 0.98 | 1084 | 1295 | 0.84 |                        |
| <i>yqjZ</i>    | 2,462,406 | 2,462,750 | - | 419  | 482  | 0.87 | 812  | 1071 | 0.76 |                        |
| <i>yqjY</i>    | 2,462,760 | 2,463,230 | - | 370  | 398  | 0.93 | 609  | 853  | 0.71 |                        |
| <i>yqjX</i>    | 2,463,416 | 2,463,754 | - | 63   | 51   | 1.24 | 65   | 66   | 0.98 |                        |
| <i>yqjW</i>    | 2,463,751 | 2,464,989 | - | 90   | 87   | 1.03 | 85   | 89   | 0.95 |                        |
| <i>yqzH</i>    | 2,465,155 | 2,465,361 | + | 159  | 145  | 1.10 | 317  | 276  | 1.15 |                        |
| <i>yqjV</i>    | 2,465,910 | 2,467,142 | + | 163  | 149  | 1.10 | 187  | 186  | 1.01 |                        |
| <i>yqjU</i>    | 2,467,160 | 2,467,351 | + | 212  | 189  | 1.12 | 288  | 282  | 1.02 |                        |
| <i>yqjT</i>    | 2,467,348 | 2,467,734 | - | 514  | 502  | 1.02 | 753  | 730  | 1.03 |                        |
| <i>coaA</i>    | 2,467,738 | 2,468,697 | - | 438  | 454  | 0.96 | 561  | 575  | 0.98 |                        |
| <i>dsdA</i>    | 2,468,769 | 2,470,115 | - | 299  | 247  | 1.21 | 476  | 461  | 1.03 |                        |
| <i>yqjQ</i>    | 2,470,191 | 2,470,970 | - | 258  | 216  | 1.19 | 402  | 367  | 1.10 |                        |
| <i>yqjP</i>    | 2,470,976 | 2,471,935 | - | 162  | 147  | 1.10 | 185  | 197  | 0.94 |                        |
| <i>proI</i>    | 2,472,340 | 2,473,176 | + | 175  | 201  | 0.87 | 224  | 287  | 0.78 |                        |
| <i>yqjN</i>    | 2,473,217 | 2,474,860 | - | 313  | 279  | 1.12 | 349  | 307  | 1.14 |                        |
| <i>yqjM</i>    | 2,475,032 | 2,476,048 | + | 120  | 135  | 0.89 | 161  | 183  | 0.88 |                        |
| <i>yqjL</i>    | 2,476,158 | 2,476,919 | + | 171  | 242  | 0.71 | 343  | 383  | 0.90 |                        |
| <i>yqjK</i>    | 2,477,195 | 2,478,118 | - | 231  | 222  | 1.04 | 289  | 324  | 0.89 |                        |
| <i>zwf</i>     | 2,478,345 | 2,479,814 | + | 2006 | 1737 | 1.15 | 2161 | 2101 | 1.03 |                        |
| <i>yqjI</i>    | 2,479,937 | 2,481,346 | - | 2834 | 3121 | 0.91 | 2865 | 3204 | 0.89 |                        |
| <i>yqjH</i>    | 2,481,456 | 2,482,700 | - | 281  | 212  | 1.33 | 244  | 243  | 1.00 |                        |
| <i>yqzJ</i>    | 2,482,773 | 2,483,060 | + | 1025 | 1316 | 0.78 | 738  | 859  | 0.86 |                        |
| <i>yqjG</i>    | 2,483,091 | 2,483,918 | + | 770  | 867  | 0.89 | 565  | 631  | 0.90 |                        |
| <i>yqjF</i>    | 2,484,098 | 2,484,826 | + | 271  | 324  | 0.84 | 102  | 68   | 1.49 |                        |
| <i>yqjE</i>    | 2,484,867 | 2,485,982 | - | 1207 | 1141 | 1.06 | 1749 | 1777 | 0.98 |                        |
| <i>yqjD</i>    | 2,486,000 | 2,487,520 | - | 953  | 857  | 1.11 | 1187 | 1217 | 0.98 |                        |
| <i>yqjC</i>    | 2,487,517 | 2,487,939 | - | 62   | 64   | 0.98 | 51   | 60   | 0.85 |                        |
| <i>yqjB</i>    | 2,488,141 | 2,488,671 | - | 58   | 59   | 0.98 | 85   | 73   | 1.16 |                        |
| <i>yqjA</i>    | 2,488,723 | 2,489,691 | - | 266  | 244  | 1.09 | 370  | 410  | 0.90 |                        |
| <i>yqiZ</i>    | 2,489,762 | 2,490,484 | - | 513  | 517  | 0.99 | 1408 | 1820 | 0.77 |                        |
| <i>yqiY</i>    | 2,490,477 | 2,491,136 | - | 315  | 290  | 1.09 | 1000 | 1355 | 0.74 |                        |
| <i>yqiX</i>    | 2,491,217 | 2,491,984 | - | 442  | 353  | 1.25 | 1076 | 1789 | 0.60 |                        |
| <i>yqiW</i>    | 2,492,253 | 2,492,690 | - | 1018 | 987  | 1.03 | 1265 | 1427 | 0.89 |                        |
| <i>bmrU</i>    | 2,492,853 | 2,493,746 | + | 2326 | 1839 | 1.26 | 1073 | 399  | 2.69 |                        |
| <i>bmr</i>     | 2,493,847 | 2,495,016 | + | 2152 | 1502 | 1.43 | 497  | 284  | 1.75 |                        |

|                 |           |           |   |      |      |      |      |      |      |               |
|-----------------|-----------|-----------|---|------|------|------|------|------|------|---------------|
| <i>bmrR</i>     | 2,495,089 | 2,495,925 | + | 439  | 392  | 1.12 | 178  | 151  | 1.18 |               |
| <i>bkdB</i>     | 2,495,987 | 2,497,261 | - | 575  | 812  | 0.71 | 603  | 656  | 0.92 |               |
| <i>bkdAB</i>    | 2,497,284 | 2,498,267 | - | 898  | 1180 | 0.76 | 853  | 968  | 0.88 |               |
| <i>bkdAA</i>    | 2,498,281 | 2,499,273 | - | 835  | 1118 | 0.75 | 838  | 940  | 0.89 |               |
| <i>lpdV</i>     | 2,499,347 | 2,500,720 | - | 642  | 838  | 0.77 | 605  | 707  | 0.86 |               |
| <i>buk</i>      | 2,500,741 | 2,501,832 | - | 558  | 733  | 0.76 | 471  | 651  | 0.72 |               |
| <i>bcd</i>      | 2,501,851 | 2,502,945 | - | 872  | 1202 | 0.73 | 634  | 809  | 0.78 |               |
| <i>ptb</i>      | 2,502,957 | 2,503,856 | - | 657  | 904  | 0.73 | 328  | 509  | 0.64 |               |
| <i>bkdR</i>     | 2,503,981 | 2,506,059 | - | 619  | 532  | 1.16 | 440  | 419  | 1.05 |               |
| <i>yqzF</i>     | 2,506,212 | 2,506,448 | + | 434  | 449  | 0.97 | 356  | 474  | 0.75 |               |
| <i>yqiQ</i>     | 2,506,490 | 2,507,395 | - | 95   | 87   | 1.09 | 74   | 86   | 0.87 |               |
| <i>mmgE</i>     | 2,507,413 | 2,508,831 | - | 72   | 65   | 1.12 | 64   | 65   | 0.98 |               |
| <i>mmgD</i>     | 2,508,846 | 2,509,964 | - | 76   | 77   | 1.00 | 61   | 69   | 0.88 |               |
| <i>mmgC</i>     | 2,509,998 | 2,511,134 | - | 84   | 82   | 1.02 | 68   | 77   | 0.88 |               |
| <i>mmgB</i>     | 2,511,162 | 2,511,896 | - | 61   | 64   | 0.96 | 50   | 62   | 0.81 |               |
| <i>mmgA</i>     | 2,512,046 | 2,513,227 | - | 85   | 92   | 0.92 | 62   | 82   | 0.75 |               |
| <i>yqiK</i>     | 2,513,365 | 2,514,084 | - | 167  | 148  | 1.13 | 214  | 197  | 1.09 |               |
| <i>yqiI</i>     | 2,514,163 | 2,514,783 | - | 126  | 120  | 1.05 | 113  | 122  | 0.93 |               |
| <i>yqiH</i>     | 2,514,798 | 2,515,091 | - | 48   | 49   | 0.98 | 47   | 54   | 0.88 |               |
| <i>yqiG</i>     | 2,515,623 | 2,516,741 | + | 290  | 273  | 1.06 | 358  | 320  | 1.12 |               |
| <i>spo0A</i>    | 2,517,257 | 2,518,060 | - | 924  | 805  | 1.15 | 859  | 889  | 0.97 | Spo0A regulon |
| <i>spoIVB</i>   | 2,518,336 | 2,519,613 | - | 70   | 72   | 0.96 | 66   | 80   | 0.83 |               |
| <i>recN</i>     | 2,519,788 | 2,521,518 | - | 421  | 406  | 1.04 | 771  | 807  | 0.96 |               |
| <i>ahrC</i>     | 2,521,555 | 2,522,004 | - | 518  | 496  | 1.04 | 894  | 911  | 0.98 |               |
| <i>yqxC</i>     | 2,522,139 | 2,522,948 | - | 756  | 685  | 1.10 | 1284 | 1470 | 0.87 |               |
| <i>dxs</i>      | 2,522,945 | 2,524,846 | - | 1262 | 1195 | 1.06 | 1601 | 1686 | 0.95 |               |
| <i>yqiD</i>     | 2,525,093 | 2,525,911 | - | 538  | 419  | 1.29 | 881  | 791  | 1.11 |               |
| <i>yqiC</i>     | 2,525,901 | 2,526,065 | - | 903  | 644  | 1.40 | 1300 | 1366 | 0.95 |               |
| <i>yqiB</i>     | 2,526,151 | 2,527,497 | - | 547  | 366  | 1.50 | 763  | 746  | 1.02 |               |
| <i>folD</i>     | 2,527,635 | 2,528,486 | - | 1606 | 1362 | 1.18 | 1663 | 1732 | 0.96 |               |
| <i>nusB</i>     | 2,528,498 | 2,528,893 | - | 1815 | 1659 | 1.09 | 2108 | 2113 | 1.00 |               |
| <i>yqhY</i>     | 2,529,157 | 2,529,564 | - | 3103 | 3109 | 1.00 | 3252 | 3195 | 1.02 |               |
| <i>accC</i>     | 2,529,585 | 2,530,937 | - | 3699 | 3509 | 1.05 | 3436 | 3267 | 1.05 |               |
| <i>accB</i>     | 2,530,949 | 2,531,428 | - | 2011 | 1971 | 1.02 | 2202 | 2576 | 0.86 |               |
| <i>spoIIIAH</i> | 2,531,584 | 2,532,240 | - | 78   | 78   | 0.99 | 73   | 84   | 0.86 |               |
| <i>spoIIIAG</i> | 2,532,241 | 2,532,930 | - | 50   | 50   | 1.01 | 40   | 47   | 0.84 |               |
| <i>spoIIIAF</i> | 2,532,923 | 2,533,543 | - | 46   | 45   | 1.02 | 37   | 40   | 0.93 |               |
| <i>spoIIIAE</i> | 2,533,540 | 2,534,757 | - | 59   | 61   | 0.97 | 47   | 51   | 0.91 |               |
| <i>spoIIHAD</i> | 2,534,776 | 2,535,177 | - | 25   | 32   | 0.76 | 27   | 27   | 1.01 |               |
| <i>spoIIAAC</i> | 2,535,184 | 2,535,390 | - | 20   | 30   | 0.67 | 30   | 31   | 0.98 |               |
| <i>spoIIIAB</i> | 2,535,413 | 2,535,928 | - | 78   | 80   | 0.98 | 67   | 71   | 0.95 |               |
| <i>spoIIIAA</i> | 2,535,922 | 2,536,845 | - | 63   | 64   | 0.99 | 48   | 57   | 0.84 |               |
| <i>yqhV</i>     | 2,536,921 | 2,537,202 | - | 22   | 30   | 0.74 | 28   | 31   | 0.91 |               |
| <i>efp</i>      | 2,537,347 | 2,537,904 | - | 1558 | 1713 | 0.91 | 2347 | 2433 | 0.96 |               |
| <i>yqhT</i>     | 2,537,929 | 2,538,990 | - | 2308 | 2413 | 0.96 | 2661 | 2743 | 0.97 |               |
| <i>yqhS</i>     | 2,538,987 | 2,539,433 | - | 1648 | 1615 | 1.02 | 1613 | 1644 | 0.98 |               |
| <i>yqhR</i>     | 2,539,520 | 2,540,056 | - | 78   | 80   | 0.97 | 86   | 67   | 1.29 |               |
| <i>yqhQ</i>     | 2,540,283 | 2,541,239 | + | 991  | 916  | 1.08 | 443  | 443  | 1.00 |               |
| <i>yqhP</i>     | 2,541,279 | 2,541,674 | + | 1098 | 1190 | 0.92 | 388  | 461  | 0.84 |               |
| <i>yqhO</i>     | 2,541,671 | 2,542,546 | - | 64   | 64   | 0.99 | 58   | 68   | 0.86 |               |
| <i>mntR</i>     | 2,542,672 | 2,543,100 | - | 468  | 406  | 1.15 | 829  | 914  | 0.91 |               |
| <i>yqhM</i>     | 2,543,200 | 2,544,036 | - | 448  | 362  | 1.24 | 754  | 794  | 0.95 |               |
| <i>yqhL</i>     | 2,544,227 | 2,544,607 | + | 404  | 343  | 1.18 | 508  | 630  | 0.81 |               |
| <i>gcvPB</i>    | 2,544,642 | 2,546,108 | - | 633  | 795  | 0.80 | 637  | 717  | 0.89 |               |
| <i>gcvPA</i>    | 2,546,101 | 2,547,447 | - | 786  | 988  | 0.80 | 839  | 928  | 0.90 |               |
| <i>gcvT</i>     | 2,547,477 | 2,548,565 | - | 606  | 738  | 0.82 | 747  | 889  | 0.84 |               |
| <i>yqhH</i>     | 2,549,007 | 2,550,680 | + | 48   | 54   | 0.90 | 42   | 51   | 0.84 |               |
| <i>yqhG</i>     | 2,550,701 | 2,551,495 | + | 195  | 157  | 1.24 | 178  | 151  | 1.18 |               |
| <i>sinI</i>     | 2,551,678 | 2,551,851 | + | 351  | 310  | 1.13 | 376  | 567  | 0.66 | Spo0A regulon |
| <i>sinR</i>     | 2,551,885 | 2,552,220 | + | 244  | 283  | 0.86 | 366  | 428  | 0.85 |               |
| <i>tasA</i>     | 2,552,313 | 2,553,098 | - | 2398 | 427  | 5.61 | 2500 | 719  | 3.48 | AbrB regulon  |
| <i>sipW</i>     | 2,553,162 | 2,553,734 | - | 612  | 134  | 4.56 | 483  | 148  | 3.26 | AbrB regulon  |
| <i>yqxM</i>     | 2,553,718 | 2,554,479 | - | 197  | 58   | 3.40 | 159  | 66   | 2.41 | AbrB regulon  |
| <i>yqzG</i>     | 2,554,751 | 2,555,077 | + | 40   | 42   | 0.94 | 53   | 46   | 1.17 | AbrB regulon  |
| <i>yqzE</i>     | 2,555,060 | 2,555,299 | - | 88   | 126  | 0.70 | 250  | 399  | 0.63 |               |
| <i>comGG</i>    | 2,555,370 | 2,555,744 | - | 251  | 354  | 0.71 | 708  | 1063 | 0.67 |               |
| <i>comGF</i>    | 2,555,745 | 2,556,128 | - | 413  | 637  | 0.65 | 878  | 1296 | 0.68 |               |
| <i>comGE</i>    | 2,556,154 | 2,556,501 | - | 327  | 476  | 0.69 | 696  | 989  | 0.70 |               |
| <i>comGD</i>    | 2,556,485 | 2,556,916 | - | 331  | 482  | 0.69 | 665  | 915  | 0.73 |               |
| <i>comGC</i>    | 2,556,906 | 2,557,202 | - | 547  | 747  | 0.73 | 1064 | 1433 | 0.74 |               |
| <i>comGB</i>    | 2,557,216 | 2,558,187 | - | 581  | 718  | 0.81 | 797  | 1067 | 0.75 |               |
| <i>comGA</i>    | 2,558,240 | 2,559,310 | - | 799  | 1009 | 0.79 | 1318 | 1683 | 0.78 |               |
| <i>yqxL</i>     | 2,559,722 | 2,560,675 | - | 1557 | 1231 | 1.26 | 716  | 246  | 2.91 |               |
| <i>yqhB</i>     | 2,560,818 | 2,562,146 | + | 895  | 565  | 1.58 | 317  | 143  | 2.21 |               |
| <i>yqhA</i>     | 2,562,199 | 2,563,035 | - | 481  | 485  | 0.99 | 466  | 392  | 1.19 |               |
| <i>yqzZ</i>     | 2,563,259 | 2,563,639 | - | 6758 | 6656 | 1.02 | 4371 | 3814 | 1.15 |               |
| <i>yqzY</i>     | 2,563,871 | 2,564,116 | + | 1899 | 2489 | 0.76 | 1367 | 1843 | 0.74 |               |
| <i>yqzX</i>     | 2,564,156 | 2,564,791 | - | 907  | 990  | 0.92 | 1251 | 1243 | 1.01 |               |
| <i>yqzW</i>     | 2,564,949 | 2,565,122 | + | 959  | 1397 | 0.69 | 1456 | 1761 | 0.83 |               |
| <i>yqzV</i>     | 2,565,183 | 2,565,467 | - | 603  | 505  | 1.19 | 937  | 864  | 1.08 |               |
| <i>yqzU</i>     | 2,565,470 | 2,566,531 | - | 385  | 325  | 1.19 | 674  | 658  | 1.02 |               |
| <i>yqzT</i>     | 2,566,593 | 2,567,723 | - | 157  | 140  | 1.12 | 307  | 327  | 0.94 |               |
| <i>yqzS</i>     | 2,567,806 | 2,569,722 | - | 586  | 589  | 1.00 | 959  | 1149 | 0.83 |               |
| <i>glcK</i>     | 2,569,838 | 2,570,803 | - | 581  | 603  | 0.96 | 756  | 761  | 0.99 |               |
| <i>yqzO</i>     | 2,570,814 | 2,571,029 | - | 221  | 227  | 0.97 | 334  | 448  | 0.75 |               |
| <i>yqzP</i>     | 2,571,139 | 2,572,662 | - | 205  | 219  | 0.94 | 247  | 334  | 0.74 |               |
| <i>yqzQ</i>     | 2,572,752 | 2,572,925 | - | 368  | 376  | 0.98 | 381  | 500  | 0.76 |               |
| <i>yqzN</i>     | 2,572,992 | 2,573,555 | - | 262  | 289  | 0.91 | 300  | 353  | 0.85 |               |
| <i>rpmGA</i>    | 2,573,640 | 2,573,789 | - | 875  | 1130 | 0.77 | 1555 | 1402 | 1.11 |               |
| <i>yqzM</i>     | 2,573,873 | 2,574,952 | - | 116  | 105  | 1.11 | 120  | 128  | 0.94 |               |
| <i>yqzL</i>     | 2,574,949 | 2,575,419 | - | 87   | 93   | 0.94 | 91   | 94   | 0.97 |               |

|                |           |           |   |      |      |      |      |      |      |               |
|----------------|-----------|-----------|---|------|------|------|------|------|------|---------------|
| <i>yqzD</i>    | 2,575,599 | 2,575,952 | + | 1783 | 1470 | 1.21 | 1933 | 1805 | 1.07 | Spo0A regulon |
| <i>yqzC</i>    | 2,575,949 | 2,576,413 | + | 895  | 766  | 1.17 | 1165 | 1067 | 1.09 |               |
| <i>pstBB</i>   | 2,576,442 | 2,577,224 | - | 63   | 58   | 1.07 | 55   | 60   | 0.91 |               |
| <i>pstBA</i>   | 2,577,235 | 2,578,044 | - | 53   | 53   | 1.00 | 49   | 52   | 0.95 |               |
| <i>pstA</i>    | 2,578,065 | 2,578,949 | - | 54   | 53   | 1.02 | 47   | 51   | 0.91 |               |
| <i>pstC</i>    | 2,578,949 | 2,579,878 | - | 55   | 56   | 0.98 | 48   | 51   | 0.92 |               |
| <i>pstS</i>    | 2,579,947 | 2,580,849 | - | 43   | 49   | 0.88 | 38   | 40   | 0.95 |               |
| <i>pbpA</i>    | 2,581,003 | 2,583,153 | - | 1587 | 1315 | 1.21 | 1612 | 1544 | 1.04 |               |
| <i>yqgE</i>    | 2,583,267 | 2,584,559 | - | 74   | 74   | 0.99 | 55   | 62   | 0.88 |               |
| <i>sodA</i>    | 2,584,666 | 2,585,274 | - | 7473 | 7779 | 0.96 | 6025 | 5393 | 1.12 |               |
| <i>yqgC</i>    | 2,585,453 | 2,585,935 | - | 1619 | 1108 | 1.46 | 774  | 717  | 1.08 |               |
| <i>yqgB</i>    | 2,586,045 | 2,586,803 | + | 407  | 344  | 1.18 | 443  | 387  | 1.14 |               |
| <i>yqgA</i>    | 2,587,229 | 2,587,657 | - | 2605 | 2875 | 0.91 | 3280 | 3614 | 0.91 |               |
| <i>yqfZ</i>    | 2,587,934 | 2,588,233 | + | 46   | 47   | 0.98 | 46   | 58   | 0.80 |               |
| <i>yqfY</i>    | 2,588,356 | 2,589,489 | + | 702  | 671  | 1.05 | 798  | 872  | 0.92 |               |
| <i>yqfX</i>    | 2,589,515 | 2,589,904 | - | 81   | 91   | 0.89 | 78   | 94   | 0.83 |               |
| <i>yqfW</i>    | 2,590,037 | 2,590,618 | + | 454  | 374  | 1.22 | 610  | 577  | 1.06 |               |
| <i>zur</i>     | 2,590,661 | 2,591,098 | - | 362  | 385  | 0.94 | 260  | 275  | 0.94 |               |
| <i>yqfU</i>    | 2,591,236 | 2,592,117 | - | 605  | 559  | 1.08 | 589  | 701  | 0.84 |               |
| <i>yqfT</i>    | 2,592,233 | 2,592,487 | + | 38   | 38   | 1.01 | 36   | 31   | 1.14 |               |
| <i>yqfS</i>    | 2,592,514 | 2,593,407 | - | 1044 | 1283 | 0.81 | 925  | 1230 | 0.75 |               |
| <i>yqfR</i>    | 2,593,417 | 2,594,733 | - | 1148 | 1366 | 0.84 | 926  | 1235 | 0.75 |               |
| <i>yqfQ</i>    | 2,594,902 | 2,595,645 | + | 95   | 102  | 0.93 | 75   | 89   | 0.84 |               |
| <i>yqfP</i>    | 2,595,768 | 2,596,712 | + | 550  | 438  | 1.26 | 517  | 572  | 0.90 |               |
| <i>yqfO</i>    | 2,596,735 | 2,597,856 | - | 641  | 575  | 1.11 | 904  | 873  | 1.04 |               |
| <i>yqfN</i>    | 2,597,849 | 2,598,499 | - | 450  | 423  | 1.06 | 693  | 672  | 1.03 |               |
| <i>cccA</i>    | 2,598,756 | 2,599,118 | - | 909  | 963  | 0.94 | 792  | 877  | 0.90 | AbrB regulon  |
| <i>sigA</i>    | 2,599,447 | 2,600,562 | - | 2316 | 2484 | 0.93 | 2541 | 2689 | 0.95 | SigD regulon  |
| <i>dnaG</i>    | 2,600,761 | 2,602,572 | - | 1192 | 1257 | 0.95 | 1405 | 1692 | 0.83 | Spo0A regulon |
| <i>antE</i>    | 2,602,212 | 2,602,508 | + | 78   | 76   | 1.03 | 78   | 102  | 0.76 | AbrB regulon  |
| <i>yqxD</i>    | 2,602,606 | 2,603,196 | - | 1032 | 1043 | 0.99 | 1133 | 1351 | 0.84 |               |
| <i>yqfL</i>    | 2,603,354 | 2,604,166 | - | 473  | 482  | 0.98 | 695  | 793  | 0.88 |               |
| <i>yqzB</i>    | 2,604,192 | 2,604,830 | - | 567  | 644  | 0.88 | 799  | 845  | 0.95 |               |
| <i>glyS</i>    | 2,604,963 | 2,607,002 | - | 759  | 858  | 0.88 | 1329 | 1336 | 0.99 |               |
| <i>glyQ</i>    | 2,606,995 | 2,607,882 | - | 566  | 558  | 1.01 | 1012 | 1084 | 0.93 |               |
| <i>recO</i>    | 2,608,179 | 2,608,946 | - | 1098 | 909  | 1.21 | 1355 | 1633 | 0.83 |               |
| <i>era</i>     | 2,609,274 | 2,610,179 | - | 1565 | 1383 | 1.13 | 1898 | 2016 | 0.94 | Spo0A regulon |
| <i>cdd</i>     | 2,610,160 | 2,610,570 | - | 1188 | 1072 | 1.11 | 1474 | 1554 | 0.95 |               |
| <i>dgkA</i>    | 2,610,689 | 2,611,033 | - | 719  | 452  | 1.59 | 694  | 616  | 1.13 |               |
| <i>yqfG</i>    | 2,611,040 | 2,611,513 | - | 864  | 624  | 1.38 | 1034 | 844  | 1.22 |               |
| <i>yqfF</i>    | 2,611,514 | 2,613,649 | - | 885  | 642  | 1.38 | 883  | 789  | 1.12 |               |
| <i>phoH</i>    | 2,613,728 | 2,614,687 | - | 1943 | 1467 | 1.32 | 1650 | 1495 | 1.10 |               |
| <i>yqfD</i>    | 2,614,684 | 2,615,880 | - | 126  | 110  | 1.14 | 153  | 153  | 1.00 |               |
| <i>yqfC</i>    | 2,615,899 | 2,616,180 | - | 63   | 65   | 0.97 | 140  | 144  | 0.98 |               |
| <i>yqfB</i>    | 2,616,237 | 2,616,656 | - | 2263 | 2411 | 0.94 | 2980 | 3330 | 0.89 |               |
| <i>yqfA</i>    | 2,616,681 | 2,617,676 | - | 2300 | 2358 | 0.98 | 3188 | 3405 | 0.94 |               |
| <i>yqeZ</i>    | 2,617,698 | 2,619,011 | - | 1944 | 1774 | 1.10 | 2343 | 2648 | 0.88 |               |
| <i>yqeY</i>    | 2,619,142 | 2,619,588 | - | 3264 | 3710 | 0.88 | 3226 | 3401 | 0.95 |               |
| <i>rpsU</i>    | 2,619,603 | 2,619,776 | - | 4876 | 5904 | 0.83 | 5338 | 5562 | 0.96 |               |
| <i>yqeW</i>    | 2,619,940 | 2,620,872 | + | 51   | 56   | 0.91 | 48   | 51   | 0.94 |               |
| <i>yqeV</i>    | 2,620,909 | 2,622,264 | - | 643  | 565  | 1.14 | 1301 | 1354 | 0.96 |               |
| <i>yqeU</i>    | 2,622,264 | 2,623,034 | - | 384  | 287  | 1.34 | 715  | 813  | 0.88 |               |
| <i>yqeT</i>    | 2,623,057 | 2,623,992 | - | 507  | 409  | 1.24 | 947  | 1075 | 0.88 |               |
| <i>dnaJ</i>    | 2,624,017 | 2,625,135 | - | 1042 | 1005 | 1.04 | 1720 | 1740 | 0.99 |               |
| <i>dnaK</i>    | 2,625,335 | 2,627,170 | - | 3272 | 3042 | 1.08 | 3852 | 3540 | 1.09 |               |
| <i>grpE</i>    | 2,627,194 | 2,627,757 | - | 2821 | 2361 | 1.19 | 3169 | 3023 | 1.05 |               |
| <i>hrcA</i>    | 2,627,829 | 2,628,860 | - | 899  | 784  | 1.15 | 883  | 733  | 1.21 |               |
| <i>hemN</i>    | 2,628,980 | 2,630,080 | - | 237  | 212  | 1.12 | 354  | 339  | 1.04 |               |
| <i>lepA</i>    | 2,630,133 | 2,631,971 | - | 693  | 592  | 1.17 | 900  | 996  | 0.90 |               |
| <i>yqxA</i>    | 2,632,105 | 2,632,443 | - | 52   | 48   | 1.09 | 49   | 50   | 0.98 |               |
| <i>spoIIP</i>  | 2,632,460 | 2,633,665 | - | 93   | 85   | 1.09 | 80   | 100  | 0.80 |               |
| <i>gpr</i>     | 2,633,728 | 2,634,834 | - | 86   | 83   | 1.03 | 78   | 87   | 0.89 |               |
| <i>rpsT</i>    | 2,635,038 | 2,635,304 | + | 584  | 781  | 0.75 | 787  | 734  | 1.07 |               |
| <i>yqeN</i>    | 2,635,319 | 2,636,362 | - | 253  | 250  | 1.01 | 336  | 429  | 0.78 |               |
| <i>comEC</i>   | 2,636,766 | 2,639,096 | - | 105  | 125  | 0.84 | 147  | 242  | 0.61 |               |
| <i>comEB</i>   | 2,639,100 | 2,639,669 | - | 340  | 361  | 0.94 | 465  | 650  | 0.72 |               |
| <i>comEA</i>   | 2,639,736 | 2,640,353 | - | 286  | 307  | 0.93 | 405  | 669  | 0.60 |               |
| <i>comER</i>   | 2,640,437 | 2,641,258 | + | 79   | 76   | 1.04 | 56   | 61   | 0.92 |               |
| <i>yqeM</i>    | 2,641,324 | 2,642,067 | - | 687  | 513  | 1.34 | 1206 | 1050 | 1.15 |               |
| <i>yqeL</i>    | 2,642,064 | 2,642,420 | - | 1091 | 830  | 1.31 | 1944 | 1781 | 1.09 |               |
| <i>yqeK</i>    | 2,642,438 | 2,642,998 | - | 639  | 461  | 1.39 | 1250 | 1102 | 1.13 |               |
| <i>yqeJ</i>    | 2,642,988 | 2,643,557 | - | 927  | 639  | 1.45 | 1444 | 1319 | 1.10 |               |
| <i>yqeI</i>    | 2,643,569 | 2,643,859 | - | 962  | 726  | 1.33 | 1935 | 1726 | 1.12 |               |
| <i>aroD</i>    | 2,643,853 | 2,644,695 | - | 806  | 604  | 1.33 | 1554 | 1432 | 1.09 |               |
| <i>yqeH</i>    | 2,644,713 | 2,645,813 | - | 485  | 345  | 1.41 | 986  | 929  | 1.06 |               |
| <i>yqeG</i>    | 2,645,817 | 2,646,335 | - | 343  | 255  | 1.35 | 536  | 621  | 0.86 |               |
| <i>sda</i>     | 2,646,679 | 2,646,837 | + | 180  | 123  | 1.46 | 246  | 464  | 0.53 |               |
| <i>yqeF</i>    | 2,647,143 | 2,647,874 | - | 909  | 417  | 2.18 | 372  | 184  | 2.02 |               |
| <i>cwlH</i>    | 2,648,126 | 2,648,878 | - | 151  | 130  | 1.16 | 154  | 124  | 1.24 |               |
| <i>yqeD</i>    | 2,649,065 | 2,649,691 | + | 97   | 62   | 1.57 | 75   | 71   | 1.07 |               |
| <i>yqeC</i>    | 2,649,710 | 2,650,603 | - | 97   | 93   | 1.04 | 81   | 83   | 0.98 |               |
| <i>yqeB</i>    | 2,650,855 | 2,651,580 | + | 404  | 289  | 1.40 | 616  | 453  | 1.36 |               |
| <i>nucB</i>    | 2,651,613 | 2,652,023 | - | 64   | 72   | 0.90 | 62   | 72   | 0.86 |               |
| <i>spoIVCB</i> | 2,652,219 | 2,652,689 | + | 51   | 52   | 0.97 | 72   | 67   | 1.07 |               |
| <i>spoIVCA</i> | 2,652,597 | 2,654,099 | - | 68   | 66   | 1.02 | 89   | 97   | 0.91 |               |
| <i>arsC</i>    | 2,654,548 | 2,654,967 | - | 180  | 193  | 0.93 | 235  | 243  | 0.97 |               |
| <i>arsB</i>    | 2,654,979 | 2,656,019 | - | 131  | 138  | 0.95 | 134  | 148  | 0.91 |               |
| <i>yqcK</i>    | 2,656,042 | 2,656,482 | - | 50   | 59   | 0.85 | 59   | 69   | 0.85 |               |
| <i>arsR</i>    | 2,656,543 | 2,656,860 | - | 68   | 74   | 0.93 | 96   | 113  | 0.85 |               |
| <i>yqcI</i>    | 2,657,232 | 2,657,996 | - | 30   | 35   | 0.87 | 29   | 35   | 0.83 |               |
| <i>rapE</i>    | 2,658,440 | 2,659,567 | + | 138  | 152  | 0.91 | 183  | 167  | 1.10 |               |



|                |           |           |   |      |      |      |      |      |      |                        |
|----------------|-----------|-----------|---|------|------|------|------|------|------|------------------------|
| <i>yqzI</i>    | 2,659,801 | 2,659,959 | + | 87   | 102  | 0.85 | 98   | 98   | 1.00 |                        |
| <i>yqcG</i>    | 2,660,329 | 2,661,924 | + | 625  | 512  | 1.22 | 726  | 704  | 1.03 | Spo0A and AbrB regulon |
| <i>yqcF</i>    | 2,661,939 | 2,662,517 | + | 444  | 328  | 1.36 | 517  | 461  | 1.12 |                        |
| <i>yqxJ</i>    | 2,662,778 | 2,663,140 | - | 602  | 533  | 1.13 | 759  | 627  | 1.21 | AbrB regulon           |
| <i>yqxI</i>    | 2,663,156 | 2,663,635 | - | 1572 | 1362 | 1.15 | 1633 | 1391 | 1.17 | Spo0A and AbrB regulon |
| <i>cwIA</i>    | 2,663,800 | 2,664,618 | - | 56   | 56   | 0.99 | 62   | 60   | 1.04 |                        |
| <i>yqxH</i>    | 2,664,663 | 2,665,085 | - | 30   | 33   | 0.91 | 29   | 28   | 1.04 |                        |
| <i>yqxG</i>    | 2,665,130 | 2,666,023 | - | 26   | 30   | 0.88 | 27   | 29   | 0.95 |                        |
| <i>yqcE</i>    | 2,666,111 | 2,666,275 | - | 28   | 29   | 0.99 | 35   | 29   | 1.21 |                        |
| <i>yqcD</i>    | 2,666,272 | 2,666,607 | - | 26   | 32   | 0.81 | 29   | 26   | 1.15 |                        |
| <i>yqcC</i>    | 2,666,617 | 2,667,717 | - | 57   | 50   | 1.14 | 75   | 60   | 1.25 |                        |
| <i>yqcB</i>    | 2,667,720 | 2,667,992 | - | 30   | 38   | 0.78 | 29   | 31   | 0.94 |                        |
| <i>yqaA</i>    | 2,667,989 | 2,668,567 | - | 53   | 50   | 1.06 | 35   | 41   | 0.86 |                        |
| <i>yqbT</i>    | 2,668,551 | 2,669,597 | - | 63   | 73   | 0.86 | 56   | 69   | 0.81 |                        |
| <i>yqbS</i>    | 2,669,590 | 2,670,015 | - | 39   | 48   | 0.82 | 34   | 37   | 0.93 |                        |
| <i>yqbR</i>    | 2,670,028 | 2,670,291 | - | 23   | 29   | 0.78 | 28   | 31   | 0.92 |                        |
| <i>yqbQ</i>    | 2,670,288 | 2,671,268 | - | 61   | 54   | 1.13 | 54   | 52   | 1.04 |                        |
| <i>yqbP</i>    | 2,671,281 | 2,671,940 | - | 64   | 48   | 1.34 | 78   | 68   | 1.16 |                        |
| <i>yqbO</i>    | 2,671,933 | 2,676,690 | - | 76   | 70   | 1.07 | 70   | 72   | 0.97 |                        |
| <i>yqbN</i>    | 2,676,872 | 2,677,321 | - | 30   | 33   | 0.89 | 34   | 33   | 1.04 |                        |
| <i>yqdB</i>    | 2,677,467 | 2,677,646 | + | 33   | 39   | 0.84 | 121  | 163  | 0.74 |                        |
| <i>yqbM</i>    | 2,678,369 | 2,678,812 | - | 141  | 89   | 1.59 | 74   | 56   | 1.31 |                        |
| <i>yqbL</i>    | 2,678,815 | 2,679,219 | - | 145  | 80   | 1.80 | 66   | 43   | 1.52 |                        |
| <i>yqbK</i>    | 2,679,297 | 2,680,214 | - | 60   | 63   | 0.95 | 64   | 69   | 0.93 |                        |
| <i>yqbJ</i>    | 2,680,403 | 2,680,840 | - | 36   | 42   | 0.87 | 40   | 45   | 0.89 |                        |
| <i>yqbI</i>    | 2,680,853 | 2,681,356 | - | 55   | 60   | 0.90 | 52   | 51   | 1.01 |                        |
| <i>yqbH</i>    | 2,681,353 | 2,681,715 | - | 31   | 35   | 0.89 | 37   | 37   | 1.01 |                        |
| <i>yqbG</i>    | 2,681,712 | 2,682,107 | - | 60   | 75   | 0.80 | 69   | 74   | 0.93 |                        |
| <i>yqbF</i>    | 2,682,111 | 2,682,422 | - | 33   | 39   | 0.84 | 42   | 38   | 1.10 |                        |
| <i>yqbE</i>    | 2,682,433 | 2,683,368 | - | 41   | 41   | 0.98 | 50   | 46   | 1.10 |                        |
| <i>yqbD</i>    | 2,683,387 | 2,684,355 | - | 74   | 78   | 0.95 | 72   | 82   | 0.87 |                        |
| <i>yqbC</i>    | 2,684,388 | 2,685,041 | - | 148  | 166  | 0.89 | 176  | 185  | 0.95 |                        |
| <i>yqbB</i>    | 2,685,082 | 2,685,999 | - | 63   | 55   | 1.14 | 64   | 61   | 1.05 |                        |
| <i>yqaA</i>    | 2,685,996 | 2,687,528 | - | 54   | 52   | 1.04 | 53   | 53   | 1.02 |                        |
| <i>yqaT</i>    | 2,687,532 | 2,688,827 | - | 49   | 56   | 0.87 | 46   | 58   | 0.80 |                        |
| <i>yqaS</i>    | 2,688,820 | 2,689,539 | - | 66   | 94   | 0.71 | 73   | 85   | 0.86 |                        |
| <i>yqaR</i>    | 2,689,607 | 2,690,071 | - | 165  | 207  | 0.80 | 262  | 321  | 0.81 |                        |
| <i>yqaQ</i>    | 2,690,215 | 2,690,670 | - | 34   | 47   | 0.73 | 38   | 42   | 0.89 |                        |
| <i>yqaP</i>    | 2,690,868 | 2,691,797 | + | 2016 | 1885 | 1.07 | 2069 | 2094 | 0.99 | AbrB regulon           |
| <i>yqaO</i>    | 2,691,871 | 2,692,077 | - | 26   | 29   | 0.88 | 25   | 22   | 1.16 |                        |
| <i>yqaN</i>    | 2,692,159 | 2,692,587 | - | 47   | 51   | 0.92 | 53   | 51   | 1.04 |                        |
| <i>yqaM</i>    | 2,692,823 | 2,693,764 | - | 34   | 37   | 0.92 | 32   | 35   | 0.94 |                        |
| <i>yqaL</i>    | 2,693,646 | 2,694,347 | - | 62   | 66   | 0.95 | 47   | 52   | 0.89 |                        |
| <i>yqaK</i>    | 2,694,399 | 2,695,253 | - | 47   | 46   | 1.02 | 37   | 43   | 0.87 |                        |
| <i>yqaJ</i>    | 2,695,256 | 2,696,215 | - | 24   | 28   | 0.85 | 25   | 28   | 0.92 |                        |
| <i>yqaI</i>    | 2,696,321 | 2,696,515 | - | 25   | 35   | 0.71 | 26   | 22   | 1.19 |                        |
| <i>yqaH</i>    | 2,696,645 | 2,696,902 | - | 27   | 30   | 0.88 | 22   | 27   | 0.81 |                        |
| <i>yqaG</i>    | 2,696,899 | 2,697,468 | - | 31   | 38   | 0.82 | 30   | 35   | 0.87 |                        |
| <i>yqaA</i>    | 2,697,542 | 2,697,682 | - | 41   | 42   | 0.97 | 52   | 51   | 1.02 |                        |
| <i>yqaF</i>    | 2,697,712 | 2,697,942 | - | 19   | 26   | 0.76 | 22   | 23   | 0.96 |                        |
| <i>yqaE</i>    | 2,698,119 | 2,698,469 | + | 258  | 250  | 1.03 | 234  | 247  | 0.95 |                        |
| <i>yqaD</i>    | 2,698,736 | 2,698,903 | - | 23   | 29   | 0.78 | 35   | 34   | 1.04 |                        |
| <i>yqaC</i>    | 2,699,259 | 2,699,795 | - | 90   | 84   | 1.06 | 81   | 70   | 1.15 |                        |
| <i>yqaB</i>    | 2,700,064 | 2,700,582 | + | 30   | 36   | 0.82 | 35   | 38   | 0.92 |                        |
| <i>spoIIIc</i> | 2,700,564 | 2,700,980 | + | 83   | 81   | 1.03 | 61   | 82   | 0.74 |                        |
| <i>yrkS</i>    | 2,701,205 | 2,701,369 | - | 41   | 44   | 0.93 | 36   | 49   | 0.74 |                        |
| <i>yrkR</i>    | 2,701,914 | 2,702,333 | - | 132  | 73   | 1.80 | 96   | 70   | 1.37 |                        |
| <i>yrkQ</i>    | 2,702,376 | 2,703,674 | - | 189  | 128  | 1.47 | 156  | 131  | 1.19 |                        |
| <i>yrkP</i>    | 2,703,661 | 2,704,356 | - | 92   | 100  | 0.93 | 99   | 93   | 1.06 |                        |
| <i>yrkO</i>    | 2,704,624 | 2,705,841 | + | 90   | 75   | 1.20 | 82   | 80   | 1.02 |                        |
| <i>yrkN</i>    | 2,706,353 | 2,706,910 | + | 96   | 84   | 1.15 | 96   | 93   | 1.03 |                        |
| <i>yrkL</i>    | 2,707,401 | 2,707,925 | - | 607  | 507  | 1.20 | 530  | 513  | 1.03 |                        |
| <i>yrkK</i>    | 2,708,169 | 2,708,645 | - | 90   | 93   | 0.97 | 82   | 91   | 0.90 |                        |
| <i>yrkJ</i>    | 2,709,228 | 2,710,013 | - | 35   | 37   | 0.96 | 37   | 33   | 1.10 |                        |
| <i>yrkI</i>    | 2,710,074 | 2,710,301 | - | 30   | 30   | 1.00 | 43   | 40   | 1.07 |                        |
| <i>yrkH</i>    | 2,710,335 | 2,711,222 | - | 82   | 79   | 1.04 | 80   | 93   | 0.86 |                        |
| <i>yrkF</i>    | 2,711,803 | 2,712,360 | - | 55   | 57   | 0.96 | 55   | 55   | 1.00 |                        |
| <i>yrkE</i>    | 2,712,546 | 2,713,028 | - | 39   | 45   | 0.87 | 35   | 36   | 0.98 |                        |
| <i>yrkD</i>    | 2,713,175 | 2,713,366 | - | 257  | 303  | 0.85 | 362  | 477  | 0.76 |                        |
| <i>yrkC</i>    | 2,714,159 | 2,714,719 | - | 155  | 129  | 1.20 | 202  | 226  | 0.89 |                        |
| <i>yrkB</i>    | 2,714,945 | 2,715,091 | - | 75   | 57   | 1.31 | 102  | 80   | 1.27 |                        |
| <i>bltR</i>    | 2,715,261 | 2,716,082 | - | 50   | 54   | 0.93 | 70   | 79   | 0.89 |                        |
| <i>bltI</i>    | 2,716,199 | 2,717,401 | + | 42   | 49   | 0.87 | 42   | 48   | 0.88 |                        |
| <i>bltD</i>    | 2,717,570 | 2,718,028 | + | 27   | 34   | 0.81 | 40   | 42   | 0.95 |                        |
| <i>yrkA</i>    | 2,718,185 | 2,719,489 | - | 413  | 514  | 0.80 | 251  | 328  | 0.76 |                        |
| <i>yrdR</i>    | 2,719,913 | 2,720,878 | - | 34   | 37   | 0.92 | 31   | 31   | 0.98 |                        |
| <i>yrdQ</i>    | 2,721,004 | 2,721,870 | + | 168  | 159  | 1.06 | 197  | 182  | 1.08 |                        |
| <i>trkA</i>    | 2,721,993 | 2,723,030 | - | 326  | 467  | 0.70 | 123  | 173  | 0.71 |                        |
| <i>czcD</i>    | 2,723,118 | 2,724,053 | - | 520  | 861  | 0.60 | 242  | 303  | 0.80 |                        |
| <i>yrdN</i>    | 2,724,340 | 2,724,729 | - | 41   | 42   | 0.98 | 46   | 41   | 1.11 |                        |
| <i>glrR</i>    | 2,725,063 | 2,725,953 | + | 60   | 62   | 0.98 | 85   | 93   | 0.91 |                        |
| <i>yrdK</i>    | 2,726,111 | 2,726,428 | - | 91   | 90   | 1.01 | 142  | 143  | 0.99 |                        |
| <i>brnQ</i>    | 2,726,386 | 2,727,708 | - | 107  | 105  | 1.02 | 138  | 148  | 0.93 |                        |
| <i>azlD</i>    | 2,727,873 | 2,728,205 | - | 151  | 144  | 1.05 | 226  | 211  | 1.07 |                        |
| <i>azlC</i>    | 2,728,202 | 2,728,966 | - | 124  | 118  | 1.05 | 160  | 170  | 0.94 |                        |
| <i>azlB</i>    | 2,728,979 | 2,729,452 | - | 110  | 108  | 1.01 | 163  | 148  | 1.10 |                        |
| <i>yrdF</i>    | 2,729,786 | 2,730,061 | - | 33   | 34   | 0.96 | 46   | 38   | 1.20 |                        |
| <i>cypA</i>    | 2,730,333 | 2,731,565 | - | 68   | 56   | 1.22 | 94   | 81   | 1.16 |                        |
| <i>yrdC</i>    | 2,732,206 | 2,732,769 | - | 189  | 189  | 1.00 | 355  | 451  | 0.79 |                        |
| <i>yrdB</i>    | 2,732,998 | 2,733,369 | - | 45   | 56   | 0.81 | 82   | 99   | 0.83 |                        |
| <i>yrdA</i>    | 2,734,179 | 2,734,682 | - | 572  | 385  | 1.48 | 366  | 398  | 0.92 |                        |

|              |           |           |   |      |      |      |      |      |      |               |
|--------------|-----------|-----------|---|------|------|------|------|------|------|---------------|
| <i>aadK</i>  | 2,734,908 | 2,735,762 | - | 288  | 254  | 1.13 | 266  | 309  | 0.86 |               |
| <i>yrpB</i>  | 2,736,141 | 2,737,184 | + | 474  | 428  | 1.11 | 366  | 322  | 1.14 |               |
| <i>yrpC</i>  | 2,737,534 | 2,738,331 | + | 62   | 69   | 0.89 | 67   | 68   | 0.98 |               |
| <i>yrpD</i>  | 2,738,712 | 2,739,419 | + | 2048 | 2392 | 0.86 | 2447 | 2605 | 0.94 | AbrB regulon  |
| <i>yrpE</i>  | 2,740,583 | 2,741,338 | - | 32   | 33   | 0.97 | 48   | 46   | 1.04 |               |
| <i>sigZ</i>  | 2,741,470 | 2,742,000 | - | 66   | 61   | 1.08 | 75   | 68   | 1.09 |               |
| <i>yrpG</i>  | 2,742,165 | 2,743,115 | + | 100  | 95   | 1.05 | 92   | 93   | 0.99 |               |
| <i>yraO</i>  | 2,743,389 | 2,744,705 | - | 141  | 176  | 0.80 | 167  | 206  | 0.81 |               |
| <i>yraN</i>  | 2,744,820 | 2,745,689 | - | 206  | 256  | 0.80 | 285  | 329  | 0.87 |               |
| <i>yraM</i>  | 2,745,834 | 2,746,937 | + | 56   | 65   | 0.86 | 64   | 68   | 0.94 |               |
| <i>csn</i>   | 2,747,210 | 2,748,043 | - | 1434 | 1088 | 1.32 | 1082 | 878  | 1.23 | AbrB regulon  |
| <i>yraL</i>  | 2,748,486 | 2,748,749 | + | 602  | 445  | 1.35 | 609  | 627  | 0.97 |               |
| <i>yraK</i>  | 2,748,886 | 2,749,575 | + | 122  | 116  | 1.06 | 121  | 122  | 0.99 |               |
| <i>yraJ</i>  | 2,750,108 | 2,750,470 | - | 443  | 299  | 1.48 | 316  | 236  | 1.34 |               |
| <i>yraI</i>  | 2,750,517 | 2,750,951 | - | 1004 | 719  | 1.40 | 884  | 626  | 1.41 |               |
| <i>yraH</i>  | 2,751,392 | 2,751,778 | - | 263  | 194  | 1.35 | 194  | 181  | 1.07 |               |
| <i>yraG</i>  | 2,752,027 | 2,752,272 | + | 58   | 43   | 1.35 | 39   | 29   | 1.34 |               |
| <i>yraF</i>  | 2,752,290 | 2,752,658 | + | 73   | 60   | 1.20 | 53   | 42   | 1.26 |               |
| <i>adhB</i>  | 2,752,677 | 2,753,813 | + | 85   | 71   | 1.20 | 68   | 52   | 1.30 |               |
| <i>yraE</i>  | 2,753,832 | 2,754,029 | + | 114  | 78   | 1.47 | 77   | 55   | 1.40 |               |
| <i>yraD</i>  | 2,754,045 | 2,754,344 | + | 59   | 49   | 1.21 | 53   | 38   | 1.42 |               |
| <i>yraB</i>  | 2,754,607 | 2,755,029 | - | 98   | 88   | 1.11 | 85   | 86   | 0.99 |               |
| <i>adhA</i>  | 2,755,537 | 2,756,586 | + | 125  | 122  | 1.03 | 132  | 117  | 1.13 |               |
| <i>yraA</i>  | 2,756,717 | 2,757,226 | + | 1452 | 1728 | 0.84 | 1743 | 1918 | 0.91 |               |
| <i>sacC</i>  | 2,757,268 | 2,759,301 | - | 205  | 131  | 1.56 | 131  | 113  | 1.15 |               |
| <i>levG</i>  | 2,759,458 | 2,760,285 | - | 475  | 247  | 1.92 | 319  | 224  | 1.43 |               |
| <i>levF</i>  | 2,760,306 | 2,761,115 | - | 474  | 246  | 1.93 | 328  | 214  | 1.54 |               |
| <i>levE</i>  | 2,761,132 | 2,761,620 | - | 480  | 244  | 1.97 | 362  | 241  | 1.50 |               |
| <i>levD</i>  | 2,761,620 | 2,762,060 | - | 434  | 229  | 1.89 | 300  | 193  | 1.56 |               |
| <i>levR</i>  | 2,762,250 | 2,765,066 | - | 177  | 113  | 1.56 | 194  | 131  | 1.48 |               |
| <i>aapA</i>  | 2,765,783 | 2,767,162 | + | 74   | 71   | 1.04 | 79   | 84   | 0.94 |               |
| <i>yrhP</i>  | 2,767,269 | 2,767,901 | - | 88   | 213  | 0.41 | 62   | 157  | 0.39 |               |
| <i>yrhO</i>  | 2,768,054 | 2,768,881 | + | 149  | 130  | 1.14 | 176  | 192  | 0.92 |               |
| <i>sigV</i>  | 2,769,077 | 2,769,577 | + | 34   | 39   | 0.86 | 37   | 42   | 0.89 |               |
| <i>yrhM</i>  | 2,769,577 | 2,770,434 | + | 50   | 52   | 0.96 | 53   | 57   | 0.93 |               |
| <i>yrhL</i>  | 2,770,545 | 2,772,449 | + | 82   | 76   | 1.08 | 97   | 93   | 1.04 |               |
| <i>yrhK</i>  | 2,772,583 | 2,772,873 | + | 274  | 111  | 2.47 | 203  | 80   | 2.53 |               |
| <i>yrhJ</i>  | 2,773,117 | 2,776,281 | - | 211  | 218  | 0.97 | 402  | 330  | 1.22 |               |
| <i>yrhI</i>  | 2,776,297 | 2,776,881 | - | 84   | 75   | 1.12 | 141  | 114  | 1.23 |               |
| <i>yrhH</i>  | 2,777,104 | 2,777,646 | - | 69   | 76   | 0.90 | 95   | 106  | 0.90 |               |
| <i>yrzI</i>  | 2,778,150 | 2,778,299 | - | 1688 | 2162 | 0.78 | 732  | 847  | 0.86 | AbrB regulon  |
| <i>yrhG</i>  | 2,778,689 | 2,779,489 | - | 175  | 152  | 1.15 | 226  | 187  | 1.21 |               |
| <i>yrhF</i>  | 2,779,752 | 2,780,120 | - | 166  | 151  | 1.10 | 284  | 259  | 1.09 |               |
| <i>yrhE</i>  | 2,780,436 | 2,783,378 | + | 142  | 146  | 0.97 | 120  | 134  | 0.89 |               |
| <i>yrhD</i>  | 2,783,397 | 2,783,879 | + | 91   | 99   | 0.92 | 65   | 73   | 0.90 |               |
| <i>yrhC</i>  | 2,783,915 | 2,784,145 | - | 59   | 64   | 0.92 | 48   | 45   | 1.07 |               |
| <i>yrhB</i>  | 2,784,228 | 2,785,367 | - | 255  | 256  | 0.99 | 306  | 380  | 0.81 |               |
| <i>yrhA</i>  | 2,785,369 | 2,786,292 | - | 287  | 262  | 1.10 | 338  | 425  | 0.80 |               |
| <i>mtn</i>   | 2,786,357 | 2,787,052 | - | 870  | 815  | 1.07 | 1140 | 1216 | 0.94 |               |
| <i>yrzT</i>  | 2,787,073 | 2,787,714 | - | 411  | 356  | 1.15 | 423  | 552  | 0.77 |               |
| <i>yrzA</i>  | 2,787,907 | 2,788,110 | + | 263  | 247  | 1.07 | 372  | 381  | 0.98 |               |
| <i>yrzS</i>  | 2,788,147 | 2,788,848 | - | 1082 | 1014 | 1.07 | 1130 | 1080 | 1.05 |               |
| <i>yrzR</i>  | 2,788,913 | 2,790,667 | - | 114  | 111  | 1.03 | 134  | 150  | 0.90 |               |
| <i>greA</i>  | 2,790,721 | 2,791,194 | - | 1018 | 1035 | 0.98 | 1914 | 2007 | 0.95 |               |
| <i>udk</i>   | 2,791,445 | 2,792,080 | - | 367  | 326  | 1.13 | 763  | 783  | 0.97 |               |
| <i>yrzO</i>  | 2,792,087 | 2,793,355 | - | 481  | 405  | 1.19 | 985  | 948  | 1.04 |               |
| <i>yrzN</i>  | 2,793,374 | 2,794,303 | - | 488  | 394  | 1.24 | 857  | 914  | 0.94 |               |
| <i>yrzM</i>  | 2,794,309 | 2,794,962 | - | 291  | 259  | 1.13 | 574  | 627  | 0.92 |               |
| <i>yrzL</i>  | 2,795,114 | 2,796,196 | - | 692  | 544  | 1.27 | 976  | 805  | 1.21 | Spo0A regulon |
| <i>yrzB</i>  | 2,796,327 | 2,796,608 | - | 3241 | 3391 | 0.96 | 2934 | 2864 | 1.02 |               |
| <i>yrzK</i>  | 2,796,626 | 2,797,042 | - | 1986 | 1805 | 1.10 | 2102 | 1922 | 1.09 |               |
| <i>yrzL</i>  | 2,797,050 | 2,797,316 | - | 1794 | 1576 | 1.14 | 1864 | 1715 | 1.09 |               |
| <i>alaS</i>  | 2,797,401 | 2,800,037 | - | 1214 | 996  | 1.22 | 1691 | 1491 | 1.13 |               |
| <i>yrzI</i>  | 2,800,368 | 2,801,429 | - | 67   | 63   | 1.07 | 58   | 66   | 0.89 |               |
| <i>glnQ</i>  | 2,801,585 | 2,802,313 | + | 118  | 118  | 1.00 | 107  | 121  | 0.89 |               |
| <i>glnH</i>  | 2,802,335 | 2,803,156 | + | 77   | 55   | 1.39 | 38   | 39   | 0.97 |               |
| <i>glnM</i>  | 2,803,217 | 2,803,867 | + | 74   | 66   | 1.13 | 45   | 54   | 0.84 |               |
| <i>glnP</i>  | 2,803,884 | 2,804,540 | + | 43   | 36   | 1.21 | 31   | 31   | 1.02 |               |
| <i>yrzD</i>  | 2,804,931 | 2,805,455 | - | 43   | 50   | 0.86 | 56   | 54   | 1.03 |               |
| <i>yrzC</i>  | 2,805,513 | 2,807,909 | - | 223  | 202  | 1.11 | 405  | 433  | 0.94 |               |
| <i>yrzB</i>  | 2,807,934 | 2,808,554 | - | 260  | 236  | 1.10 | 537  | 547  | 0.98 |               |
| <i>trmU</i>  | 2,808,640 | 2,809,764 | - | 729  | 706  | 1.03 | 930  | 1179 | 0.79 |               |
| <i>yrzO</i>  | 2,809,786 | 2,810,925 | - | 770  | 727  | 1.06 | 930  | 1243 | 0.75 |               |
| <i>yrzC</i>  | 2,811,027 | 2,811,362 | - | 362  | 354  | 1.02 | 362  | 602  | 0.60 |               |
| <i>yrzN</i>  | 2,811,562 | 2,812,827 | + | 198  | 178  | 1.11 | 205  | 196  | 1.05 |               |
| <i>yrzM</i>  | 2,812,869 | 2,813,633 | - | 296  | 369  | 0.80 | 273  | 375  | 0.73 |               |
| <i>aspS</i>  | 2,813,969 | 2,815,747 | - | 1295 | 1570 | 0.82 | 1759 | 1964 | 0.90 |               |
| <i>hisK</i>  | 2,815,761 | 2,817,035 | - | 770  | 857  | 0.90 | 1071 | 1397 | 0.77 |               |
| <i>yrzK</i>  | 2,817,417 | 2,817,587 | - | 24   | 28   | 0.85 | 41   | 44   | 0.94 |               |
| <i>yrzJ</i>  | 2,817,720 | 2,819,276 | + | 1013 | 972  | 1.04 | 1384 | 1318 | 1.05 |               |
| <i>yrzI</i>  | 2,819,303 | 2,819,701 | - | 1025 | 876  | 1.17 | 1540 | 1399 | 1.10 |               |
| <i>relA</i>  | 2,819,755 | 2,821,959 | - | 1403 | 1242 | 1.13 | 1524 | 1536 | 0.99 |               |
| <i>apt</i>   | 2,822,127 | 2,822,639 | - | 881  | 710  | 1.24 | 1319 | 1405 | 0.94 |               |
| <i>yrzE</i>  | 2,822,645 | 2,825,005 | - | 688  | 619  | 1.11 | 1040 | 1120 | 0.93 |               |
| <i>yrzD</i>  | 2,825,072 | 2,825,395 | - | 1130 | 1212 | 0.93 | 897  | 659  | 1.36 |               |
| <i>yrzC</i>  | 2,825,471 | 2,825,968 | - | 338  | 359  | 0.94 | 462  | 633  | 0.73 |               |
| <i>secDF</i> | 2,826,126 | 2,828,339 | - | 1514 | 1551 | 0.98 | 1540 | 1769 | 0.87 |               |
| <i>yrzD</i>  | 2,828,378 | 2,828,674 | - | 1375 | 1421 | 0.97 | 1612 | 2009 | 0.80 |               |
| <i>spoVB</i> | 2,828,790 | 2,830,346 | + | 59   | 65   | 0.91 | 53   | 63   | 0.83 |               |
| <i>yrzG</i>  | 2,830,350 | 2,831,006 | - | 55   | 64   | 0.87 | 47   | 53   | 0.88 |               |
| <i>yrzE</i>  | 2,831,141 | 2,831,593 | + | 70   | 58   | 1.21 | 67   | 55   | 1.22 |               |

|                |           |           |   |      |      |      |      |      |      |
|----------------|-----------|-----------|---|------|------|------|------|------|------|
| <i>yrbF</i>    | 2,831,650 | 2,831,919 | - | 2593 | 2447 | 1.06 | 2056 | 2084 | 0.99 |
| <i>tgt</i>     | 2,831,953 | 2,833,098 | - | 760  | 590  | 1.29 | 1158 | 1045 | 1.11 |
| <i>queA</i>    | 2,833,125 | 2,834,153 | - | 905  | 677  | 1.34 | 1228 | 1157 | 1.06 |
| <i>ruvB</i>    | 2,834,376 | 2,835,380 | - | 568  | 471  | 1.21 | 714  | 764  | 0.93 |
| <i>ruvA</i>    | 2,835,391 | 2,835,996 | - | 542  | 401  | 1.35 | 475  | 627  | 0.76 |
| <i>bofC</i>    | 2,836,135 | 2,836,647 | - | 1055 | 701  | 1.51 | 428  | 265  | 1.62 |
| <i>csbX</i>    | 2,836,695 | 2,838,002 | - | 1942 | 1478 | 1.31 | 732  | 450  | 1.63 |
| <i>yrbE</i>    | 2,838,073 | 2,839,098 | - | 229  | 235  | 0.97 | 234  | 286  | 0.82 |
| <i>yrzF</i>    | 2,839,336 | 2,839,728 | + | 515  | 505  | 1.02 | 388  | 406  | 0.95 |
| <i>yrzG</i>    | 2,839,761 | 2,839,982 | + | 505  | 522  | 0.97 | 283  | 321  | 0.88 |
| <i>yrbD</i>    | 2,840,836 | 2,842,290 | + | 132  | 137  | 0.97 | 95   | 106  | 0.89 |
| <i>yrbC</i>    | 2,842,331 | 2,843,053 | - | 210  | 204  | 1.03 | 264  | 239  | 1.10 |
| <i>coxA</i>    | 2,843,156 | 2,843,674 | - | 362  | 354  | 1.02 | 495  | 490  | 1.01 |
| <i>safA</i>    | 2,843,900 | 2,845,063 | - | 3235 | 3540 | 0.91 | 2888 | 2995 | 0.96 |
| <i>nadA</i>    | 2,845,180 | 2,846,286 | - | 4229 | 4270 | 0.99 | 3635 | 3683 | 0.99 |
| <i>nadC</i>    | 2,846,273 | 2,847,142 | - | 2947 | 2577 | 1.14 | 2469 | 2592 | 0.95 |
| <i>nadB</i>    | 2,847,096 | 2,848,691 | - | 2522 | 1815 | 1.39 | 2212 | 2542 | 0.87 |
| <i>nifS</i>    | 2,848,794 | 2,849,981 | + | 1203 | 793  | 1.52 | 1103 | 1303 | 0.85 |
| <i>yrxA</i>    | 2,849,941 | 2,850,477 | + | 1560 | 1172 | 1.33 | 1726 | 1970 | 0.88 |
| <i>pheA</i>    | 2,850,509 | 2,851,366 | - | 353  | 376  | 0.94 | 655  | 676  | 0.97 |
| <i>pheB</i>    | 2,851,383 | 2,851,826 | - | 875  | 865  | 1.01 | 1195 | 1211 | 0.99 |
| <i>obg</i>     | 2,851,887 | 2,853,173 | - | 857  | 828  | 1.03 | 1222 | 1276 | 0.96 |
| <i>spo0B</i>   | 2,853,207 | 2,853,785 | - | 563  | 562  | 1.00 | 810  | 921  | 0.88 |
| <i>rpmA</i>    | 2,854,106 | 2,854,390 | - | 2926 | 3453 | 0.85 | 2158 | 2444 | 0.88 |
| <i>ysxB</i>    | 2,854,403 | 2,854,741 | - | 5991 | 7029 | 0.85 | 5688 | 5514 | 1.03 |
| <i>rplU</i>    | 2,854,744 | 2,855,052 | - | 6299 | 7465 | 0.84 | 5887 | 5917 | 0.99 |
| <i>spoIVFB</i> | 2,855,199 | 2,856,065 | - | 77   | 65   | 1.18 | 95   | 76   | 1.25 |
| <i>spoIVFA</i> | 2,856,058 | 2,856,852 | - | 88   | 67   | 1.32 | 120  | 83   | 1.44 |
| <i>minD</i>    | 2,857,003 | 2,857,809 | - | 1551 | 1335 | 1.16 | 2108 | 2063 | 1.02 |
| <i>minC</i>    | 2,857,811 | 2,858,491 | - | 1729 | 1468 | 1.18 | 2272 | 2359 | 0.96 |
| <i>mreD</i>    | 2,858,544 | 2,859,062 | - | 1159 | 909  | 1.28 | 1670 | 1752 | 0.95 |
| <i>mreC</i>    | 2,859,059 | 2,859,931 | - | 1375 | 1157 | 1.19 | 2607 | 2588 | 1.01 |
| <i>mreB</i>    | 2,859,962 | 2,860,975 | - | 1308 | 1173 | 1.12 | 2005 | 2110 | 0.95 |
| <i>radC</i>    | 2,861,066 | 2,861,761 | - | 501  | 492  | 1.02 | 850  | 950  | 0.89 |
| <i>maf</i>     | 2,861,798 | 2,862,367 | - | 734  | 733  | 1.00 | 1272 | 1289 | 0.99 |
| <i>spolIB</i>  | 2,862,520 | 2,863,518 | - | 119  | 110  | 1.08 | 131  | 166  | 0.79 |
| <i>comC</i>    | 2,863,652 | 2,864,398 | - | 150  | 145  | 1.03 | 204  | 292  | 0.70 |
| <i>folC</i>    | 2,864,538 | 2,865,830 | - | 524  | 595  | 0.88 | 985  | 994  | 0.99 |
| <i>valS</i>    | 2,865,890 | 2,868,532 | - | 673  | 639  | 1.05 | 1406 | 1505 | 0.93 |
| <i>ysxE</i>    | 2,869,029 | 2,870,054 | - | 73   | 76   | 0.96 | 63   | 78   | 0.80 |
| <i>spoVID</i>  | 2,870,087 | 2,871,814 | - | 96   | 99   | 0.97 | 79   | 86   | 0.93 |
| <i>hemL</i>    | 2,871,945 | 2,873,237 | - | 1616 | 1241 | 1.30 | 1440 | 1139 | 1.26 |
| <i>hemB</i>    | 2,873,267 | 2,874,241 | - | 1658 | 1188 | 1.40 | 1518 | 1244 | 1.22 |
| <i>hemD</i>    | 2,874,238 | 2,875,026 | - | 1104 | 680  | 1.62 | 903  | 713  | 1.27 |
| <i>hemC</i>    | 2,875,016 | 2,875,960 | - | 1122 | 685  | 1.64 | 766  | 606  | 1.26 |
| <i>hemX</i>    | 2,875,993 | 2,876,823 | - | 587  | 375  | 1.56 | 415  | 360  | 1.15 |
| <i>hemA</i>    | 2,876,831 | 2,878,198 | - | 1715 | 1349 | 1.27 | 1121 | 1074 | 1.04 |
| <i>ysxD</i>    | 2,878,362 | 2,878,925 | + | 77   | 82   | 0.94 | 105  | 107  | 0.98 |
| <i>ysxC</i>    | 2,878,947 | 2,879,534 | - | 1093 | 854  | 1.28 | 1395 | 1138 | 1.23 |
| <i>lonA</i>    | 2,879,531 | 2,881,855 | - | 1589 | 1267 | 1.25 | 1518 | 1234 | 1.23 |
| <i>lonB</i>    | 2,882,036 | 2,883,694 | - | 130  | 104  | 1.25 | 85   | 95   | 0.90 |
| <i>clpX</i>    | 2,883,846 | 2,885,108 | - | 2186 | 2013 | 1.09 | 2186 | 2322 | 0.94 |
| <i>tig</i>     | 2,885,381 | 2,886,655 | - | 2233 | 1991 | 1.12 | 3464 | 3785 | 0.92 |
| <i>ysoA</i>    | 2,886,883 | 2,887,815 | - | 558  | 635  | 0.88 | 745  | 986  | 0.76 |
| <i>leuD</i>    | 2,888,005 | 2,888,604 | - | 1007 | 1505 | 0.67 | 1630 | 2053 | 0.79 |
| <i>leuC</i>    | 2,888,617 | 2,890,035 | - | 2910 | 3903 | 0.75 | 3602 | 4323 | 0.83 |
| <i>leuB</i>    | 2,890,085 | 2,891,182 | - | 2715 | 3638 | 0.75 | 3599 | 4309 | 0.84 |
| <i>leuA</i>    | 2,891,203 | 2,892,759 | - | 2749 | 3632 | 0.76 | 3350 | 4040 | 0.83 |
| <i>ilvC</i>    | 2,892,746 | 2,893,774 | - | 4120 | 5246 | 0.79 | 4523 | 5069 | 0.89 |
| <i>ilvH</i>    | 2,893,791 | 2,894,315 | - | 3083 | 3915 | 0.79 | 3737 | 4205 | 0.89 |
| <i>ilvB</i>    | 2,894,312 | 2,896,036 | - | 2257 | 2678 | 0.84 | 2840 | 3468 | 0.82 |
| <i>ysnD</i>    | 2,896,852 | 2,897,187 | + | 63   | 65   | 0.98 | 49   | 53   | 0.92 |
| <i>ysnE</i>    | 2,897,356 | 2,897,811 | + | 103  | 107  | 0.96 | 128  | 125  | 1.03 |
| <i>ysnF</i>    | 2,897,995 | 2,898,855 | + | 2698 | 2693 | 1.00 | 1737 | 930  | 1.87 |
| <i>ysnB</i>    | 2,899,086 | 2,899,601 | - | 2158 | 1489 | 1.45 | 1543 | 1177 | 1.31 |
| <i>ysnA</i>    | 2,899,611 | 2,900,207 | - | 2486 | 1700 | 1.46 | 1819 | 1475 | 1.23 |
| <i>rph</i>     | 2,900,220 | 2,900,957 | - | 2121 | 1428 | 1.49 | 1442 | 1192 | 1.21 |
| <i>gerM</i>    | 2,901,068 | 2,902,168 | - | 144  | 133  | 1.09 | 87   | 99   | 0.88 |
| <i>racE</i>    | 2,902,284 | 2,903,102 | - | 517  | 493  | 1.05 | 639  | 719  | 0.89 |
| <i>ysmB</i>    | 2,903,110 | 2,903,550 | - | 756  | 721  | 1.05 | 938  | 1142 | 0.82 |
| <i>gerE</i>    | 2,903,794 | 2,904,018 | - | 151  | 156  | 0.97 | 223  | 279  | 0.80 |
| <i>ysmA</i>    | 2,904,134 | 2,904,577 | - | 227  | 323  | 0.70 | 368  | 517  | 0.71 |
| <i>sdhB</i>    | 2,904,640 | 2,905,401 | - | 2443 | 2862 | 0.85 | 2758 | 2934 | 0.94 |
| <i>sdhA</i>    | 2,905,404 | 2,907,164 | - | 2357 | 2698 | 0.87 | 3085 | 3347 | 0.92 |
| <i>sdhC</i>    | 2,907,198 | 2,907,806 | - | 1714 | 1727 | 0.99 | 2263 | 2563 | 0.88 |
| <i>yslB</i>    | 2,908,099 | 2,908,545 | + | 961  | 863  | 1.11 | 1131 | 860  | 1.32 |
| <i>lysC</i>    | 2,908,589 | 2,909,815 | - | 1327 | 1406 | 0.94 | 1437 | 1836 | 0.78 |
| <i>uvrC</i>    | 2,910,160 | 2,911,956 | - | 461  | 325  | 1.42 | 333  | 343  | 0.97 |
| <i>trxA</i>    | 2,912,092 | 2,912,406 | - | 4849 | 4160 | 1.17 | 3549 | 3589 | 0.99 |
| <i>xsa</i>     | 2,912,729 | 2,914,216 | - | 94   | 103  | 0.91 | 86   | 106  | 0.81 |
| <i>etfA</i>    | 2,914,433 | 2,915,410 | - | 261  | 376  | 0.69 | 315  | 461  | 0.68 |
| <i>etfB</i>    | 2,915,446 | 2,916,219 | - | 377  | 482  | 0.78 | 477  | 644  | 0.74 |
| <i>ysiB</i>    | 2,916,234 | 2,917,010 | - | 264  | 328  | 0.81 | 317  | 422  | 0.75 |
| <i>ysiA</i>    | 2,917,025 | 2,917,609 | - | 440  | 526  | 0.84 | 550  | 780  | 0.71 |
| <i>lcfA</i>    | 2,917,714 | 2,919,396 | - | 591  | 567  | 1.04 | 578  | 602  | 0.96 |
| <i>yshE</i>    | 2,919,585 | 2,919,989 | - | 616  | 601  | 1.02 | 800  | 891  | 0.90 |
| <i>mutSB</i>   | 2,920,004 | 2,922,361 | - | 602  | 570  | 1.06 | 916  | 905  | 1.01 |
| <i>yshC</i>    | 2,922,382 | 2,924,094 | - | 565  | 540  | 1.05 | 749  | 777  | 0.96 |
| <i>yshB</i>    | 2,924,168 | 2,924,701 | - | 156  | 166  | 0.94 | 134  | 167  | 0.80 |
| <i>yshA</i>    | 2,924,708 | 2,924,965 | - | 320  | 318  | 1.01 | 421  | 575  | 0.73 |
| <i>rnhC</i>    | 2,925,099 | 2,926,040 | + | 281  | 247  | 1.13 | 306  | 343  | 0.89 |

|             |           |           |   |      |      |      |      |      |      |                       |
|-------------|-----------|-----------|---|------|------|------|------|------|------|-----------------------|
| <i>pheT</i> | 2,926,076 | 2,928,490 | - | 901  | 983  | 0.92 | 1334 | 1337 | 1.00 |                       |
| <i>pheS</i> | 2,928,506 | 2,929,540 | - | 831  | 785  | 1.06 | 1413 | 1486 | 0.95 |                       |
| <i>ysgA</i> | 2,929,895 | 2,930,641 | - | 315  | 277  | 1.14 | 302  | 350  | 0.86 |                       |
| <i>sspl</i> | 2,930,760 | 2,930,975 | + | 37   | 46   | 0.81 | 36   | 36   | 0.98 |                       |
| <i>ysfB</i> | 2,931,044 | 2,932,150 | + | 131  | 115  | 1.14 | 152  | 161  | 0.95 |                       |
| <i>ysfC</i> | 2,932,253 | 2,933,665 | + | 351  | 245  | 1.43 | 359  | 374  | 0.96 |                       |
| <i>ysfD</i> | 2,933,662 | 2,934,996 | + | 289  | 215  | 1.35 | 238  | 245  | 0.97 |                       |
| <i>ysfE</i> | 2,935,035 | 2,935,277 | - | 384  | 414  | 0.93 | 399  | 430  | 0.93 |                       |
| <i>cstA</i> | 2,935,450 | 2,937,246 | - | 227  | 251  | 0.90 | 238  | 271  | 0.88 |                       |
| <i>abfA</i> | 2,937,398 | 2,938,900 | - | 80   | 82   | 0.98 | 70   | 85   | 0.82 |                       |
| <i>araQ</i> | 2,938,919 | 2,939,764 | - | 51   | 52   | 0.99 | 45   | 49   | 0.92 |                       |
| <i>araP</i> | 2,939,765 | 2,940,706 | - | 74   | 75   | 0.99 | 64   | 72   | 0.89 |                       |
| <i>araN</i> | 2,940,742 | 2,942,043 | - | 74   | 76   | 0.96 | 68   | 75   | 0.92 |                       |
| <i>araM</i> | 2,942,074 | 2,943,258 | - | 70   | 69   | 1.01 | 60   | 71   | 0.85 |                       |
| <i>araL</i> | 2,943,255 | 2,944,073 | - | 66   | 69   | 0.96 | 56   | 65   | 0.86 |                       |
| <i>araD</i> | 2,944,051 | 2,944,740 | - | 58   | 62   | 0.93 | 57   | 65   | 0.88 |                       |
| <i>araB</i> | 2,944,757 | 2,946,439 | - | 131  | 140  | 0.94 | 134  | 138  | 0.97 |                       |
| <i>araA</i> | 2,946,453 | 2,947,949 | - | 145  | 142  | 1.02 | 128  | 152  | 0.84 |                       |
| <i>abnA</i> | 2,948,157 | 2,949,098 | - | 42   | 43   | 0.98 | 34   | 38   | 0.90 |                       |
| <i>ysdC</i> | 2,949,295 | 2,950,380 | - | 1224 | 1096 | 1.12 | 1554 | 1466 | 1.06 |                       |
| <i>ysdB</i> | 2,950,564 | 2,950,956 | + | 1170 | 1440 | 0.81 | 956  | 961  | 0.99 |                       |
| <i>ysdA</i> | 2,950,972 | 2,951,241 | - | 55   | 69   | 0.80 | 129  | 134  | 0.96 |                       |
| <i>rplT</i> | 2,951,298 | 2,951,657 | - | 719  | 1010 | 0.71 | 1373 | 1597 | 0.86 |                       |
| <i>rpmI</i> | 2,951,689 | 2,951,889 | - | 4590 | 5266 | 0.87 | 4704 | 4813 | 0.98 |                       |
| <i>infC</i> | 2,951,902 | 2,952,423 | - | 4238 | 4789 | 0.89 | 4363 | 4414 | 0.99 |                       |
| <i>yscA</i> | 2,952,595 | 2,952,819 | + | 17   | 25   | 0.68 | 25   | 22   | 1.14 |                       |
| <i>yscB</i> | 2,952,869 | 2,953,501 | + | 2048 | 2291 | 0.89 | 1737 | 1691 | 1.03 | AbrB and SigD regulon |
| <i>ysbB</i> | 2,953,533 | 2,954,228 | - | 101  | 110  | 0.92 | 70   | 96   | 0.73 |                       |
| <i>ysbA</i> | 2,954,250 | 2,954,690 | - | 48   | 52   | 0.92 | 48   | 52   | 0.92 |                       |
| <i>lytT</i> | 2,954,824 | 2,955,549 | - | 224  | 174  | 1.29 | 337  | 330  | 1.02 |                       |
| <i>lytS</i> | 2,955,527 | 2,957,308 | - | 165  | 146  | 1.13 | 174  | 200  | 0.87 |                       |
| <i>ysaA</i> | 2,957,475 | 2,958,257 | + | 667  | 623  | 1.07 | 904  | 1114 | 0.81 |                       |
| <i>thrS</i> | 2,958,298 | 2,960,229 | - | 770  | 833  | 0.92 | 1297 | 1376 | 0.94 |                       |
| <i>ytxC</i> | 2,960,626 | 2,961,471 | - | 293  | 236  | 1.24 | 388  | 405  | 0.96 |                       |
| <i>ytxB</i> | 2,961,550 | 2,962,191 | - | 421  | 328  | 1.28 | 599  | 576  | 1.04 |                       |
| <i>dnal</i> | 2,962,225 | 2,963,160 | - | 344  | 285  | 1.21 | 460  | 498  | 0.92 |                       |
| <i>dnaB</i> | 2,963,188 | 2,964,606 | - | 206  | 197  | 1.04 | 266  | 332  | 0.80 |                       |
| <i>ytcG</i> | 2,964,721 | 2,965,179 | - | 138  | 151  | 0.91 | 227  | 242  | 0.94 |                       |
| <i>speD</i> | 2,965,453 | 2,965,839 | - | 1061 | 1449 | 0.73 | 1113 | 1235 | 0.90 |                       |
| <i>gapB</i> | 2,966,072 | 2,967,094 | - | 75   | 76   | 1.00 | 77   | 88   | 0.87 |                       |
| <i>ytcD</i> | 2,967,300 | 2,967,680 | - | 90   | 83   | 1.07 | 116  | 118  | 0.98 |                       |
| <i>ytdB</i> | 2,967,864 | 2,969,054 | + | 67   | 64   | 1.05 | 51   | 55   | 0.92 |                       |
| <i>ytdE</i> | 2,969,078 | 2,969,920 | + | 90   | 89   | 1.01 | 89   | 93   | 0.96 |                       |
| <i>ytaG</i> | 2,969,962 | 2,970,555 | - | 597  | 421  | 1.42 | 879  | 741  | 1.19 |                       |
| <i>ytaF</i> | 2,970,717 | 2,971,196 | - | 842  | 615  | 1.37 | 1379 | 1076 | 1.28 |                       |
| <i>mutM</i> | 2,971,368 | 2,972,204 | - | 834  | 641  | 1.30 | 1228 | 964  | 1.27 |                       |
| <i>polA</i> | 2,972,221 | 2,974,863 | - | 736  | 504  | 1.46 | 925  | 816  | 1.13 |                       |
| <i>phoR</i> | 2,975,107 | 2,976,846 | - | 480  | 454  | 1.06 | 537  | 595  | 0.90 |                       |
| <i>phoP</i> | 2,976,839 | 2,977,561 | - | 442  | 477  | 0.93 | 444  | 547  | 0.81 |                       |
| <i>mdh</i>  | 2,977,773 | 2,978,711 | - | 6218 | 6826 | 0.91 | 5291 | 5258 | 1.01 |                       |
| <i>icd</i>  | 2,978,755 | 2,980,026 | - | 7020 | 7500 | 0.94 | 6242 | 6093 | 1.02 |                       |
| <i>ciuZ</i> | 2,980,190 | 2,981,308 | - | 5717 | 6245 | 0.92 | 4841 | 4803 | 1.01 |                       |
| <i>ytwI</i> | 2,981,642 | 2,982,106 | - | 131  | 140  | 0.93 | 207  | 222  | 0.93 |                       |
| <i>ytwI</i> | 2,982,203 | 2,983,318 | + | 43   | 45   | 0.95 | 34   | 42   | 0.81 |                       |
| <i>ytzA</i> | 2,983,351 | 2,983,734 | - | 1727 | 1584 | 1.09 | 1954 | 1784 | 1.10 |                       |
| <i>pyk</i>  | 2,983,827 | 2,985,584 | - | 2893 | 2670 | 1.08 | 2945 | 2828 | 1.04 |                       |
| <i>pfkA</i> | 2,985,627 | 2,986,586 | - | 2205 | 2034 | 1.08 | 2704 | 2733 | 0.99 |                       |
| <i>accA</i> | 2,986,770 | 2,987,747 | - | 1406 | 1337 | 1.05 | 1920 | 2056 | 0.93 |                       |
| <i>accD</i> | 2,987,732 | 2,988,520 | - | 1607 | 1573 | 1.02 | 2284 | 2377 | 0.96 | Spo0A regulon         |
| <i>ytsJ</i> | 2,988,939 | 2,990,171 | - | 1091 | 1092 | 1.00 | 1261 | 1373 | 0.92 |                       |
| <i>dnaE</i> | 2,990,308 | 2,993,655 | - | 480  | 440  | 1.09 | 436  | 427  | 1.02 |                       |
| <i>ytrI</i> | 2,994,133 | 2,994,636 | + | 31   | 34   | 0.93 | 36   | 36   | 0.99 |                       |
| <i>ytiQ</i> | 2,994,947 | 2,995,888 | - | 340  | 361  | 0.94 | 619  | 731  | 0.85 |                       |
| <i>ytpI</i> | 2,996,019 | 2,996,321 | + | 597  | 478  | 1.25 | 405  | 437  | 0.93 |                       |
| <i>ytoI</i> | 2,996,340 | 2,997,659 | - | 245  | 249  | 0.98 | 255  | 311  | 0.82 |                       |
| <i>ytmM</i> | 2,997,835 | 2,998,737 | - | 66   | 69   | 0.96 | 58   | 63   | 0.91 |                       |
| <i>ytmL</i> | 2,998,756 | 3,000,006 | - | 58   | 58   | 1.00 | 57   | 57   | 1.00 |                       |
| <i>ribR</i> | 3,000,024 | 3,000,716 | - | 52   | 51   | 1.01 | 56   | 52   | 1.07 |                       |
| <i>ytmJ</i> | 3,000,763 | 3,002,091 | - | 61   | 67   | 0.91 | 59   | 63   | 0.94 |                       |
| <i>ytmI</i> | 3,002,088 | 3,002,369 | - | 69   | 68   | 1.01 | 79   | 79   | 1.00 |                       |
| <i>ytmO</i> | 3,002,384 | 3,003,388 | - | 93   | 95   | 0.98 | 80   | 95   | 0.84 |                       |
| <i>ytmN</i> | 3,003,385 | 3,004,164 | - | 123  | 120  | 1.02 | 90   | 118  | 0.77 |                       |
| <i>ytmM</i> | 3,004,161 | 3,004,868 | - | 46   | 45   | 1.00 | 41   | 44   | 0.93 |                       |
| <i>ytmL</i> | 3,004,898 | 3,005,617 | - | 42   | 41   | 1.03 | 40   | 44   | 0.91 |                       |
| <i>ytmK</i> | 3,005,639 | 3,006,451 | - | 60   | 53   | 1.13 | 51   | 62   | 0.83 |                       |
| <i>ytmJ</i> | 3,006,465 | 3,007,274 | - | 70   | 64   | 1.10 | 58   | 70   | 0.83 |                       |
| <i>ytmI</i> | 3,007,288 | 3,007,824 | - | 49   | 43   | 1.12 | 44   | 56   | 0.78 |                       |
| <i>ytiI</i> | 3,007,977 | 3,008,903 | + | 72   | 55   | 1.31 | 95   | 153  | 0.62 |                       |
| <i>ytkL</i> | 3,008,954 | 3,009,637 | - | 2853 | 2179 | 1.31 | 1701 | 1330 | 1.28 |                       |
| <i>ytkK</i> | 3,009,700 | 3,010,467 | - | 590  | 495  | 1.19 | 759  | 847  | 0.90 |                       |
| <i>ytdD</i> | 3,010,594 | 3,010,830 | - | 263  | 300  | 0.88 | 997  | 1284 | 0.78 |                       |
| <i>argH</i> | 3,010,790 | 3,012,175 | - | 835  | 905  | 0.92 | 2398 | 2747 | 0.87 |                       |
| <i>argG</i> | 3,012,172 | 3,013,383 | - | 477  | 454  | 1.05 | 1955 | 2373 | 0.82 |                       |
| <i>moaB</i> | 3,013,553 | 3,014,065 | - | 246  | 192  | 1.28 | 392  | 337  | 1.16 |                       |
| <i>ackA</i> | 3,014,150 | 3,015,337 | - | 734  | 591  | 1.24 | 1311 | 1159 | 1.13 |                       |
| <i>ytxK</i> | 3,015,685 | 3,016,674 | - | 637  | 617  | 1.03 | 685  | 667  | 1.03 |                       |
| <i>tpx</i>  | 3,016,735 | 3,017,238 | - | 3341 | 3580 | 0.93 | 2867 | 2731 | 1.05 |                       |
| <i>ytfJ</i> | 3,017,348 | 3,017,803 | - | 47   | 52   | 0.90 | 51   | 57   | 0.89 |                       |
| <i>ytfI</i> | 3,017,817 | 3,018,497 | - | 65   | 67   | 0.97 | 78   | 77   | 1.02 |                       |
| <i>yteJ</i> | 3,018,572 | 3,019,066 | - | 986  | 1155 | 0.85 | 2593 | 2606 | 1.00 |                       |
| <i>sppA</i> | 3,019,079 | 3,020,086 | - | 902  | 923  | 0.98 | 1766 | 1936 | 0.91 |                       |

|             |           |           |   |      |      |      |      |      |      |
|-------------|-----------|-----------|---|------|------|------|------|------|------|
| <i>ytdI</i> | 3,020,272 | 3,021,075 | + | 839  | 1126 | 0.75 | 1092 | 1159 | 0.94 |
| <i>ytcJ</i> | 3,021,107 | 3,022,696 | - | 661  | 572  | 1.15 | 1068 | 928  | 1.15 |
| <i>ytcI</i> | 3,022,716 | 3,024,311 | - | 631  | 486  | 1.30 | 1133 | 1043 | 1.09 |
| <i>sspA</i> | 3,024,484 | 3,024,693 | - | 189  | 156  | 1.21 | 287  | 267  | 1.07 |
| <i>ytbJ</i> | 3,024,920 | 3,025,996 | - | 286  | 221  | 1.29 | 513  | 473  | 1.08 |
| <i>nifZ</i> | 3,026,000 | 3,027,145 | - | 209  | 189  | 1.11 | 267  | 264  | 1.01 |
| <i>braB</i> | 3,027,340 | 3,028,677 | + | 86   | 75   | 1.15 | 231  | 184  | 1.26 |
| <i>ezrA</i> | 3,028,772 | 3,030,460 | - | 1229 | 1290 | 0.95 | 1299 | 1590 | 0.82 |
| <i>hisJ</i> | 3,030,657 | 3,031,463 | + | 465  | 491  | 0.95 | 415  | 511  | 0.81 |
| <i>ytpP</i> | 3,031,460 | 3,032,083 | - | 59   | 68   | 0.86 | 66   | 78   | 0.85 |
| <i>ytsP</i> | 3,032,464 | 3,032,700 | + | 297  | 299  | 0.99 | 580  | 625  | 0.93 |
| <i>ytrP</i> | 3,032,738 | 3,034,477 | - | 458  | 319  | 1.44 | 258  | 272  | 0.95 |
| <i>rpsD</i> | 3,034,772 | 3,035,374 | + | 825  | 1051 | 0.78 | 1497 | 1737 | 0.86 |
| <i>tyrS</i> | 3,035,645 | 3,036,913 | - | 487  | 481  | 1.01 | 1163 | 1311 | 0.89 |
| <i>acsA</i> | 3,037,255 | 3,038,973 | - | 833  | 998  | 0.83 | 1091 | 1382 | 0.79 |
| <i>acuA</i> | 3,039,134 | 3,039,766 | + | 409  | 310  | 1.32 | 413  | 417  | 0.99 |
| <i>acuB</i> | 3,039,793 | 3,040,437 | + | 434  | 328  | 1.32 | 464  | 495  | 0.94 |
| <i>acuC</i> | 3,040,434 | 3,041,597 | + | 470  | 387  | 1.21 | 523  | 537  | 0.97 |
| <i>ytxE</i> | 3,041,608 | 3,042,336 | - | 90   | 100  | 0.91 | 179  | 240  | 0.74 |
| <i>ytxD</i> | 3,042,326 | 3,043,144 | - | 77   | 86   | 0.89 | 196  | 217  | 0.91 |
| <i>ccpA</i> | 3,043,207 | 3,044,211 | - | 489  | 494  | 0.99 | 822  | 906  | 0.91 |
| <i>aroA</i> | 3,044,486 | 3,045,562 | - | 1887 | 1857 | 1.02 | 3399 | 3409 | 1.00 |
| <i>ytxJ</i> | 3,045,798 | 3,046,124 | - | 4710 | 5239 | 0.90 | 2277 | 1916 | 1.19 |
| <i>ytxH</i> | 3,046,148 | 3,046,606 | - | 6707 | 7459 | 0.90 | 3929 | 3556 | 1.10 |
| <i>ytxG</i> | 3,046,634 | 3,047,065 | - | 6740 | 7410 | 0.91 | 4004 | 3358 | 1.19 |
| <i>murC</i> | 3,047,227 | 3,048,525 | - | 992  | 865  | 1.15 | 1375 | 1484 | 0.93 |
| <i>ytpT</i> | 3,048,775 | 3,050,883 | - | 624  | 381  | 1.64 | 1091 | 906  | 1.21 |
| <i>ytpS</i> | 3,050,838 | 3,051,632 | - | 510  | 388  | 1.32 | 679  | 660  | 1.03 |
| <i>ytpR</i> | 3,051,792 | 3,052,397 | - | 1172 | 1004 | 1.17 | 2061 | 1718 | 1.20 |
| <i>ytpQ</i> | 3,052,413 | 3,053,222 | - | 1049 | 755  | 1.39 | 1650 | 1439 | 1.15 |
| <i>ytpP</i> | 3,053,237 | 3,053,560 | - | 878  | 611  | 1.44 | 1354 | 1326 | 1.02 |
| <i>ytoQ</i> | 3,053,795 | 3,054,241 | + | 752  | 781  | 0.96 | 1220 | 1260 | 0.97 |
| <i>ytoP</i> | 3,054,296 | 3,055,369 | - | 742  | 747  | 0.99 | 840  | 897  | 0.94 |
| <i>ytzB</i> | 3,055,528 | 3,055,845 | + | 2058 | 1893 | 1.09 | 2298 | 2078 | 1.11 |
| <i>malS</i> | 3,055,898 | 3,057,598 | - | 3385 | 2698 | 1.25 | 3027 | 2267 | 1.34 |
| <i>ytmP</i> | 3,057,680 | 3,058,450 | - | 3792 | 2993 | 1.27 | 3385 | 2574 | 1.32 |
| <i>ytmQ</i> | 3,058,596 | 3,059,237 | - | 256  | 300  | 0.85 | 327  | 424  | 0.77 |
| <i>ytzH</i> | 3,059,444 | 3,059,722 | + | 22   | 27   | 0.83 | 25   | 27   | 0.92 |
| <i>ytmP</i> | 3,059,723 | 3,060,532 | - | 445  | 455  | 0.98 | 477  | 565  | 0.85 |
| <i>amyX</i> | 3,060,700 | 3,062,856 | - | 598  | 433  | 1.38 | 581  | 576  | 1.01 |
| <i>ytlR</i> | 3,062,882 | 3,063,811 | - | 1137 | 862  | 1.32 | 976  | 938  | 1.04 |
| <i>ytlQ</i> | 3,063,860 | 3,064,774 | - | 1111 | 989  | 1.12 | 1049 | 916  | 1.15 |
| <i>ytlP</i> | 3,064,800 | 3,065,351 | - | 609  | 515  | 1.18 | 773  | 658  | 1.17 |
| <i>ytkP</i> | 3,065,500 | 3,066,435 | + | 204  | 197  | 1.04 | 285  | 322  | 0.89 |
| <i>ytlP</i> | 3,066,469 | 3,067,860 | + | 1063 | 834  | 1.27 | 1363 | 1059 | 1.29 |
| <i>ytlP</i> | 3,067,957 | 3,069,255 | + | 107  | 87   | 1.22 | 116  | 120  | 0.97 |
| <i>ythQ</i> | 3,069,294 | 3,070,451 | - | 452  | 399  | 1.13 | 656  | 657  | 1.00 |
| <i>ythP</i> | 3,070,448 | 3,071,158 | - | 705  | 609  | 1.16 | 1000 | 939  | 1.07 |
| <i>ytzE</i> | 3,071,449 | 3,071,670 | + | 649  | 887  | 0.73 | 306  | 320  | 0.96 |
| <i>ytzF</i> | 3,071,791 | 3,072,264 | - | 207  | 164  | 1.26 | 241  | 238  | 1.01 |
| <i>ytzG</i> | 3,072,249 | 3,072,509 | - | 195  | 173  | 1.13 | 230  | 246  | 0.94 |
| <i>ytgP</i> | 3,072,578 | 3,074,212 | - | 312  | 266  | 1.17 | 359  | 421  | 0.85 |
| <i>ytlP</i> | 3,074,720 | 3,075,676 | + | 541  | 435  | 1.24 | 527  | 457  | 1.15 |
| <i>opuD</i> | 3,075,865 | 3,077,403 | + | 748  | 558  | 1.34 | 515  | 449  | 1.15 |
| <i>yteV</i> | 3,077,440 | 3,077,622 | - | 22   | 33   | 0.66 | 24   | 27   | 0.89 |
| <i>yteU</i> | 3,077,690 | 3,078,358 | - | 59   | 58   | 1.02 | 69   | 63   | 1.10 |
| <i>yteT</i> | 3,078,380 | 3,079,666 | - | 99   | 98   | 1.00 | 83   | 90   | 0.92 |
| <i>yteS</i> | 3,079,678 | 3,080,157 | - | 52   | 49   | 1.04 | 42   | 50   | 0.84 |
| <i>yteR</i> | 3,080,178 | 3,081,299 | - | 92   | 94   | 0.97 | 64   | 77   | 0.82 |
| <i>yteQ</i> | 3,081,307 | 3,081,798 | - | 90   | 89   | 1.01 | 73   | 91   | 0.80 |
| <i>yteP</i> | 3,081,893 | 3,082,273 | - | 35   | 39   | 0.90 | 34   | 35   | 0.95 |
| <i>ytdP</i> | 3,082,489 | 3,084,807 | + | 113  | 116  | 0.97 | 111  | 107  | 1.04 |
| <i>ytcQ</i> | 3,084,848 | 3,086,317 | - | 162  | 141  | 1.15 | 110  | 111  | 0.99 |
| <i>ytcP</i> | 3,086,370 | 3,087,230 | - | 90   | 89   | 1.01 | 55   | 61   | 0.90 |
| <i>ytbQ</i> | 3,087,437 | 3,088,042 | - | 1068 | 1032 | 1.03 | 1360 | 1324 | 1.03 |
| <i>bioI</i> | 3,088,275 | 3,089,462 | - | 947  | 1003 | 0.95 | 1557 | 1506 | 1.03 |
| <i>bioB</i> | 3,089,531 | 3,090,538 | - | 1838 | 1844 | 1.00 | 2687 | 2663 | 1.01 |
| <i>bioD</i> | 3,090,541 | 3,091,236 | - | 1955 | 1814 | 1.08 | 2442 | 2271 | 1.07 |
| <i>bioF</i> | 3,091,233 | 3,092,402 | - | 3341 | 3116 | 1.07 | 3686 | 3391 | 1.09 |
| <i>bioA</i> | 3,092,392 | 3,093,738 | - | 3169 | 2931 | 1.08 | 3215 | 2990 | 1.08 |
| <i>bioW</i> | 3,093,728 | 3,094,507 | - | 2557 | 2393 | 1.07 | 2960 | 2712 | 1.09 |
| <i>ytaP</i> | 3,094,714 | 3,095,613 | - | 68   | 73   | 0.93 | 69   | 72   | 0.95 |
| <i>msmR</i> | 3,095,831 | 3,096,865 | + | 88   | 92   | 0.96 | 84   | 102  | 0.83 |
| <i>msmE</i> | 3,096,899 | 3,098,179 | + | 82   | 103  | 0.80 | 86   | 116  | 0.74 |
| <i>amyD</i> | 3,098,172 | 3,099,083 | + | 57   | 74   | 0.77 | 65   | 85   | 0.77 |
| <i>amyC</i> | 3,099,080 | 3,099,910 | + | 74   | 84   | 0.88 | 69   | 93   | 0.74 |
| <i>meIA</i> | 3,099,930 | 3,101,228 | + | 137  | 143  | 0.96 | 154  | 182  | 0.85 |
| <i>ytwF</i> | 3,101,250 | 3,101,456 | - | 258  | 185  | 1.40 | 306  | 302  | 1.01 |
| <i>leuS</i> | 3,101,678 | 3,104,092 | - | 1016 | 838  | 1.21 | 1522 | 1450 | 1.05 |
| <i>ytrB</i> | 3,104,519 | 3,104,854 | - | 204  | 154  | 1.33 | 152  | 172  | 0.88 |
| <i>ytrA</i> | 3,105,259 | 3,106,044 | + | 251  | 192  | 1.31 | 287  | 229  | 1.26 |
| <i>ytrB</i> | 3,106,281 | 3,107,474 | - | 71   | 61   | 1.15 | 63   | 64   | 0.98 |
| <i>ytrA</i> | 3,107,669 | 3,108,409 | + | 356  | 330  | 1.08 | 445  | 514  | 0.87 |
| <i>ytrD</i> | 3,108,446 | 3,110,386 | - | 118  | 102  | 1.15 | 112  | 116  | 0.97 |
| <i>ytrC</i> | 3,110,376 | 3,111,137 | - | 104  | 93   | 1.11 | 101  | 112  | 0.90 |
| <i>ytrB</i> | 3,111,239 | 3,112,243 | - | 296  | 272  | 1.09 | 372  | 373  | 1.00 |
| <i>ytrA</i> | 3,112,236 | 3,112,931 | - | 223  | 213  | 1.05 | 240  | 265  | 0.90 |
| <i>ytrF</i> | 3,113,028 | 3,114,338 | - | 506  | 586  | 0.86 | 1042 | 1284 | 0.81 |
| <i>ytrE</i> | 3,114,328 | 3,115,023 | - | 333  | 346  | 0.96 | 619  | 810  | 0.76 |
| <i>ytrD</i> | 3,115,038 | 3,116,015 | - | 219  | 245  | 0.90 | 428  | 606  | 0.71 |
| <i>ytrC</i> | 3,116,045 | 3,117,031 | - | 241  | 250  | 0.96 | 412  | 592  | 0.70 |

Spo0A regulon

|              |           |           |   |      |      |      |      |      |      |                       |
|--------------|-----------|-----------|---|------|------|------|------|------|------|-----------------------|
| <i>ytrB</i>  | 3,117,025 | 3,117,903 | - | 265  | 279  | 0.95 | 394  | 584  | 0.67 |                       |
| <i>ytrA</i>  | 3,117,896 | 3,118,288 | - | 232  | 253  | 0.92 | 306  | 507  | 0.60 |                       |
| <i>ytzC</i>  | 3,118,614 | 3,118,886 | - | 137  | 138  | 1.00 | 90   | 67   | 1.34 |                       |
| <i>ytaQ</i>  | 3,119,048 | 3,120,016 | + | 308  | 332  | 0.93 | 411  | 568  | 0.72 |                       |
| <i>ytaB</i>  | 3,120,013 | 3,120,597 | + | 347  | 352  | 0.98 | 565  | 670  | 0.84 |                       |
| <i>ytpB</i>  | 3,120,587 | 3,121,690 | - | 1034 | 802  | 1.29 | 1139 | 905  | 1.26 |                       |
| <i>ytpA</i>  | 3,121,711 | 3,122,490 | - | 1326 | 966  | 1.37 | 1346 | 1117 | 1.20 |                       |
| <i>ytoA</i>  | 3,122,539 | 3,123,054 | + | 187  | 222  | 0.84 | 255  | 306  | 0.83 |                       |
| <i>ytmA</i>  | 3,123,299 | 3,124,690 | - | 437  | 392  | 1.11 | 783  | 810  | 0.97 |                       |
| <i>asnB</i>  | 3,124,826 | 3,126,724 | - | 674  | 528  | 1.28 | 1193 | 1266 | 0.94 |                       |
| <i>metK</i>  | 3,126,874 | 3,128,076 | - | 1042 | 993  | 1.05 | 1349 | 1595 | 0.85 |                       |
| <i>pckA</i>  | 3,128,579 | 3,130,162 | + | 156  | 164  | 0.95 | 177  | 232  | 0.76 |                       |
| <i>ytmB</i>  | 3,130,201 | 3,130,443 | - | 582  | 498  | 1.17 | 310  | 378  | 0.82 |                       |
| <i>ytmA</i>  | 3,130,495 | 3,131,268 | - | 189  | 151  | 1.26 | 200  | 193  | 1.04 |                       |
| <i>ytiA</i>  | 3,131,419 | 3,132,108 | + | 50   | 56   | 0.89 | 47   | 52   | 0.91 |                       |
| <i>ytiB</i>  | 3,132,105 | 3,132,422 | + | 36   | 42   | 0.86 | 27   | 29   | 0.95 |                       |
| <i>ytiC</i>  | 3,132,435 | 3,133,217 | + | 42   | 42   | 1.00 | 37   | 40   | 0.93 |                       |
| <i>ytiD</i>  | 3,133,192 | 3,134,004 | + | 38   | 41   | 0.92 | 35   | 35   | 0.99 |                       |
| <i>ytkD</i>  | 3,134,031 | 3,134,507 | - | 321  | 316  | 1.01 | 283  | 306  | 0.92 |                       |
| <i>ytkC</i>  | 3,134,716 | 3,135,120 | - | 144  | 129  | 1.12 | 71   | 62   | 1.15 |                       |
| <i>dps</i>   | 3,135,286 | 3,135,723 | - | 7707 | 8266 | 0.93 | 5264 | 4484 | 1.17 |                       |
| <i>ytkA</i>  | 3,135,986 | 3,136,423 | - | 1188 | 1022 | 1.16 | 670  | 554  | 1.21 |                       |
| <i>luxS</i>  | 3,136,543 | 3,137,016 | - | 1284 | 1179 | 1.09 | 1206 | 1055 | 1.14 |                       |
| <i>ytiA</i>  | 3,137,145 | 3,137,372 | + | 189  | 226  | 0.84 | 131  | 207  | 0.63 |                       |
| <i>ytiB</i>  | 3,137,369 | 3,137,932 | - | 785  | 737  | 1.07 | 707  | 786  | 0.90 |                       |
| <i>ytiA</i>  | 3,138,026 | 3,138,274 | - | 2348 | 1869 | 1.26 | 1786 | 804  | 2.22 |                       |
| <i>ythA</i>  | 3,138,494 | 3,139,810 | + | 65   | 67   | 0.97 | 49   | 60   | 0.82 |                       |
| <i>ythB</i>  | 3,139,854 | 3,140,894 | + | 55   | 51   | 1.08 | 56   | 52   | 1.06 |                       |
| <i>ythC</i>  | 3,140,943 | 3,141,110 | + | 126  | 113  | 1.11 | 87   | 118  | 0.74 |                       |
| <i>mntD</i>  | 3,141,125 | 3,142,012 | - | 1857 | 1620 | 1.15 | 2162 | 1884 | 1.15 |                       |
| <i>mntC</i>  | 3,142,002 | 3,143,309 | - | 2561 | 2207 | 1.16 | 3102 | 2773 | 1.12 |                       |
| <i>mntB</i>  | 3,143,315 | 3,144,067 | - | 2709 | 2277 | 1.19 | 3461 | 3221 | 1.07 |                       |
| <i>mntA</i>  | 3,144,086 | 3,145,006 | - | 2674 | 1984 | 1.35 | 3708 | 3576 | 1.04 |                       |
| <i>menC</i>  | 3,145,286 | 3,146,401 | - | 1104 | 749  | 1.47 | 637  | 423  | 1.50 |                       |
| <i>menE</i>  | 3,146,398 | 3,147,858 | - | 1108 | 816  | 1.36 | 696  | 499  | 1.40 |                       |
| <i>menB</i>  | 3,147,949 | 3,148,764 | - | 2420 | 2034 | 1.19 | 2204 | 1824 | 1.21 |                       |
| <i>ytxM</i>  | 3,148,799 | 3,149,623 | - | 578  | 400  | 1.44 | 555  | 410  | 1.35 |                       |
| <i>menD</i>  | 3,149,611 | 3,151,353 | - | 400  | 287  | 1.40 | 440  | 361  | 1.22 |                       |
| <i>menF</i>  | 3,151,350 | 3,152,765 | - | 466  | 336  | 1.39 | 673  | 619  | 1.09 |                       |
| <i>yteA</i>  | 3,153,054 | 3,153,773 | + | 35   | 40   | 0.89 | 33   | 37   | 0.87 |                       |
| <i>ytdA</i>  | 3,153,782 | 3,154,600 | - | 68   | 64   | 1.06 | 61   | 63   | 0.96 |                       |
| <i>ytcA</i>  | 3,154,772 | 3,156,058 | + | 105  | 101  | 1.04 | 65   | 76   | 0.85 |                       |
| <i>ytcB</i>  | 3,156,055 | 3,157,005 | + | 44   | 45   | 0.99 | 36   | 43   | 0.82 |                       |
| <i>ytcC</i>  | 3,157,008 | 3,158,231 | + | 40   | 43   | 0.94 | 35   | 38   | 0.91 |                       |
| <i>ytxO</i>  | 3,158,305 | 3,158,736 | - | 48   | 59   | 0.81 | 56   | 54   | 1.03 |                       |
| <i>cotS</i>  | 3,158,738 | 3,159,793 | - | 127  | 138  | 0.92 | 123  | 144  | 0.86 |                       |
| <i>cotSA</i> | 3,159,808 | 3,160,941 | - | 156  | 148  | 1.05 | 127  | 138  | 0.92 |                       |
| <i>ytaA</i>  | 3,161,131 | 3,162,204 | + | 37   | 42   | 0.87 | 38   | 41   | 0.94 |                       |
| <i>ytaB</i>  | 3,162,284 | 3,162,751 | + | 1025 | 720  | 1.42 | 429  | 170  | 2.53 |                       |
| <i>glgP</i>  | 3,162,782 | 3,165,178 | - | 100  | 96   | 1.04 | 111  | 112  | 0.99 |                       |
| <i>glgA</i>  | 3,165,165 | 3,166,619 | - | 114  | 113  | 1.01 | 118  | 129  | 0.92 |                       |
| <i>glgD</i>  | 3,166,616 | 3,167,647 | - | 92   | 91   | 1.01 | 96   | 100  | 0.96 |                       |
| <i>glgC</i>  | 3,167,671 | 3,168,813 | - | 67   | 65   | 1.02 | 69   | 75   | 0.92 |                       |
| <i>glgB</i>  | 3,168,810 | 3,170,693 | - | 49   | 55   | 0.89 | 49   | 57   | 0.86 |                       |
| <i>yuaJ</i>  | 3,178,345 | 3,178,923 | + | 1058 | 1147 | 0.92 | 939  | 985  | 0.95 |                       |
| <i>yuaI</i>  | 3,178,965 | 3,179,486 | - | 1572 | 1521 | 1.03 | 1867 | 2009 | 0.93 |                       |
| <i>yuaG</i>  | 3,179,504 | 3,181,033 | - | 1603 | 1533 | 1.05 | 2194 | 2426 | 0.90 |                       |
| <i>yuaF</i>  | 3,181,054 | 3,181,578 | - | 964  | 880  | 1.10 | 1301 | 1521 | 0.86 |                       |
| <i>yuaE</i>  | 3,181,746 | 3,182,234 | + | 634  | 607  | 1.05 | 908  | 926  | 0.98 |                       |
| <i>yuaD</i>  | 3,182,240 | 3,182,818 | - | 488  | 404  | 1.21 | 541  | 473  | 1.14 |                       |
| <i>gbsB</i>  | 3,182,906 | 3,184,117 | - | 96   | 98   | 0.97 | 126  | 135  | 0.93 |                       |
| <i>gbsA</i>  | 3,184,131 | 3,185,603 | - | 129  | 138  | 0.94 | 141  | 171  | 0.82 |                       |
| <i>yuaC</i>  | 3,185,802 | 3,186,344 | + | 84   | 84   | 1.00 | 135  | 206  | 0.66 |                       |
| <i>yuaB</i>  | 3,186,542 | 3,187,087 | + | 542  | 398  | 1.36 | 705  | 533  | 1.32 | AbrB regulon          |
| <i>yuaA</i>  | 3,187,453 | 3,188,121 | + | 144  | 133  | 1.08 | 143  | 144  | 0.99 |                       |
| <i>yubG</i>  | 3,188,128 | 3,189,465 | + | 123  | 109  | 1.12 | 119  | 119  | 1.00 |                       |
| <i>yubF</i>  | 3,189,501 | 3,189,764 | - | 1172 | 1290 | 0.91 | 2172 | 2097 | 1.04 |                       |
| <i>yubE</i>  | 3,189,873 | 3,190,721 | - | 181  | 194  | 0.93 | 254  | 316  | 0.81 |                       |
| <i>yubD</i>  | 3,190,882 | 3,192,417 | - | 316  | 254  | 1.24 | 210  | 218  | 0.96 |                       |
| <i>yubC</i>  | 3,192,902 | 3,193,387 | + | 26   | 30   | 0.86 | 29   | 31   | 0.94 |                       |
| <i>yubB</i>  | 3,193,674 | 3,194,504 | - | 353  | 300  | 1.18 | 542  | 499  | 1.09 |                       |
| <i>yubA</i>  | 3,194,597 | 3,195,763 | - | 506  | 408  | 1.24 | 507  | 529  | 0.96 |                       |
| <i>yulF</i>  | 3,195,945 | 3,196,931 | + | 405  | 338  | 1.20 | 585  | 544  | 1.07 |                       |
| <i>yulE</i>  | 3,196,972 | 3,198,246 | - | 80   | 85   | 0.94 | 82   | 91   | 0.90 |                       |
| <i>yulD</i>  | 3,198,272 | 3,198,586 | - | 69   | 67   | 1.03 | 93   | 91   | 1.02 |                       |
| <i>yulC</i>  | 3,198,604 | 3,200,061 | - | 155  | 141  | 1.10 | 188  | 204  | 0.92 |                       |
| <i>yulB</i>  | 3,200,066 | 3,200,842 | - | 167  | 157  | 1.06 | 204  | 210  | 0.97 |                       |
| <i>yuxG</i>  | 3,200,899 | 3,202,968 | - | 78   | 86   | 0.91 | 83   | 106  | 0.78 |                       |
| <i>tlpB</i>  | 3,203,106 | 3,205,094 | - | 906  | 678  | 1.34 | 853  | 544  | 1.57 | SigD regulon          |
| <i>mcpA</i>  | 3,205,208 | 3,207,193 | - | 2341 | 2982 | 0.79 | 1699 | 1948 | 0.87 | SigD regulon          |
| <i>tlpA</i>  | 3,207,319 | 3,209,307 | - | 778  | 790  | 0.98 | 698  | 701  | 1.00 | AbrB and SigD regulon |
| <i>mcpB</i>  | 3,209,484 | 3,211,472 | - | 2298 | 2752 | 0.84 | 1389 | 1540 | 0.90 | SigD regulon          |
| <i>igl</i>   | 3,211,630 | 3,212,367 | + | 63   | 68   | 0.93 | 63   | 66   | 0.95 |                       |
| <i>yugU</i>  | 3,212,892 | 3,213,320 | - | 1669 | 1352 | 1.23 | 917  | 529  | 1.73 |                       |
| <i>yugT</i>  | 3,213,410 | 3,215,074 | - | 79   | 72   | 1.10 | 76   | 76   | 1.01 |                       |
| <i>yugS</i>  | 3,215,201 | 3,216,505 | - | 66   | 75   | 0.88 | 61   | 70   | 0.87 |                       |
| <i>yugP</i>  | 3,216,533 | 3,217,210 | - | 207  | 218  | 0.95 | 258  | 284  | 0.91 |                       |
| <i>yugO</i>  | 3,217,562 | 3,218,878 | + | 195  | 130  | 1.50 | 64   | 68   | 0.95 |                       |
| <i>yugN</i>  | 3,218,875 | 3,219,279 | - | 211  | 235  | 0.90 | 175  | 212  | 0.83 |                       |
| <i>yugM</i>  | 3,219,339 | 3,219,710 | - | 270  | 321  | 0.84 | 300  | 327  | 0.92 |                       |
| <i>pgi</i>   | 3,219,769 | 3,221,124 | - | 1578 | 1506 | 1.05 | 2218 | 2032 | 1.09 |                       |

|             |           |           |   |      |      |      |      |      |      |              |
|-------------|-----------|-----------|---|------|------|------|------|------|------|--------------|
| <i>yugK</i> | 3,221,236 | 3,222,408 | - | 289  | 315  | 0.92 | 399  | 354  | 1.13 |              |
| <i>yugJ</i> | 3,222,512 | 3,223,675 | - | 1650 | 1887 | 0.87 | 1776 | 1669 | 1.06 |              |
| <i>yuzA</i> | 3,223,905 | 3,224,141 | + | 735  | 485  | 1.52 | 429  | 174  | 2.46 |              |
| <i>yugI</i> | 3,224,219 | 3,224,611 | - | 2049 | 1972 | 1.04 | 2710 | 3103 | 0.87 |              |
| <i>alaT</i> | 3,224,813 | 3,225,973 | - | 1037 | 1050 | 0.99 | 1323 | 1609 | 0.82 |              |
| <i>alaR</i> | 3,225,974 | 3,226,474 | - | 1357 | 1458 | 0.93 | 1677 | 2049 | 0.82 |              |
| <i>yugF</i> | 3,226,622 | 3,227,443 | + | 80   | 70   | 1.15 | 64   | 66   | 0.98 |              |
| <i>yugE</i> | 3,227,472 | 3,227,738 | - | 294  | 233  | 1.26 | 323  | 289  | 1.12 |              |
| <i>patB</i> | 3,227,819 | 3,228,982 | + | 260  | 312  | 0.84 | 398  | 541  | 0.73 |              |
| <i>kinB</i> | 3,229,108 | 3,230,397 | + | 261  | 145  | 1.80 | 271  | 250  | 1.08 |              |
| <i>kapB</i> | 3,230,443 | 3,230,829 | + | 559  | 397  | 1.41 | 835  | 713  | 1.17 |              |
| <i>kapD</i> | 3,230,856 | 3,231,473 | - | 123  | 106  | 1.17 | 130  | 143  | 0.91 |              |
| <i>yuxJ</i> | 3,231,684 | 3,232,862 | + | 106  | 101  | 1.05 | 93   | 92   | 1.01 |              |
| <i>pbpD</i> | 3,232,955 | 3,234,829 | + | 577  | 511  | 1.13 | 700  | 710  | 0.99 |              |
| <i>yuxK</i> | 3,234,850 | 3,235,263 | + | 366  | 290  | 1.26 | 404  | 387  | 1.04 |              |
| <i>yufK</i> | 3,235,466 | 3,236,080 | - | 140  | 121  | 1.16 | 166  | 178  | 0.93 |              |
| <i>yufL</i> | 3,236,201 | 3,237,802 | + | 443  | 419  | 1.06 | 393  | 407  | 0.97 |              |
| <i>yufM</i> | 3,237,795 | 3,238,502 | + | 572  | 434  | 1.32 | 516  | 498  | 1.03 |              |
| <i>yufN</i> | 3,239,001 | 3,240,053 | + | 2053 | 2004 | 1.02 | 1649 | 1561 | 1.06 |              |
| <i>yufO</i> | 3,240,129 | 3,241,661 | + | 1005 | 873  | 1.15 | 934  | 779  | 1.20 |              |
| <i>yufP</i> | 3,241,654 | 3,242,700 | + | 730  | 569  | 1.28 | 626  | 509  | 1.23 |              |
| <i>yufQ</i> | 3,242,701 | 3,243,660 | + | 494  | 385  | 1.28 | 400  | 347  | 1.15 |              |
| <i>maeN</i> | 3,243,814 | 3,245,160 | + | 104  | 109  | 0.95 | 99   | 99   | 1.00 |              |
| <i>yufS</i> | 3,245,196 | 3,245,411 | - | 64   | 56   | 1.14 | 49   | 56   | 0.88 |              |
| <i>mrpA</i> | 3,245,723 | 3,248,047 | + | 400  | 361  | 1.11 | 571  | 591  | 0.97 |              |
| <i>mrpB</i> | 3,248,040 | 3,248,471 | + | 375  | 338  | 1.11 | 618  | 586  | 1.06 |              |
| <i>mrpC</i> | 3,248,471 | 3,248,812 | + | 256  | 238  | 1.08 | 392  | 360  | 1.09 |              |
| <i>mrpD</i> | 3,248,805 | 3,250,286 | + | 386  | 356  | 1.08 | 589  | 555  | 1.06 |              |
| <i>mrpE</i> | 3,250,292 | 3,250,768 | + | 344  | 337  | 1.02 | 515  | 448  | 1.15 |              |
| <i>mrpF</i> | 3,250,768 | 3,251,052 | + | 201  | 207  | 0.97 | 309  | 244  | 1.27 |              |
| <i>mrpG</i> | 3,251,036 | 3,251,410 | + | 183  | 178  | 1.03 | 208  | 208  | 1.00 |              |
| <i>yuxO</i> | 3,251,449 | 3,251,829 | - | 305  | 263  | 1.16 | 519  | 514  | 1.01 |              |
| <i>comA</i> | 3,251,848 | 3,252,492 | - | 611  | 550  | 1.11 | 1182 | 1243 | 0.95 |              |
| <i>comP</i> | 3,252,573 | 3,254,882 | - | 885  | 805  | 1.10 | 661  | 809  | 0.82 |              |
| <i>comX</i> | 3,254,897 | 3,255,064 | - | 1691 | 1691 | 1.00 | 1416 | 1655 | 0.86 |              |
| <i>comQ</i> | 3,255,052 | 3,255,951 | - | 668  | 680  | 0.98 | 633  | 628  | 1.01 |              |
| <i>yuzC</i> | 3,256,737 | 3,257,105 | + | 122  | 128  | 0.95 | 100  | 141  | 0.71 |              |
| <i>yuxH</i> | 3,257,081 | 3,258,310 | - | 517  | 481  | 1.07 | 446  | 478  | 0.93 |              |
| <i>yueK</i> | 3,258,447 | 3,259,919 | - | 1447 | 1430 | 1.01 | 1782 | 1697 | 1.05 |              |
| <i>yueJ</i> | 3,259,935 | 3,260,486 | - | 1244 | 1259 | 0.99 | 1348 | 1326 | 1.02 |              |
| <i>yueI</i> | 3,260,583 | 3,260,981 | - | 467  | 348  | 1.34 | 496  | 490  | 1.01 |              |
| <i>yueH</i> | 3,261,053 | 3,261,301 | - | 426  | 352  | 1.21 | 467  | 436  | 1.07 |              |
| <i>yueG</i> | 3,261,374 | 3,261,595 | - | 158  | 125  | 1.26 | 275  | 223  | 1.23 |              |
| <i>yueF</i> | 3,261,655 | 3,262,764 | - | 383  | 306  | 1.25 | 407  | 384  | 1.06 |              |
| <i>yuzE</i> | 3,262,879 | 3,263,268 | + | 45   | 46   | 0.98 | 51   | 58   | 0.89 |              |
| <i>yuzF</i> | 3,263,309 | 3,263,545 | - | 727  | 850  | 0.85 | 401  | 423  | 0.95 |              |
| <i>yueE</i> | 3,263,722 | 3,264,252 | - | 1095 | 1282 | 0.85 | 709  | 731  | 0.97 |              |
| <i>yueD</i> | 3,264,450 | 3,265,181 | - | 650  | 618  | 1.05 | 1120 | 1028 | 1.09 |              |
| <i>yueC</i> | 3,265,244 | 3,265,699 | - | 541  | 522  | 1.04 | 1205 | 1108 | 1.09 |              |
| <i>yueB</i> | 3,265,731 | 3,268,961 | - | 410  | 411  | 1.00 | 1282 | 1168 | 1.10 |              |
| <i>yukA</i> | 3,268,958 | 3,272,581 | - | 347  | 292  | 1.19 | 885  | 770  | 1.15 |              |
| <i>yukB</i> | 3,272,581 | 3,273,456 | - | 347  | 255  | 1.36 | 678  | 645  | 1.05 |              |
| <i>yukC</i> | 3,273,484 | 3,274,839 | - | 400  | 312  | 1.28 | 714  | 682  | 1.05 |              |
| <i>yukD</i> | 3,274,854 | 3,275,093 | - | 530  | 453  | 1.17 | 848  | 753  | 1.13 |              |
| <i>yukE</i> | 3,275,237 | 3,275,479 | - | 7699 | 7361 | 1.05 | 6844 | 6049 | 1.13 |              |
| <i>yukF</i> | 3,275,976 | 3,277,280 | + | 201  | 171  | 1.18 | 311  | 256  | 1.22 |              |
| <i>ald</i>  | 3,277,348 | 3,278,484 | + | 1044 | 1684 | 0.62 | 402  | 772  | 0.52 |              |
| <i>yuxI</i> | 3,278,597 | 3,278,920 | + | 874  | 1142 | 0.77 | 608  | 628  | 0.97 |              |
| <i>yukJ</i> | 3,278,838 | 3,279,275 | + | 289  | 382  | 0.76 | 365  | 284  | 1.28 |              |
| <i>dhbF</i> | 3,279,544 | 3,286,680 | - | 457  | 671  | 0.68 | 289  | 429  | 0.67 | AbrB regulon |
| <i>dhbB</i> | 3,286,700 | 3,287,638 | - | 362  | 526  | 0.69 | 215  | 362  | 0.60 | AbrB regulon |
| <i>dhbE</i> | 3,287,666 | 3,289,285 | - | 336  | 427  | 0.79 | 200  | 322  | 0.62 | AbrB regulon |
| <i>dhbC</i> | 3,289,314 | 3,290,510 | - | 468  | 557  | 0.84 | 228  | 375  | 0.61 | AbrB regulon |
| <i>dhbA</i> | 3,290,536 | 3,291,321 | - | 452  | 506  | 0.89 | 212  | 358  | 0.59 | AbrB regulon |
| <i>yuiI</i> | 3,291,515 | 3,292,459 | - | 738  | 689  | 1.07 | 428  | 594  | 0.72 | AbrB regulon |
| <i>yuiH</i> | 3,292,598 | 3,293,194 | - | 168  | 136  | 1.24 | 164  | 158  | 1.04 |              |
| <i>yuiG</i> | 3,293,295 | 3,293,897 | + | 1500 | 1399 | 1.07 | 1906 | 1549 | 1.23 |              |
| <i>yuiF</i> | 3,293,967 | 3,295,295 | - | 478  | 381  | 1.26 | 531  | 642  | 0.83 |              |
| <i>yuiE</i> | 3,295,442 | 3,296,944 | - | 742  | 681  | 1.09 | 889  | 846  | 1.05 |              |
| <i>yuiD</i> | 3,297,102 | 3,297,578 | + | 272  | 316  | 0.86 | 217  | 172  | 1.26 |              |
| <i>yuiC</i> | 3,297,609 | 3,298,265 | - | 220  | 275  | 0.80 | 229  | 374  | 0.61 |              |
| <i>yuiB</i> | 3,298,369 | 3,298,689 | - | 1026 | 1245 | 0.82 | 748  | 1035 | 0.72 |              |
| <i>yuiA</i> | 3,298,743 | 3,298,886 | - | 2780 | 3625 | 0.77 | 1398 | 1921 | 0.73 |              |
| <i>yumB</i> | 3,299,059 | 3,300,279 | - | 512  | 509  | 1.01 | 414  | 460  | 0.90 |              |
| <i>yumC</i> | 3,300,611 | 3,301,609 | + | 1055 | 1096 | 0.96 | 1211 | 1742 | 0.70 |              |
| <i>guaC</i> | 3,302,067 | 3,303,047 | + | 372  | 377  | 0.99 | 147  | 170  | 0.86 |              |
| <i>paiB</i> | 3,303,121 | 3,303,744 | - | 183  | 207  | 0.89 | 199  | 275  | 0.72 |              |
| <i>paiA</i> | 3,303,768 | 3,304,286 | - | 98   | 126  | 0.78 | 127  | 194  | 0.65 |              |
| <i>yuiM</i> | 3,304,624 | 3,304,986 | - | 1882 | 1876 | 1.00 | 1914 | 1871 | 1.02 |              |
| <i>dapF</i> | 3,305,065 | 3,305,919 | - | 326  | 409  | 0.80 | 385  | 459  | 0.84 |              |
| <i>yuiK</i> | 3,306,042 | 3,307,256 | - | 66   | 78   | 0.85 | 98   | 98   | 1.00 |              |
| <i>yuzB</i> | 3,307,393 | 3,307,629 | - | 30   | 36   | 0.83 | 62   | 68   | 0.91 |              |
| <i>yutJ</i> | 3,307,892 | 3,308,884 | + | 973  | 1107 | 0.88 | 998  | 1232 | 0.81 |              |
| <i>yuzD</i> | 3,308,986 | 3,309,312 | - | 275  | 279  | 0.99 | 266  | 328  | 0.81 |              |
| <i>yutI</i> | 3,309,412 | 3,309,747 | + | 990  | 1185 | 0.84 | 992  | 1068 | 0.93 |              |
| <i>yuxL</i> | 3,309,789 | 3,311,762 | - | 126  | 153  | 0.82 | 141  | 172  | 0.82 |              |
| <i>thrB</i> | 3,311,870 | 3,312,799 | - | 1964 | 2284 | 0.86 | 2490 | 2717 | 0.92 |              |
| <i>thrC</i> | 3,312,796 | 3,313,854 | - | 2617 | 3105 | 0.84 | 3157 | 3448 | 0.92 |              |
| <i>hom</i>  | 3,313,854 | 3,315,155 | - | 1607 | 2198 | 0.73 | 1882 | 2299 | 0.82 |              |
| <i>yutH</i> | 3,315,356 | 3,316,375 | - | 115  | 113  | 1.02 | 134  | 132  | 1.02 |              |
| <i>yutG</i> | 3,316,528 | 3,317,028 | + | 59   | 57   | 1.03 | 42   | 51   | 0.81 |              |

|              |           |           |   |      |      |      |      |      |      |               |
|--------------|-----------|-----------|---|------|------|------|------|------|------|---------------|
| <i>yutF</i>  | 3,317,055 | 3,317,825 | - | 621  | 658  | 0.94 | 998  | 943  | 1.06 |               |
| <i>yutE</i>  | 3,317,854 | 3,318,288 | - | 699  | 700  | 1.00 | 1014 | 971  | 1.04 |               |
| <i>yutD</i>  | 3,318,312 | 3,318,620 | - | 752  | 721  | 1.04 | 975  | 884  | 1.10 |               |
| <i>yutC</i>  | 3,318,702 | 3,319,334 | + | 80   | 71   | 1.14 | 72   | 68   | 1.07 |               |
| <i>lipA</i>  | 3,319,350 | 3,320,246 | - | 1393 | 1272 | 1.10 | 2334 | 2235 | 1.04 |               |
| <i>yunA</i>  | 3,320,412 | 3,321,461 | + | 80   | 80   | 0.99 | 69   | 78   | 0.89 |               |
| <i>yunB</i>  | 3,321,489 | 3,322,253 | - | 158  | 138  | 1.15 | 227  | 237  | 0.96 |               |
| <i>yunC</i>  | 3,322,326 | 3,322,631 | - | 400  | 349  | 1.15 | 519  | 528  | 0.98 |               |
| <i>yunD</i>  | 3,322,696 | 3,324,084 | - | 669  | 536  | 1.25 | 738  | 699  | 1.05 |               |
| <i>yunE</i>  | 3,324,104 | 3,324,925 | - | 573  | 500  | 1.15 | 647  | 616  | 1.05 |               |
| <i>yunF</i>  | 3,324,943 | 3,325,797 | - | 602  | 531  | 1.13 | 652  | 661  | 0.99 |               |
| <i>yunG</i>  | 3,325,829 | 3,326,176 | - | 452  | 441  | 1.02 | 392  | 397  | 0.99 |               |
| <i>pucH</i>  | 3,326,273 | 3,327,613 | - | 153  | 151  | 1.02 | 144  | 145  | 1.00 |               |
| <i>pucR</i>  | 3,327,788 | 3,329,383 | + | 130  | 123  | 1.06 | 105  | 102  | 1.03 |               |
| <i>pucJ</i>  | 3,329,528 | 3,330,877 | + | 106  | 103  | 1.03 | 99   | 104  | 0.95 |               |
| <i>pucK</i>  | 3,330,883 | 3,332,175 | + | 95   | 92   | 1.04 | 70   | 80   | 0.87 |               |
| <i>pucL</i>  | 3,332,188 | 3,333,672 | + | 122  | 116  | 1.05 | 110  | 114  | 0.96 |               |
| <i>pucM</i>  | 3,333,651 | 3,334,016 | + | 129  | 112  | 1.15 | 156  | 140  | 1.11 |               |
| <i>pucE</i>  | 3,334,777 | 3,335,298 | - | 86   | 77   | 1.11 | 62   | 70   | 0.88 |               |
| <i>pucD</i>  | 3,335,289 | 3,337,526 | - | 127  | 126  | 1.00 | 104  | 110  | 0.94 |               |
| <i>pucC</i>  | 3,337,527 | 3,338,360 | - | 70   | 72   | 0.97 | 54   | 60   | 0.90 |               |
| <i>pucB</i>  | 3,338,382 | 3,338,975 | - | 75   | 82   | 0.91 | 61   | 83   | 0.74 |               |
| <i>pucA</i>  | 3,338,972 | 3,339,964 | - | 65   | 72   | 0.91 | 50   | 64   | 0.77 |               |
| <i>yurG</i>  | 3,340,193 | 3,341,443 | - | 246  | 252  | 0.98 | 225  | 254  | 0.88 |               |
| <i>yurH</i>  | 3,341,460 | 3,342,698 | - | 155  | 171  | 0.90 | 137  | 172  | 0.80 |               |
| <i>yurI</i>  | 3,343,140 | 3,344,006 | + | 336  | 329  | 1.02 | 304  | 337  | 0.90 | AbrB regulon  |
| <i>yurJ</i>  | 3,344,040 | 3,345,143 | - | 243  | 871  | 0.28 | 276  | 838  | 0.33 |               |
| <i>yurK</i>  | 3,345,325 | 3,346,053 | + | 232  | 412  | 0.56 | 236  | 631  | 0.37 |               |
| <i>yurL</i>  | 3,346,078 | 3,346,932 | - | 184  | 792  | 0.23 | 170  | 623  | 0.27 |               |
| <i>yurM</i>  | 3,346,946 | 3,347,848 | - | 131  | 594  | 0.22 | 123  | 452  | 0.27 |               |
| <i>yurN</i>  | 3,347,852 | 3,348,730 | - | 134  | 667  | 0.20 | 105  | 596  | 0.18 |               |
| <i>yurO</i>  | 3,348,788 | 3,350,056 | - | 254  | 1360 | 0.19 | 241  | 1391 | 0.17 |               |
| <i>yurP</i>  | 3,350,137 | 3,351,123 | - | 718  | 3521 | 0.20 | 765  | 3166 | 0.24 |               |
| <i>yurQ</i>  | 3,351,339 | 3,351,713 | - | 297  | 303  | 0.98 | 644  | 635  | 1.01 |               |
| <i>yurR</i>  | 3,351,816 | 3,352,934 | - | 475  | 405  | 1.17 | 487  | 480  | 1.01 |               |
| <i>yurS</i>  | 3,353,239 | 3,353,514 | + | 27   | 36   | 0.75 | 24   | 26   | 0.91 |               |
| <i>yurT</i>  | 3,353,578 | 3,353,961 | - | 206  | 173  | 1.19 | 366  | 384  | 0.95 |               |
| <i>yurU</i>  | 3,354,620 | 3,356,017 | - | 2662 | 2809 | 0.95 | 3200 | 3330 | 0.96 |               |
| <i>yurV</i>  | 3,356,038 | 3,356,481 | - | 2894 | 2955 | 0.98 | 3317 | 3265 | 1.02 |               |
| <i>csd</i>   | 3,356,471 | 3,357,691 | - | 2424 | 2416 | 1.00 | 2886 | 2967 | 0.97 |               |
| <i>yurX</i>  | 3,357,691 | 3,359,004 | - | 3263 | 3159 | 1.03 | 3667 | 3760 | 0.98 |               |
| <i>yurY</i>  | 3,359,022 | 3,359,807 | - | 2652 | 2318 | 1.14 | 2707 | 3004 | 0.90 |               |
| <i>yurZ</i>  | 3,360,332 | 3,360,709 | - | 50   | 55   | 0.91 | 53   | 68   | 0.77 |               |
| <i>yusA</i>  | 3,360,794 | 3,361,618 | - | 1215 | 1553 | 0.78 | 2298 | 3110 | 0.74 |               |
| <i>yusB</i>  | 3,361,632 | 3,362,300 | - | 449  | 594  | 0.76 | 872  | 1357 | 0.64 |               |
| <i>yusC</i>  | 3,362,293 | 3,363,318 | - | 467  | 650  | 0.72 | 1004 | 1486 | 0.68 |               |
| <i>yusD</i>  | 3,363,645 | 3,363,989 | - | 377  | 337  | 1.12 | 390  | 409  | 0.95 |               |
| <i>yusE</i>  | 3,364,096 | 3,364,416 | - | 260  | 238  | 1.09 | 301  | 301  | 1.00 | Spo0A regulon |
| <i>yusF</i>  | 3,364,418 | 3,364,858 | - | 513  | 478  | 1.07 | 766  | 714  | 1.07 |               |
| <i>yusG</i>  | 3,364,858 | 3,365,094 | - | 1111 | 1182 | 0.94 | 1949 | 1855 | 1.05 |               |
| <i>gcvH</i>  | 3,365,150 | 3,365,533 | - | 4599 | 4725 | 0.97 | 5103 | 4623 | 1.10 |               |
| <i>yusI</i>  | 3,365,600 | 3,365,956 | - | 742  | 687  | 1.08 | 1609 | 1673 | 0.96 |               |
| <i>yusJ</i>  | 3,366,067 | 3,367,851 | - | 133  | 129  | 1.03 | 138  | 137  | 1.01 |               |
| <i>yusK</i>  | 3,367,866 | 3,369,041 | - | 186  | 190  | 0.98 | 189  | 220  | 0.86 |               |
| <i>yusL</i>  | 3,369,052 | 3,371,499 | - | 156  | 140  | 1.11 | 175  | 188  | 0.93 |               |
| <i>yusM</i>  | 3,371,767 | 3,372,675 | - | 74   | 74   | 1.01 | 52   | 66   | 0.79 |               |
| <i>yusN</i>  | 3,373,028 | 3,373,360 | + | 39   | 39   | 0.99 | 41   | 38   | 1.08 |               |
| <i>yusO</i>  | 3,373,519 | 3,373,986 | + | 495  | 442  | 1.12 | 558  | 564  | 0.99 |               |
| <i>yusP</i>  | 3,373,983 | 3,375,608 | + | 441  | 335  | 1.31 | 529  | 477  | 1.11 |               |
| <i>yusQ</i>  | 3,375,644 | 3,376,027 | - | 79   | 85   | 0.93 | 66   | 74   | 0.89 |               |
| <i>yusR</i>  | 3,376,046 | 3,376,435 | - | 100  | 104  | 0.96 | 82   | 94   | 0.87 |               |
| <i>yusS</i>  | 3,376,457 | 3,376,786 | - | 81   | 97   | 0.83 | 86   | 92   | 0.94 |               |
| <i>yusT</i>  | 3,376,920 | 3,377,807 | + | 103  | 119  | 0.87 | 89   | 109  | 0.81 |               |
| <i>yusU</i>  | 3,377,827 | 3,378,114 | - | 393  | 509  | 0.77 | 351  | 528  | 0.67 |               |
| <i>yusV</i>  | 3,378,139 | 3,378,966 | - | 806  | 1022 | 0.79 | 493  | 816  | 0.60 |               |
| <i>yusW</i>  | 3,379,184 | 3,379,621 | - | 105  | 109  | 0.96 | 136  | 174  | 0.78 |               |
| <i>yusX</i>  | 3,379,731 | 3,381,233 | - | 848  | 944  | 0.90 | 969  | 1060 | 0.91 |               |
| <i>yusY</i>  | 3,381,230 | 3,381,526 | - | 672  | 705  | 0.95 | 624  | 716  | 0.87 |               |
| <i>yusZ</i>  | 3,381,660 | 3,382,502 | + | 192  | 212  | 0.90 | 240  | 267  | 0.90 |               |
| <i>mrgA</i>  | 3,382,592 | 3,383,053 | + | 657  | 703  | 0.93 | 953  | 1220 | 0.78 |               |
| <i>yvtA</i>  | 3,383,097 | 3,384,473 | - | 1669 | 1271 | 1.31 | 2390 | 2808 | 0.85 |               |
| <i>cssR</i>  | 3,384,751 | 3,385,428 | + | 408  | 409  | 1.00 | 555  | 519  | 1.07 |               |
| <i>cssS</i>  | 3,385,425 | 3,386,780 | + | 607  | 568  | 1.07 | 818  | 805  | 1.02 |               |
| <i>yuxN</i>  | 3,387,140 | 3,388,015 | + | 232  | 190  | 1.22 | 262  | 290  | 0.90 |               |
| <i>citG</i>  | 3,388,051 | 3,389,439 | - | 1583 | 1947 | 0.81 | 2370 | 2609 | 0.91 |               |
| <i>gerAA</i> | 3,389,809 | 3,391,257 | + | 54   | 60   | 0.89 | 45   | 53   | 0.85 |               |
| <i>gerAB</i> | 3,391,226 | 3,392,323 | + | 26   | 33   | 0.78 | 31   | 34   | 0.92 |               |
| <i>gerAC</i> | 3,392,320 | 3,393,441 | + | 49   | 56   | 0.88 | 48   | 54   | 0.89 |               |
| <i>yvqC</i>  | 3,393,449 | 3,394,084 | - | 335  | 280  | 1.20 | 470  | 382  | 0.97 |               |
| <i>yvqE</i>  | 3,394,062 | 3,395,144 | - | 344  | 293  | 1.17 | 367  | 414  | 0.89 |               |
| <i>yvqF</i>  | 3,395,141 | 3,395,866 | - | 303  | 266  | 1.14 | 315  | 346  | 0.91 |               |
| <i>yvqG</i>  | 3,395,900 | 3,396,622 | - | 289  | 260  | 1.11 | 371  | 450  | 0.83 |               |
| <i>yvqH</i>  | 3,396,872 | 3,397,549 | - | 309  | 223  | 1.39 | 513  | 261  | 1.97 |               |
| <i>yvqI</i>  | 3,397,576 | 3,397,956 | - | 205  | 129  | 1.59 | 237  | 146  | 1.63 |               |
| <i>yvqJ</i>  | 3,398,118 | 3,399,386 | - | 297  | 289  | 1.03 | 323  | 305  | 1.06 | AbrB regulon  |
| <i>yvqK</i>  | 3,399,563 | 3,400,144 | - | 213  | 210  | 1.01 | 299  | 313  | 0.96 |               |
| <i>yvrA</i>  | 3,400,167 | 3,401,495 | - | 282  | 255  | 1.11 | 389  | 403  | 0.97 |               |
| <i>yvrB</i>  | 3,401,495 | 3,402,556 | - | 158  | 157  | 1.01 | 249  | 256  | 0.97 |               |
| <i>yvrC</i>  | 3,402,519 | 3,403,463 | - | 575  | 605  | 0.95 | 840  | 944  | 0.89 |               |
| <i>yvrD</i>  | 3,403,861 | 3,404,652 | + | 365  | 371  | 0.98 | 522  | 511  | 1.02 |               |
| <i>yvrE</i>  | 3,404,690 | 3,405,568 | - | 2214 | 1738 | 1.27 | 1315 | 803  | 1.64 |               |



|              |           |           |   |      |      |      |      |      |      |                        |
|--------------|-----------|-----------|---|------|------|------|------|------|------|------------------------|
| <i>yvrG</i>  | 3,405,640 | 3,407,361 | - | 582  | 406  | 1.44 | 818  | 709  | 1.15 |                        |
| <i>yvrH</i>  | 3,407,379 | 3,408,488 | - | 157  | 154  | 1.02 | 158  | 161  | 0.99 |                        |
| <i>yvrI</i>  | 3,408,492 | 3,409,067 | - | 65   | 83   | 0.78 | 73   | 86   | 0.86 |                        |
| <i>oxdC</i>  | 3,409,496 | 3,410,653 | + | 465  | 988  | 0.47 | 437  | 803  | 0.54 |                        |
| <i>yvrL</i>  | 3,410,714 | 3,411,124 | + | 62   | 89   | 0.69 | 80   | 111  | 0.71 |                        |
| <i>yvrN</i>  | 3,411,158 | 3,412,408 | - | 908  | 801  | 1.13 | 1214 | 1279 | 0.95 | AbrB regulon           |
| <i>yvrO</i>  | 3,412,380 | 3,413,069 | - | 1081 | 979  | 1.10 | 1499 | 1674 | 0.90 | AbrB regulon           |
| <i>yvrP</i>  | 3,413,053 | 3,414,246 | - | 912  | 1028 | 0.89 | 1198 | 1517 | 0.79 | AbrB regulon           |
| <i>fluC</i>  | 3,414,417 | 3,415,226 | - | 572  | 561  | 1.02 | 487  | 600  | 0.81 |                        |
| <i>fluG</i>  | 3,415,242 | 3,416,252 | - | 343  | 299  | 1.15 | 259  | 315  | 0.82 |                        |
| <i>fluB</i>  | 3,416,252 | 3,417,406 | - | 335  | 327  | 1.02 | 217  | 299  | 0.73 |                        |
| <i>fluD</i>  | 3,417,504 | 3,418,451 | + | 1721 | 2134 | 0.81 | 851  | 1295 | 0.66 |                        |
| <i>yvsH</i>  | 3,418,686 | 3,420,095 | - | 275  | 229  | 1.20 | 496  | 559  | 0.89 |                        |
| <i>sspJ</i>  | 3,420,495 | 3,420,635 | - | 81   | 79   | 1.03 | 65   | 47   | 1.38 |                        |
| <i>yvsG</i>  | 3,420,802 | 3,421,284 | + | 137  | 103  | 1.33 | 159  | 148  | 1.07 |                        |
| <i>yvgJ</i>  | 3,421,384 | 3,423,237 | + | 236  | 165  | 1.43 | 353  | 281  | 1.26 |                        |
| <i>yvgK</i>  | 3,423,265 | 3,424,191 | - | 589  | 520  | 1.13 | 592  | 528  | 1.12 |                        |
| <i>yvgL</i>  | 3,424,302 | 3,425,084 | + | 194  | 174  | 1.12 | 169  | 202  | 0.83 |                        |
| <i>yvgM</i>  | 3,425,188 | 3,425,748 | + | 99   | 97   | 1.02 | 107  | 128  | 0.84 |                        |
| <i>yvgN</i>  | 3,425,779 | 3,426,609 | - | 1567 | 1784 | 0.88 | 1725 | 1800 | 0.96 |                        |
| <i>yvgO</i>  | 3,426,832 | 3,427,317 | + | 4318 | 2901 | 1.49 | 2800 | 1150 | 2.43 | AbrB regulon           |
| <i>yvgP</i>  | 3,427,361 | 3,429,373 | - | 559  | 439  | 1.27 | 667  | 623  | 1.07 |                        |
| <i>yvgQ</i>  | 3,429,628 | 3,431,343 | - | 2419 | 2402 | 1.01 | 2770 | 2931 | 0.95 |                        |
| <i>yvgR</i>  | 3,431,369 | 3,433,186 | - | 1754 | 1665 | 1.05 | 2283 | 2510 | 0.91 |                        |
| <i>yvgS</i>  | 3,433,357 | 3,435,681 | - | 316  | 243  | 1.30 | 440  | 356  | 1.23 |                        |
| <i>yvgT</i>  | 3,435,879 | 3,436,487 | - | 153  | 167  | 0.92 | 141  | 164  | 0.86 |                        |
| <i>bdbC</i>  | 3,436,674 | 3,437,090 | - | 928  | 856  | 1.08 | 716  | 787  | 0.91 |                        |
| <i>bdbD</i>  | 3,437,095 | 3,437,763 | - | 1716 | 1568 | 1.09 | 1213 | 1339 | 0.91 |                        |
| <i>yvgW</i>  | 3,437,883 | 3,439,991 | - | 1052 | 1363 | 0.77 | 455  | 537  | 0.85 |                        |
| <i>yvgX</i>  | 3,440,151 | 3,442,562 | - | 2606 | 1848 | 1.41 | 730  | 776  | 0.94 |                        |
| <i>yvgY</i>  | 3,442,643 | 3,442,852 | - | 2055 | 1499 | 1.37 | 540  | 528  | 1.02 |                        |
| <i>yvgZ</i>  | 3,442,926 | 3,443,231 | - | 920  | 759  | 1.21 | 573  | 433  | 1.32 |                        |
| <i>yvaA</i>  | 3,443,359 | 3,444,435 | + | 4330 | 4405 | 0.98 | 3472 | 2943 | 1.18 |                        |
| <i>yvaB</i>  | 3,444,472 | 3,445,107 | - | 548  | 1245 | 0.44 | 686  | 1607 | 0.43 |                        |
| <i>yvaC</i>  | 3,445,267 | 3,447,162 | - | 84   | 86   | 0.98 | 68   | 78   | 0.87 |                        |
| <i>yvaD</i>  | 3,447,325 | 3,447,726 | - | 89   | 94   | 0.95 | 119  | 113  | 1.05 |                        |
| <i>yvaE</i>  | 3,447,723 | 3,448,082 | - | 198  | 205  | 0.97 | 183  | 179  | 1.02 |                        |
| <i>yvaF</i>  | 3,448,079 | 3,448,651 | - | 150  | 154  | 0.98 | 150  | 152  | 0.99 |                        |
| <i>yvaG</i>  | 3,448,762 | 3,449,556 | - | 407  | 362  | 1.13 | 389  | 309  | 1.26 |                        |
| <i>smpB</i>  | 3,450,278 | 3,450,748 | - | 1957 | 1154 | 1.70 | 998  | 1145 | 0.87 |                        |
| <i>rnr</i>   | 3,450,893 | 3,453,232 | - | 3236 | 2006 | 1.61 | 1472 | 1101 | 1.34 |                        |
| <i>yvaK</i>  | 3,453,251 | 3,453,997 | - | 2104 | 1437 | 1.46 | 1440 | 1074 | 1.34 |                        |
| <i>secG</i>  | 3,454,123 | 3,454,353 | - | 1787 | 2022 | 0.88 | 1076 | 1190 | 0.90 |                        |
| <i>yvaM</i>  | 3,454,502 | 3,455,272 | + | 106  | 95   | 1.11 | 101  | 88   | 1.15 |                        |
| <i>yvzC</i>  | 3,455,312 | 3,455,545 | - | 33   | 30   | 1.08 | 31   | 31   | 1.00 |                        |
| <i>yvaN</i>  | 3,455,697 | 3,456,104 | + | 255  | 269  | 0.95 | 304  | 368  | 0.82 |                        |
| <i>yvaO</i>  | 3,456,134 | 3,456,553 | + | 139  | 143  | 0.98 | 189  | 223  | 0.84 |                        |
| <i>yvaP</i>  | 3,456,396 | 3,457,106 | + | 181  | 167  | 1.08 | 187  | 211  | 0.89 |                        |
| <i>yvaQ</i>  | 3,457,097 | 3,458,797 | + | 719  | 849  | 0.85 | 415  | 374  | 1.11 |                        |
| <i>opuBD</i> | 3,458,837 | 3,459,517 | - | 155  | 201  | 0.77 | 325  | 499  | 0.65 |                        |
| <i>opuBC</i> | 3,459,534 | 3,460,454 | - | 167  | 222  | 0.75 | 697  | 1101 | 0.63 |                        |
| <i>opuBB</i> | 3,460,466 | 3,461,119 | - | 118  | 150  | 0.79 | 509  | 785  | 0.65 |                        |
| <i>opuBA</i> | 3,461,136 | 3,462,281 | - | 148  | 148  | 1.00 | 581  | 968  | 0.60 |                        |
| <i>yvaV</i>  | 3,462,556 | 3,463,098 | + | 238  | 179  | 1.33 | 273  | 318  | 0.86 |                        |
| <i>yvaW</i>  | 3,463,320 | 3,463,796 | + | 497  | 550  | 0.90 | 1158 | 1926 | 0.60 | Spo0A and AbrB regulon |
| <i>yvaX</i>  | 3,463,793 | 3,464,764 | + | 457  | 441  | 1.04 | 1193 | 1899 | 0.63 |                        |
| <i>yvaY</i>  | 3,464,807 | 3,465,418 | + | 4063 | 4814 | 0.84 | 5165 | 5062 | 1.02 |                        |
| <i>yvaZ</i>  | 3,465,465 | 3,466,088 | - | 611  | 1580 | 0.39 | 368  | 586  | 0.63 |                        |
| <i>yvbA</i>  | 3,466,085 | 3,466,357 | - | 689  | 1886 | 0.37 | 253  | 514  | 0.49 |                        |
| <i>opuCD</i> | 3,466,577 | 3,467,266 | - | 1504 | 1748 | 0.86 | 2145 | 2504 | 0.86 |                        |
| <i>opuCC</i> | 3,467,284 | 3,468,195 | - | 1914 | 1961 | 0.98 | 2869 | 3431 | 0.84 |                        |
| <i>opuCB</i> | 3,468,215 | 3,468,868 | - | 1205 | 1120 | 1.08 | 1934 | 2410 | 0.80 |                        |
| <i>opuCA</i> | 3,468,891 | 3,470,033 | - | 1508 | 1166 | 1.29 | 2363 | 3127 | 0.76 |                        |
| <i>yvbF</i>  | 3,470,297 | 3,470,854 | + | 335  | 283  | 1.18 | 545  | 723  | 0.75 |                        |
| <i>yvbG</i>  | 3,470,872 | 3,471,507 | - | 296  | 261  | 1.14 | 118  | 83   | 1.43 |                        |
| <i>yvbH</i>  | 3,471,657 | 3,472,271 | + | 295  | 309  | 0.95 | 592  | 721  | 0.82 |                        |
| <i>yvbI</i>  | 3,472,403 | 3,473,101 | + | 133  | 161  | 0.83 | 264  | 429  | 0.62 |                        |
| <i>yvbJ</i>  | 3,473,137 | 3,474,954 | - | 606  | 679  | 0.89 | 1205 | 1456 | 0.83 |                        |
| <i>yvbK</i>  | 3,475,074 | 3,475,541 | + | 356  | 331  | 1.08 | 468  | 479  | 0.98 |                        |
| <i>eno</i>   | 3,475,586 | 3,476,878 | - | 4366 | 4807 | 0.91 | 4171 | 3903 | 1.07 |                        |
| <i>pgm</i>   | 3,476,908 | 3,478,443 | - | 5803 | 6150 | 0.94 | 5248 | 4820 | 1.09 |                        |
| <i>tpiA</i>  | 3,478,436 | 3,479,197 | - | 4684 | 4813 | 0.97 | 3758 | 3423 | 1.10 |                        |
| <i>pgk</i>   | 3,479,228 | 3,480,412 | - | 5610 | 5896 | 0.95 | 4899 | 4497 | 1.09 |                        |
| <i>gapA</i>  | 3,480,729 | 3,481,736 | - | 7884 | 8203 | 0.96 | 6173 | 5695 | 1.08 |                        |
| <i>cggR</i>  | 3,481,783 | 3,482,805 | - | 2392 | 2496 | 0.96 | 2140 | 2225 | 0.96 |                        |
| <i>araE</i>  | 3,483,103 | 3,484,497 | - | 68   | 67   | 1.02 | 49   | 56   | 0.88 |                        |
| <i>araR</i>  | 3,484,635 | 3,485,789 | + | 298  | 248  | 1.20 | 334  | 351  | 0.95 |                        |
| <i>yvbT</i>  | 3,485,838 | 3,486,848 | - | 177  | 171  | 1.03 | 211  | 239  | 0.88 |                        |
| <i>yvbU</i>  | 3,487,005 | 3,487,883 | - | 60   | 62   | 0.97 | 64   | 70   | 0.91 |                        |
| <i>yvbV</i>  | 3,487,983 | 3,488,900 | + | 105  | 109  | 0.97 | 77   | 93   | 0.83 |                        |
| <i>yvbW</i>  | 3,488,941 | 3,490,284 | - | 162  | 182  | 0.89 | 193  | 250  | 0.77 |                        |
| <i>yvbX</i>  | 3,490,686 | 3,491,720 | - | 1354 | 1655 | 0.82 | 1309 | 1484 | 0.88 |                        |
| <i>yvbY</i>  | 3,491,828 | 3,492,550 | - | 5825 | 5409 | 1.08 | 5045 | 4745 | 1.06 |                        |
| <i>yvfW</i>  | 3,492,550 | 3,493,989 | - | 4590 | 4366 | 1.05 | 4822 | 4494 | 1.07 |                        |
| <i>yvfV</i>  | 3,494,016 | 3,494,732 | - | 3709 | 3489 | 1.06 | 4255 | 4168 | 1.02 |                        |
| <i>yvfU</i>  | 3,494,907 | 3,495,509 | - | 181  | 157  | 1.15 | 174  | 214  | 0.81 |                        |
| <i>yvfT</i>  | 3,495,526 | 3,496,512 | - | 196  | 172  | 1.14 | 189  | 211  | 0.89 |                        |
| <i>yvfS</i>  | 3,496,645 | 3,497,382 | - | 72   | 71   | 1.01 | 69   | 85   | 0.81 |                        |
| <i>yvfR</i>  | 3,497,383 | 3,498,288 | - | 77   | 76   | 1.02 | 67   | 72   | 0.93 |                        |
| <i>rsbQ</i>  | 3,498,572 | 3,499,381 | + | 308  | 264  | 1.17 | 276  | 324  | 0.85 |                        |
| <i>rsbP</i>  | 3,499,417 | 3,500,628 | + | 378  | 300  | 1.26 | 394  | 421  | 0.94 |                        |

|             |           |           |   |      |      |      |      |      |      |              |
|-------------|-----------|-----------|---|------|------|------|------|------|------|--------------|
| <i>yvfO</i> | 3,500,682 | 3,501,971 | - | 91   | 91   | 1.00 | 70   | 93   | 0.75 |              |
| <i>lacA</i> | 3,502,051 | 3,504,114 | - | 108  | 120  | 0.90 | 108  | 133  | 0.82 |              |
| <i>yvfM</i> | 3,504,133 | 3,504,984 | - | 84   | 94   | 0.90 | 80   | 109  | 0.73 |              |
| <i>yvfL</i> | 3,504,988 | 3,506,244 | - | 62   | 71   | 0.87 | 68   | 83   | 0.82 |              |
| <i>yvfK</i> | 3,506,284 | 3,507,549 | - | 114  | 120  | 0.95 | 107  | 143  | 0.75 |              |
| <i>lacR</i> | 3,507,690 | 3,508,682 | - | 130  | 127  | 1.03 | 157  | 166  | 0.95 |              |
| <i>yvfI</i> | 3,508,862 | 3,509,389 | - | 423  | 408  | 1.04 | 312  | 373  | 0.84 |              |
| <i>yvfH</i> | 3,509,811 | 3,511,502 | + | 820  | 1083 | 0.76 | 841  | 1077 | 0.78 |              |
| <i>sigL</i> | 3,511,529 | 3,512,839 | - | 1023 | 1077 | 0.95 | 836  | 815  | 1.03 |              |
| <i>yvfG</i> | 3,512,918 | 3,513,136 | + | 457  | 379  | 1.21 | 518  | 485  | 1.07 |              |
| <i>yvfF</i> | 3,513,146 | 3,514,114 | - | 380  | 133  | 2.87 | 337  | 150  | 2.25 | AbrB regulon |
| <i>yvfE</i> | 3,514,093 | 3,515,259 | - | 507  | 150  | 3.38 | 478  | 183  | 2.62 | AbrB regulon |
| <i>yvfD</i> | 3,515,264 | 3,515,914 | - | 384  | 154  | 2.49 | 335  | 163  | 2.05 | AbrB regulon |
| <i>yvfC</i> | 3,515,911 | 3,516,519 | - | 387  | 135  | 2.86 | 363  | 173  | 2.10 | AbrB regulon |
| <i>yvfB</i> | 3,516,516 | 3,517,553 | - | 333  | 119  | 2.80 | 330  | 135  | 2.44 | AbrB regulon |
| <i>yvfA</i> | 3,517,703 | 3,518,032 | - | 289  | 87   | 3.31 | 300  | 118  | 2.55 | AbrB regulon |
| <i>yveT</i> | 3,518,029 | 3,519,063 | - | 476  | 186  | 2.55 | 524  | 217  | 2.41 | AbrB regulon |
| <i>yveS</i> | 3,519,060 | 3,520,136 | - | 334  | 139  | 2.40 | 359  | 157  | 2.28 | AbrB regulon |
| <i>yveR</i> | 3,520,141 | 3,521,175 | - | 351  | 190  | 1.85 | 494  | 227  | 2.17 | AbrB regulon |
| <i>yveQ</i> | 3,521,200 | 3,522,303 | - | 252  | 87   | 2.90 | 314  | 125  | 2.51 | AbrB regulon |
| <i>yveP</i> | 3,522,300 | 3,523,454 | - | 228  | 102  | 2.25 | 258  | 126  | 2.05 | AbrB regulon |
| <i>yveO</i> | 3,523,447 | 3,524,283 | - | 294  | 111  | 2.66 | 321  | 159  | 2.01 | AbrB regulon |
| <i>yveN</i> | 3,524,280 | 3,525,425 | - | 435  | 177  | 2.45 | 455  | 219  | 2.07 | AbrB regulon |
| <i>yveM</i> | 3,525,437 | 3,527,233 | - | 384  | 192  | 2.00 | 317  | 184  | 1.73 | AbrB regulon |
| <i>yveL</i> | 3,527,492 | 3,528,175 | - | 317  | 119  | 2.67 | 287  | 134  | 2.15 | AbrB regulon |
| <i>yveK</i> | 3,528,181 | 3,528,885 | - | 423  | 126  | 3.36 | 376  | 171  | 2.20 | AbrB regulon |
| <i>slr</i>  | 3,529,131 | 3,529,589 | + | 141  | 80   | 1.76 | 150  | 88   | 1.71 |              |
| <i>pnbA</i> | 3,529,665 | 3,531,134 | + | 558  | 390  | 1.43 | 944  | 804  | 1.17 | AbrB regulon |
| <i>padC</i> | 3,531,355 | 3,531,840 | - | 98   | 96   | 1.02 | 125  | 135  | 0.92 |              |
| <i>yveG</i> | 3,531,863 | 3,532,150 | - | 86   | 86   | 1.00 | 100  | 94   | 1.07 |              |
| <i>racX</i> | 3,532,449 | 3,533,132 | - | 3310 | 2327 | 1.42 | 3172 | 2276 | 1.39 |              |
| <i>pbbE</i> | 3,533,148 | 3,534,503 | - | 3043 | 2064 | 1.47 | 2913 | 2091 | 1.39 |              |
| <i>sacB</i> | 3,535,042 | 3,536,463 | + | 44   | 52   | 0.85 | 44   | 49   | 0.90 |              |
| <i>yveB</i> | 3,536,537 | 3,538,087 | + | 78   | 78   | 1.01 | 57   | 65   | 0.88 |              |
| <i>yveA</i> | 3,538,195 | 3,539,757 | + | 46   | 45   | 1.03 | 37   | 39   | 0.94 |              |
| <i>yvdT</i> | 3,539,852 | 3,540,436 | + | 582  | 544  | 1.07 | 351  | 361  | 0.97 |              |
| <i>yvdS</i> | 3,540,518 | 3,540,853 | + | 120  | 106  | 1.14 | 67   | 75   | 0.89 |              |
| <i>yvdR</i> | 3,540,853 | 3,541,173 | + | 129  | 109  | 1.19 | 90   | 94   | 0.96 |              |
| <i>yvdQ</i> | 3,541,209 | 3,541,721 | - | 106  | 96   | 1.10 | 79   | 109  | 0.72 |              |
| <i>yvdP</i> | 3,541,973 | 3,543,316 | - | 95   | 71   | 1.35 | 75   | 72   | 1.04 |              |
| <i>yvdO</i> | 3,543,672 | 3,544,634 | + | 55   | 55   | 1.01 | 53   | 56   | 0.94 |              |
| <i>clpP</i> | 3,545,264 | 3,545,857 | + | 3455 | 3240 | 1.07 | 2755 | 2472 | 1.11 |              |
| <i>pgcM</i> | 3,545,903 | 3,546,583 | - | 147  | 121  | 1.21 | 119  | 118  | 1.01 |              |
| <i>malL</i> | 3,546,580 | 3,548,265 | - | 154  | 137  | 1.12 | 150  | 142  | 1.05 |              |
| <i>yvdK</i> | 3,548,258 | 3,550,531 | - | 138  | 131  | 1.05 | 128  | 139  | 0.92 |              |
| <i>yvdJ</i> | 3,550,509 | 3,551,393 | - | 67   | 70   | 0.96 | 70   | 73   | 0.96 |              |
| <i>yvdI</i> | 3,551,399 | 3,552,235 | - | 68   | 78   | 0.88 | 65   | 73   | 0.89 |              |
| <i>yvdH</i> | 3,552,236 | 3,553,543 | - | 73   | 85   | 0.85 | 67   | 81   | 0.82 |              |
| <i>yvdG</i> | 3,553,583 | 3,554,836 | - | 99   | 104  | 0.95 | 101  | 112  | 0.91 |              |
| <i>yvdF</i> | 3,554,932 | 3,556,701 | - | 78   | 81   | 0.97 | 67   | 73   | 0.93 |              |
| <i>yvdE</i> | 3,556,814 | 3,557,764 | - | 67   | 71   | 0.95 | 64   | 60   | 1.07 |              |
| <i>yvdD</i> | 3,557,970 | 3,558,545 | - | 1413 | 1299 | 1.09 | 2043 | 2023 | 1.01 |              |
| <i>yvdC</i> | 3,558,662 | 3,558,982 | + | 638  | 601  | 1.06 | 893  | 1071 | 0.83 |              |
| <i>yvdB</i> | 3,559,009 | 3,560,601 | - | 128  | 133  | 0.96 | 116  | 123  | 0.94 |              |
| <i>yvdA</i> | 3,560,620 | 3,561,213 | - | 126  | 134  | 0.94 | 95   | 103  | 0.92 |              |
| <i>yvcT</i> | 3,561,596 | 3,562,573 | + | 1208 | 1075 | 1.12 | 2072 | 1773 | 1.17 |              |
| <i>yvcS</i> | 3,562,611 | 3,564,551 | - | 209  | 208  | 1.00 | 273  | 290  | 0.94 |              |
| <i>yvcR</i> | 3,564,526 | 3,565,305 | - | 424  | 401  | 1.06 | 595  | 656  | 0.91 |              |
| <i>yvcQ</i> | 3,565,388 | 3,566,458 | - | 268  | 264  | 1.01 | 381  | 429  | 0.89 |              |
| <i>yvcP</i> | 3,566,452 | 3,567,165 | - | 253  | 264  | 0.96 | 319  | 373  | 0.85 |              |
| <i>yvcN</i> | 3,567,557 | 3,568,321 | - | 1100 | 960  | 1.15 | 1074 | 1025 | 1.05 |              |
| <i>crh</i>  | 3,568,322 | 3,568,579 | - | 1340 | 1154 | 1.16 | 1348 | 1437 | 0.94 |              |
| <i>yvcL</i> | 3,568,603 | 3,569,553 | - | 1155 | 1003 | 1.15 | 1250 | 1246 | 1.00 |              |
| <i>yvcK</i> | 3,569,576 | 3,570,529 | - | 1144 | 924  | 1.24 | 1150 | 1074 | 1.07 |              |
| <i>yvcJ</i> | 3,570,531 | 3,571,418 | - | 1206 | 968  | 1.25 | 1016 | 990  | 1.03 |              |
| <i>yvcI</i> | 3,571,443 | 3,571,919 | - | 946  | 765  | 1.24 | 1016 | 1001 | 1.02 |              |
| <i>trxB</i> | 3,572,237 | 3,573,187 | - | 812  | 687  | 1.18 | 1380 | 1361 | 1.01 |              |
| <i>yvcE</i> | 3,573,393 | 3,574,814 | - | 1371 | 876  | 1.56 | 3183 | 3586 | 0.89 |              |
| <i>yvcD</i> | 3,575,195 | 3,576,649 | - | 298  | 240  | 1.24 | 545  | 488  | 1.12 |              |
| <i>yvcC</i> | 3,576,775 | 3,578,544 | - | 407  | 340  | 1.20 | 489  | 430  | 1.14 |              |
| <i>yvcA</i> | 3,578,709 | 3,579,068 | - | 352  | 209  | 1.68 | 621  | 484  | 1.28 |              |
| <i>yvcB</i> | 3,579,083 | 3,580,993 | - | 635  | 408  | 1.56 | 624  | 489  | 1.28 |              |
| <i>yveA</i> | 3,580,995 | 3,581,720 | - | 338  | 371  | 0.91 | 310  | 256  | 1.21 |              |
| <i>hisI</i> | 3,581,966 | 3,582,595 | - | 2514 | 2926 | 0.86 | 1809 | 1903 | 0.95 |              |
| <i>hisF</i> | 3,582,592 | 3,583,350 | - | 2885 | 3108 | 0.93 | 1657 | 1824 | 0.91 |              |
| <i>hisA</i> | 3,583,347 | 3,584,084 | - | 2636 | 2833 | 0.93 | 1695 | 1784 | 0.95 |              |
| <i>hisH</i> | 3,584,081 | 3,584,719 | - | 3363 | 3674 | 0.92 | 2246 | 2436 | 0.92 |              |
| <i>hisB</i> | 3,584,720 | 3,585,304 | - | 2903 | 3264 | 0.89 | 2247 | 2300 | 0.98 |              |
| <i>hisD</i> | 3,585,301 | 3,586,584 | - | 1942 | 1872 | 1.04 | 1212 | 1266 | 0.96 |              |
| <i>hisG</i> | 3,586,581 | 3,587,222 | - | 1870 | 1742 | 1.07 | 1416 | 1401 | 1.01 |              |
| <i>hisZ</i> | 3,587,215 | 3,588,390 | - | 1196 | 889  | 1.34 | 965  | 1014 | 0.95 |              |
| <i>yvpB</i> | 3,588,641 | 3,589,393 | + | 233  | 266  | 0.87 | 166  | 219  | 0.76 |              |
| <i>yvpA</i> | 3,589,633 | 3,590,298 | + | 162  | 184  | 0.88 | 159  | 195  | 0.82 |              |
| <i>yvoF</i> | 3,590,318 | 3,590,836 | - | 679  | 585  | 1.16 | 811  | 875  | 0.93 |              |
| <i>hprP</i> | 3,590,840 | 3,591,490 | - | 1018 | 820  | 1.24 | 1172 | 1159 | 1.01 |              |
| <i>yvoD</i> | 3,591,487 | 3,592,425 | - | 1003 | 822  | 1.22 | 1155 | 1139 | 1.01 |              |
| <i>lgt</i>  | 3,592,449 | 3,593,258 | - | 654  | 547  | 1.19 | 739  | 742  | 1.00 |              |
| <i>hprK</i> | 3,593,272 | 3,594,204 | - | 721  | 668  | 1.08 | 750  | 842  | 0.89 |              |
| <i>nagA</i> | 3,594,386 | 3,595,576 | + | 463  | 466  | 0.99 | 392  | 388  | 1.01 |              |
| <i>nagB</i> | 3,595,573 | 3,596,301 | + | 763  | 679  | 1.12 | 552  | 515  | 1.07 |              |
| <i>yvoA</i> | 3,596,319 | 3,597,050 | + | 590  | 540  | 1.09 | 402  | 375  | 1.07 |              |

|              |           |           |   |       |       |      |      |      |      |               |
|--------------|-----------|-----------|---|-------|-------|------|------|------|------|---------------|
| <i>yvnB</i>  | 3,597,070 | 3,600,939 | - | 137   | 126   | 1.09 | 141  | 146  | 0.96 |               |
| <i>yvnA</i>  | 3,601,104 | 3,601,577 | + | 294   | 252   | 1.17 | 261  | 312  | 0.83 | AbrB regulon  |
| <i>cypX</i>  | 3,601,618 | 3,602,835 | - | 255   | 228   | 1.12 | 243  | 244  | 1.00 | AbrB regulon  |
| <i>yvmC</i>  | 3,602,851 | 3,603,597 | - | 361   | 318   | 1.14 | 408  | 386  | 1.06 | AbrB regulon  |
| <i>yvmB</i>  | 3,604,023 | 3,604,532 | + | 111   | 104   | 1.07 | 137  | 133  | 1.03 |               |
| <i>yvmA</i>  | 3,604,553 | 3,605,764 | + | 120   | 115   | 1.05 | 136  | 124  | 1.10 |               |
| <i>yvID</i>  | 3,605,792 | 3,606,151 | - | 1181  | 877   | 1.35 | 1276 | 1089 | 1.17 |               |
| <i>yvIC</i>  | 3,606,153 | 3,606,350 | - | 3280  | 2582  | 1.27 | 2947 | 2544 | 1.16 |               |
| <i>yvIB</i>  | 3,606,355 | 3,607,452 | - | 1879  | 1582  | 1.19 | 2540 | 2394 | 1.06 |               |
| <i>yvIA</i>  | 3,607,477 | 3,607,803 | - | 682   | 558   | 1.22 | 1272 | 1299 | 0.98 |               |
| <i>yvKN</i>  | 3,608,021 | 3,608,251 | + | 67    | 74    | 0.90 | 87   | 80   | 1.09 |               |
| <i>yvzB</i>  | 3,608,450 | 3,608,932 | - | 2074  | 2169  | 0.96 | 1406 | 1355 | 1.04 |               |
| <i>uvrA</i>  | 3,609,094 | 3,611,967 | - | 1762  | 1452  | 1.21 | 1488 | 1096 | 1.36 |               |
| <i>uvrB</i>  | 3,611,975 | 3,613,960 | - | 1253  | 1066  | 1.18 | 902  | 702  | 1.28 |               |
| <i>csbA</i>  | 3,614,146 | 3,614,376 | - | 319   | 297   | 1.07 | 332  | 293  | 1.13 |               |
| <i>yvkC</i>  | 3,614,823 | 3,617,318 | + | 118   | 104   | 1.13 | 196  | 162  | 1.21 |               |
| <i>yvkB</i>  | 3,617,394 | 3,617,963 | + | 134   | 131   | 1.02 | 250  | 205  | 1.22 |               |
| <i>yvkA</i>  | 3,617,994 | 3,619,328 | + | 95    | 90    | 1.06 | 136  | 116  | 1.17 |               |
| <i>yvjD</i>  | 3,619,376 | 3,620,569 | - | 835   | 845   | 0.99 | 598  | 663  | 0.90 |               |
| <i>yvzD</i>  | 3,620,648 | 3,620,986 | - | 854   | 1203  | 0.71 | 782  | 906  | 0.86 |               |
| <i>yvjB</i>  | 3,621,386 | 3,622,828 | - | 73    | 82    | 0.89 | 72   | 91   | 0.79 |               |
| <i>ftsX</i>  | 3,622,968 | 3,623,858 | - | 310   | 260   | 1.19 | 574  | 598  | 0.96 |               |
| <i>ftsE</i>  | 3,623,851 | 3,624,537 | - | 1142  | 898   | 1.27 | 1345 | 1449 | 0.93 | Spo0A regulon |
| <i>cccB</i>  | 3,624,771 | 3,625,109 | - | 1022  | 818   | 1.25 | 1059 | 995  | 1.06 |               |
| <i>yvjA</i>  | 3,625,158 | 3,626,003 | - | 212   | 172   | 1.24 | 165  | 140  | 1.17 |               |
| <i>prfB</i>  | 3,626,169 | 3,627,270 | - | 1633  | 1528  | 1.07 | 1846 | 1829 | 1.01 |               |
| <i>secA</i>  | 3,627,340 | 3,629,865 | - | 2457  | 2322  | 1.06 | 2062 | 2109 | 0.98 |               |
| <i>yvyD</i>  | 3,630,033 | 3,630,602 | - | 6016  | 6920  | 0.87 | 4101 | 3652 | 1.12 | Spo0A regulon |
| <i>fliT</i>  | 3,631,180 | 3,631,521 | - | 4707  | 4528  | 1.04 | 3693 | 3677 | 1.00 |               |
| <i>flIS</i>  | 3,631,518 | 3,631,919 | - | 4480  | 4379  | 1.02 | 3613 | 3338 | 1.08 |               |
| <i>flID</i>  | 3,631,941 | 3,633,437 | - | 4301  | 4412  | 0.97 | 3289 | 3239 | 1.02 |               |
| <i>yvyC</i>  | 3,633,455 | 3,633,784 | - | 1471  | 1655  | 0.89 | 1101 | 1191 | 0.92 | SigD regulon  |
| <i>hag</i>   | 3,634,017 | 3,634,931 | - | 10338 | 11309 | 0.91 | 8218 | 7537 | 1.09 | SigD regulon  |
| <i>csrA</i>  | 3,635,076 | 3,635,300 | - | 755   | 784   | 0.96 | 744  | 890  | 0.84 |               |
| <i>yviF</i>  | 3,635,294 | 3,635,725 | - | 461   | 467   | 0.99 | 319  | 424  | 0.75 |               |
| <i>yviE</i>  | 3,635,746 | 3,636,321 | - | 1154  | 1187  | 0.97 | 781  | 1003 | 0.78 |               |
| <i>flgL</i>  | 3,636,368 | 3,637,264 | - | 3942  | 3957  | 1.00 | 2362 | 2749 | 0.86 |               |
| <i>flgK</i>  | 3,637,275 | 3,638,798 | - | 3480  | 3712  | 0.94 | 2024 | 2370 | 0.85 |               |
| <i>yvyG</i>  | 3,638,817 | 3,639,299 | - | 4460  | 5317  | 0.84 | 2501 | 3039 | 0.82 |               |
| <i>flgM</i>  | 3,639,315 | 3,639,581 | - | 4326  | 5469  | 0.79 | 2262 | 2784 | 0.81 |               |
| <i>yvyF</i>  | 3,639,662 | 3,640,081 | - | 1930  | 2997  | 0.64 | 1537 | 2178 | 0.71 | SigD regulon  |
| <i>comFC</i> | 3,640,155 | 3,640,844 | - | 681   | 887   | 0.77 | 723  | 1087 | 0.67 |               |
| <i>comFB</i> | 3,640,841 | 3,641,137 | - | 949   | 1212  | 0.78 | 927  | 1395 | 0.66 |               |
| <i>comFA</i> | 3,641,197 | 3,642,588 | - | 904   | 1146  | 0.79 | 988  | 1432 | 0.69 |               |
| <i>yviA</i>  | 3,642,694 | 3,643,539 | - | 370   | 354   | 1.05 | 487  | 588  | 0.83 |               |
| <i>degU</i>  | 3,643,637 | 3,644,326 | - | 1308  | 1268  | 1.03 | 1615 | 1704 | 0.95 |               |
| <i>degS</i>  | 3,644,409 | 3,645,566 | - | 793   | 688   | 1.15 | 880  | 987  | 0.89 |               |
| <i>yvyE</i>  | 3,645,783 | 3,646,436 | + | 469   | 431   | 1.09 | 599  | 716  | 0.84 | Spo0A regulon |
| <i>yvhJ</i>  | 3,646,436 | 3,647,611 | + | 504   | 434   | 1.16 | 895  | 1004 | 0.89 |               |
| <i>tagO</i>  | 3,647,684 | 3,648,760 | - | 852   | 750   | 1.14 | 627  | 793  | 0.79 |               |
| <i>tuaH</i>  | 3,648,905 | 3,650,098 | - | 82    | 69    | 1.19 | 102  | 90   | 1.13 |               |
| <i>tuaG</i>  | 3,650,127 | 3,650,885 | - | 113   | 103   | 1.10 | 127  | 126  | 1.01 |               |
| <i>tuaF</i>  | 3,650,909 | 3,651,589 | - | 120   | 107   | 1.12 | 150  | 134  | 1.13 |               |
| <i>tuaE</i>  | 3,651,618 | 3,653,084 | - | 83    | 80    | 1.04 | 99   | 89   | 1.11 |               |
| <i>tuaD</i>  | 3,653,169 | 3,654,554 | - | 128   | 107   | 1.20 | 136  | 133  | 1.02 |               |
| <i>tuaC</i>  | 3,654,616 | 3,655,785 | - | 116   | 107   | 1.08 | 97   | 98   | 0.99 |               |
| <i>tuaB</i>  | 3,655,782 | 3,657,233 | - | 71    | 69    | 1.02 | 69   | 75   | 0.92 |               |
| <i>tuaA</i>  | 3,657,383 | 3,657,922 | - | 54    | 56    | 0.96 | 45   | 53   | 0.86 |               |
| <i>lyrC</i>  | 3,658,149 | 3,659,639 | - | 2620  | 2431  | 1.08 | 1931 | 2243 | 0.86 |               |
| <i>lyrB</i>  | 3,659,678 | 3,661,795 | - | 2289  | 2127  | 1.08 | 1850 | 2420 | 0.76 |               |
| <i>lytA</i>  | 3,661,819 | 3,662,127 | - | 1981  | 2243  | 0.88 | 1864 | 2299 | 0.81 | SigD regulon  |
| <i>lytR</i>  | 3,662,311 | 3,663,231 | + | 2245  | 2207  | 1.02 | 1963 | 1902 | 1.03 |               |
| <i>yvyH</i>  | 3,663,271 | 3,664,413 | - | 334   | 316   | 1.06 | 316  | 323  | 0.98 |               |
| <i>gtaB</i>  | 3,664,659 | 3,665,537 | + | 4537  | 4633  | 0.98 | 2532 | 2219 | 1.14 |               |
| <i>ggaB</i>  | 3,666,239 | 3,668,941 | - | 91    | 96    | 0.95 | 434  | 446  | 0.97 |               |
| <i>ggaA</i>  | 3,669,065 | 3,670,405 | - | 40    | 37    | 1.09 | 111  | 149  | 0.75 |               |
| <i>tagH</i>  | 3,672,594 | 3,674,177 | - | 375   | 317   | 1.18 | 704  | 727  | 0.97 |               |
| <i>tagG</i>  | 3,674,197 | 3,675,024 | - | 390   | 367   | 1.06 | 636  | 655  | 0.97 |               |
| <i>tagF</i>  | 3,675,189 | 3,677,429 | - | 359   | 282   | 1.27 | 657  | 747  | 0.88 |               |
| <i>tagE</i>  | 3,677,429 | 3,679,450 | - | 485   | 418   | 1.16 | 669  | 780  | 0.86 |               |
| <i>tagD</i>  | 3,679,611 | 3,680,000 | - | 1037  | 1206  | 0.86 | 944  | 1321 | 0.71 |               |
| <i>tagA</i>  | 3,680,400 | 3,681,170 | + | 861   | 867   | 0.99 | 779  | 1039 | 0.75 |               |
| <i>tagB</i>  | 3,681,203 | 3,682,348 | + | 371   | 341   | 1.09 | 389  | 483  | 0.81 |               |
| <i>tagC</i>  | 3,682,468 | 3,683,796 | + | 257   | 106   | 2.42 | 394  | 175  | 2.25 |               |
| <i>lytD</i>  | 3,683,856 | 3,686,498 | - | 1722  | 1710  | 1.01 | 1452 | 1413 | 1.03 | SigD regulon  |
| <i>pmi</i>   | 3,686,627 | 3,687,577 | - | 699   | 708   | 0.99 | 675  | 752  | 0.90 |               |
| <i>gerBA</i> | 3,687,842 | 3,689,290 | + | 51    | 54    | 0.95 | 47   | 50   | 0.94 |               |
| <i>gerBB</i> | 3,689,296 | 3,690,402 | + | 45    | 48    | 0.94 | 50   | 54   | 0.92 |               |
| <i>gerBC</i> | 3,690,399 | 3,691,523 | + | 69    | 66    | 1.05 | 67   | 72   | 0.93 |               |
| <i>ywtG</i>  | 3,691,560 | 3,692,933 | - | 2729  | 1892  | 1.44 | 963  | 349  | 2.76 |               |
| <i>ywtF</i>  | 3,693,266 | 3,694,234 | + | 697   | 619   | 1.13 | 568  | 534  | 1.06 |               |
| <i>ywtE</i>  | 3,694,390 | 3,695,250 | + | 625   | 529   | 1.18 | 736  | 721  | 1.02 |               |
| <i>ywtD</i>  | 3,695,284 | 3,696,525 | - | 4121  | 3358  | 1.23 | 3690 | 2910 | 1.27 |               |
| <i>ywtC</i>  | 3,696,666 | 3,696,833 | - | 49    | 43    | 1.14 | 60   | 51   | 1.17 |               |
| <i>ywtB</i>  | 3,696,848 | 3,697,990 | - | 79    | 77    | 1.03 | 74   | 86   | 0.86 |               |
| <i>ywtA</i>  | 3,698,009 | 3,698,458 | - | 48    | 41    | 1.19 | 42   | 43   | 0.97 |               |
| <i>ywsC</i>  | 3,698,473 | 3,699,654 | - | 51    | 49    | 1.03 | 46   | 48   | 0.96 |               |
| <i>rbsR</i>  | 3,700,438 | 3,701,418 | + | 206   | 206   | 1.00 | 244  | 296  | 0.83 | AbrB regulon  |
| <i>rbsK</i>  | 3,701,420 | 3,702,301 | + | 190   | 219   | 0.87 | 256  | 329  | 0.78 | AbrB regulon  |
| <i>rbsD</i>  | 3,702,298 | 3,702,693 | + | 71    | 99    | 0.72 | 126  | 153  | 0.83 | AbrB regulon  |
| <i>rbsA</i>  | 3,702,709 | 3,704,190 | + | 120   | 161   | 0.75 | 163  | 221  | 0.74 | AbrB regulon  |

|               |           |           |   |      |      |      |      |      |      |                        |
|---------------|-----------|-----------|---|------|------|------|------|------|------|------------------------|
| <i>rbsC</i>   | 3,704,192 | 3,705,160 | + | 90   | 124  | 0.73 | 91   | 131  | 0.70 | AbrB regulon           |
| <i>rbsB</i>   | 3,705,172 | 3,706,089 | + | 216  | 279  | 0.77 | 208  | 290  | 0.72 | AbrB regulon           |
| <i>ywsA</i>   | 3,706,171 | 3,706,707 | + | 5563 | 5681 | 0.98 | 3027 | 1825 | 1.66 |                        |
| <i>ywsA</i>   | 3,706,863 | 3,707,159 | + | 159  | 261  | 0.61 | 68   | 51   | 1.35 |                        |
| <i>ywrO</i>   | 3,707,199 | 3,707,726 | - | 783  | 524  | 1.49 | 1284 | 1094 | 1.17 |                        |
| <i>alsD</i>   | 3,707,826 | 3,708,593 | - | 173  | 149  | 1.16 | 175  | 135  | 1.30 |                        |
| <i>alsS</i>   | 3,708,655 | 3,710,370 | - | 166  | 120  | 1.38 | 151  | 129  | 1.17 |                        |
| <i>alsR</i>   | 3,710,525 | 3,711,433 | + | 264  | 299  | 0.88 | 280  | 330  | 0.85 |                        |
| <i>ywrK</i>   | 3,711,644 | 3,712,972 | + | 30   | 36   | 0.83 | 36   | 40   | 0.90 |                        |
| <i>ywrJ</i>   | 3,713,029 | 3,713,706 | - | 32   | 40   | 0.78 | 38   | 39   | 0.97 |                        |
| <i>cotB</i>   | 3,713,766 | 3,714,908 | - | 45   | 46   | 0.97 | 55   | 48   | 1.13 |                        |
| <i>cotH</i>   | 3,715,036 | 3,716,124 | - | 35   | 41   | 0.87 | 37   | 40   | 0.92 |                        |
| <i>cotG</i>   | 3,716,265 | 3,716,852 | + | 38   | 115  | 0.33 | 36   | 47   | 0.76 |                        |
| <i>ywrF</i>   | 3,717,026 | 3,717,643 | + | 490  | 508  | 0.96 | 428  | 363  | 1.18 |                        |
| <i>ywrE</i>   | 3,717,821 | 3,718,156 | + | 308  | 262  | 1.17 | 452  | 478  | 0.95 |                        |
| <i>ywrD</i>   | 3,718,161 | 3,719,738 | - | 78   | 83   | 0.94 | 64   | 73   | 0.88 |                        |
| <i>ywrC</i>   | 3,719,952 | 3,720,428 | + | 232  | 266  | 0.87 | 154  | 181  | 0.85 |                        |
| <i>ywrB</i>   | 3,720,442 | 3,721,035 | + | 143  | 157  | 0.91 | 118  | 121  | 0.98 |                        |
| <i>ywrA</i>   | 3,721,032 | 3,721,568 | + | 108  | 111  | 0.98 | 100  | 114  | 0.88 |                        |
| <i>ywqO</i>   | 3,721,595 | 3,721,816 | - | 41   | 44   | 0.95 | 57   | 47   | 1.19 |                        |
| <i>ywqN</i>   | 3,721,813 | 3,722,358 | - | 68   | 58   | 1.18 | 84   | 79   | 1.07 |                        |
| <i>ywqM</i>   | 3,722,481 | 3,723,362 | + | 107  | 123  | 0.86 | 91   | 119  | 0.76 |                        |
| <i>ywqL</i>   | 3,723,447 | 3,724,163 | - | 504  | 330  | 1.53 | 548  | 491  | 1.12 |                        |
| <i>ywqK</i>   | 3,724,173 | 3,724,637 | - | 710  | 413  | 1.72 | 672  | 629  | 1.07 |                        |
| <i>ywqJ</i>   | 3,724,627 | 3,726,435 | - | 726  | 475  | 1.53 | 644  | 519  | 1.24 |                        |
| <i>ywqI</i>   | 3,726,454 | 3,726,714 | - | 1060 | 802  | 1.32 | 990  | 728  | 1.36 |                        |
| <i>ywqH</i>   | 3,726,724 | 3,727,146 | - | 859  | 647  | 1.33 | 711  | 569  | 1.25 |                        |
| <i>ywqG</i>   | 3,727,538 | 3,728,323 | - | 440  | 350  | 1.26 | 725  | 691  | 1.05 |                        |
| <i>ywqF</i>   | 3,728,515 | 3,729,837 | - | 196  | 154  | 1.27 | 324  | 293  | 1.11 |                        |
| <i>ywqE</i>   | 3,730,032 | 3,730,796 | - | 113  | 97   | 1.17 | 160  | 147  | 1.09 | AbrB regulon           |
| <i>ywqD</i>   | 3,730,849 | 3,731,562 | - | 336  | 270  | 1.24 | 497  | 526  | 0.94 | AbrB regulon           |
| <i>ywqC</i>   | 3,731,552 | 3,732,298 | - | 215  | 226  | 0.95 | 377  | 427  | 0.88 | Spo0A and AbrB regulon |
| <i>ywqB</i>   | 3,732,879 | 3,734,489 | + | 209  | 181  | 1.16 | 212  | 263  | 0.81 |                        |
| <i>ywqA</i>   | 3,734,476 | 3,737,244 | + | 383  | 282  | 1.36 | 484  | 460  | 1.05 |                        |
| <i>ywpJ</i>   | 3,737,370 | 3,738,227 | - | 252  | 278  | 0.91 | 505  | 663  | 0.76 |                        |
| <i>glcR</i>   | 3,738,233 | 3,739,009 | - | 215  | 248  | 0.87 | 361  | 519  | 0.69 |                        |
| <i>ywpH</i>   | 3,739,233 | 3,739,574 | - | 3282 | 3802 | 0.86 | 3532 | 4102 | 0.86 |                        |
| <i>ywpG</i>   | 3,739,651 | 3,740,034 | - | 49   | 57   | 0.86 | 129  | 127  | 1.02 |                        |
| <i>ywpF</i>   | 3,740,209 | 3,740,619 | + | 1842 | 1690 | 1.09 | 1285 | 1364 | 0.94 |                        |
| <i>ywpE</i>   | 3,740,758 | 3,741,066 | - | 38   | 36   | 1.05 | 54   | 51   | 1.07 |                        |
| <i>ywpD</i>   | 3,741,410 | 3,742,246 | + | 45   | 46   | 0.99 | 48   | 51   | 0.94 |                        |
| <i>mscL</i>   | 3,742,293 | 3,742,685 | - | 564  | 541  | 1.04 | 660  | 743  | 0.89 |                        |
| <i>ywpB</i>   | 3,742,784 | 3,743,182 | - | 224  | 243  | 0.92 | 291  | 349  | 0.83 |                        |
| <i>rapD</i>   | 3,743,374 | 3,744,438 | + | 384  | 303  | 1.27 | 510  | 490  | 1.04 |                        |
| <i>flhP</i>   | 3,744,461 | 3,745,267 | - | 1352 | 1878 | 0.72 | 1156 | 1548 | 0.75 |                        |
| <i>flhO</i>   | 3,745,301 | 3,746,113 | - | 1339 | 2311 | 0.58 | 1147 | 1487 | 0.77 |                        |
| <i>mbI</i>    | 3,746,276 | 3,747,277 | - | 982  | 921  | 1.07 | 1098 | 1595 | 0.69 |                        |
| <i>spoIIB</i> | 3,747,443 | 3,747,724 | - | 27   | 41   | 0.66 | 31   | 40   | 0.76 |                        |
| <i>ywoH</i>   | 3,748,074 | 3,748,487 | + | 60   | 59   | 1.02 | 63   | 100  | 0.64 |                        |
| <i>ywoG</i>   | 3,748,509 | 3,749,699 | + | 79   | 74   | 1.07 | 98   | 108  | 0.90 |                        |
| <i>ywoF</i>   | 3,749,790 | 3,751,196 | - | 614  | 507  | 1.21 | 756  | 798  | 0.95 |                        |
| <i>ywoE</i>   | 3,751,302 | 3,752,774 | - | 62   | 65   | 0.96 | 55   | 60   | 0.91 | AbrB regulon           |
| <i>ywoD</i>   | 3,752,955 | 3,754,313 | - | 169  | 149  | 1.13 | 184  | 170  | 1.09 |                        |
| <i>ywoC</i>   | 3,754,313 | 3,754,882 | - | 295  | 276  | 1.07 | 376  | 386  | 0.98 |                        |
| <i>ywoB</i>   | 3,755,066 | 3,755,530 | - | 234  | 235  | 1.00 | 325  | 341  | 0.95 |                        |
| <i>nrgA</i>   | 3,755,812 | 3,757,026 | + | 312  | 321  | 0.97 | 168  | 158  | 1.07 |                        |
| <i>nrgB</i>   | 3,757,038 | 3,757,388 | + | 852  | 861  | 0.99 | 1196 | 830  | 1.44 |                        |
| <i>ywoA</i>   | 3,757,569 | 3,758,150 | + | 451  | 320  | 1.41 | 495  | 451  | 1.10 |                        |
| <i>ywnJ</i>   | 3,758,191 | 3,758,613 | - | 81   | 66   | 1.22 | 96   | 74   | 1.31 |                        |
| <i>spoIIQ</i> | 3,758,724 | 3,759,575 | - | 72   | 105  | 0.69 | 70   | 82   | 0.85 |                        |
| <i>ywnH</i>   | 3,759,716 | 3,760,207 | + | 468  | 477  | 0.98 | 489  | 620  | 0.79 |                        |
| <i>ywnG</i>   | 3,760,204 | 3,760,722 | + | 370  | 341  | 1.08 | 430  | 477  | 0.90 |                        |
| <i>ywnF</i>   | 3,761,009 | 3,761,443 | - | 554  | 432  | 1.28 | 216  | 203  | 1.06 |                        |
| <i>ywnE</i>   | 3,761,686 | 3,763,134 | + | 212  | 175  | 1.21 | 255  | 250  | 1.02 |                        |
| <i>mta</i>    | 3,763,155 | 3,763,928 | - | 149  | 138  | 1.08 | 144  | 127  | 1.13 |                        |
| <i>ywnC</i>   | 3,764,073 | 3,764,456 | + | 88   | 81   | 1.09 | 140  | 142  | 0.99 |                        |
| <i>ywnB</i>   | 3,764,491 | 3,765,132 | - | 192  | 221  | 0.87 | 252  | 303  | 0.83 |                        |
| <i>ywnA</i>   | 3,765,200 | 3,765,601 | - | 324  | 332  | 0.97 | 376  | 435  | 0.86 |                        |
| <i>ureC</i>   | 3,765,736 | 3,767,445 | - | 570  | 480  | 1.19 | 492  | 386  | 1.27 |                        |
| <i>ureB</i>   | 3,767,442 | 3,767,816 | - | 694  | 563  | 1.23 | 660  | 510  | 1.29 |                        |
| <i>ureA</i>   | 3,767,813 | 3,768,130 | - | 603  | 538  | 1.12 | 506  | 376  | 1.35 |                        |
| <i>csbD</i>   | 3,769,127 | 3,769,315 | - | 752  | 802  | 0.94 | 1038 | 587  | 1.77 |                        |
| <i>ywmF</i>   | 3,769,388 | 3,769,867 | - | 121  | 85   | 1.42 | 71   | 46   | 1.56 |                        |
| <i>rapB</i>   | 3,770,023 | 3,771,156 | - | 675  | 644  | 1.05 | 621  | 610  | 1.02 |                        |
| <i>moaA</i>   | 3,771,348 | 3,772,373 | - | 903  | 673  | 1.34 | 1163 | 859  | 1.35 |                        |
| <i>fdhD</i>   | 3,772,389 | 3,773,177 | - | 671  | 439  | 1.53 | 704  | 540  | 1.30 |                        |
| <i>ywmD</i>   | 3,773,678 | 3,774,352 | - | 312  | 239  | 1.31 | 306  | 290  | 1.06 |                        |
| <i>ywmC</i>   | 3,774,676 | 3,775,359 | - | 197  | 173  | 1.14 | 140  | 153  | 0.91 |                        |
| <i>spoIIB</i> | 3,775,745 | 3,776,776 | - | 190  | 194  | 0.98 | 133  | 136  | 0.98 | Spo0A regulon          |
| <i>murAA</i>  | 3,776,972 | 3,778,282 | - | 2149 | 1780 | 1.21 | 1888 | 2052 | 0.92 |                        |
| <i>ywmB</i>   | 3,778,316 | 3,779,056 | - | 1689 | 1257 | 1.34 | 1319 | 1406 | 0.94 |                        |
| <i>ywzB</i>   | 3,779,185 | 3,779,415 | - | 1498 | 1131 | 1.32 | 1110 | 1050 | 1.06 |                        |
| <i>ywmA</i>   | 3,779,585 | 3,780,058 | + | 79   | 94   | 0.85 | 59   | 61   | 0.97 |                        |
| <i>atpC</i>   | 3,780,092 | 3,780,490 | - | 4800 | 4766 | 1.01 | 3214 | 3188 | 1.01 |                        |
| <i>atpD</i>   | 3,780,514 | 3,781,935 | - | 3249 | 3927 | 0.83 | 3226 | 3478 | 0.93 |                        |
| <i>atpG</i>   | 3,781,961 | 3,782,824 | - | 3432 | 4132 | 0.83 | 4093 | 4309 | 0.95 |                        |
| <i>atpA</i>   | 3,782,901 | 3,784,409 | - | 3018 | 3229 | 0.93 | 3345 | 3658 | 0.91 |                        |
| <i>atpH</i>   | 3,784,426 | 3,784,971 | - | 3179 | 3403 | 0.93 | 3691 | 3910 | 0.94 |                        |
| <i>atpF</i>   | 3,784,968 | 3,785,480 | - | 4081 | 4421 | 0.92 | 4377 | 4743 | 0.92 |                        |
| <i>atpE</i>   | 3,785,643 | 3,785,855 | - | 2255 | 2411 | 0.94 | 3065 | 3505 | 0.87 |                        |
| <i>atpB</i>   | 3,785,901 | 3,786,635 | - | 2634 | 2877 | 0.92 | 2819 | 3180 | 0.89 |                        |

|               |           |           |   |      |      |      |      |      |      |                        |
|---------------|-----------|-----------|---|------|------|------|------|------|------|------------------------|
| <i>atpI</i>   | 3,786,643 | 3,787,026 | - | 1416 | 1481 | 0.96 | 1251 | 1642 | 0.76 |                        |
| <i>upp</i>    | 3,787,449 | 3,788,078 | - | 719  | 752  | 0.96 | 1304 | 1520 | 0.86 |                        |
| <i>glyA</i>   | 3,788,213 | 3,789,460 | - | 2740 | 3010 | 0.91 | 2545 | 2891 | 0.88 |                        |
| <i>ywlG</i>   | 3,789,667 | 3,790,209 | - | 695  | 679  | 1.02 | 647  | 611  | 1.06 |                        |
| <i>ywlF</i>   | 3,790,222 | 3,790,671 | - | 1009 | 984  | 1.03 | 913  | 932  | 0.98 |                        |
| <i>ywlE</i>   | 3,790,828 | 3,791,280 | - | 493  | 491  | 1.00 | 372  | 392  | 0.95 |                        |
| <i>ywlD</i>   | 3,791,356 | 3,791,913 | - | 71   | 64   | 1.11 | 64   | 68   | 0.94 |                        |
| <i>ywlC</i>   | 3,791,992 | 3,793,032 | - | 314  | 306  | 1.02 | 316  | 295  | 1.07 |                        |
| <i>ywlB</i>   | 3,793,189 | 3,793,632 | - | 583  | 349  | 1.67 | 231  | 137  | 1.68 |                        |
| <i>spoIIR</i> | 3,793,699 | 3,794,373 | - | 591  | 353  | 1.68 | 249  | 130  | 1.91 |                        |
| <i>ywlA</i>   | 3,794,514 | 3,794,876 | + | 143  | 135  | 1.06 | 178  | 179  | 0.99 |                        |
| <i>ywkF</i>   | 3,794,893 | 3,795,180 | - | 214  | 169  | 1.27 | 256  | 251  | 1.02 |                        |
| <i>ywkE</i>   | 3,795,240 | 3,796,106 | - | 338  | 246  | 1.37 | 436  | 418  | 1.04 |                        |
| <i>prfA</i>   | 3,796,108 | 3,797,178 | - | 1284 | 1159 | 1.11 | 1436 | 1368 | 1.05 |                        |
| <i>ywkD</i>   | 3,797,304 | 3,797,690 | + | 224  | 190  | 1.18 | 263  | 198  | 1.33 |                        |
| <i>ywkC</i>   | 3,797,812 | 3,798,366 | + | 433  | 429  | 1.01 | 544  | 480  | 1.13 | Spo0A regulon          |
| <i>ywkB</i>   | 3,798,400 | 3,799,359 | - | 84   | 66   | 1.27 | 56   | 44   | 1.26 |                        |
| <i>ywkA</i>   | 3,799,441 | 3,801,189 | - | 101  | 79   | 1.27 | 106  | 73   | 1.46 |                        |
| <i>tdk</i>    | 3,801,428 | 3,802,015 | - | 194  | 237  | 0.82 | 202  | 277  | 0.73 |                        |
| <i>rpmE</i>   | 3,802,104 | 3,802,304 | - | 1546 | 2104 | 0.74 | 3368 | 3812 | 0.88 |                        |
| <i>rho</i>    | 3,802,423 | 3,803,706 | - | 1628 | 1357 | 1.20 | 1655 | 1657 | 1.00 |                        |
| <i>ywjI</i>   | 3,804,113 | 3,805,078 | - | 1103 | 1371 | 0.80 | 1548 | 2290 | 0.68 |                        |
| <i>murAB</i>  | 3,805,109 | 3,806,398 | - | 1237 | 1425 | 0.87 | 1640 | 2361 | 0.69 |                        |
| <i>ywjH</i>   | 3,806,777 | 3,807,415 | - | 2923 | 3799 | 0.77 | 3299 | 4104 | 0.80 |                        |
| <i>fbxA</i>   | 3,807,535 | 3,808,392 | - | 3303 | 4012 | 0.82 | 3543 | 4124 | 0.86 |                        |
| <i>spo0F</i>  | 3,808,573 | 3,808,947 | - | 742  | 740  | 1.00 | 604  | 811  | 0.75 | Spo0A regulon          |
| <i>ywjG</i>   | 3,809,113 | 3,809,634 | + | 242  | 239  | 1.01 | 268  | 268  | 1.00 |                        |
| <i>pyrG</i>   | 3,809,716 | 3,811,323 | - | 493  | 499  | 0.99 | 918  | 997  | 0.92 |                        |
| <i>rpoE</i>   | 3,811,565 | 3,812,086 | - | 958  | 1014 | 0.94 | 1013 | 1331 | 0.76 |                        |
| <i>acdA</i>   | 3,812,269 | 3,813,408 | - | 148  | 129  | 1.15 | 153  | 148  | 1.04 |                        |
| <i>ywjF</i>   | 3,813,405 | 3,815,522 | - | 145  | 130  | 1.12 | 149  | 158  | 0.94 |                        |
| <i>ywjE</i>   | 3,815,677 | 3,816,873 | + | 57   | 60   | 0.94 | 43   | 53   | 0.81 |                        |
| <i>ywjD</i>   | 3,816,886 | 3,817,848 | + | 50   | 49   | 1.02 | 38   | 44   | 0.86 |                        |
| <i>ywjC</i>   | 3,817,929 | 3,818,201 | + | 1697 | 2317 | 0.73 | 2127 | 1166 | 1.82 |                        |
| <i>ywjB</i>   | 3,818,243 | 3,818,767 | - | 1583 | 1476 | 1.07 | 946  | 978  | 0.97 |                        |
| <i>ywjA</i>   | 3,818,777 | 3,820,504 | - | 1865 | 1804 | 1.03 | 946  | 998  | 0.95 |                        |
| <i>ywiE</i>   | 3,820,593 | 3,822,095 | - | 1348 | 1632 | 0.83 | 988  | 778  | 1.27 |                        |
| <i>narI</i>   | 3,822,581 | 3,823,252 | - | 59   | 62   | 0.96 | 56   | 63   | 0.89 |                        |
| <i>narJ</i>   | 3,823,249 | 3,823,803 | - | 112  | 114  | 0.99 | 91   | 107  | 0.85 |                        |
| <i>narH</i>   | 3,823,829 | 3,825,292 | - | 125  | 118  | 1.05 | 85   | 112  | 0.76 |                        |
| <i>narG</i>   | 3,825,282 | 3,828,968 | - | 97   | 94   | 1.03 | 71   | 88   | 0.81 |                        |
| <i>arfM</i>   | 3,829,164 | 3,829,640 | - | 82   | 85   | 0.96 | 67   | 85   | 0.79 |                        |
| <i>ywiC</i>   | 3,829,784 | 3,830,503 | + | 48   | 53   | 0.90 | 53   | 62   | 0.85 |                        |
| <i>fnr</i>    | 3,830,535 | 3,831,251 | - | 587  | 499  | 1.18 | 177  | 158  | 1.12 |                        |
| <i>narK</i>   | 3,831,350 | 3,832,537 | - | 92   | 93   | 0.99 | 75   | 89   | 0.85 |                        |
| <i>argS</i>   | 3,832,673 | 3,834,343 | - | 918  | 849  | 1.08 | 927  | 1082 | 0.86 |                        |
| <i>ywiB</i>   | 3,834,340 | 3,834,768 | - | 509  | 518  | 0.98 | 561  | 734  | 0.76 |                        |
| <i>albA</i>   | 3,835,346 | 3,836,692 | + | 3725 | 2918 | 1.28 | 2366 | 1962 | 1.21 | AbrB regulon           |
| <i>albB</i>   | 3,836,705 | 3,836,866 | + | 3153 | 2377 | 1.33 | 1724 | 1474 | 1.17 | AbrB regulon           |
| <i>albC</i>   | 3,836,863 | 3,837,582 | + | 2003 | 1173 | 1.71 | 1017 | 911  | 1.12 | AbrB regulon           |
| <i>albD</i>   | 3,837,575 | 3,838,885 | + | 1512 | 869  | 1.74 | 710  | 670  | 1.06 | AbrB regulon           |
| <i>albE</i>   | 3,838,875 | 3,840,035 | + | 1139 | 656  | 1.74 | 498  | 476  | 1.05 | AbrB regulon           |
| <i>albF</i>   | 3,840,040 | 3,841,320 | + | 900  | 587  | 1.53 | 372  | 372  | 1.00 | AbrB regulon           |
| <i>albG</i>   | 3,841,317 | 3,842,018 | + | 417  | 282  | 1.48 | 149  | 155  | 0.96 | AbrB regulon           |
| <i>ywhL</i>   | 3,842,024 | 3,843,400 | - | 60   | 60   | 1.00 | 58   | 62   | 0.95 |                        |
| <i>ywhK</i>   | 3,843,439 | 3,844,794 | - | 44   | 47   | 0.94 | 44   | 47   | 0.94 |                        |
| <i>rapF</i>   | 3,845,024 | 3,846,169 | + | 2507 | 2361 | 1.06 | 2765 | 2821 | 0.98 |                        |
| <i>ywhH</i>   | 3,846,371 | 3,846,844 | + | 272  | 200  | 1.36 | 396  | 360  | 1.10 |                        |
| <i>speB</i>   | 3,846,876 | 3,847,748 | - | 234  | 247  | 0.95 | 480  | 473  | 1.01 |                        |
| <i>speE</i>   | 3,847,809 | 3,848,639 | - | 406  | 531  | 0.77 | 614  | 762  | 0.81 |                        |
| <i>ywhE</i>   | 3,848,841 | 3,850,784 | + | 83   | 83   | 0.99 | 64   | 82   | 0.78 |                        |
| <i>ywhD</i>   | 3,851,208 | 3,851,726 | - | 776  | 663  | 1.17 | 1092 | 1081 | 1.01 |                        |
| <i>ywhC</i>   | 3,851,740 | 3,852,399 | - | 528  | 475  | 1.11 | 594  | 648  | 0.92 |                        |
| <i>ywhB</i>   | 3,852,508 | 3,852,696 | + | 287  | 297  | 0.97 | 431  | 438  | 0.98 |                        |
| <i>ywhA</i>   | 3,852,739 | 3,853,158 | - | 308  | 302  | 1.02 | 330  | 338  | 0.98 |                        |
| <i>thrZ</i>   | 3,853,278 | 3,855,194 | - | 142  | 141  | 1.01 | 150  | 155  | 0.97 |                        |
| <i>mmr</i>    | 3,856,039 | 3,857,439 | - | 172  | 168  | 1.03 | 183  | 206  | 0.89 |                        |
| <i>ywgB</i>   | 3,857,439 | 3,857,909 | - | 88   | 93   | 0.94 | 111  | 128  | 0.87 |                        |
| <i>ywgA</i>   | 3,858,021 | 3,858,521 | - | 306  | 269  | 1.14 | 476  | 538  | 0.88 |                        |
| <i>ywfO</i>   | 3,858,557 | 3,859,858 | - | 552  | 534  | 1.03 | 773  | 853  | 0.91 |                        |
| <i>ywzC</i>   | 3,860,020 | 3,860,244 | - | 281  | 335  | 0.84 | 171  | 239  | 0.72 |                        |
| <i>rsfA</i>   | 3,860,459 | 3,861,235 | + | 90   | 103  | 0.88 | 64   | 79   | 0.82 |                        |
| <i>ywfM</i>   | 3,861,379 | 3,862,269 | - | 96   | 85   | 1.13 | 91   | 87   | 1.05 |                        |
| <i>ywfL</i>   | 3,862,437 | 3,863,282 | - | 165  | 172  | 0.96 | 218  | 263  | 0.83 |                        |
| <i>ywfK</i>   | 3,863,331 | 3,864,230 | - | 159  | 167  | 0.95 | 169  | 182  | 0.93 |                        |
| <i>pta</i>    | 3,864,377 | 3,865,348 | - | 1083 | 959  | 1.13 | 1581 | 1399 | 1.13 |                        |
| <i>ywfI</i>   | 3,865,618 | 3,866,382 | + | 1014 | 797  | 1.27 | 698  | 643  | 1.09 |                        |
| <i>ywfH</i>   | 3,866,515 | 3,867,294 | + | 1029 | 933  | 1.10 | 947  | 1041 | 0.91 |                        |
| <i>ywfG</i>   | 3,867,309 | 3,868,508 | - | 268  | 266  | 1.01 | 382  | 409  | 0.94 |                        |
| <i>ywfF</i>   | 3,868,509 | 3,869,693 | - | 407  | 382  | 1.06 | 676  | 692  | 0.98 |                        |
| <i>ywfE</i>   | 3,869,690 | 3,871,108 | - | 594  | 548  | 1.08 | 931  | 953  | 0.98 |                        |
| <i>ywfD</i>   | 3,871,127 | 3,871,894 | - | 549  | 489  | 1.12 | 743  | 794  | 0.93 |                        |
| <i>ywfC</i>   | 3,871,891 | 3,872,598 | - | 429  | 432  | 0.99 | 630  | 708  | 0.89 |                        |
| <i>ywfB</i>   | 3,872,588 | 3,873,202 | - | 251  | 268  | 0.94 | 240  | 291  | 0.82 |                        |
| <i>ywfA</i>   | 3,873,354 | 3,874,592 | - | 126  | 114  | 1.10 | 92   | 99   | 0.93 |                        |
| <i>rocC</i>   | 3,874,802 | 3,876,214 | - | 236  | 234  | 1.01 | 203  | 195  | 1.05 |                        |
| <i>rocB</i>   | 3,876,214 | 3,877,914 | - | 213  | 330  | 0.65 | 180  | 190  | 0.95 |                        |
| <i>rocA</i>   | 3,877,988 | 3,879,535 | - | 448  | 939  | 0.48 | 305  | 434  | 0.70 | AbrB regulon           |
| <i>rocG</i>   | 3,879,762 | 3,881,036 | - | 310  | 418  | 0.74 | 281  | 351  | 0.80 | Spo0A and AbrB regulon |
| <i>yweA</i>   | 3,881,213 | 3,881,677 | - | 2653 | 3230 | 0.82 | 2078 | 2278 | 0.91 | AbrB regulon           |
| <i>spsL</i>   | 3,882,001 | 3,882,456 | - | 96   | 78   | 1.23 | 121  | 112  | 1.08 |                        |

|             |           |           |   |      |      |      |      |      |      |                        |
|-------------|-----------|-----------|---|------|------|------|------|------|------|------------------------|
| <i>spsK</i> | 3,882,449 | 3,883,300 | - | 174  | 142  | 1.22 | 186  | 175  | 1.06 |                        |
| <i>spsJ</i> | 3,883,314 | 3,884,261 | - | 113  | 99   | 1.14 | 141  | 123  | 1.14 |                        |
| <i>spsI</i> | 3,884,261 | 3,885,001 | - | 120  | 114  | 1.05 | 121  | 126  | 0.96 |                        |
| <i>spsG</i> | 3,885,026 | 3,886,045 | - | 102  | 98   | 1.04 | 99   | 101  | 0.98 |                        |
| <i>spsF</i> | 3,886,052 | 3,886,771 | - | 72   | 69   | 1.03 | 72   | 69   | 1.04 |                        |
| <i>spsE</i> | 3,886,764 | 3,887,885 | - | 109  | 109  | 1.00 | 97   | 96   | 1.01 |                        |
| <i>spsD</i> | 3,887,885 | 3,888,754 | - | 67   | 63   | 1.07 | 66   | 70   | 0.94 |                        |
| <i>spsC</i> | 3,888,755 | 3,889,924 | - | 105  | 108  | 0.97 | 87   | 109  | 0.80 |                        |
| <i>spsB</i> | 3,889,945 | 3,891,363 | - | 44   | 48   | 0.94 | 40   | 43   | 0.94 |                        |
| <i>spsA</i> | 3,891,368 | 3,892,138 | - | 46   | 55   | 0.84 | 36   | 44   | 0.82 |                        |
| <i>ywdL</i> | 3,892,458 | 3,893,003 | + | 53   | 62   | 0.86 | 37   | 44   | 0.84 |                        |
| <i>ywdK</i> | 3,893,076 | 3,893,417 | - | 710  | 590  | 1.20 | 568  | 520  | 1.09 |                        |
| <i>ywdJ</i> | 3,893,418 | 3,894,800 | - | 414  | 371  | 1.12 | 680  | 698  | 0.97 |                        |
| <i>ywdI</i> | 3,894,820 | 3,895,137 | - | 629  | 551  | 1.14 | 566  | 608  | 0.93 |                        |
| <i>ywdH</i> | 3,895,305 | 3,896,678 | + | 137  | 137  | 1.00 | 160  | 154  | 1.04 |                        |
| <i>ung</i>  | 3,896,703 | 3,897,380 | - | 392  | 282  | 1.39 | 462  | 400  | 1.15 |                        |
| <i>ywdF</i> | 3,897,394 | 3,898,200 | - | 358  | 280  | 1.28 | 573  | 516  | 1.11 |                        |
| <i>ywdE</i> | 3,898,291 | 3,898,824 | - | 75   | 77   | 0.97 | 102  | 125  | 0.82 |                        |
| <i>ywdD</i> | 3,898,872 | 3,899,363 | - | 65   | 68   | 0.96 | 109  | 166  | 0.66 |                        |
| <i>ywdC</i> | 3,899,406 | 3,899,834 | + | 29   | 34   | 0.84 | 31   | 34   | 0.93 |                        |
| <i>thiD</i> | 3,899,983 | 3,900,798 | + | 509  | 547  | 0.93 | 742  | 865  | 0.86 |                        |
| <i>ywdA</i> | 3,900,888 | 3,901,136 | - | 346  | 444  | 0.78 | 198  | 215  | 0.92 |                        |
| <i>sacA</i> | 3,901,230 | 3,902,672 | - | 318  | 399  | 0.80 | 292  | 395  | 0.74 |                        |
| <i>sacP</i> | 3,902,669 | 3,904,054 | - | 142  | 176  | 0.80 | 134  | 182  | 0.74 |                        |
| <i>ywcJ</i> | 3,904,356 | 3,905,126 | + | 1009 | 831  | 1.21 | 192  | 167  | 1.15 |                        |
| <i>sacT</i> | 3,905,165 | 3,905,995 | - | 102  | 135  | 0.76 | 118  | 142  | 0.83 |                        |
| <i>ywcI</i> | 3,906,035 | 3,906,337 | - | 83   | 99   | 0.83 | 81   | 135  | 0.60 |                        |
| <i>vpr</i>  | 3,906,867 | 3,909,287 | + | 456  | 416  | 1.10 | 698  | 598  | 1.17 |                        |
| <i>ywcH</i> | 3,909,325 | 3,910,326 | - | 187  | 172  | 1.09 | 176  | 156  | 1.12 | Spo0A regulon          |
| <i>nfrA</i> | 3,910,500 | 3,911,249 | - | 1010 | 995  | 1.01 | 989  | 818  | 1.21 | Spo0A and SigD regulon |
| <i>rodA</i> | 3,911,355 | 3,912,536 | - | 113  | 137  | 0.83 | 168  | 201  | 0.83 |                        |
| <i>ywcE</i> | 3,913,032 | 3,913,295 | + | 68   | 81   | 0.83 | 145  | 253  | 0.57 |                        |
| <i>qoxD</i> | 3,913,338 | 3,913,712 | - | 479  | 587  | 0.82 | 1154 | 999  | 1.16 |                        |
| <i>qoxC</i> | 3,913,714 | 3,914,328 | - | 4662 | 4618 | 1.01 | 3688 | 3412 | 1.08 |                        |
| <i>qoxB</i> | 3,914,342 | 3,916,291 | - | 4303 | 4292 | 1.00 | 3454 | 3160 | 1.09 |                        |
| <i>qoxA</i> | 3,916,319 | 3,917,284 | - | 3775 | 3832 | 0.99 | 2744 | 2836 | 0.97 |                        |
| <i>ywcA</i> | 3,917,895 | 3,918,044 | + | 2439 | 2195 | 1.11 | 1413 | 721  | 1.96 |                        |
| <i>galT</i> | 3,918,116 | 3,919,657 | - | 1132 | 882  | 1.28 | 666  | 588  | 1.13 |                        |
| <i>galK</i> | 3,919,661 | 3,920,833 | - | 903  | 738  | 1.22 | 607  | 459  | 1.32 |                        |
| <i>ywcD</i> | 3,920,914 | 3,921,297 | - | 188  | 184  | 1.02 | 200  | 230  | 0.87 |                        |
| <i>ywcC</i> | 3,921,315 | 3,921,986 | - | 143  | 156  | 0.92 | 125  | 144  | 0.87 |                        |
| <i>slrA</i> | 3,922,342 | 3,922,500 | + | 520  | 415  | 1.25 | 499  | 431  | 1.16 |                        |
| <i>ywcB</i> | 3,922,943 | 3,923,251 | + | 116  | 99   | 1.17 | 130  | 117  | 1.11 |                        |
| <i>ywcA</i> | 3,923,238 | 3,924,788 | + | 82   | 79   | 1.03 | 71   | 78   | 0.91 |                        |
| <i>ywbO</i> | 3,924,819 | 3,925,421 | - | 154  | 147  | 1.05 | 141  | 193  | 0.73 |                        |
| <i>ywbN</i> | 3,925,705 | 3,926,955 | - | 724  | 762  | 0.95 | 607  | 748  | 0.81 |                        |
| <i>ywbM</i> | 3,926,974 | 3,928,131 | - | 714  | 802  | 0.89 | 599  | 865  | 0.69 |                        |
| <i>ywbL</i> | 3,928,128 | 3,929,573 | - | 302  | 369  | 0.82 | 236  | 351  | 0.67 |                        |
| <i>thiE</i> | 3,929,730 | 3,930,398 | - | 636  | 521  | 1.22 | 565  | 525  | 1.08 |                        |
| <i>thiM</i> | 3,930,395 | 3,931,213 | - | 717  | 564  | 1.27 | 654  | 577  | 1.13 |                        |
| <i>ywbI</i> | 3,931,221 | 3,932,126 | - | 378  | 280  | 1.35 | 334  | 308  | 1.08 |                        |
| <i>ywbH</i> | 3,932,232 | 3,932,618 | + | 164  | 116  | 1.42 | 186  | 281  | 0.66 |                        |
| <i>ywbG</i> | 3,932,600 | 3,933,325 | + | 168  | 130  | 1.29 | 122  | 183  | 0.66 |                        |
| <i>ywbF</i> | 3,933,380 | 3,934,579 | + | 294  | 287  | 1.02 | 391  | 396  | 0.99 | AbrB regulon           |
| <i>ywbE</i> | 3,934,613 | 3,934,810 | + | 365  | 348  | 1.05 | 620  | 654  | 0.95 |                        |
| <i>ywbD</i> | 3,934,845 | 3,936,035 | - | 390  | 337  | 1.16 | 379  | 380  | 1.00 |                        |
| <i>ywbC</i> | 3,936,156 | 3,936,536 | + | 518  | 448  | 1.16 | 673  | 666  | 1.01 |                        |
| <i>ywbB</i> | 3,936,574 | 3,937,251 | - | 94   | 74   | 1.26 | 87   | 90   | 0.98 |                        |
| <i>ywbA</i> | 3,937,328 | 3,938,662 | - | 102  | 104  | 0.98 | 85   | 107  | 0.79 |                        |
| <i>epr</i>  | 3,938,890 | 3,940,827 | + | 2588 | 2029 | 1.28 | 1983 | 1706 | 1.16 | SigD regulon           |
| <i>sacX</i> | 3,941,255 | 3,942,634 | + | 108  | 100  | 1.08 | 168  | 176  | 0.96 |                        |
| <i>sacY</i> | 3,942,688 | 3,943,530 | + | 68   | 73   | 0.93 | 143  | 154  | 0.93 |                        |
| <i>gspA</i> | 3,943,581 | 3,944,441 | - | 6591 | 6291 | 1.05 | 3482 | 1801 | 1.93 |                        |
| <i>ywaF</i> | 3,944,551 | 3,945,264 | - | 62   | 62   | 1.00 | 50   | 57   | 0.88 |                        |
| <i>ywaE</i> | 3,945,415 | 3,945,930 | + | 207  | 227  | 0.91 | 219  | 248  | 0.88 |                        |
| <i>tyrZ</i> | 3,946,179 | 3,947,420 | + | 85   | 100  | 0.85 | 99   | 113  | 0.88 |                        |
| <i>ywaD</i> | 3,947,576 | 3,948,943 | + | 108  | 107  | 1.01 | 90   | 91   | 0.99 |                        |
| <i>ywaC</i> | 3,948,973 | 3,949,605 | - | 216  | 262  | 0.82 | 341  | 346  | 0.99 |                        |
| <i>menA</i> | 3,949,747 | 3,950,682 | - | 524  | 638  | 0.82 | 504  | 646  | 0.78 |                        |
| <i>dltA</i> | 3,951,296 | 3,952,807 | + | 1883 | 1592 | 1.18 | 2538 | 2331 | 1.09 | Spo0A and SigD regulon |
| <i>dltB</i> | 3,952,804 | 3,953,991 | + | 1776 | 1401 | 1.27 | 2768 | 2503 | 1.11 |                        |
| <i>dltC</i> | 3,954,008 | 3,954,244 | + | 2693 | 1951 | 1.38 | 3595 | 3190 | 1.13 |                        |
| <i>dltD</i> | 3,954,244 | 3,955,422 | + | 2223 | 1646 | 1.35 | 3091 | 2857 | 1.08 |                        |
| <i>dltE</i> | 3,955,513 | 3,956,271 | + | 1607 | 1256 | 1.28 | 2684 | 2438 | 1.10 |                        |
| <i>ywaA</i> | 3,956,412 | 3,957,503 | + | 1776 | 1808 | 0.98 | 1990 | 1976 | 1.01 |                        |
| <i>licH</i> | 3,957,537 | 3,958,865 | - | 118  | 175  | 0.67 | 104  | 189  | 0.55 |                        |
| <i>licA</i> | 3,958,862 | 3,959,194 | - | 137  | 222  | 0.62 | 113  | 212  | 0.54 |                        |
| <i>licC</i> | 3,959,213 | 3,960,571 | - | 118  | 164  | 0.72 | 95   | 149  | 0.64 |                        |
| <i>licB</i> | 3,960,587 | 3,960,895 | - | 70   | 112  | 0.63 | 96   | 120  | 0.80 |                        |
| <i>licR</i> | 3,961,023 | 3,962,948 | - | 229  | 236  | 0.97 | 201  | 269  | 0.75 |                        |
| <i>yxJ</i>  | 3,963,298 | 3,963,888 | - | 632  | 374  | 1.69 | 360  | 205  | 1.75 |                        |
| <i>katX</i> | 3,964,017 | 3,965,660 | + | 1601 | 857  | 1.87 | 1243 | 511  | 2.43 |                        |
| <i>yxIH</i> | 3,965,765 | 3,966,967 | + | 99   | 93   | 1.07 | 110  | 112  | 0.98 |                        |
| <i>yxIG</i> | 3,966,960 | 3,967,739 | - | 345  | 315  | 1.09 | 408  | 341  | 1.20 |                        |
| <i>yxIF</i> | 3,967,736 | 3,968,623 | - | 456  | 394  | 1.16 | 490  | 436  | 1.13 |                        |
| <i>yxIE</i> | 3,968,630 | 3,968,818 | - | 391  | 355  | 1.10 | 447  | 321  | 1.39 |                        |
| <i>yxID</i> | 3,968,815 | 3,969,021 | - | 361  | 300  | 1.20 | 445  | 353  | 1.26 |                        |
| <i>yxIC</i> | 3,969,018 | 3,969,338 | - | 212  | 192  | 1.11 | 244  | 213  | 1.15 |                        |
| <i>sigY</i> | 3,969,331 | 3,969,867 | - | 173  | 162  | 1.07 | 228  | 228  | 1.00 |                        |
| <i>yxIA</i> | 3,970,079 | 3,971,452 | + | 180  | 140  | 1.28 | 309  | 325  | 0.95 |                        |
| <i>yxkO</i> | 3,971,467 | 3,972,297 | - | 583  | 383  | 1.52 | 378  | 276  | 1.37 |                        |

|             |           |           |   |      |      |      |      |      |      |              |
|-------------|-----------|-----------|---|------|------|------|------|------|------|--------------|
| <i>cydD</i> | 3,972,383 | 3,974,110 | - | 1738 | 1564 | 1.11 | 110  | 86   | 1.28 |              |
| <i>cydC</i> | 3,974,107 | 3,975,810 | - | 2998 | 2640 | 1.14 | 171  | 102  | 1.68 |              |
| <i>cydB</i> | 3,975,810 | 3,976,826 | - | 3676 | 3193 | 1.15 | 282  | 133  | 2.13 |              |
| <i>cydA</i> | 3,976,810 | 3,978,216 | - | 2610 | 2184 | 1.20 | 512  | 392  | 1.31 |              |
| <i>yxkJ</i> | 3,978,772 | 3,980,124 | + | 761  | 872  | 0.87 | 436  | 516  | 0.85 |              |
| <i>yxkI</i> | 3,980,246 | 3,981,934 | + | 340  | 322  | 1.05 | 369  | 437  | 0.84 |              |
| <i>yxzE</i> | 3,981,992 | 3,982,192 | + | 382  | 406  | 0.94 | 732  | 671  | 1.09 | AbrB regulon |
| <i>yxkH</i> | 3,982,206 | 3,983,045 | - | 368  | 434  | 0.85 | 377  | 358  | 1.05 |              |
| <i>msmX</i> | 3,983,152 | 3,984,249 | - | 312  | 427  | 0.73 | 356  | 500  | 0.71 |              |
| <i>yxkF</i> | 3,984,370 | 3,985,263 | - | 176  | 190  | 0.93 | 144  | 199  | 0.72 |              |
| <i>aldY</i> | 3,985,447 | 3,986,904 | + | 913  | 738  | 1.24 | 322  | 200  | 1.61 |              |
| <i>yxkD</i> | 3,986,946 | 3,987,782 | - | 119  | 131  | 0.91 | 139  | 179  | 0.78 |              |
| <i>yxkC</i> | 3,988,251 | 3,988,892 | + | 4082 | 4454 | 0.92 | 4279 | 4278 | 1.00 | SigD regulon |
| <i>galE</i> | 3,988,967 | 3,989,986 | - | 1153 | 1182 | 0.98 | 1295 | 1444 | 0.90 |              |
| <i>yxkA</i> | 3,990,101 | 3,990,607 | - | 72   | 61   | 1.17 | 72   | 58   | 1.24 |              |
| <i>yxjO</i> | 3,990,737 | 3,991,612 | + | 114  | 125  | 0.92 | 105  | 138  | 0.76 |              |
| <i>yxjN</i> | 3,991,690 | 3,992,163 | + | 158  | 210  | 0.75 | 177  | 253  | 0.70 |              |
| <i>yxjM</i> | 3,992,181 | 3,993,401 | + | 105  | 110  | 0.95 | 115  | 136  | 0.85 |              |
| <i>yxjL</i> | 3,993,388 | 3,994,044 | + | 134  | 140  | 0.95 | 152  | 190  | 0.80 |              |
| <i>pepT</i> | 3,994,094 | 3,995,326 | + | 1065 | 1453 | 0.73 | 1210 | 1442 | 0.84 |              |
| <i>yxjJ</i> | 3,995,848 | 3,996,111 | + | 3027 | 3154 | 0.96 | 2512 | 1644 | 1.53 |              |
| <i>yxjI</i> | 3,996,240 | 3,996,728 | + | 431  | 377  | 1.14 | 494  | 461  | 1.07 |              |
| <i>yxjH</i> | 3,996,983 | 3,998,005 | + | 850  | 885  | 0.96 | 1072 | 1249 | 0.86 |              |
| <i>yxjG</i> | 3,998,368 | 3,999,504 | + | 1178 | 1469 | 0.80 | 1537 | 1907 | 0.81 |              |
| <i>yxjF</i> | 3,999,557 | 4,000,330 | - | 72   | 70   | 1.03 | 62   | 67   | 0.92 |              |
| <i>scoB</i> | 4,000,347 | 4,000,997 | - | 116  | 118  | 0.98 | 98   | 108  | 0.91 |              |
| <i>scoA</i> | 4,000,994 | 4,001,710 | - | 67   | 72   | 0.92 | 68   | 71   | 0.95 |              |
| <i>yxjC</i> | 4,001,734 | 4,003,152 | - | 78   | 75   | 1.05 | 55   | 66   | 0.84 |              |
| <i>yxjB</i> | 4,003,306 | 4,004,154 | - | 137  | 119  | 1.15 | 152  | 161  | 0.95 |              |
| <i>yxjA</i> | 4,004,770 | 4,005,963 | + | 61   | 86   | 0.71 | 210  | 233  | 0.90 |              |
| <i>yxjT</i> | 4,006,434 | 4,006,676 | - | 564  | 277  | 2.04 | 548  | 274  | 2.00 |              |
| <i>yxjS</i> | 4,006,821 | 4,007,111 | - | 1853 | 1248 | 1.48 | 1023 | 578  | 1.77 |              |
| <i>katE</i> | 4,007,161 | 4,009,221 | - | 4019 | 2846 | 1.41 | 1617 | 832  | 1.94 |              |
| <i>citH</i> | 4,009,422 | 4,010,702 | + | 52   | 54   | 0.95 | 41   | 45   | 0.90 |              |
| <i>bglS</i> | 4,010,860 | 4,011,588 | - | 106  | 141  | 0.75 | 104  | 135  | 0.77 |              |
| <i>licT</i> | 4,011,884 | 4,012,717 | - | 566  | 663  | 0.85 | 505  | 561  | 0.90 |              |
| <i>yxjP</i> | 4,012,813 | 4,013,493 | - | 337  | 338  | 1.00 | 305  | 341  | 0.89 |              |
| <i>yxjO</i> | 4,013,700 | 4,014,986 | + | 265  | 255  | 1.04 | 219  | 243  | 0.90 |              |
| <i>deaD</i> | 4,015,005 | 4,016,444 | - | 751  | 846  | 0.89 | 670  | 837  | 0.80 |              |
| <i>yxjM</i> | 4,016,526 | 4,017,674 | - | 711  | 852  | 0.83 | 604  | 777  | 0.78 |              |
| <i>yxjL</i> | 4,017,857 | 4,018,057 | - | 481  | 503  | 0.96 | 345  | 439  | 0.79 |              |
| <i>yxjK</i> | 4,018,166 | 4,018,627 | - | 897  | 1058 | 0.85 | 694  | 892  | 0.78 |              |
| <i>yxjI</i> | 4,018,643 | 4,018,939 | - | 938  | 1107 | 0.85 | 827  | 1003 | 0.83 |              |
| <i>yxjI</i> | 4,018,967 | 4,019,455 | - | 898  | 1083 | 0.83 | 884  | 993  | 0.89 |              |
| <i>yxzG</i> | 4,019,473 | 4,019,925 | - | 1144 | 1331 | 0.86 | 1054 | 1219 | 0.87 |              |
| <i>yxjH</i> | 4,019,995 | 4,020,324 | - | 806  | 895  | 0.90 | 605  | 746  | 0.81 |              |
| <i>yxjG</i> | 4,020,447 | 4,020,863 | - | 1473 | 1678 | 0.88 | 1238 | 1431 | 0.86 |              |
| <i>yxzC</i> | 4,020,914 | 4,021,282 | - | 1427 | 1687 | 0.85 | 1260 | 1614 | 0.78 |              |
| <i>yxjF</i> | 4,021,276 | 4,021,746 | - | 1340 | 1575 | 0.85 | 1213 | 1496 | 0.81 |              |
| <i>yxzG</i> | 4,022,072 | 4,022,500 | - | 3249 | 3355 | 0.97 | 2398 | 2850 | 0.84 |              |
| <i>wapA</i> | 4,022,562 | 4,029,566 | - | 3616 | 4367 | 0.83 | 3831 | 4224 | 0.91 |              |
| <i>yxzF</i> | 4,029,728 | 4,030,663 | - | 267  | 221  | 1.21 | 346  | 351  | 0.99 |              |
| <i>yxjE</i> | 4,030,815 | 4,031,261 | - | 1463 | 1827 | 0.80 | 996  | 1189 | 0.84 |              |
| <i>bglH</i> | 4,031,364 | 4,032,773 | - | 454  | 963  | 0.47 | 466  | 979  | 0.48 |              |
| <i>bglP</i> | 4,032,796 | 4,034,625 | - | 365  | 682  | 0.53 | 338  | 639  | 0.53 |              |
| <i>yxzE</i> | 4,035,008 | 4,035,316 | - | 102  | 60   | 1.70 | 150  | 126  | 1.19 |              |
| <i>yxzD</i> | 4,035,362 | 4,035,805 | - | 226  | 133  | 1.70 | 299  | 217  | 1.38 |              |
| <i>yxjD</i> | 4,035,802 | 4,037,511 | - | 349  | 205  | 1.70 | 368  | 283  | 1.30 |              |
| <i>yxjC</i> | 4,037,531 | 4,037,800 | - | 418  | 330  | 1.27 | 337  | 211  | 1.60 |              |
| <i>yxjB</i> | 4,037,812 | 4,038,177 | - | 434  | 457  | 0.95 | 331  | 234  | 1.42 |              |
| <i>yxjA</i> | 4,038,484 | 4,039,893 | - | 120  | 111  | 1.08 | 144  | 141  | 1.02 |              |
| <i>hutP</i> | 4,040,501 | 4,040,956 | + | 397  | 621  | 0.64 | 438  | 469  | 0.94 |              |
| <i>hutH</i> | 4,041,069 | 4,042,595 | + | 76   | 83   | 0.91 | 56   | 68   | 0.82 |              |
| <i>hutU</i> | 4,042,592 | 4,044,250 | + | 87   | 93   | 0.94 | 81   | 89   | 0.91 |              |
| <i>hutI</i> | 4,044,263 | 4,045,528 | + | 115  | 120  | 0.96 | 108  | 109  | 0.99 |              |
| <i>hutG</i> | 4,045,521 | 4,046,480 | + | 77   | 80   | 0.96 | 82   | 78   | 1.05 |              |
| <i>hutM</i> | 4,046,556 | 4,047,983 | + | 108  | 89   | 1.21 | 90   | 82   | 1.10 |              |
| <i>pdp</i>  | 4,048,027 | 4,049,328 | - | 682  | 706  | 0.97 | 523  | 582  | 0.90 |              |
| <i>nupC</i> | 4,049,358 | 4,050,539 | - | 739  | 692  | 1.07 | 543  | 556  | 0.98 |              |
| <i>dra</i>  | 4,050,655 | 4,051,290 | - | 1736 | 1405 | 1.24 | 1286 | 1047 | 1.23 |              |
| <i>deoR</i> | 4,051,396 | 4,052,337 | - | 351  | 422  | 0.83 | 270  | 398  | 0.68 |              |
| <i>yxzB</i> | 4,052,428 | 4,053,297 | - | 394  | 410  | 0.96 | 202  | 137  | 1.47 |              |
| <i>yxzR</i> | 4,053,370 | 4,054,482 | - | 383  | 282  | 1.36 | 421  | 342  | 1.23 |              |
| <i>yxzQ</i> | 4,054,552 | 4,055,889 | - | 378  | 260  | 1.46 | 422  | 298  | 1.42 |              |
| <i>yxzP</i> | 4,055,886 | 4,057,028 | - | 683  | 418  | 1.64 | 690  | 487  | 1.42 |              |
| <i>yxzO</i> | 4,057,045 | 4,057,794 | - | 539  | 298  | 1.81 | 678  | 482  | 1.41 |              |
| <i>yxzN</i> | 4,057,807 | 4,058,481 | - | 609  | 308  | 1.98 | 677  | 475  | 1.42 |              |
| <i>yxzM</i> | 4,058,504 | 4,059,298 | - | 659  | 297  | 2.22 | 898  | 641  | 1.40 |              |
| <i>yxzL</i> | 4,059,323 | 4,059,820 | - | 428  | 247  | 1.73 | 635  | 474  | 1.34 |              |
| <i>yxzK</i> | 4,059,834 | 4,061,159 | - | 286  | 180  | 1.59 | 444  | 382  | 1.16 |              |
| <i>yxzJ</i> | 4,061,345 | 4,061,572 | - | 24   | 33   | 0.71 | 34   | 35   | 0.97 |              |
| <i>yxzI</i> | 4,061,559 | 4,062,545 | - | 71   | 70   | 1.01 | 107  | 110  | 0.97 |              |
| <i>yxzH</i> | 4,062,700 | 4,063,512 | - | 591  | 444  | 1.33 | 926  | 862  | 1.07 |              |
| <i>yxzG</i> | 4,063,552 | 4,064,109 | - | 204  | 151  | 1.35 | 302  | 306  | 0.99 |              |
| <i>yxzF</i> | 4,064,090 | 4,064,524 | - | 369  | 270  | 1.36 | 530  | 568  | 0.93 |              |
| <i>yxzE</i> | 4,064,612 | 4,064,977 | + | 67   | 77   | 0.87 | 37   | 45   | 0.81 |              |
| <i>yxzD</i> | 4,065,225 | 4,065,578 | + | 29   | 39   | 0.75 | 26   | 29   | 0.90 | AbrB regulon |
| <i>yxzC</i> | 4,065,622 | 4,066,020 | - | 540  | 581  | 0.93 | 646  | 718  | 0.90 |              |
| <i>yxzB</i> | 4,066,198 | 4,067,157 | + | 944  | 1437 | 0.66 | 462  | 865  | 0.53 |              |
| <i>yxzA</i> | 4,067,204 | 4,067,551 | - | 99   | 100  | 0.98 | 98   | 116  | 0.84 |              |
| <i>yxzM</i> | 4,067,565 | 4,069,433 | - | 79   | 79   | 1.00 | 70   | 75   | 0.92 |              |

|              |           |           |   |      |      |      |      |      |      |                        |
|--------------|-----------|-----------|---|------|------|------|------|------|------|------------------------|
| <i>yxdL</i>  | 4,069,408 | 4,070,181 | - | 68   | 71   | 0.96 | 68   | 73   | 0.94 |                        |
| <i>yxdK</i>  | 4,070,325 | 4,071,302 | - | 167  | 146  | 1.15 | 172  | 171  | 1.01 |                        |
| <i>yxdJ</i>  | 4,071,299 | 4,071,988 | - | 201  | 180  | 1.12 | 197  | 196  | 1.00 |                        |
| <i>fbxB</i>  | 4,072,097 | 4,072,969 | - | 149  | 181  | 0.82 | 182  | 214  | 0.85 |                        |
| <i>ioll</i>  | 4,072,990 | 4,073,826 | - | 104  | 137  | 0.76 | 129  | 172  | 0.75 |                        |
| <i>iollH</i> | 4,073,912 | 4,074,781 | - | 90   | 121  | 0.74 | 101  | 144  | 0.70 |                        |
| <i>idh</i>   | 4,074,801 | 4,075,835 | - | 129  | 158  | 0.82 | 155  | 234  | 0.67 |                        |
| <i>iolF</i>  | 4,075,858 | 4,077,177 | - | 121  | 141  | 0.85 | 108  | 148  | 0.73 |                        |
| <i>iolE</i>  | 4,077,192 | 4,078,085 | - | 107  | 140  | 0.76 | 108  | 155  | 0.70 |                        |
| <i>iolD</i>  | 4,078,102 | 4,079,844 | - | 134  | 175  | 0.77 | 150  | 219  | 0.68 |                        |
| <i>iolC</i>  | 4,080,048 | 4,081,025 | - | 104  | 145  | 0.72 | 125  | 175  | 0.71 |                        |
| <i>iolB</i>  | 4,081,049 | 4,081,864 | - | 53   | 83   | 0.64 | 89   | 120  | 0.74 |                        |
| <i>mmsA</i>  | 4,081,939 | 4,083,402 | - | 116  | 144  | 0.80 | 159  | 226  | 0.71 |                        |
| <i>iolR</i>  | 4,083,818 | 4,084,573 | + | 225  | 262  | 0.86 | 325  | 368  | 0.88 |                        |
| <i>iolS</i>  | 4,084,627 | 4,085,559 | + | 645  | 666  | 0.97 | 1221 | 1095 | 1.12 |                        |
| <i>yxcE</i>  | 4,085,821 | 4,086,471 | + | 363  | 409  | 0.89 | 330  | 280  | 1.18 |                        |
| <i>yxcD</i>  | 4,086,475 | 4,086,783 | + | 143  | 149  | 0.96 | 154  | 137  | 1.13 |                        |
| <i>csbC</i>  | 4,087,022 | 4,088,407 | + | 5252 | 4913 | 1.07 | 1799 | 911  | 1.98 |                        |
| <i>htpG</i>  | 4,088,449 | 4,090,329 | - | 888  | 846  | 1.05 | 1303 | 1228 | 1.06 |                        |
| <i>yxcA</i>  | 4,090,497 | 4,090,748 | - | 226  | 201  | 1.13 | 285  | 296  | 0.96 |                        |
| <i>yxbG</i>  | 4,090,865 | 4,091,686 | + | 1636 | 1435 | 1.14 | 680  | 347  | 1.96 |                        |
| <i>yxbF</i>  | 4,091,715 | 4,092,857 | - | 120  | 114  | 1.06 | 129  | 143  | 0.91 |                        |
| <i>aldX</i>  | 4,093,000 | 4,094,337 | + | 133  | 137  | 0.97 | 121  | 139  | 0.87 |                        |
| <i>yxbD</i>  | 4,094,376 | 4,094,855 | - | 271  | 268  | 1.01 | 716  | 807  | 0.89 | AbrB regulon           |
| <i>yxbC</i>  | 4,094,935 | 4,095,927 | - | 1807 | 2140 | 0.84 | 1970 | 2156 | 0.91 | Spo0A and AbrB regulon |
| <i>yxbB</i>  | 4,096,436 | 4,097,170 | + | 2055 | 2437 | 0.84 | 2289 | 2715 | 0.84 | AbrB regulon           |
| <i>yxbA</i>  | 4,097,170 | 4,097,439 | + | 1481 | 1801 | 0.82 | 1875 | 2153 | 0.87 | AbrB regulon           |
| <i>yxnB</i>  | 4,097,443 | 4,097,925 | + | 1257 | 1580 | 0.80 | 1606 | 2019 | 0.80 | AbrB regulon           |
| <i>asnH</i>  | 4,097,946 | 4,100,189 | + | 471  | 607  | 0.78 | 790  | 1134 | 0.70 |                        |
| <i>yxaM</i>  | 4,100,186 | 4,101,385 | + | 364  | 532  | 0.68 | 599  | 893  | 0.67 |                        |
| <i>yxaL</i>  | 4,101,449 | 4,102,681 | - | 1357 | 1021 | 1.33 | 965  | 853  | 1.13 | AbrB regulon           |
| <i>yxaJ</i>  | 4,102,782 | 4,103,210 | - | 438  | 336  | 1.30 | 642  | 571  | 1.12 | AbrB regulon           |
| <i>yxaI</i>  | 4,103,467 | 4,103,922 | + | 198  | 243  | 0.82 | 363  | 476  | 0.76 |                        |
| <i>yxaH</i>  | 4,103,952 | 4,105,160 | - | 148  | 181  | 0.82 | 163  | 234  | 0.70 |                        |
| <i>yxaG</i>  | 4,105,268 | 4,106,281 | - | 194  | 251  | 0.77 | 261  | 390  | 0.67 |                        |
| <i>yxaF</i>  | 4,106,375 | 4,106,950 | - | 62   | 63   | 1.00 | 84   | 96   | 0.87 |                        |
| <i>yxaA</i>  | 4,107,081 | 4,108,151 | + | 2137 | 1683 | 1.27 | 768  | 339  | 2.27 |                        |
| <i>yxaD</i>  | 4,108,208 | 4,108,639 | - | 84   | 87   | 0.96 | 80   | 110  | 0.73 |                        |
| <i>yxaC</i>  | 4,108,866 | 4,109,933 | + | 83   | 70   | 1.19 | 71   | 70   | 1.02 |                        |
| <i>yxaB</i>  | 4,109,973 | 4,111,004 | - | 1142 | 732  | 1.56 | 784  | 362  | 2.17 | AbrB regulon           |
| <i>yxaA</i>  | 4,111,097 | 4,112,245 | - | 235  | 187  | 1.26 | 280  | 233  | 1.20 | AbrB regulon           |
| <i>gntR</i>  | 4,112,441 | 4,113,172 | + | 220  | 200  | 1.10 | 553  | 375  | 1.48 | AbrB regulon           |
| <i>gntK</i>  | 4,113,165 | 4,114,706 | + | 282  | 254  | 1.11 | 313  | 282  | 1.11 | AbrB regulon           |
| <i>gntP</i>  | 4,114,735 | 4,116,081 | + | 280  | 223  | 1.26 | 338  | 315  | 1.07 | AbrB regulon           |
| <i>gntZ</i>  | 4,116,104 | 4,117,510 | + | 453  | 326  | 1.39 | 775  | 683  | 1.13 | AbrB regulon           |
| <i>ahpC</i>  | 4,117,974 | 4,118,537 | + | 5697 | 4845 | 1.18 | 5545 | 4931 | 1.12 |                        |
| <i>ahpF</i>  | 4,118,551 | 4,120,080 | + | 4890 | 4316 | 1.13 | 4409 | 3848 | 1.15 |                        |
| <i>bglA</i>  | 4,120,190 | 4,121,629 | - | 121  | 120  | 1.01 | 136  | 153  | 0.88 |                        |
| <i>yyzE</i>  | 4,121,643 | 4,121,873 | - | 138  | 132  | 1.05 | 139  | 171  | 0.81 |                        |
| <i>yydK</i>  | 4,122,217 | 4,122,927 | + | 167  | 162  | 1.03 | 147  | 172  | 0.86 |                        |
| <i>yydJ</i>  | 4,123,244 | 4,123,966 | - | 487  | 457  | 1.06 | 888  | 1144 | 0.78 | AbrB regulon           |
| <i>yydI</i>  | 4,123,987 | 4,124,616 | - | 975  | 919  | 1.06 | 1386 | 1776 | 0.78 | AbrB regulon           |
| <i>yydH</i>  | 4,124,766 | 4,125,524 | - | 489  | 458  | 1.07 | 1012 | 1390 | 0.73 | AbrB regulon           |
| <i>yydG</i>  | 4,125,505 | 4,126,464 | - | 291  | 263  | 1.11 | 1064 | 1471 | 0.72 | AbrB regulon           |
| <i>fbp</i>   | 4,127,053 | 4,129,068 | + | 371  | 342  | 1.08 | 670  | 695  | 0.96 |                        |
| <i>yydD</i>  | 4,129,602 | 4,131,362 | - | 1359 | 958  | 1.42 | 1053 | 1004 | 1.05 |                        |
| <i>yydC</i>  | 4,131,362 | 4,131,760 | - | 1126 | 762  | 1.48 | 746  | 636  | 1.17 |                        |
| <i>yydB</i>  | 4,131,753 | 4,133,198 | - | 1074 | 890  | 1.21 | 879  | 799  | 1.10 |                        |
| <i>yydA</i>  | 4,133,460 | 4,133,939 | - | 547  | 557  | 0.98 | 539  | 509  | 1.06 |                        |
| <i>yycS</i>  | 4,134,376 | 4,134,789 | + | 144  | 120  | 1.20 | 118  | 119  | 0.99 |                        |
| <i>yyeR</i>  | 4,134,823 | 4,136,049 | - | 490  | 367  | 1.34 | 351  | 306  | 1.15 |                        |
| <i>yyeQ</i>  | 4,136,387 | 4,136,635 | - | 38   | 54   | 0.70 | 47   | 55   | 0.85 |                        |
| <i>yyeP</i>  | 4,136,651 | 4,137,814 | - | 76   | 83   | 0.93 | 72   | 86   | 0.84 |                        |
| <i>yyeO</i>  | 4,137,825 | 4,138,562 | - | 104  | 102  | 1.02 | 85   | 95   | 0.89 |                        |
| <i>yyeN</i>  | 4,138,704 | 4,139,174 | - | 198  | 183  | 1.08 | 194  | 207  | 0.94 |                        |
| <i>rapG</i>  | 4,139,285 | 4,140,382 | + | 596  | 638  | 0.93 | 763  | 883  | 0.86 |                        |
| <i>rocF</i>  | 4,140,735 | 4,141,625 | - | 553  | 573  | 0.96 | 892  | 750  | 1.19 |                        |
| <i>rocE</i>  | 4,141,699 | 4,143,102 | - | 426  | 485  | 0.88 | 661  | 557  | 1.19 |                        |
| <i>rocD</i>  | 4,143,325 | 4,144,530 | - | 750  | 898  | 0.84 | 749  | 634  | 1.18 |                        |
| <i>rocR</i>  | 4,144,771 | 4,146,156 | + | 172  | 166  | 1.03 | 237  | 277  | 0.86 | Spo0A regulon          |
| <i>yyxA</i>  | 4,146,591 | 4,147,793 | - | 513  | 383  | 1.34 | 926  | 753  | 1.23 |                        |
| <i>yyeJ</i>  | 4,147,862 | 4,148,668 | - | 546  | 405  | 1.35 | 897  | 715  | 1.25 |                        |
| <i>yyeI</i>  | 4,148,690 | 4,149,532 | - | 693  | 494  | 1.40 | 1239 | 1059 | 1.17 |                        |
| <i>yyeH</i>  | 4,149,519 | 4,150,886 | - | 676  | 486  | 1.39 | 1102 | 931  | 1.18 |                        |
| <i>yyeG</i>  | 4,150,876 | 4,152,711 | - | 678  | 515  | 1.32 | 873  | 748  | 1.17 |                        |
| <i>yyeF</i>  | 4,152,719 | 4,153,426 | - | 700  | 609  | 1.15 | 818  | 678  | 1.21 |                        |
| <i>pprA</i>  | 4,154,457 | 4,155,749 | - | 1780 | 1696 | 1.05 | 1285 | 1674 | 0.77 |                        |
| <i>yyeE</i>  | 4,155,955 | 4,156,374 | - | 34   | 40   | 0.86 | 45   | 52   | 0.88 |                        |
| <i>dnaC</i>  | 4,156,495 | 4,157,859 | - | 319  | 295  | 1.08 | 381  | 433  | 0.88 |                        |
| <i>yyeD</i>  | 4,158,029 | 4,158,229 | + | 806  | 746  | 1.08 | 808  | 376  | 2.15 |                        |
| <i>yyzB</i>  | 4,158,277 | 4,158,480 | - | 64   | 63   | 1.01 | 60   | 58   | 1.04 |                        |
| <i>yyeB</i>  | 4,158,814 | 4,160,022 | + | 1608 | 1542 | 1.04 | 1553 | 1508 | 1.03 |                        |
| <i>yyeA</i>  | 4,160,127 | 4,162,184 | + | 338  | 313  | 1.08 | 359  | 337  | 1.06 |                        |
| <i>tpiI</i>  | 4,162,221 | 4,162,670 | - | 1149 | 1106 | 1.04 | 1328 | 1474 | 0.90 |                        |
| <i>yybT</i>  | 4,162,667 | 4,164,646 | - | 996  | 721  | 1.38 | 965  | 1003 | 0.96 |                        |
| <i>yybS</i>  | 4,164,683 | 4,165,612 | - | 599  | 411  | 1.46 | 516  | 552  | 0.93 |                        |
| <i>coiF</i>  | 4,166,134 | 4,166,616 | + | 30   | 36   | 0.82 | 27   | 31   | 0.89 |                        |
| <i>yybR</i>  | 4,166,646 | 4,167,023 | - | 122  | 90   | 1.35 | 126  | 141  | 0.89 |                        |
| <i>ppaC</i>  | 4,167,228 | 4,168,157 | + | 1923 | 2143 | 0.90 | 2054 | 2422 | 0.85 |                        |
| <i>yybP</i>  | 4,168,190 | 4,168,636 | - | 146  | 137  | 1.07 | 123  | 130  | 0.94 |                        |
| <i>yybO</i>  | 4,169,069 | 4,170,376 | + | 761  | 389  | 1.96 | 294  | 132  | 2.23 |                        |



|                |           |           |   |      |      |      |      |      |      |
|----------------|-----------|-----------|---|------|------|------|------|------|------|
| <i>yybN</i>    | 4,172,138 | 4,172,575 | + | 3420 | 3365 | 1.02 | 3150 | 3686 | 0.85 |
| <i>yybM</i>    | 4,172,689 | 4,173,444 | + | 553  | 492  | 1.12 | 540  | 800  | 0.67 |
| <i>yybL</i>    | 4,173,434 | 4,174,144 | + | 169  | 135  | 1.25 | 276  | 528  | 0.52 |
| <i>yybK</i>    | 4,174,141 | 4,174,896 | + | 154  | 136  | 1.13 | 231  | 454  | 0.51 |
| <i>yybJ</i>    | 4,174,893 | 4,175,549 | + | 404  | 352  | 1.15 | 548  | 840  | 0.65 |
| <i>yybI</i>    | 4,175,924 | 4,176,712 | - | 142  | 161  | 0.89 | 136  | 138  | 0.99 |
| <i>yybH</i>    | 4,176,780 | 4,177,169 | - | 168  | 186  | 0.90 | 158  | 184  | 0.86 |
| <i>yybG</i>    | 4,177,315 | 4,178,154 | + | 236  | 228  | 1.04 | 244  | 251  | 0.97 |
| <i>yybF</i>    | 4,178,187 | 4,179,401 | - | 95   | 90   | 1.06 | 143  | 166  | 0.86 |
| <i>yybE</i>    | 4,179,630 | 4,180,466 | + | 74   | 80   | 0.92 | 76   | 98   | 0.78 |
| <i>yybD</i>    | 4,180,480 | 4,180,923 | + | 112  | 120  | 0.93 | 117  | 140  | 0.84 |
| <i>yybC</i>    | 4,181,006 | 4,181,485 | + | 67   | 63   | 1.06 | 80   | 92   | 0.87 |
| <i>yybB</i>    | 4,181,660 | 4,182,322 | - | 336  | 266  | 1.26 | 248  | 232  | 1.07 |
| <i>yybA</i>    | 4,182,469 | 4,182,921 | - | 206  | 195  | 1.06 | 212  | 240  | 0.88 |
| <i>yyaT</i>    | 4,183,041 | 4,183,487 | + | 93   | 124  | 0.75 | 113  | 167  | 0.68 |
| <i>yyaS</i>    | 4,183,484 | 4,184,089 | + | 36   | 49   | 0.74 | 53   | 74   | 0.72 |
| <i>yyaR</i>    | 4,184,184 | 4,184,705 | - | 55   | 51   | 1.08 | 85   | 76   | 1.12 |
| <i>yyaQ</i>    | 4,185,116 | 4,185,472 | + | 271  | 221  | 1.23 | 236  | 199  | 1.19 |
| <i>yyaP</i>    | 4,185,632 | 4,186,198 | + | 118  | 109  | 1.09 | 139  | 134  | 1.04 |
| <i>tetB</i>    | 4,186,705 | 4,188,081 | - | 1354 | 1461 | 0.93 | 930  | 978  | 0.95 |
| <i>yyaO</i>    | 4,188,430 | 4,188,669 | + | 368  | 361  | 1.02 | 270  | 186  | 1.45 |
| <i>yyaN</i>    | 4,188,820 | 4,189,236 | + | 35   | 38   | 0.90 | 39   | 46   | 0.85 |
| <i>yyaM</i>    | 4,189,233 | 4,190,150 | + | 49   | 45   | 1.10 | 57   | 53   | 1.08 |
| <i>yyaL</i>    | 4,190,222 | 4,192,291 | + | 615  | 481  | 1.28 | 522  | 455  | 1.15 |
| <i>yyaK</i>    | 4,192,288 | 4,193,187 | - | 738  | 600  | 1.23 | 810  | 727  | 1.11 |
| <i>yyaJ</i>    | 4,193,413 | 4,194,768 | + | 101  | 96   | 1.06 | 93   | 99   | 0.93 |
| <i>maa</i>     | 4,194,802 | 4,195,356 | - | 225  | 219  | 1.03 | 228  | 236  | 0.97 |
| <i>yyaH</i>    | 4,195,374 | 4,195,754 | - | 203  | 238  | 0.85 | 266  | 282  | 0.94 |
| <i>ccpB</i>    | 4,195,810 | 4,196,745 | - | 132  | 126  | 1.05 | 120  | 114  | 1.05 |
| <i>exoA</i>    | 4,196,804 | 4,197,562 | - | 114  | 115  | 1.00 | 153  | 155  | 0.99 |
| <i>rpsR</i>    | 4,197,627 | 4,197,866 | - | 901  | 1118 | 0.81 | 1541 | 1416 | 1.09 |
| <i>ssb</i>     | 4,197,910 | 4,198,428 | - | 6595 | 7206 | 0.92 | 6355 | 6094 | 1.04 |
| <i>rpsF</i>    | 4,198,469 | 4,198,756 | - | 7759 | 8462 | 0.92 | 7060 | 6696 | 1.05 |
| <i>yyaF</i>    | 4,198,867 | 4,199,967 | - | 1092 | 1216 | 0.90 | 1593 | 2105 | 0.76 |
| <i>yyaE</i>    | 4,200,094 | 4,202,097 | - | 234  | 209  | 1.12 | 301  | 300  | 1.00 |
| <i>yyaD</i>    | 4,202,448 | 4,203,464 | - | 52   | 57   | 0.92 | 55   | 64   | 0.85 |
| <i>yyaC</i>    | 4,203,924 | 4,204,541 | + | 62   | 63   | 0.98 | 53   | 69   | 0.76 |
| <i>spo0J</i>   | 4,204,580 | 4,205,428 | - | 1216 | 1053 | 1.15 | 1308 | 1158 | 1.13 |
| <i>soj</i>     | 4,205,421 | 4,206,182 | - | 1343 | 1173 | 1.14 | 1282 | 1223 | 1.05 |
| <i>yyaB</i>    | 4,206,430 | 4,206,870 | + | 175  | 191  | 0.92 | 182  | 176  | 1.03 |
| <i>yyaA</i>    | 4,206,921 | 4,207,772 | - | 1224 | 1195 | 1.02 | 1880 | 1638 | 1.15 |
| <i>gidB</i>    | 4,207,894 | 4,208,613 | - | 1002 | 769  | 1.30 | 1719 | 1504 | 1.14 |
| <i>gidA</i>    | 4,208,627 | 4,210,513 | - | 897  | 686  | 1.31 | 1468 | 1278 | 1.15 |
| <i>thdF</i>    | 4,210,534 | 4,211,913 | - | 555  | 442  | 1.26 | 718  | 704  | 1.02 |
| <i>jag</i>     | 4,212,224 | 4,212,850 | - | 1174 | 1123 | 1.05 | 1897 | 2478 | 0.77 |
| <i>spoIIIJ</i> | 4,212,847 | 4,213,632 | - | 1148 | 1087 | 1.06 | 1472 | 1925 | 0.76 |
| <i>rnpA</i>    | 4,213,777 | 4,214,127 | - | 427  | 416  | 1.03 | 884  | 1340 | 0.66 |

Spo0A regulon

<sup>a</sup> Spo0A, AbrB and SigD regulons shown here are described in References 6, 2 and 12, respectively.
